# Supplementary material for: CRMP4-mediated fornix development involves Semaphorin-3E signaling pathway
Source: eLife journal article supplement (doi:10.7554/elife.70361), 2021-12-03
Supplement: fig2-data1 [file Figure 2A-source Data 1.xlsx]

## Sheet: siCRMP1
	Relative Intensity
CTL	14887			CRMP 1	GAPDH	Ratio
si CRMP1	6774		CTL	14887	11371	1.30921	100
CTL GAPDH	11371		si CRMP1	6774	10579	0.640325	48.9094
si CRMP1 GAPDH	10579
									% inhibition
CTL	1457			CRMP 1	GAPDH	Ratio			51.0906
si CRMP1	749		CTL	1457	3969	0.367095	100		41.4535
CTL GAPDH	3969		si CRMP1	749	3485	0.214921	58.5465		45.1574
si CRMP1 GAPDH	3485
CTL	5954			CRMP 1	GAPDH	Ratio
si CRMP1	2770		CTL	5954	15472	0.384824	100
CTL GAPDH	15472		si CRMP1	2770	13125	0.211048	54.8426
si CRMP1 GAPDH	13125

## Sheet: siCRMP2
CTL	6232			CRMP 2	GAPDH	Ratio
si CRMP2	1373		CTL	6232	15786	0.39478	100
CTL GAPDH	15786		si CRMP2	1373	11716	0.11719	29.6849
si CRMP2 GAPDH	11716
CTL	7146			CRMP 2	GAPDH	Ratio
si CRMP2	1114		CTL	7146	13651	0.523478	100		% inhibition
CTL GAPDH	13651		si CRMP2	1114	13951	0.0798509	15.2539		70.3151
si CRMP2 GAPDH	13951								84.7461
									93.956
CTL	5676.1820			CRMP 2	GAPDH	Ratio
si CRMP2	445.8150		CTL	5676	8302	0.683691	100
CTL GAPDH	8302.3127		si CRMP2	445	10769	0.0413223	6.04401
si CRMP2 GAPDH	10769.4764

## Sheet: siCRMP4
	Relative Intensity
CTL	10127			CRMP 4	GAPDH	Ratio
si CRMP4	4009		CTL	10127	15082	0.671463	100
CTL GAPDH	15082		si CRMP4	4009	10705	0.374498	55.7735
si CRMP4 GAPDH	10705
CTL	13732			CRMP 4	GAPDH	Ratio			% inhibition
CRMP4	4439		CTL	13732	10203	1.34588	100		44.2265
CTL GAPDH	10203		si CRMP4	4439	9961	0.445638	33.1113		66.8887
CRMP4 GAPDH	9961								69.7531
CTL	16709
CRMP4	8153			CRMP 4	GAPDH	Ratio
CTL GAPDH	5866		CTL	16709	5866	2.84845	100
CRMP4 GAPDH	9463		si CRMP4	8153	9463	0.861566	30.2469
