# Supplementary material for: CRMP4-mediated fornix development involves Semaphorin-3E signaling pathway
Source: eLife journal article supplement (doi:10.7554/elife.70361), 2021-12-03
Supplement: fig2-data1 [file Figure 2B-G-source Data 1.xlsx]

## Sheet: Figure  2B
	raw data axonal length (pixel)								siRNA effect: Normalized axonal length (%)
	WT siRNA ctrl	WT siRNA CRMP1 Ctrl	WT siRNA CRMP2 Ctrl	WT siRNA CRMP4 Ctrl					WT siRNA ctrl	WT siRNA CRMP1 Ctrl	WT siRNA CRMP2 Ctrl	WT siRNA CRMP4 Ctrl
	408.73	477.413	322.572	253.096					94.3935	110.255	74.4959	58.4509
	199.657	387.95	344.99	289.545					46.1095	89.5945	79.6732	66.8685
	187.425	219.063	284.275	334.455					43.2846	50.5912	65.6514	77.2402
	176.086	240.917	624.529	372.314					40.6659	55.6382	144.231	85.9835
	303.25	446.944	237.911	258.279					70.0336	103.219	54.944	59.6478
	495.807	195.379	506.807	228.037					114.503	45.1215	117.044	52.6636
	306.285	320.85	489.826	463.849					70.7345	74.0982	113.122	107.123
	319.991	350.994	393.783	306.212					73.8998	81.0598	90.9416	70.7176
	329.333	242.259	453.778	218.663					76.0573	55.9481	104.797	50.4988
	232.116	303.816	841.322	269.339					53.6057	70.1643	194.298	62.2021
	347.906	309.455	375.397	193.131					80.3466	71.4666	86.6955	44.6023
	319.572	407.415	365.169	315.576					73.8031	94.0898	84.3334	72.8802
	435.319	324.201	260.55	214.195					100.534	74.8721	60.1723	49.4669
	296.432	306.895	338.36	441.163					68.459	70.8754	78.142	101.884
	212.844	162.01	376.628	417.91					49.1549	37.4151	86.9798	96.5136
	179.499	310.167	161.257	438.012					41.4541	71.631	37.2412	101.156
	337.875	307.79	503.078	404.524					78.03	71.0821	116.183	93.4222
	214.842	660.641	812.108	261.14					49.6163	152.571	187.551	60.3086
	331.309	446.83	328.048	245.648					76.5136	103.192	75.7605	56.7308
	322.691	279.081	354.819	470.945					74.5234	64.4519	81.9431	108.762
	295.581	365.533	475.487	318.945					68.2625	84.4174	109.811	73.6583
	258.579	246.199	249.9	494.892					59.7171	56.858	57.7128	114.292
	214.523	370.957	644.159	537.706					49.5427	85.6701	148.764	124.18
	1055.12	525.587	391.204	269.772					243.673	121.381	90.346	62.3021
	200.884	376.422	342.308	372.998					46.3928	86.9322	79.0538	86.1414
	208.359	475.884	216.172	408.626					48.1191	109.902	49.9235	94.3695
	140.101	328.376	373.402	332.24					32.3554	75.8363	86.2347	76.7286
	199.118	264.429	566.745	754.223					45.985	61.0681	130.886	174.183
	288.849	407.68	482.66	389.175					66.7078	94.151	111.467	89.8774
	552.344	442.138	824.553	382.221					127.56	102.109	190.425	88.2714
	392	278.459	293.05	186.027					90.5298	64.3083	67.678	42.9617
	243.359	561.415	456.559	515.417					56.2022	129.655	105.439	119.032
	269.481	457.1	335.406	235.498					62.2349	105.564	77.4598	54.3867
	276.828	255.564	346.259	403.005					63.9316	59.0208	79.9662	93.0714
	453.456	359.749	230.44	193.046					104.723	83.0817	53.2186	44.5827
	218.02	451.701	430.906	424.316					50.3503	104.317	99.5149	97.993
	262.462	281.519	235.168	783.966					60.6139	65.015	54.3105	181.052
	353.728	414.078	277.005	526.08					81.6912	95.6286	63.9725	121.495
	251.369	551.956	573.051	259.657					58.052	127.471	132.342	59.9661
	267.663	444.281	486.935	271.847					61.815	102.604	112.454	62.7813
	423.201	472.207	440.847	213.036					97.7355	109.053	101.811	49.1993
	327.833	444.188	345.768	362.573					75.7109	102.582	79.8528	83.7338
	286.324	373.102	338.132	478.091					66.1246	86.1655	78.0894	110.412
	254.707	570.844	563.522	419.239					58.8229	131.833	130.142	96.8205
	233.277	363.641	465.693	526.472					53.8738	83.9805	107.549	121.585
	432.826	358.822	582.245	524.812					99.9583	82.8676	134.466	121.202
	436.585	184.951	558.607	771.39					100.826	42.7132	129.007	178.147
	382.387	281.341	307.473	193.017					88.3098	64.9739	71.0089	44.576
	206.143	732.704	250.051	459.959					47.6074	169.213	57.7476	106.225
	376.181	515.9	303.667	551.965					86.8765	119.144	70.1299	127.473
	263.389	263.095	508.294	333.938					60.828	60.7601	117.387	77.1208
	282.52	220.066	420.618	217.917					65.2461	50.8228	97.139	50.3265
	232.11	383.101	402.215	447.843					53.6043	88.4747	92.8889	103.426
	318.045	453.122	286.712	271.059					73.4504	104.646	66.2143	62.5993
	192.565	194.647	198.939	581.871					44.4716	44.9524	45.9437	134.379
	374.661	876.796	336.388	287.201					86.5255	202.49	77.6866	66.3272
	245.639	1072.18	197.236	284.047					56.7287	247.612	45.5504	65.5988
	231.374	480.071	479.142	782.768					53.4343	110.869	110.655	180.775
	375.929	586.453	406.47	493.556					86.8183	135.437	93.8716	113.984
	446.783	398.512	341.301	395.333					103.182	92.0337	78.8212	91.2996
	266.33	222.642	479.531	540.458					61.5072	51.4177	110.745	124.815
	725.09	591.06	566.871	269.33					167.455	136.501	130.915	62.2
	319.039	204.235	292.415	436.23					73.68	47.1667	67.5313	100.744
	296.248	159.939	421.121	222.144					68.4165	36.9369	97.2551	51.3027
	443.923	191.497	523.205	276.01					102.521	44.225	120.831	63.7427
	359.191	286.64	458.559	547.212					82.9528	66.1976	105.901	126.375
	473.593	327.509	206.109	355.33					109.373	75.636	47.5995	82.0611
	422.277	471.836	261.849	307.404					97.5221	108.967	60.4723	70.9929
	875.831	407.505	168.981	421.452					202.267	94.1106	39.0251	97.3316
	444.41	236.708	549.864	200.047					102.634	54.6662	126.987	46.1995
	415.179	502.03	347.782	253.555					95.8829	115.941	80.318	58.5569
	212.511	370.337	328.955	538.858					49.078	85.5269	75.97	124.446
	374.556	449.468	219.43	373.783					86.5012	103.802	50.6759	86.3227
	332.143	198.211	288.329	333.117					76.7062	45.7755	66.5877	76.9312
	276.696	210.093	278.599	440.933					63.9011	48.5196	64.3406	101.831
	434.33	376.99	432.21	1068.75					100.306	87.0634	99.8161	246.821
	233.296	360	358.35	707.544					53.8782	83.1396	82.7586	163.403
	405.431	539.631	440.114	310.259					93.6316	124.624	101.641	71.6523
	328.573	451.384	325.402	453.304					75.8818	104.244	75.1495	104.688
	466.882	419.273	259.027	319.308					107.823	96.8283	59.8206	73.7421
	467.849	171.939	426.508	386.002					108.047	39.7082	98.4992	89.1446
	582.599	194.201	604.377	502.573					134.547	44.8494	139.577	116.066
	330.937	393.48	596.836	524.071					76.4277	90.8716	137.835	121.031
	490.65	436.608	280.334	291.583					113.312	100.832	64.7413	67.3392
	942.452	648.663	841.659	306.531					217.653	149.804	194.376	70.7913
	328.961	414.889	416.335	287.555					75.9714	95.8159	96.1498	66.4089
	179.478	427.691	536.044	329.473					41.4493	98.7724	123.796	76.0896
	1197.08	573.129	556.643	289.417					276.458	132.36	128.553	66.839
	474.128	216.228	420.626	615.246					109.497	49.9364	97.1408	142.087
	452.607	439.239	282.728	531.782					104.527	101.439	65.2942	122.812
	221.392	328.847	319.392	541.871					51.129	75.9451	73.7615	125.142
	339.424	299.958	265.225	667.286					78.3877	69.2733	61.252	154.105
	368.404	362.232	417.311	702.085					85.0805	83.6551	96.3752	162.142
	608.788	294.458	287.065	558.609					140.596	68.0031	66.2958	129.007
	443.316	408.776	355.08	258.428					102.381	94.4041	82.0034	59.6822
	281.152	548.88	360.723	513.776					64.9302	126.76	83.3066	118.653
	868.603	726.97	617.813	498.407					200.598	167.889	142.68	115.104
	387.694	420.768	424.632	207.397					89.5354	97.1736	98.066	47.897
	381.6	554.582	330.465	353.353					88.128	128.077	76.3187	81.6046
	455.344	253.065	556.474	484.506					105.159	58.4437	128.514	111.893
	274.044	307.118	300.228	337.233					63.2887	70.9269	69.3357	77.8817
	401.734	394.085	556.474	726.788					92.7778	91.0113	128.514	167.847
	613.098	453.606	300.228	663.355					141.591	104.757	69.3357	153.197
	1135.02	367.541	651.509	435.415					262.125	84.8812	150.462	100.556
	265.127	579.494	414.233	684.64					61.2293	133.83	95.6644	158.113
	565.167	1041.51	851.674	1548.5					130.522	240.53	196.689	357.616
	849.16	321.138	400.329	357.497					196.108	74.1647	92.4533	82.5616
	234.054	451.275	552.989	353.894					54.0532	104.219	127.709	81.7295
	1118.05	436.317	352.306	456.14					258.206	100.765	81.3628	105.343
	420.457	208.327	299.44	295.178					97.1018	48.1118	69.1537	68.1694
	310.566	800.163	386.416	516.137					71.7232	184.792	89.2402	119.198
	288.247	778.866	1394.36	410.492					66.5687	179.874	322.019	94.8004
	413.17	278.288	298.926	370.635					95.4189	64.2688	69.035	85.5957
	325.973	433.428	330.889	488.842					75.2813	100.097	76.4166	112.895
	1050.85	302.339	343.845	966.816					242.687	69.8232	79.4087	223.28
	965.147	290.948	762.674	290.102					222.894	67.1925	176.135	66.9971
	282.634	302.27	256.45	407.599					65.2725	69.8073	59.2254	94.1323
	729.507	428.041	235.933	630.227					168.475	98.8533	54.4872	145.547
	551.386	363.032	672.348	378.102					127.339	83.8399	155.274	87.3202
	526.475	280.174	338.626	334.636					121.586	64.7043	78.2034	77.282
	255.769	1350.06	199.048	355.285					59.0682	311.788	45.9688	82.0507
	307.368	340.32	302.713	630.446					70.9846	78.5947	69.9096	145.597
	245.81	329.155	309.2	891.718					56.7682	76.0162	71.4077	205.936
	1543.1	588.484	392.479	265.706					356.369	135.907	90.6404	61.3631
	453.311	490.846	492.494	647.342					104.689	113.358	113.738	149.499
	405.942	673.718	436.061	1058.86					93.7496	155.591	100.705	244.536
	699.565	203.244	512.206	343.034					161.56	46.9379	118.291	79.2214
	552.426	277.968	263.368	231.258					127.579	64.1949	60.8231	53.4075
	246.437	463.928	480.454	624.226					56.913	107.141	110.958	144.161
	228.367	308.948	302.217	374.061					52.7399	71.3495	69.795	86.3869
	440.597	275.559	704.559	447.012					101.753	63.6385	162.713	103.234
	250.439	192.608	566.532	484.433					57.8372	44.4816	130.837	111.877
	353.534	584.106	349.593	289.805					81.6464	134.895	80.7362	66.9286
	574.812	317.606	597.74	786.52					132.749	73.349	138.044	181.642
	1013.18	633.004	343.176	265.792					233.987	146.188	79.2542	61.3829
	395.603	598.163	343.469	293.977					91.3619	138.142	79.3219	67.8921
	397.705	587.826	580.263	304.823					91.8474	135.755	134.008	70.3969
	446.418	328.647	634.593	414.341					103.097	75.8989	146.555	95.6893
	168.531	457.813	379.829	393.954					38.9211	105.729	87.719	90.9811
	265.132	470.763	780.631	201.665					61.2305	108.72	180.282	46.5732
	667.036	465.906	708.779	320.275					154.048	107.598	163.688	73.9654
	276.598	642.463	361.79	306.49					63.8785	148.373	83.553	70.7818
	346.655	260.543	614.447	301.683					80.0577	60.1707	141.902	69.6717
	314.173	246.32	650.355	404.271					72.5562	56.886	150.195	93.3637
	284.202	1191.37	723.234	339.123					65.6346	275.138	167.026	78.3182
	764.647	244.591	417.033	278.601					176.59	56.4867	96.311	64.3411
	295.577	628.502	938.302	279.777					68.2616	145.148	216.695	64.6127
	517.472	798.371	743.625	1036.5					119.507	184.379	171.735	239.373
	288.151	480.519	441.449	249.365					66.5466	110.973	101.95	57.5892
	330.239	991.691	512.881	496.935					76.2665	229.025	118.446	114.764
	362.571	479.386	396.54	575.627					83.7334	110.711	91.5783	132.937
	336.275	548.971	482.455	293.658					77.6605	126.781	111.42	67.8184
	903.656	312.295	706.218	403.015					208.693	72.1225	163.096	93.0737
	423.679	366.189	255.367	394.608					97.8459	84.5689	58.9753	91.1321
	463.851	551.274	959.677	525.673					107.123	127.313	221.631	121.401
	689.207	314.646	346.423	1165.92					159.168	72.6654	80.0041	269.261
	511.484	407.514	376.503	330.858					118.124	94.1127	86.9509	76.4095
	334.019	333.884	839.702	835.478					77.1395	77.1083	193.924	192.948
	570.387	359.001	202.414	544.957					131.727	82.9089	46.7462	125.854
	481.941	315.782	1156.39	954.025					111.301	72.9278	267.06	220.326
	437.306	586.063	466.48	546.98					100.993	135.347	107.73	126.321
	738.409	675.85	274.889	890.186					170.531	156.083	63.4838	205.583
	295.155	397.722	224.796	1048.64					68.1641	91.8513	51.9152	242.177
	496.215	970.446	911.232	424.476					114.598	224.118	210.443	98.0299
	358.222	349.963	398.895	687.999					82.729	80.8217	92.1222	158.889
	615.564	556.505	376.202	526.785					142.16	128.521	86.8814	121.658
	244.806	306.538	673.565	499.38					56.5363	70.7929	155.555	115.329
	837.255	260.619	376.065	437.856					193.359	60.1882	86.8497	101.12
	499.043	605.036	555.514	309.232					115.251	139.729	128.292	71.4151
	829.261	482.063	656.015	1078.21					191.512	111.329	151.502	249.006
	361.343	514.366	302.181	923.094					83.4498	118.789	69.7867	213.182
	548.385	439.082	608.876	764.638					126.646	101.403	140.616	176.588
	872.122	1047.74	455.531	826.672					201.411	241.969	105.202	190.914
	683.536	856.78	328.859	622.427					157.858	197.868	75.9478	143.745
	767.124	605.441	287.455	244.042					177.162	139.823	66.3858	56.3599
	516.805	264.019	301.522	764.262					119.353	60.9735	69.6345	176.501
	472.84	988.747	349.835	332.747					109.199	228.345	80.7921	76.8457
	166.791	912.96	509.542	1086.54					38.5193	210.842	117.675	250.929
	802.925	630.396	199.688	344.352					185.43	145.586	46.1166	79.5258
	714.406	392.021	340.053	200.931					164.987	90.5347	78.533	46.4037
	260.502	342.068	704.45	597.693					60.1612	78.9984	162.688	138.033
	451.244	824.749	959.592	749.411					104.212	190.47	221.611	173.072
	363.663	576.407	267.206	376.838					83.9856	133.117	61.7095	87.0283
	448.231	786.009	484.79	352.429					103.516	181.524	111.959	81.3912
	604.272	460.217	1041.12	730.027					139.553	106.284	240.439	168.595
	471.286	714.487	322.558	907.544					108.84	165.006	74.4926	209.591
	284.404	291.346	342.827	408.752					65.6812	67.2844	79.1736	94.3986
	990.795	219.737	301.842	746.829					228.818	50.7468	69.7084	172.475
	405.325	239.789	278.246	893.711					93.6071	55.3777	64.2591	206.397
	246.544	721.662	365.41	185.689					56.9377	166.663	84.389	42.8837
	458.065	1201.29	328.635	1050.43					105.787	277.43	75.8961	242.591
	224.713	340.233	543.939	737.43					51.896	78.5746	125.619	170.305
	726.733	614.293	273.381	1193.29					167.834	141.867	63.1355	275.582
	385.859	662.85	796.469	435.641					89.1116	153.081	183.939	100.608
	371.903	397.708	1234.55	752.439					85.8886	91.848	285.11	173.771
	682.287	766.576	502.495	1067.53					157.57	177.036	116.048	246.54
	970.344	466.475	383.221	295.785					224.095	107.729	88.5024	68.3096
	258.719	282.989	689.332	765.337					59.7495	65.3544	159.197	176.75
	500.762	245.427	409.178	431.023					115.648	56.6798	94.497	99.5419
	193.97	639.724	775.706	930.318					44.7961	147.74	179.144	214.851
	433.927	582.693	243.699	1117.02					100.213	134.569	56.2807	257.969
	509.684	627.329	708.412	772.679					117.708	144.878	163.603	178.445
	240.443	348.005	800.189	449.99					55.5287	80.3695	184.798	103.922
	319.785	542.265	545.2	475.638					73.8522	125.233	125.91	109.845
	375.64	394.992	421.743	531.193					86.7516	91.2208	97.3988	122.676
	218.049	634.62	404.051	931.284					50.357	146.561	93.3129	215.074
	247.11	536.134	436.16	245.672					57.0684	123.817	100.728	56.7363
	210.2	447.292	682.373	609.814					48.5443	103.299	157.59	140.833
	535.772	943.226	619.44	493.575					123.733	217.832	143.056	113.988
	554.299	550.262	523.053	724.536					128.012	127.079	120.796	167.327
	195.51	256.231	410.396	650.199					45.1517	59.1749	94.7783	150.159
	275.737	699.062	353.894	303.363					63.6796	161.444	81.7295	70.0597
	354.539	490.933	900.541	443.754					81.8785	113.378	207.974	102.482
	550.625	558.9	399.809	1007.38					127.163	129.074	92.3333	232.648
	472.514	686.906	512.781	1367.42					109.124	158.636	118.423	315.798
	275.687	472.403	703.319	376.425					63.6681	109.098	162.427	86.9329
	351.12	579.995	285.608	394.661					81.0889	133.946	65.9593	91.1444
	353.088	565.952	447.299	494.81					81.5434	130.703	103.301	114.273
	200.108	393.221	922.849	924.248					46.2136	90.8118	213.126	213.449
	869.595	558.618	649.954	1188.17					200.827	129.009	150.103	274.401
	829.128	541.912	288.751	568.918					191.482	125.151	66.6851	131.388
	361.134	284.113	860.952	534.853					83.4015	65.614	198.831	123.521
	444.209	591.096	764.274	350.412					102.587	136.51	176.504	80.9253
	699.035	218.768	941.253	284.368					161.438	50.523	217.376	65.6729
	677.398	599.72	646.021	861.386					156.441	138.501	149.194	198.931
means	433.006	457.1	466.76	500.175					100	105.564	107.795	115.512

## Sheet: Figure 2D
raw data axonal length (pixel)													normalized axonal length (%)
WT siRNA ctrl	WT siRNA ctrl Sema3E		WT siRNA CRMP1 Ctrl	WT siRNA CRMP1 Sema3E	WT siRNA CRMP2 Ctrl	WT siRNA CRMP2 Sema3E	WT siRNA CRMP4 Ctrl	WT siRNA CRMP4 Sema3E					WT siRNA ctrl	WT siRNA ctrl Sema3E	WT siRNA CRMP1 Ctrl	WT siRNA CRMP1 Sema3E	WT siRNA CRMP2 Ctrl	WT siRNA CRMP2 Sema3E	WT siRNA CRMP4 Ctrl	WT siRNA CRMP4 Sema3E
408.73	146.972		477.413	659.726	322.572	304.274	253.096	232.319					94.3935	33.9422	104.444	144.329	69.1087	65.1885	50.6015	46.4475
199.657	216.611		387.95	586.625	344.99	376.732	289.545	615.457					46.1095	50.0249	84.8721	128.336	73.9116	80.7121	57.8887	123.048
187.425	335.306		219.063	539.366	284.275	265.3	334.455	373.576					43.2846	77.4367	47.9246	117.997	60.9038	56.8386	66.8675	74.689
176.086	608.943		240.917	336.409	624.529	541.744	372.314	265.46					40.6659	140.631	52.7056	73.5964	133.801	116.065	74.4367	53.0734
303.25	283.362		446.944	234.993	237.911	439.045	258.279	638.001					70.0336	65.4406	97.7782	51.4096	50.9707	94.0622	51.6377	127.555
495.807	656.68		195.379	700.84	506.807	333.41	228.037	214.833					114.503	151.656	42.7432	153.323	108.58	71.4306	45.5914	42.9515
306.285	252.147		320.85	432.302	489.826	452.187	463.849	203.791					70.7345	58.2317	70.1926	94.575	104.942	96.8777	92.7373	40.7439
319.991	259.876		350.994	256.585	393.783	627.204	306.212	232.228					73.8998	60.0167	76.7872	56.1333	84.3651	134.374	61.2209	46.4293
329.333	143.535		242.259	398.435	453.778	484.024	218.663	437.551					76.0573	33.1485	52.9992	87.1659	97.2186	103.699	43.7173	87.4795
232.116	513.047		303.816	290.669	841.322	204.636	269.339	165.105					53.6057	118.485	66.466	63.5899	180.247	43.8418	53.8489	33.0094
347.906	216.211		309.455	732.343	375.397	539.942	193.131	279.717					80.3466	49.9325	67.6997	160.215	80.426	115.679	38.6127	55.9238
319.572	184.476		407.415	358.835	365.169	320.46	315.576	238.565					73.8031	42.6035	89.1305	78.5026	78.2348	68.6562	63.0931	47.6963
435.319	711.918		324.201	284.408	260.55	695.324	214.195	359.742					100.534	164.413	70.9257	62.2201	55.8209	148.968	42.824	71.9232
296.432	767.025		306.895	1034.02	338.36	545.066	441.163	400.347					68.459	177.139	67.1396	226.212	72.4911	116.776	88.2017	80.0413
212.844	1484.94		162.01	366.721	376.628	217.594	417.91	239.44					49.1549	342.938	35.443	80.2278	80.6898	46.6179	83.5527	47.8712
179.499	238.91		310.167	775.024	161.257	392.25	438.012	399.995					41.4541	55.1747	67.8554	169.553	34.5481	84.0367	87.5717	79.971
337.875	268.51		307.79	449.714	503.078	472.967	404.524	299.118					78.03	62.0106	67.3354	98.3842	107.781	101.33	80.8764	59.8026
214.842	248.773		660.641	473.577	812.108	534.182	261.14	317.996					49.6163	57.4525	144.529	103.605	173.988	114.445	52.2097	63.5769
331.309	939.532		446.83	480.265	328.048	312.789	245.648	381.791					76.5136	216.979	97.7533	105.068	70.2819	67.0127	49.1124	76.3314
322.691	224.184		279.081	363.214	354.819	384.391	470.945	310.732					74.5234	51.7738	61.0547	79.4606	76.0174	82.3529	94.156	62.1246
295.581	398.016		365.533	352.269	475.487	263.738	318.945	475.375					68.2625	91.9192	79.9679	77.0661	101.87	56.5039	63.7666	95.0417
258.579	448.964		246.199	553.88	249.9	376.594	494.892	431.236					59.7171	103.685	53.8611	121.173	53.5392	80.6825	98.9437	86.217
214.523	310.746		370.957	387.634	644.159	270.924	537.706	447.002					49.5427	71.7647	81.1545	84.803	138.006	58.0435	107.503	89.3691
1055.12	471.035		525.587	518.802	391.204	535.234	269.772	389.154					243.673	108.782	114.983	113.499	83.8126	114.67	53.9355	77.8035
200.884	402.328		376.422	617.701	342.308	254.187	372.998	289.688					46.3928	92.915	82.3501	135.135	73.337	54.4577	74.5734	57.9173
208.359	447.73		475.884	317.84	216.172	353.366	408.626	478.57					48.1191	103.4	104.109	69.5341	46.3133	75.7061	81.6965	95.6804
140.101	529.831		328.376	677.162	373.402	363.493	332.24	390.537					32.3554	122.361	71.839	148.143	79.9986	77.8757	66.4247	78.08
199.118	523.545		264.429	562.538	566.745	442.85	754.223	195.71					45.985	120.909	57.8493	123.067	121.421	94.8774	150.792	39.1283
288.849	243.008		407.68	427.315	482.66	197.682	389.175	183.118					66.7078	56.1211	89.1884	93.484	103.406	42.3519	77.8077	36.6108
552.344	299.169		442.138	646.67	824.553	970.67	382.221	170.321					127.56	69.0911	96.7268	141.472	176.654	207.959	76.4174	34.0523
392	316.384		278.459	991.954	293.05	303.321	186.027	280.604					90.5298	73.0668	60.9187	217.01	62.7838	64.9843	37.1924	56.1011
243.359	525.84		561.415	384.011	456.559	275.876	515.417	369.2					56.2022	121.439	122.821	84.0104	97.8144	59.1044	103.047	73.8141
269.481	449.549		457.1	633.958	335.406	461.452	235.498	418.218					62.2349	103.82	100	138.691	71.8583	98.8627	47.0831	83.6143
276.828	268.225		255.564	906.15	346.259	370.246	403.005	425.403					63.9316	61.9448	55.9099	198.239	74.1834	79.3225	80.5727	85.0508
453.456	229.842		359.749	626.348	230.44	417.982	193.046	398.792					104.723	53.0805	78.7025	137.027	49.3701	89.5496	38.5957	79.7304
218.02	642.551		451.701	382.337	430.906	458.522	424.316	644.233					50.3503	148.393	98.8189	83.6441	92.3184	98.235	84.8334	128.801
262.462	372.69		281.519	593.364	235.168	373.761	783.966	1255.5					60.6139	86.0703	61.5881	129.811	50.383	80.0755	156.738	251.012
353.728	454.039		414.078	438.828	277.005	759.654	526.08	342.163					81.6912	104.857	90.5881	96.0027	59.3463	162.75	105.179	68.4086
251.369	316.626		551.956	313.736	573.051	371.395	259.657	345.769					58.052	73.1227	120.752	68.6362	122.772	79.5686	51.9132	69.1296
267.663	374.771		444.281	308.056	486.935	240.817	271.847	608.047					61.815	86.5509	97.1957	67.3936	104.322	51.5933	54.3503	121.567
423.201	279.43		472.207	732.966	440.847	607.195	213.036	257.222					97.7355	64.5325	103.305	160.351	94.4482	130.087	42.5923	51.4264
327.833	348.016		444.188	738.12	345.768	584.653	362.573	291.788					75.7109	80.372	97.1753	161.479	74.0782	125.258	72.4892	58.3371
286.324	692.115		373.102	679.846	338.132	346.664	478.091	217.658					66.1246	159.839	81.6238	148.73	72.4423	74.2702	95.5847	43.5163
254.707	392.663		570.844	297.317	563.522	896.753	419.239	439.805					58.8229	90.6829	124.884	65.0442	120.73	192.123	83.8184	87.9302
233.277	450.077		363.641	335.16	465.693	508.946	526.472	358.308					53.8738	103.942	79.554	73.3232	99.7713	109.038	105.257	71.6365
432.826	639.125		358.822	800.517	582.245	408.559	524.812	407.497					99.9583	147.602	78.4997	175.13	124.742	87.5308	104.926	81.4708
436.585	345.443		184.951	262.974	558.607	582.664	771.39	224.719					100.826	79.7778	40.4619	57.531	119.677	124.831	154.224	44.928
382.387	676.975		281.341	414.695	307.473	769.309	193.017	473.582					88.3098	156.343	61.5492	90.7231	65.8738	164.819	38.5899	94.6832
206.143	256.425		732.704	665.962	250.051	184.956	459.959	580.718					47.6074	59.2197	160.294	145.693	53.5716	39.6255	91.9595	116.103
376.181	669.614		515.9	312.758	303.667	542.321	551.965	434.191					86.8765	154.643	112.864	68.4223	65.0584	116.188	110.354	86.8078
263.389	228.253		263.095	467.2	508.294	603.037	333.938	448.127					60.828	52.7135	57.5575	102.21	108.898	129.196	66.7642	89.594
282.52	1022.81		220.066	202.04	420.618	329.3	217.917	295.789					65.2461	236.211	48.144	44.2004	90.1143	70.5501	43.5681	59.1371
232.11	596.486		383.101	296.982	402.215	749.19	447.843	275.042					53.6043	137.755	83.8113	64.971	86.1716	160.508	89.5372	54.9891
318.045	516.519		453.122	284.235	286.712	441.303	271.059	562.626					73.4504	119.287	99.1298	62.1823	61.4259	94.5459	54.1928	112.486
192.565	386.607		194.647	610.564	198.939	358.713	581.871	378.082					44.4716	89.2843	42.5831	133.574	42.6212	76.8516	116.333	75.5899
374.661	283.515		876.796	658.236	336.388	708.461	287.201	242.439					86.5255	65.4759	191.817	144.003	72.0687	151.783	57.4201	48.4708
245.639	327.074		1072.18	338.787	197.236	352.371	284.047	248.728					56.7287	75.5356	234.561	74.1167	42.2564	75.4929	56.7895	49.7282
231.374	1121.07		480.071	448.145	479.142	195.361	782.768	480.683					53.4343	258.904	105.025	98.041	102.653	41.8547	156.499	96.1029
375.929	184.624		586.453	519.671	406.47	519.636	493.556	778.425					86.8183	42.6377	128.299	113.689	87.0832	111.328	98.6766	155.63
446.783	540.713		398.512	595.534	341.301	1306.41	395.333	396.599					103.182	124.874	87.1827	130.285	73.1212	279.889	79.0389	79.292
266.33	405.791		222.642	467.483	479.531	422.259	540.458	192.118					61.5072	93.7148	48.7075	102.272	102.736	90.4659	108.054	38.4101
725.09	459.976		591.06	640.595	566.871	728.477	269.33	365.986					167.455	106.228	129.307	140.143	121.448	156.071	53.8471	73.1715
319.039	502.579		204.235	675.096	292.415	204.346	436.23	359.221					73.68	116.067	44.6806	147.691	62.6478	43.7796	87.2154	71.819
296.248	584.247		159.939	901.146	421.121	574.26	222.144	313.093					68.4165	134.928	34.99	197.144	90.2221	123.031	44.4132	62.5966
443.923	584.175		191.497	371.784	523.205	522.856	276.01	342.573					102.521	134.911	41.8939	81.3354	112.093	112.018	55.1826	68.4906
359.191	254.883		286.64	625.888	458.559	521.737	547.212	176.965					82.9528	58.8636	62.7084	136.926	98.2429	111.778	109.404	35.3806
473.593	267.308		327.509	685.349	206.109	1043.31	355.33	274.151					109.373	61.733	71.6494	149.934	44.1573	223.521	71.0411	54.811
422.277	878.135		471.836	620.938	261.849	242.273	307.404	473.924					97.5221	202.8	103.224	135.843	56.0992	51.9052	61.4592	94.7516
875.831	291.89		407.505	578.836	168.981	605.494	421.452	375.676					202.267	67.4101	89.1501	126.632	36.2029	129.723	84.2608	75.1089
444.41	761.778		236.708	537.384	549.864	421.441	200.047	309.752					102.634	175.928	51.7848	117.564	117.804	90.2906	39.9954	61.9287
415.179	771.901		502.03	225.187	347.782	645.486	253.555	330.475					95.8829	178.265	109.829	49.2643	74.5097	138.291	50.6932	66.0718
212.511	519.589		370.337	465.328	328.955	1178.44	538.858	378.518					49.078	119.996	81.0189	101.8	70.4762	252.471	107.734	75.6771
374.556	256.686		449.468	1079.85	219.43	392.569	373.783	517.782					86.5012	59.2799	98.3304	236.24	47.0113	84.105	74.7304	103.52
332.143	249.305		198.211	602.645	288.329	475.682	333.117	376.933					76.7062	57.5754	43.3628	131.841	61.7724	101.911	66.6	75.3602
276.696	730.174		210.093	331.607	278.599	549.627	440.933	285.106					63.9011	168.629	45.9622	72.5459	59.6878	117.754	88.1557	57.0012
434.33	478.275		376.99	1380.9	432.21	457.576	1068.75	490.376					100.306	110.454	82.4744	302.1	92.5978	98.0323	213.676	98.0408
233.296	340.703		360	439.241	358.35	354.207	707.544	239.583					53.8782	78.6831	78.7574	96.0931	76.7738	75.8862	141.459	47.8998
405.431	311.777		539.631	405.634	440.114	721.841	310.259	612.94					93.6316	72.0028	118.055	88.7408	94.2912	154.649	62.03	122.545
328.573	345.573		451.384	839.637	325.402	253.339	453.304	260.44					75.8818	79.8078	98.7496	183.688	69.715	54.276	90.629	52.0697
466.882	671.415		419.273	506.527	259.027	582.025	319.308	261.248					107.823	155.059	91.7246	110.813	55.4946	124.695	63.8392	52.2313
467.849	230.039		171.939	289.515	426.508	252.487	386.002	649.218					108.047	53.126	37.6152	63.3374	91.3762	54.0935	77.1733	129.798
582.599	388.954		194.201	1036.29	604.377	1048.93	502.573	517.614					134.547	89.8264	42.4855	226.709	129.483	224.725	100.479	103.487
330.937	447.903		393.48	667.353	596.836	916.204	524.071	540.799					76.4277	103.44	86.0819	145.997	127.868	196.29	104.777	108.122
490.65	677.226		436.608	329.226	280.334	516.767	291.583	234.568					113.312	156.401	95.517	72.025	60.0595	110.714	58.2962	46.8972
942.452	433.371		648.663	241.32	841.659	503.05	306.531	433.169					217.653	100.084	141.908	52.7937	180.319	107.775	61.2847	86.6034
328.961	849.662		414.889	266.27	416.335	314.036	287.555	210.546					75.9714	196.224	90.7656	58.2521	89.1967	67.2799	57.4908	42.0944
179.478	334.359		427.691	780.191	536.044	228.885	329.473	321.196					41.4493	77.218	93.5663	170.683	114.843	49.0369	65.8715	64.2167
1197.08	478.492		573.129	416.787	556.643	902.083	289.417	503.74					276.458	110.505	125.384	91.1808	119.257	193.265	57.8631	100.713
474.128	173.966		216.228	754.346	420.626	499.381	615.246	453.965					109.497	40.1763	47.3043	165.029	90.116	106.989	123.006	90.7612
452.607	325.937		439.239	317.475	282.728	411.232	531.782	388.966					104.527	75.273	96.0926	69.4542	60.5724	88.1034	106.319	77.7659
221.392	467.09		328.847	355.669	319.392	378.298	541.871	433.447					51.129	107.871	71.9421	77.81	68.4274	81.0476	108.336	86.659
339.424	478.512		299.958	435.604	265.225	788.713	667.286	997.849					78.3877	110.509	65.622	95.2974	56.8225	168.976	133.41	199.5
368.404	271.394		362.232	616.794	417.311	250.332	702.085	609.459					85.0805	62.6767	79.2457	134.936	89.4058	53.6318	140.368	121.849
608.788	875.215		294.458	499.184	287.065	969.399	558.609	612.883					140.596	202.125	64.4188	109.207	61.5016	207.687	111.683	122.534
443.316	255.726		408.776	171.075	355.08	535.169	258.428	304.618					102.381	59.0582	89.4282	37.4262	76.0733	114.656	51.6675	60.9022
281.152	701.098		548.88	460.459	360.723	428.922	513.776	302.142					64.9302	161.914	120.079	100.735	77.2822	91.8934	102.719	60.4072
868.603	349.953		726.97	279.766	617.813	456.26	498.407	368.521					200.598	80.8193	159.04	61.2046	132.362	97.7503	99.6464	73.6784
387.694	303.012		420.768	818.884	424.632	1216.62	207.397	235.912					89.5354	69.9786	92.0517	179.148	90.9743	260.651	41.4649	47.1659
381.6	579.058		554.582	473.635	330.465	531.218	353.353	573.546					88.128	133.73	121.326	103.617	70.7997	113.81	70.6458	114.669
455.344	245.052		253.065	255.337	556.474	728.547	484.506	290.734					105.159	56.5931	55.3632	55.8603	119.22	156.086	96.8672	58.1264
274.044	823.543		307.118	737.352	300.228	467.85	337.233	249.691					63.2887	190.192	67.1884	161.311	64.3216	100.233	67.423	49.9207
401.734	362.455		394.085	607.76	556.474	387.866	726.788	300.334					92.7778	83.7066	86.2142	132.96	119.22	83.0974	145.307	60.0457
613.098	616.39		453.606	325.467	300.228	341.195	663.355	281.13					141.591	142.351	99.2357	71.2026	64.3216	73.0985	132.624	56.2063
1135.02	443.96		367.541	417.426	651.509	611.874	435.415	520.977					262.125	102.53	80.4072	91.3206	139.581	131.09	87.0525	104.159
265.127	965.59		579.494	532.095	414.233	866.473	684.64	473.605					61.2293	222.997	126.776	116.407	88.7464	185.635	136.88	94.6878
565.167	722.639		1041.51	328.586	851.674	742.901	1548.5	549.564					130.522	166.889	227.852	71.885	182.465	159.161	309.591	109.874
849.16	403.736		321.138	278.554	400.329	617.867	357.497	320.826					196.108	93.2402	70.2556	60.9395	85.7675	132.373	71.4743	64.1427
234.054	517.553		451.275	619.883	552.989	450.863	353.894	297.469					54.0532	119.525	98.7257	135.612	118.474	96.5941	70.754	59.4729
1118.05	795.654		436.317	278.171	352.306	315.934	456.14	239.176					258.206	183.751	95.4534	60.8557	75.479	67.6865	91.196	47.8184
420.457	306.847		208.327	257.789	299.44	499.341	295.178	419.858					97.1018	70.8643	45.5758	56.3967	64.1528	106.98	59.0149	83.9422
310.566	793.95		800.163	1023.34	386.416	571.138	516.137	414.732					71.7232	183.358	175.052	223.877	82.7868	122.362	103.191	82.9173
288.247	678.754		778.866	799.086	1394.36	1207.39	410.492	604.262					66.5687	156.754	170.393	174.817	298.732	258.674	82.0696	120.81
413.17	407.767		278.288	568.767	298.926	1069.77	370.635	560.883					95.4189	94.1711	60.8813	124.43	64.0427	229.191	74.101	112.137
325.973	266.671		433.428	218.034	330.889	848.961	488.842	762.384					75.2813	61.5859	94.8213	47.6994	70.8905	181.884	97.7341	152.423
1050.85	693.272		302.339	586.18	343.845	213.349	966.816	745.687					242.687	160.107	66.1429	128.239	73.6663	45.7085	193.295	149.085
965.147	327.519		290.948	704.947	762.674	342.292	290.102	494.536					222.894	75.6384	63.6509	154.222	163.397	73.3335	58.0001	98.8725
282.634	269.601		302.27	992.553	256.45	643.511	407.599	574.951					65.2725	62.2626	66.1278	217.142	54.9425	137.867	81.4912	114.95
729.507	770.214		428.041	805.575	235.933	413.776	630.227	312.543					168.475	177.876	93.6428	176.236	50.5469	88.6485	126.001	62.4867
551.386	268.532		363.032	805.575	672.348	416.678	378.102	697.233					127.339	62.0157	79.4208	176.236	144.046	89.2702	75.5939	139.398
526.475	392.593		280.174	539.76	338.626	422.421	334.636	508.85					121.586	90.6668	61.2939	118.084	72.5481	90.5006	66.9037	101.734
255.769	230.376		1350.06	388.359	199.048	321.899	355.285	552.968					59.0682	53.2038	295.354	84.9616	42.6446	68.9645	71.0321	110.555
307.368	339.54		340.32	309.898	302.713	355.855	630.446	367.498					70.9846	78.4145	74.452	67.7966	64.854	76.2393	126.045	73.4738
245.81	366.534		329.155	946.388	309.2	447.009	891.718	567.711					56.7682	84.6486	72.0095	207.042	66.2438	95.7684	178.281	113.502
1543.1	615.191		588.484	187.852	392.479	361.721	265.706	769.537					356.369	142.074	128.743	41.0965	84.0857	77.4961	53.1226	153.853
453.311	517.446		490.846	642.672	492.494	1344.06	647.342	326.9					104.689	119.501	107.383	140.598	105.513	287.955	129.423	65.3571
405.942	227.591		673.718	330.796	436.061	710.119	1058.86	750.024					93.7496	52.5606	147.39	72.3685	93.4229	152.138	211.697	149.952
699.565	841.914		203.244	718.459	512.206	258.178	343.034	355.711					161.56	194.435	44.4638	157.178	109.736	55.3127	68.5827	71.1173
552.426	281.716		277.968	404.134	263.368	570.87	231.258	313.079					127.579	65.0605	60.8113	88.4127	56.4247	122.305	46.2354	62.5938
246.437	281.056		463.928	470.636	480.454	799.812	624.226	411.84					56.913	64.908	101.494	102.961	102.934	171.354	124.801	82.3391
228.367	432.344		308.948	346.858	302.217	485.821	374.061	422.573					52.7399	99.847	67.5888	75.8824	64.7478	104.084	74.786	84.485
440.597	388.101		275.559	312.548	704.559	871.446	447.012	516.124					101.753	89.6294	60.2842	68.3763	150.947	186.701	89.3711	103.189
250.439	441.684		192.608	377.241	566.532	535.475	484.433	727.235					57.8372	102.004	42.137	82.5293	121.375	114.722	96.8526	145.396
353.534	454.328		584.106	365.28	349.593	667.521	289.805	712.655					81.6464	104.924	127.785	79.9126	74.8977	143.011	57.9407	142.481
574.812	865.943		317.606	661.598	597.74	439.858	786.52	1063.04					132.749	199.984	69.4829	144.738	128.061	94.2363	157.249	212.532
1013.18	1027.66		633.004	1132.49	343.176	1095.3	265.792	969.585					233.987	237.332	138.483	247.755	73.5229	234.66	53.1398	193.849
395.603	927.281		598.163	266.828	343.469	275.766	293.977	293.324					91.3619	214.149	130.861	58.3741	73.5857	59.0808	58.7748	58.6442
397.705	611.315		587.826	591.642	580.263	459.824	304.823	774.123					91.8474	141.179	128.599	129.434	124.317	98.5139	60.9432	154.77
446.418	152.049		328.647	1146.46	634.593	954.749	414.341	229.221					103.097	35.1147	71.8983	250.812	135.957	204.548	82.8391	45.8281
168.531	615.357		457.813	316.184	379.829	701.231	393.954	873.789					38.9211	142.113	100.156	69.1718	81.3756	150.234	78.7632	174.697
265.132	403.926		470.763	772.89	780.631	561.863	201.665	438.023					61.2305	93.2841	102.989	169.086	167.244	120.375	40.3189	87.5739
667.036	374.992		465.906	286.032	708.779	484.841	320.275	658.287					154.048	86.6019	101.927	62.5754	151.851	103.874	64.0325	131.611
276.598	387.14		642.463	470.893	361.79	631.105	306.49	492.136					63.8785	89.4074	140.552	103.018	77.5108	135.21	61.2765	98.3927
346.655	907.462		260.543	486.063	614.447	779.146	301.683	449.57					80.0577	209.572	56.9992	106.336	131.641	166.926	60.3154	89.8825
314.173	498.203		246.32	383.206	650.355	491.214	404.271	408.687					72.5562	115.057	53.8876	83.8342	139.334	105.239	80.8259	81.7087
284.202	389.839		1191.37	667.39	723.234	362.175	339.123	520.752					65.6346	90.0308	260.636	146.005	154.948	77.5933	67.8008	104.114
764.647	991.329		244.591	563.203	417.033	303.441	278.601	419.36					176.59	228.941	53.5093	123.212	89.3463	65.01	55.7007	83.8426
295.577	596.405		628.502	593.17	938.302	730.3	279.777	1432.62					68.2616	137.736	137.498	129.768	201.024	156.461	55.9358	286.424
517.472	481.657		798.371	231.331	743.625	512.278	1036.5	247.554					119.507	111.236	174.66	50.6084	159.316	109.752	207.228	49.4934
288.151	388.268		480.519	388.621	441.449	268.866	249.365	564.265					66.5466	89.6679	105.123	85.0189	94.5772	57.6026	49.8555	112.813
330.239	360.724		991.691	351.323	512.881	591.225	496.935	404.603					76.2665	83.3068	216.953	76.8592	109.881	126.666	99.3522	80.8922
362.571	1184.09		479.386	943.959	396.54	348.796	575.627	430.541					83.7334	273.457	104.876	206.511	84.9558	74.727	115.085	86.078
336.275	264.768		548.971	237.81	482.455	434.993	293.658	647.856					77.6605	61.1464	120.099	52.0259	103.362	93.194	58.711	129.526
903.656	316.855		312.295	801.284	706.218	479.163	403.015	157.932					208.693	73.1756	68.321	175.297	151.302	102.657	80.5747	31.5753
423.679	607.229		366.189	329.903	255.367	271.371	394.608	294.084					97.8459	140.236	80.1114	72.1731	54.7105	58.1392	78.8939	58.7962
463.851	278.284		551.274	477.458	959.677	333.345	525.673	335.486					107.123	64.2679	120.603	104.454	205.604	71.4167	105.098	67.0737
689.207	272.612		314.646	319.81	346.423	369.071	1165.92	601.638					159.168	62.9579	68.8353	69.9651	74.2186	79.0707	233.102	120.285
511.484	713.873		407.514	698.664	376.503	350.736	330.858	533.073					118.124	164.864	89.1521	152.847	80.663	75.1426	66.1484	106.577
334.019	649.638		333.884	281.838	839.702	274.478	835.478	1037.98					77.1395	150.03	73.044	61.6579	179.9	58.8049	167.037	207.523
570.387	618.616		359.001	545.043	202.414	759.098	544.957	448.632					131.727	142.865	78.5389	119.239	43.3657	162.631	108.953	89.6949
481.941	351.34		315.782	628.406	1156.39	361.67	954.025	675.496					111.301	81.1397	69.0838	137.477	247.748	77.4851	190.738	135.052
437.306	772.519		586.063	566.926	466.48	516.327	546.98	381.329					100.993	178.408	128.213	124.027	99.9399	110.619	109.358	76.2391
738.409	253.909		675.85	403.655	274.889	849.889	890.186	581.332					170.531	58.6386	147.856	88.3079	58.8929	182.082	177.975	116.226
295.155	396.094		397.722	953.146	224.796	768.116	1048.64	461.724					68.1641	91.4753	87.0099	208.52	48.1609	164.563	209.655	92.3124
496.215	1278.34		970.446	610.682	911.232	759.341	424.476	782.565					114.598	295.223	212.305	133.599	195.225	162.683	84.8654	156.458
358.222	476.609		349.963	421.678	398.895	1240.42	687.999	709.81					82.729	110.07	76.5616	92.2508	85.4603	265.751	137.552	141.912
615.564	272.093		556.505	287.254	376.202	775.649	526.785	304.915					142.16	62.8381	121.747	62.8428	80.5985	166.177	105.32	60.9616
244.806	570.43		306.538	584.858	673.565	622.249	499.38	887.751					56.5363	131.737	67.0615	127.95	144.306	133.312	99.841	177.488
837.255	315.913		260.619	962.462	376.065	652.452	437.856	195.062					193.359	72.958	57.0158	210.558	80.5692	139.783	87.5405	38.9987
499.043	513.938		605.036	579.253	555.514	438.421	309.232	1027.6					115.251	118.691	132.364	126.724	119.015	93.9285	61.8247	205.448
829.261	307.817		482.063	831.654	656.015	1237.04	1078.21	299.945					191.512	71.0883	105.461	181.942	140.546	265.027	215.566	59.968
361.343	1265.15		514.366	1100.08	302.181	324.986	923.094	475.004					83.4498	292.178	112.528	240.665	64.7401	69.6259	184.554	94.9675
548.385	669.033		439.082	394.215	608.876	335.193	764.638	627.744					126.646	154.509	96.0583	86.2427	130.447	71.8126	152.874	125.505
872.122	398.879		1047.74	549.613	455.531	692.542	826.672	584.204					201.411	92.1185	229.215	120.239	97.5942	148.372	165.276	116.8
683.536	245.542		856.78	637.628	328.859	477.407	622.427	698.451					157.858	56.7063	187.438	139.494	70.4556	102.281	124.442	139.641
767.124	671.779		605.441	809.882	287.455	627.176	244.042	915.336					177.162	155.143	132.453	177.178	61.5851	134.368	48.7913	183.003
516.805	1047.22		264.019	1138.26	301.522	1616.28	764.262	525.469					119.353	241.848	57.7596	249.017	64.5989	346.277	152.799	105.057
472.84	1038.02		988.747	809.754	349.835	296.347	332.747	771.556					109.199	239.723	216.309	177.15	74.9496	63.4902	66.5261	154.257
166.791	825.478		912.96	329.719	509.542	717.238	1086.54	665.757					38.5193	190.639	199.729	72.1329	109.166	153.663	217.231	133.105
802.925	808.669		630.396	361.881	199.688	922.484	344.352	449.873					185.43	186.757	137.912	79.169	42.7817	197.635	68.8463	89.9431
714.406	419.922		392.021	232.301	340.053	754.516	200.931	983.122					164.987	96.9782	85.7627	50.8206	72.8539	161.649	40.1721	196.555
260.502	367.397		342.068	310.514	704.45	613.152	597.693	445.602					60.1612	84.8479	74.8345	67.9314	150.923	131.363	119.497	89.0892
451.244	327.622		824.749	889.291	959.592	453.684	749.411	1174.4					104.212	75.6621	180.431	194.551	205.586	97.1985	149.83	234.797
363.663	925.116		576.407	293.531	267.206	489.08	376.838	799.539					83.9856	213.649	126.101	64.216	57.2469	104.782	75.3412	159.852
448.231	490.951		786.009	1027.56	484.79	496.416	352.429	687.389					103.516	113.382	171.956	224.801	103.863	106.353	70.4611	137.43
604.272	672.384		460.217	600.797	1041.12	416.81	730.027	464.135					139.553	155.283	100.682	131.437	223.051	89.2985	145.954	92.7945
471.286	698.335		714.487	188.463	322.558	640.329	907.544	1110.51					108.84	161.276	156.309	41.2302	69.1057	137.186	181.445	222.024
284.404	509.172		291.346	1050.17	342.827	936.302	408.752	1397.07					65.6812	117.59	63.738	229.747	73.4482	200.596	81.7217	279.317
990.795	959.916		219.737	477.8	301.842	722.851	746.829	496.252					228.818	221.686	48.072	104.529	64.6674	154.866	149.313	99.2156
405.325	676.083		239.789	627.15	278.246	645.966	893.711	351.712					93.6071	156.137	52.4588	137.202	59.6122	138.393	178.68	70.3177
246.544	666.986		721.662	713.105	365.41	897.588	185.689	550.299					56.9377	154.036	157.878	156.006	78.2864	192.302	37.1248	110.021
458.065	502.205		1201.29	1513.78	328.635	861.232	1050.43	979.926					105.787	115.981	262.807	331.17	70.4076	184.513	210.013	195.916
224.713	517.849		340.233	444.707	543.939	1051.89	737.43	969.242					51.896	119.594	74.433	97.2889	116.535	225.36	147.434	193.78
726.733	290.653		614.293	329.808	273.381	854.263	1193.29	633.737					167.834	67.1244	134.389	72.1523	58.5699	183.02	238.574	126.703
385.859	851.051		662.85	800.584	796.469	338.165	435.641	794.795					89.1116	196.545	145.012	175.144	170.638	72.4494	87.0977	158.903
371.903	632.027		397.708	301.929	1234.55	670.61	752.439	370.776					85.8886	145.962	87.0069	66.0532	264.492	143.673	150.435	74.1292
682.287	717.321		766.576	764.281	502.495	337.718	1067.53	765.626					157.57	165.661	167.704	167.202	107.656	72.3536	213.432	153.072
970.344	589.831		466.475	291.927	383.221	733.448	295.785	347.996					224.095	136.218	102.051	63.8651	82.1023	157.136	59.1363	69.5748
258.719	539.703		282.989	251.632	689.332	1104.98	765.337	1047.31					59.7495	124.641	61.9097	55.0497	147.684	236.734	153.014	209.389
500.762	244.785		245.427	639.241	409.178	394.192	431.023	245.215					115.648	56.5315	53.6922	139.847	87.6634	84.4527	86.1744	49.0258
193.97	479.062		639.724	847.324	775.706	1177.56	930.318	784.011					44.7961	110.636	139.953	185.37	166.189	252.284	185.998	156.747
433.927	241.18		582.693	677.948	243.699	421.429	1117.02	222.303					100.213	55.6989	127.476	148.315	52.2107	90.2881	223.326	44.445
509.684	648.768		627.329	348.905	708.412	373.698	772.679	844.095					117.708	149.829	137.241	76.3302	151.772	80.062	154.482	168.76
240.443	382.594		348.005	375.057	800.189	627.667	449.99	398.288					55.5287	88.3576	76.1333	82.0515	171.435	134.473	89.9664	79.6297
319.785	551.903		542.265	430.158	545.2	611.634	475.638	372.815					73.8522	127.458	118.632	94.106	116.805	131.038	95.0942	74.5369
375.64	855.994		394.992	385.58	421.743	1103.8	531.193	607.479					86.7516	197.686	86.4127	84.3536	90.3553	236.481	106.201	121.453
218.049	462.668		634.62	314.125	404.051	1053.47	931.284	225.742					50.357	106.85	138.836	68.7213	86.565	225.697	186.191	45.1326
247.11	286.555		536.134	413.527	436.16	1208.89	245.672	900.564					57.0684	66.178	117.29	90.4676	93.4441	258.996	49.1172	180.05
210.2	599.569		447.292	423.11	682.373	1317.93	609.814	350.417					48.5443	138.467	97.8544	92.5641	146.193	282.356	121.92	70.0588
535.772	458.95		943.226	1203.58	619.44	377.398	493.575	634.135					123.733	105.991	206.35	263.309	132.71	80.8547	98.6804	126.783
554.299	569.202		550.262	522.117	523.053	817.957	724.536	491.206					128.012	131.453	120.381	114.224	112.06	175.241	144.856	98.2068
195.51	485.281		256.231	324.747	410.396	1170.52	650.199	524.35					45.1517	112.072	56.0558	71.0451	87.9243	250.775	129.994	104.833
275.737	1265.27		699.062	482.009	353.894	701.518	303.363	638.719					63.6796	292.205	152.934	105.449	75.8192	150.295	60.6513	127.699
354.539	685.245		490.933	342.554	900.541	565.505	443.754	846.151					81.8785	158.253	107.402	74.9408	192.934	121.155	88.7197	169.171
550.625	886.955		558.9	408.698	399.809	323.851	1007.38	409.822					127.163	204.836	122.271	89.4111	85.6561	69.3827	201.405	81.9357
472.514	813.488		686.906	720.454	512.781	710.396	1367.42	378.805					109.124	187.87	150.275	157.614	109.86	152.197	273.389	75.7344
275.687	804.534		472.403	310.564	703.319	1212.82	376.425	1149.78					63.6681	185.802	103.348	67.9423	150.681	259.839	75.2586	229.875
351.12	899.314		579.995	772.53	285.608	426.075	394.661	602.237					81.0889	207.691	126.886	169.007	61.1894	91.2834	78.9045	120.405
353.088	569.898		565.952	631.615	447.299	245.054	494.81	263.519					81.5434	131.614	123.814	138.179	95.8305	52.501	98.9273	52.6853
200.108	1346.08		393.221	859.005	922.849	1033.13	924.248	751.217					46.2136	310.869	86.0252	187.925	197.714	221.34	184.785	150.191
869.595	688.928		558.618	229.627	649.954	967.187	1188.17	877.294					200.827	159.103	122.209	50.2357	139.248	207.213	237.551	175.397
829.128	1025.15		541.912	707.583	288.751	927.045	568.918	319.858					191.482	236.753	118.554	154.798	61.8628	198.613	113.744	63.9492
361.134	422.418		284.113	377.175	860.952	714.832	534.853	935.641					83.4015	97.5547	62.1556	82.5148	184.453	153.147	106.933	187.063
444.209	294.121		591.096	942.355	764.274	800.071	350.412	394.371					102.587	67.9253	129.314	206.16	163.74	171.409	70.0578	78.8465
699.035	359.702		218.768	299.222	941.253	559.107	284.368	734.035					161.438	83.0708	47.86	65.461	201.657	119.785	56.8537	146.756
677.398	747.873		599.72	843.33	646.021	937.05	861.386	520.346					156.441	172.716	131.201	184.496	138.405	200.756	172.217	104.033
433.006	521.133	Means	457.1	542.125	466.76	581.113	500.175	495.634					100	120.352	100	118.601	100	124.499	100	99.0921

## Sheet: Figure 2E 
raw data			normalized data
WT	KO		WT	KO
102.054	106.74		134.812	141.003
38.0416	26.7279		50.2527	35.3074
162.953	152.799		215.26	201.846
49.9411	209.238		65.9719	276.402
52.6274	75.6985		69.5205	99.9972
90.598	46.799		119.679	61.8212
45.8701	29.7279		60.5941	39.2704
94.0538	46.9706		124.244	62.0479
53.7279	60.2843		70.9742	79.6352
76.4558	56.9706		100.998	75.2578
78.5269	146.238		103.734	193.179
27.8995	161.711		36.8551	213.619
53.2843	38.0711		70.3882	50.2917
14.6569	439.529		19.3617	580.615
61.6985	448.718		81.5033	592.753
27.1421	55.7696		35.8545	73.6713
42.9706	58.6985		56.7639	77.5403
25.7279	90.598		33.9864	119.679
289.534	413.191		382.473	545.822
65.799	156.882		86.92	207.24
109.569	354.806		144.739	468.697
50.2843	22.4853		66.4252	29.7029
51.6985	95.2548		68.2934	125.831
57.0122	36.9706		75.3127	48.8379
68.4558	93.669		90.4297	123.736
75.9117	87.5269		100.279	115.622
126.912	47.6985		167.65	63.0094
248.309	69.598		328.014	91.9385
178.125	279.078		235.302	368.66
38.4853	57.6274		50.8388	76.1254
41.1421	55.5563		54.3484	73.3895
68.4558	65.7279		90.4297	86.8261
66.0416	48.4853		87.2405	64.0488
44.9706	66.4558		59.4059	87.7877
56.0416	193.196		74.0306	255.211
69.4558	209.752		91.7507	277.081
193.439	58.1127		255.531	76.7665
228.38	48.6274		301.688	64.2365
35.0416	111.569		46.2897	147.381
61.799	154.468		81.6361	204.051
51.3848	29.8995		67.879	39.497
25.6569	97.0122		33.8926	128.152
21.6569	45.8995		28.6086	60.6329
31.3848	53.5269		41.4591	70.7087
56.9411	72.1838		75.2188	95.3543
78.0833	43.2132		103.148	57.0844
37.5563	49.1127		49.6116	64.8776
81.1543	38.7279		107.204	51.1593
100.054	174.74		132.17	230.831
89.7696	139.368		118.585	184.104
70.2843	29.3137		92.8451	38.7232
44.0416	28.5563		58.1787	37.7227
58.9411	67.2548		77.8608	88.8432
48.7279	52.7696		64.3692	69.7083
23.7279	96.1838		31.3444	127.058
69.7401	299.894		92.1262	396.159
28.0711	122.669		37.0817	162.045
124.225	79.598		164.101	105.148
77.5563	247.995		102.451	327.6
68.1127	78.1127		89.9764	103.186
23.9706	78.2843		31.665	103.413
96.2548	436.534		127.152	576.659
40.0711	50.4558		52.9337	66.6518
71.2843	81.8701		94.1661	108.15
49.3137	38.2843		65.1431	50.5733
25.7279	23.3848		33.9864	30.8912
89.2843	188.338		117.944	248.793
76.5269	50.3553		101.092	66.519
84.1127	86.8823		111.112	114.771
133.297	41.9706		176.084	55.4429
44.9706	34.5563		59.4059	45.6486
53.6985	54.1838		70.9354	71.5764
71.9117	35.2132		94.9949	46.5164
105.598	68.2132		139.494	90.1092
26.7279	62.0416		35.3074	81.9565
44.6274	23.8995		58.9525	31.5711
204.936	79.598		270.719	105.148
318.676	116.326		420.969	153.666
40.4558	129.397		53.4418	170.933
110.196	62.799		145.568	82.9571
95.9117	117.64		126.699	155.401
84.3553	34.799		111.433	45.9693
55.9706	94.9117		73.9368	125.378
55.598	300.421		73.4446	396.855
32.4853	64.0416		42.9129	84.5985
23.7279	237.321		31.3444	313.499
111.782	349.191		147.663	461.279
178.125	140.711		235.302	185.878
128.569	34.1421		169.838	45.1015
42.799	17.1421		56.5372	22.6446
54.4853	36.8701		71.9747	48.7052
80.4975	161.054		106.337	212.751
78.4975	105.426		103.695	139.268
56.7696	30.5563		74.9923	40.3647
38.1421	32.9706		50.3855	43.5539
38.3848	68.6985		50.7061	90.7503
173.196	273.693		228.791	361.547
133.154	109.054		175.896	144.059
52.8701	47.1421		69.8411	62.2744
68.3553	146.681		90.2969	193.765
126.841	61.598		167.556	81.3706
22.8995	149.397		30.2501	197.352
312.664	148.326		413.027	195.938
35.6274	190.368		47.0636	251.474
58.9706	164.581		77.8998	217.41
38.6274	120.267		51.0265	158.872
117.912	84.2548		155.761	111.3
44.6274	178.309		58.9525	235.545
30.4853	30.9706		40.2709	40.912
49.5269	135.225		65.4247	178.632
111.74	50.8701		147.608	67.1991
56.8406	251.522		75.0861	332.259
30.4853	46.4558		40.2709	61.3678
27.0711	107.64		35.7607	142.191
15.6569	98.8112		20.6827	130.529
63.6985	141.154		84.1453	186.464
98.1838	97.7696		129.7	129.153
81.669	80.6274		107.884	106.508
45.6274	44.6274		60.2735	58.9525
31.3137	68.8406		41.3652	90.938
71.6985	49.1421		94.7133	64.9164
49.3137	156.024		65.1431	206.107
256.823	50.8701		339.262	67.1991
162.125	130.255		214.166	172.066
62.4558	349.534		82.5037	461.732
40.0711	46.3848		52.9337	61.274
46.2843	290.463		61.1413	383.7
180.965	91.2843		239.054	120.586
26.7279	269.291		35.3074	355.732
23.3848	114.74		30.8912	151.571
41.5563	82.3259		54.8956	108.752
34.5563	36.4558		45.6486	48.1579
87.9117	93.1838		116.131	123.095
21.1421	68.4558		27.9286	90.4297
65.0833	136.811		85.9746	180.727
115.539	65.1127		152.626	86.0135
123.255	53.0416		162.819	70.0676
33.799	270.522		44.6483	357.358
102.74	166.095		135.719	219.411
43.799	67.2843		57.8582	88.8821
53.0416	220.853		70.0676	291.745
86.9828	186.782		114.904	246.737
59.6985	50.4558		78.8613	66.6518
114.326	45.1127		151.024	59.5936
51.2132	60.0416		67.6523	79.3146
49.8701	27.3137		65.8781	36.0812
26.3848	105.569		34.8541	139.455
89.2843	47.5563		117.944	62.8216
34.799	77.1127		45.9693	101.865
125.468	66.6274		165.742	88.0144
19.0711	40.799		25.1928	53.8952
126.296	44.6985		166.837	59.0464
38.9706	78.5269		51.4799	103.734
52.3848	33.0416		69.2	43.6477
73.5685	251.522		97.1835	332.259
53.2843	120.267		70.3882	158.872
193.125	62.799		255.117	82.9571
72.2843	270.522		95.4871	357.358
56.6274	57.9706		74.8044	76.5788
68.5269	68.6985		90.5236	90.7503
102.498	53.0416		135.399	70.0676
78.6274	29.7279		103.866	39.2704
43.1421	60.3553		56.9904	79.729
41.9706	79.3848		55.4429	104.867
76.8701	116.326		101.545	153.666
59.1127	104.426		78.0875	137.947
37.5563	72.9411		49.6116	96.3547
34.1421	36.8701		45.1015	48.7052
69.6985	47.1421		92.0713	62.2744
64.5269	94.9117		85.2396	125.378
67.6274	74.7696		89.3354	98.7702
31.3137	54.1127		41.3652	71.4825
101.012	161.054		133.436	212.751
18.3137	34.1421		24.1923	45.1015
78.8406	19.6569		104.148	25.9666
59.8406	73.1127		79.049	96.5814
67.9411	47.5563		89.7497	62.8216
35.799	61.598		47.2902	81.3706
99.4975	97.7696		131.436	129.153
58.7696	64.0416		77.6343	84.5985
61.7696	61.3553		81.5972	81.05
52.8701	220.853		69.8411	291.745
72.2843	65.1127		95.4871	86.0135
29.3137	112.598		38.7232	148.741
82.4264	53.3848		108.885	70.521
47.5269	28.0711		62.7827	37.0817
122.711	127.054		162.1	167.837
49.1838	242.652		64.9715	320.541
31.3137	52.9411		41.3652	69.9348
66.0122	149.397		87.2017	197.352
69.3259	171.439		91.5791	226.469
80.0833	230.137		105.79	304.01
166.338	34.6274		219.732	45.7426
92.3553	40.3848		122.001	53.3481
257.563	81.5563		340.24	107.735
141.426	51.2132		186.823	67.6523
85.2843	50.8701		112.66	67.1991
48.8701	105.426		64.5571	139.268
49.6274	46.3848		65.5575	61.274
192.338	68.8406		254.077	90.938
25.3137	26.1421		33.4392	34.5335
20.3137	394.22		26.8343	520.762
72.5269	54.1838		95.8076	71.5764
80.6985	22.0711		106.602	29.1558
87.9117	99.2548		116.131	131.115
49.3137	49.5563		65.1431	65.4635
128.983	22.3137		170.385	29.4763
63.0122	37.7279		83.2387	49.8383
154.894	23.0711		204.614	30.4768
20.3137	46.4558		26.8343	61.3678
17.3137	269.291		22.8713	355.732
80.9411	156.024		106.923	206.107
205.983	154.782		272.102	204.466
89.9117	35.5563		118.773	46.9696
37.6985	427.073		49.7995	564.161
35.6274	215.238		47.0636	284.327
32.3137	80.6274		42.6862	106.508
112.983	28.2426		149.25	37.3083
34.3848	170.196		45.4221	224.828
127.054	145.368		167.837	192.03
17.0711	45.2843		22.5508	59.8203
64.8701	120.598		85.693	159.309
66.8701	39.9706		88.335	52.8009
58.598	126.882		77.4076	167.611
81.6274	236.806		107.829	312.819
75.7006	107.238		100	141.66

## Sheet:  Figure 2F
Culture 1					Culture 2					Culture 3						Pooled normalized data axonal length (%)
normalized data axonal length (%)					normalized data axonal length (%)					normalized data axonal length (%)						WT CtrL	WT Sema3E	KO CRMP4 CtrL	KO CRMP4 Sema3E
WT CtrL	WT Sema3E	KO CRMP4 CtrL	KO CRMP4 Sema3E		WT CtrL	WT Sema3E	KO CRMP4 CtrL	KO CRMP4 Sema3E		WT CtrL	WT Sema3E	KO CRMP4 CtrL	KO CRMP4 Sema3E			124.093	101.518	87.1865	56.8537
124.093	101.518	87.1865	56.8537		72.1997	132.077	250.06	114.258		110.146	91.1107	133.935	124.014			143.163	45.108	73.1543	51.8429
143.163	45.108	73.1543	51.8429		78.706	150.766	123.9	136.738		60.5873	114.916	104.231	94.6656			80.2481	84.8812	56.8893	80.1003
80.2481	84.8812	56.8893	80.1003		119.206	111.694	90.2094	123.879		59.4139	112.428	70.2472	88.0524			82.5444	98.6788	52.0564	112.096
82.5444	98.6788	52.0564	112.096		63.853	160.438	89.5078	82.0006		81.6777	63.6922	86.9465	185.918			145.922	94.6443	52.8834	118.588
145.922	94.6443	52.8834	118.588		149.701	120.078	42.4699	104.351		109.258	80.0672	61.5769	55.601			60.7957	94.5991	55.5261	154.866
60.7957	94.5991	55.5261	154.866		80.2939	86.1367	81.2522	63.7963		73.5241	94.7005	58.2991	63.9117			90.0904	148.47	107.848	77.4287
90.0904	148.47	107.848	77.4287		91.502	116.591	49.1477	77.6163		99.5596	100.076	102.199	109.023			91.2518	102.593	145.077	182.799
91.2518	102.593	145.077	182.799		73.7283	183.151	180.426	49.9155		75.3723	146.605	102.251	132.346			31.3433	119.703	140.691	153.893
31.3433	119.703	140.691	153.893		46.3228	111.695	165.047	148.666		46.8496	144.001	81.2899	122.423			100.777	66.2398	176.284	61.9027
100.777	66.2398	176.284	61.9027		116.247	79.3545	135.974	151.753		110.43	133.915	48.3819	76.7523			100.896	171.358	146.073	60.1242
100.896	171.358	146.073	60.1242		113.273	96.0766	82.8814	78.8128		90.4089	177.68	102.111	42.7258			108.744	122.651	80.1188	142.776
108.744	122.651	80.1188	142.776		82.7878	121.581	67.906	59.7396		84.0034	87.2612	83.3902	185.852			102.035	78.3745	112.116	64.5665
102.035	78.3745	112.116	64.5665		99.1126	157.114	44.4973	131.044		180.201	146.014	95.4767	79.4068			142.329	122.386	88.4363	105.481
142.329	122.386	88.4363	105.481		116.146	93.835	112.002	110.359		74.7185	82.2011	101.759	130.08			83.3839	93.4973	59.3174	124.512
83.3839	93.4973	59.3174	124.512		89.9183	126.25	99.421	104.883		106.51	106.289	46.6553	200.636			67.7538	92.9396	73.5068	73.6387
67.7538	92.9396	73.5068	73.6387		105.526	174.099	174.062	110.086		128.165	118.061	73.2149	164.437			79.1701	101.378	66.0292	101.558
79.1701	101.378	66.0292	101.558		74.6378	118.682	77.8887	50.1058		106.008	87.3543	80.2792	183.23			65.6642	83.9314	118.293	201.244
65.6642	83.9314	118.293	201.244		83.0108	167.84	127.906	64.5318		72.3323	99.9074	92.8146	75.3154			140.097	137.412	84.1529	106.787
140.097	137.412	84.1529	106.787		81.1145	135.292	127.011	99.3731		122.884	80.6078	60.0973	152.082			188.888	79.5179	120.347	58.4338
188.888	79.5179	120.347	58.4338		151.367	117.979	119.196	70.9792		84.2151	131.106	100.43	146.575			78.7121	108.016	187.104	144.51
78.7121	108.016	187.104	144.51		58.7298	110.484	61.0361	67.0077		76.2146	74.066	152.713	81.0872			138.489	113.257	96.9839	155.924
138.489	113.257	96.9839	155.924		115.182	128.391	138.849	84.7665		149.857	180.258	99.0424	29.5303			74.1606	93.2007	147.867	101.543
74.1606	93.2007	147.867	101.543		105.025	124.446	76.8261	70.104		75.4166	100.411	45.2025	82.4729			140.62	106.78	78.4479	98.4372
140.62	106.78	78.4479	98.4372		91.0058	114.067	101.578	57.2758		58.9646	112.205	80.313	114.495			124.239	99.1437	126.085	73.8994
124.239	99.1437	126.085	73.8994		61.8182	81.3126	79.4269	78.0243		80.0849	127.754	94.8316	89.5317			90.0591	76.811	62.1257	83.9788
90.0591	76.811	62.1257	83.9788		113.826	132.663	59.5082	96.21		152.197	113.065	48.3516	126.1			139.733	75.5475	115.777	110.565
139.733	75.5475	115.777	110.565		103.55	92.3564	120.076	87.9245		133.915	170.378	105.809	94.7379			99.3572	55.2821	145.289	63.6036
99.3572	55.2821	145.289	63.6036		89.6788	156.154	150.21	98.6453		128.002	105.934	112.6	102.056			134.171	74.4439	82.4366	114.802
134.171	74.4439	82.4366	114.802		105.503	107.527	109.043	67.6872		124.314	222.146	88.531	130.187			126.546	134.103	194.82	88.5889
126.546	134.103	194.82	88.5889		68.4532	138.479	84.2911	55.0058		118.657	103.08	61.106	97.275			104.387	68.7181	95.9787	128.772
104.387	68.7181	95.9787	128.772		84.8828	128.943	100.986	82.9972		84.9005	128.985	83.3201	86.3033			82.4954	102.015	120.284	89.2423
82.4954	102.015	120.284	89.2423		145.696	119.806	57.9963	76.9624		58.3145	134.131	83.6406	107.41			58.4144	142.051	214.514	118.488
58.4144	142.051	214.514	118.488		80.0553	109.201	109.111	91.8878		208.432	102.314	153.225	122.889			93.5453	60.1767	125.189	98
93.5453	60.1767	125.189	98		68.1056	160.51	69.6309	148.13		127.316	188.948	121.454	81.182			76.7706	86.6261	74.1709	91.5306
76.7706	86.6261	74.1709	91.5306		48.5896	169.726	49.549	146.801		103.094	134.161	103.098	64.1235			84.5457	93.4494	104.672	147.62
84.5457	93.4494	104.672	147.62		103.072	166.638	90.4265	109.571		60.47	90.9779	112.702	130.502			75.6267	101.861	125.547	89.8265
75.6267	101.861	125.547	89.8265		118.649	151.492	91.2602	112.846		83.4248	132.276	109.652	114.374			105.812	143.949	81.0362	70.1469
105.812	143.949	81.0362	70.1469		87.3014	93.4042	104.688	145.519		102.859	207.972	136.292	97.9236			70.9584	180.841	116.587	65.7357
70.9584	180.841	116.587	65.7357		54.1319	111.856	80.8866	103.858		99.8989	106.626	95.4727	79.8358			95.7437	156.513	155.762	108.465
95.7437	156.513	155.762	108.465		120.436	123.787	65.7117	93.4341		103.033	131.745	56.4442	104.658			106.722	86.7306	96.2679	157.441
106.722	86.7306	96.2679	157.441		75.2091	112.066	90.7226	68.1469		67.3451	139.477	114.564	90.4604			99.6775	188.119	86.9755	131.039
99.6775	188.119	86.9755	131.039		78.0322	92.2795	76.3833	121.49		103.145	104.815	118.698	69.1725			85.3682	91.1229	142.449	90.3325
85.3682	91.1229	142.449	90.3325		98.2454	107.089	76.5135	143.288		80.831	117.873	98.8032	104.452			81.0954	102.972	168.002	117.567
81.0954	102.972	168.002	117.567		101.835	157.403	77.7711	53.512		120.93	126.818	80.5974	99.2673			49.6498	155.418	101.692	75.1944
49.6498	155.418	101.692	75.1944		126.007	92.5012	53.2898	84.9164		120.26	115.165	125.675	88.8816			119.613	82.6779	59.2755	67.372
119.613	82.6779	59.2755	67.372		67.1518	162.007	112.774	75.5052		110.875	171.931	99.8144	76.5651			67.5757	66.1068	169.585	72.1029
67.5757	66.1068	169.585	72.1029		110.961	126.123	103.905	117.293		96.8735	128.022	89.6659	161.244			64.0979	85.2339	122.072	112.909
64.0979	85.2339	122.072	112.909		101.221	127.374	46.8606	128.971		78.7696	166.741	97.8256	94.6239			101.865	78.7001	60.4627	165.775
101.865	78.7001	60.4627	165.775		107.378	106.008	111.161	115.858		109.574	141.919	78.2664	174.872			90.9193	123.263	32.26	79.1268
90.9193	123.263	32.26	79.1268		104.97	166.111	73.9674	107.49		64.6479	103.434	125.322	75.417			131.121	79.6894	118.644	105.655
131.121	79.6894	118.644	105.655		100.431	142.607	106.886	82.9775		99.4596	116.308	105.09	66.6375			73.7405	183.466	41.4288	187.961
73.7405	183.466	41.4288	187.961		164.604	100.623	83.6816	109.088		85.4357	197.442	93.4918	151.087			186.223	111.489	32.8049	115.21
186.223	111.489	32.8049	115.21		73.7495	155.786	95.9678	119.968		154.577	99.2482	146.161	141.849			39.6311	88.4039	164.817	51.8124
39.6311	88.4039	164.817	51.8124		165.689	120.52	119.424	78.8753		127.049	154.911	126.016	197.342			96.2666	98.0855	48.4101	97.8106
96.2666	98.0855	48.4101	97.8106		95.789	176.642	115.797	106.021		65.164	187.238	117.661	127.189			90.6421	93.1335	54.5975	110.787
90.6421	93.1335	54.5975	110.787		96.227	144.298	113.332	142.144		134.4	120.699	106.003	160.66			119.214	117.684	70.4755	65.1756
119.214	117.684	70.4755	65.1756		153.14	133.533	85.926	69.0738		98.2991	89.0371	174.239	160.634			98.3567	77.9426	112.115	83.1406
98.3567	77.9426	112.115	83.1406		94.8962	156.205	109.124	132.609		166.073	113.176	167.311	119.25			110.647	94.5929	86.461	78.8571
110.647	94.5929	86.461	78.8571		92.8569	166.774	77.5184	108.287		175.027	120.986	69.1943	86.0769			108.223	110.837	95.7244	122.264
108.223	110.837	95.7244	122.264		80.2523	143.287	91.7429	94.5334		63.9106	135.582	125.6	106.817			132.999	135.981	61.6456	66.186
132.999	135.981	61.6456	66.186		105.489	135.135	118.179	150.945		52.9833	159.319	68.3983	86.1409			79.4672	98.6827	78.8373	87.6651
79.4672	98.6827	78.8373	87.6651		140.316	124.002	121.389	84.648		94.6933	131.548	92.8221	97.4122			82.3201	151.029	175.525	134.585
82.3201	151.029	175.525	134.585		103.885	151.818	104.65	183.355		87.3835	93.1323	132.52	143.031			131.558	127.038	88.7529	113.271
131.558	127.038	88.7529	113.271		100.999	172.608	127.561	76.7596		114.647	104.053	183.702	75.9118			85.5309	175.252	92.1063	197.429
85.5309	175.252	92.1063	197.429		97.5587	80.2795	157.044	89.998		89.3198	116.118	60.3161	72.6707			92.5287	120.484	71.0095	84.4889
92.5287	120.484	71.0095	84.4889		161.298	121.42	138.409	51.084		102.175	150.828	91.1279	119.18			71.9629	143.959	72.0881	188.129
71.9629	143.959	72.0881	188.129		120.615	174.795	83.9001	95.5839		56.9727	116.231	78.2665	94.4881			83.0572	128.73	90.4154	97.2766
83.0572	128.73	90.4154	97.2766		78.9203	124.157	129.056	105.878		58.2551	185.72	166.544	119.209			67.583	141.497	88.7989	51.1159
67.583	141.497	88.7989	51.1159		87.627	96.1459	87.6657	102.73		114.937	173.038	85.0569	113.296			115.077	85.8786	97.6166	102.588
115.077	85.8786	97.6166	102.588		130.349	97.8207	90.9867	105.831		71.6538	155.511	104.091	159.68			143.82	153.046	87.4532	52.0389
143.82	153.046	87.4532	52.0389		97.3494	155.697	99.5821	137.06		101.493	179.988	97.8917	167.973			110.642	136.155	70.7676	114.563
110.642	136.155	70.7676	114.563		77.0119	78.4639	117.308	115.928		125.625	163.403	83.4533	65.1478			155.705	185.716	69.6008	84.7652
155.705	185.716	69.6008	84.7652		148.902	142.824	55.6443	106.333		129.138	98.5535	197.243	99.2695			124.124	106.473	39.4798	83.2564
124.124	106.473	39.4798	83.2564		124.479	130.132	84.7105	101.644		87.5047	61.6035	81.565	123.767			79.4009	89.9218	104.722	1.29074
79.4009	89.9218	104.722	1.29074		124.209	143.381	119.311	91.6601		84.9405	189.897	87.6164	148.197			72.1997	132.077	250.06	114.258
																78.706	150.766	123.9	136.738
																119.206	111.694	90.2094	123.879
																63.853	160.438	89.5078	82.0006
																149.701	120.078	42.4699	104.351
																80.2939	86.1367	81.2522	63.7963
																91.502	116.591	49.1477	77.6163
																73.7283	183.151	180.426	49.9155
																46.3228	111.695	165.047	148.666
																116.247	79.3545	135.974	151.753
																113.273	96.0766	82.8814	78.8128
																82.7878	121.581	67.906	59.7396
																99.1126	157.114	44.4973	131.044
																116.146	93.835	112.002	110.359
																89.9183	126.25	99.421	104.883
																105.526	174.099	174.062	110.086
																74.6378	118.682	77.8887	50.1058
																83.0108	167.84	127.906	64.5318
																81.1145	135.292	127.011	99.3731
																151.367	117.979	119.196	70.9792
																58.7298	110.484	61.0361	67.0077
																115.182	128.391	138.849	84.7665
																105.025	124.446	76.8261	70.104
																91.0058	114.067	101.578	57.2758
																61.8182	81.3126	79.4269	78.0243
																113.826	132.663	59.5082	96.21
																103.55	92.3564	120.076	87.9245
																89.6788	156.154	150.21	98.6453
																105.503	107.527	109.043	67.6872
																68.4532	138.479	84.2911	55.0058
																84.8828	128.943	100.986	82.9972
																145.696	119.806	57.9963	76.9624
																80.0553	109.201	109.111	91.8878
																68.1056	160.51	69.6309	148.13
																48.5896	169.726	49.549	146.801
																103.072	166.638	90.4265	109.571
																118.649	151.492	91.2602	112.846
																87.3014	93.4042	104.688	145.519
																54.1319	111.856	80.8866	103.858
																120.436	123.787	65.7117	93.4341
																75.2091	112.066	90.7226	68.1469
																78.0322	92.2795	76.3833	121.49
																98.2454	107.089	76.5135	143.288
																101.835	157.403	77.7711	53.512
																126.007	92.5012	53.2898	84.9164
																67.1518	162.007	112.774	75.5052
																110.961	126.123	103.905	117.293
																101.221	127.374	46.8606	128.971
																107.378	106.008	111.161	115.858
																104.97	166.111	73.9674	107.49
																100.431	142.607	106.886	82.9775
																164.604	100.623	83.6816	109.088
																73.7495	155.786	95.9678	119.968
																165.689	120.52	119.424	78.8753
																95.789	176.642	115.797	106.021
																96.227	144.298	113.332	142.144
																153.14	133.533	85.926	69.0738
																94.8962	156.205	109.124	132.609
																92.8569	166.774	77.5184	108.287
																80.2523	143.287	91.7429	94.5334
																105.489	135.135	118.179	150.945
																140.316	124.002	121.389	84.648
																103.885	151.818	104.65	183.355
																100.999	172.608	127.561	76.7596
																97.5587	80.2795	157.044	89.998
																161.298	121.42	138.409	51.084
																120.615	174.795	83.9001	95.5839
																78.9203	124.157	129.056	105.878
																87.627	96.1459	87.6657	102.73
																130.349	97.8207	90.9867	105.831
																97.3494	155.697	99.5821	137.06
																77.0119	78.4639	117.308	115.928
																148.902	142.824	55.6443	106.333
																124.479	130.132	84.7105	101.644
																124.209	143.381	119.311	91.6601
																110.146	91.1107	133.935	124.014
																60.5873	114.916	104.231	94.6656
																59.4139	112.428	70.2472	88.0524
																81.6777	63.6922	86.9465	185.918
																109.258	80.0672	61.5769	55.601
																73.5241	94.7005	58.2991	63.9117
																99.5596	100.076	102.199	109.023
																75.3723	146.605	102.251	132.346
																46.8496	144.001	81.2899	122.423
																110.43	133.915	48.3819	76.7523
																90.4089	177.68	102.111	42.7258
																84.0034	87.2612	83.3902	185.852
																180.201	146.014	95.4767	79.4068
																74.7185	82.2011	101.759	130.08
																106.51	106.289	46.6553	200.636
																128.165	118.061	73.2149	164.437
																106.008	87.3543	80.2792	183.23
																72.3323	99.9074	92.8146	75.3154
																122.884	80.6078	60.0973	152.082
																84.2151	131.106	100.43	146.575
																76.2146	74.066	152.713	81.0872
																149.857	180.258	99.0424	29.5303
																75.4166	100.411	45.2025	82.4729
																58.9646	112.205	80.313	114.495
																80.0849	127.754	94.8316	89.5317
																152.197	113.065	48.3516	126.1
																133.915	170.378	105.809	94.7379
																128.002	105.934	112.6	102.056
																124.314	222.146	88.531	130.187
																118.657	103.08	61.106	97.275
																84.9005	128.985	83.3201	86.3033
																58.3145	134.131	83.6406	107.41
																208.432	102.314	153.225	122.889
																127.316	188.948	121.454	81.182
																103.094	134.161	103.098	64.1235
																60.47	90.9779	112.702	130.502
																83.4248	132.276	109.652	114.374
																102.859	207.972	136.292	97.9236
																99.8989	106.626	95.4727	79.8358
																103.033	131.745	56.4442	104.658
																67.3451	139.477	114.564	90.4604
																103.145	104.815	118.698	69.1725
																80.831	117.873	98.8032	104.452
																120.93	126.818	80.5974	99.2673
																120.26	115.165	125.675	88.8816
																110.875	171.931	99.8144	76.5651
																96.8735	128.022	89.6659	161.244
																78.7696	166.741	97.8256	94.6239
																109.574	141.919	78.2664	174.872
																64.6479	103.434	125.322	75.417
																99.4596	116.308	105.09	66.6375
																85.4357	197.442	93.4918	151.087
																154.577	99.2482	146.161	141.849
																127.049	154.911	126.016	197.342
																65.164	187.238	117.661	127.189
																134.4	120.699	106.003	160.66
																98.2991	89.0371	174.239	160.634
																166.073	113.176	167.311	119.25
																175.027	120.986	69.1943	86.0769
																63.9106	135.582	125.6	106.817
																52.9833	159.319	68.3983	86.1409
																94.6933	131.548	92.8221	97.4122
																87.3835	93.1323	132.52	143.031
																114.647	104.053	183.702	75.9118
																89.3198	116.118	60.3161	72.6707
																102.175	150.828	91.1279	119.18
																56.9727	116.231	78.2665	94.4881
																58.2551	185.72	166.544	119.209
																114.937	173.038	85.0569	113.296
																71.6538	155.511	104.091	159.68
																101.493	179.988	97.8917	167.973
																125.625	163.403	83.4533	65.1478
																129.138	98.5535	197.243	99.2695
																87.5047	61.6035	81.565	123.767
																84.9405	189.897	87.6164	148.197
																100	122.237	100	104.595

## Sheet: Figure 2G
		raw data axonal length (pixel)								normalized axonal length (%)
		KO EGFP	KO EGFP sema	KO_CRMP4EGFP	KO_CRMP4EGFP Sema					KO EGFP%	KO EGFP sema%	KO_CRMP4EGFP%	KO_CRMP4EGFP Sema%
		106.74	85.4264	35.6396	146.323					99.5361	79.6609	44.1488	181.259
		26.7279	49.9706	32.6274	200.934					24.924	46.5981	40.4174	248.909
		152.799	40.2843	76.2548	186.561					142.487	37.5655	94.4611	231.103
		209.238	50.8701	28.799	378.54					195.116	47.4368	35.675	468.919
		75.6985	80.9117	46.1127	108.773					70.5896	75.4509	57.1224	134.743
		46.799	190.622	50.4558	180.479					43.6405	177.757	62.5025	223.569
		29.7279	68.4264	90.6985	173.941					27.7215	63.8083	112.353	215.47
		46.9706	91.2254	116.912	43.346					43.8005	85.0685	144.825	53.6952
		60.2843	134.539	65.8406	72.4701					56.2157	125.459	81.5605	89.7728
		56.9706	77.8701	58.9706	141.247					53.1256	72.6146	73.0502	174.971
		146.238	30.7279	65.0122	117.199					136.368	28.6541	80.5343	145.181
		161.711	33.7279	44.5563	54.8136					150.797	31.4516	55.1944	67.9007
		38.0711	35.1421	68.2548	168.662					35.5017	32.7703	84.5511	208.931
		439.529	33.1421	57.4558	61.4636					409.865	30.9053	71.1738	76.1384
		448.718	203.208	35.4558	31.3221					418.434	189.494	43.9211	38.8004
		55.7696	63.2843	275.161	155.902					52.0057	59.0132	340.858	193.125
		58.6985	73.8406	30.8234	156.447					54.7369	68.8571	38.1827	193.8
		90.598	340.735	28.5563	80.694					84.4835	317.739	35.3743	99.9603
		413.191	79.0833	51.9706	76.5006					385.304	73.7459	64.3789	94.7656
		156.882	67.9706	15.0711	39.3156					146.294	63.3832	18.6694	48.7024
		354.806	34.3848	61.1838	135.969					330.86	32.0641	75.7918	168.432
		22.4853	60.8701	40.1421	99.9921					20.9678	56.7619	49.7263	123.866
		95.2548	31.5563	49.0416	137.38					88.826	29.4265	60.7506	170.18
		36.9706	59.4558	51.6985	70.244					34.4754	55.4431	64.0419	87.0153
		93.669	33.5563	30.0416	361.153					87.3472	31.2916	37.2142	447.381
		87.5269	84.4264	164.326	55.3701					81.6197	78.7284	203.56	68.5901
		47.6985	84.0122	73.2843	47.5232					44.4793	78.3422	90.7814	58.8697
		69.598	98.1838	107.225	39.3156					64.9008	91.5573	132.826	48.7024
		279.078	221.652	37.0416	170.073					260.243	206.692	45.8855	210.679
		57.6274	108.355	100.811	53.5656					53.7381	101.042	124.881	66.3547
		55.5563	149.397	117.77	48.7201					51.8068	139.314	145.888	60.3523
		65.7279	36.8995	254.823	112.477					61.2919	34.4091	315.664	139.332
		48.4853	72.6985	125.326	46.5895					45.213	67.792	155.248	57.7131
		66.4558	25.3137	163.539	22.609					61.9707	23.6053	202.585	28.0071
		193.196	25.5563	68.1127	105.394					180.157	23.8315	84.3751	130.558
		209.752	51.7279	157.711	209.226					195.596	48.2368	195.365	259.18
		58.1127	85.1543	47.3553	59.2375					54.1906	79.4072	58.6617	73.3809
		48.6274	58.2132	107.083	66.146					45.3455	54.2844	132.65	81.9388
		111.569	436.961	152.125	78.0746					104.039	407.47	188.446	96.7154
		154.468	40.1421	33.4853	220.323					144.043	37.4329	41.4801	272.926
		29.8995	132.225	129.74	24.2785					27.8816	123.301	160.716	30.0751
		97.0122	17.7279	38.3137	135.857					90.4648	16.5314	47.4614	168.293
		45.8995	30.3137	50.9533	227.939					42.8017	28.2678	63.1187	282.361
		53.5269	28.4853	40.2132	133.186					49.9143	26.5628	49.8144	164.985
		72.1838	122.983	44.799	28.5232					67.3121	114.683	55.4951	35.3333
		43.2132	55.0416	49.7696	43.7675					40.2967	51.3268	61.6524	54.2173
		49.1127	33.1421	232.865	29.1192					45.7981	30.9053	288.463	36.0716
		38.7279	90.1543	41.5269	49.209					36.1141	84.0697	51.4417	60.958
		174.74	104.498	190.995	90.1661					162.947	97.4449	236.596	111.694
		139.368	109.054	74.9949	187.01					129.962	101.694	92.9004	231.66
		29.3137	19.8995	33.5563	146.812					27.3353	18.5565	41.5681	181.865
		28.5563	69.6274	146.978	162.608					26.629	64.9282	182.07	201.432
		67.2548	33.3848	192.375	154.384					62.7157	31.1316	238.305	191.244
		52.7696	157.953	82.1838	38.5285					49.2081	147.293	101.806	47.7274
		96.1838	61.0416	112.669	72.9311					89.6923	56.9219	139.569	90.3439
		299.894	128.882	36.799	29.3545					279.654	120.184	45.585	36.3631
		122.669	160.924	97.4264	64.1506					114.39	150.063	120.688	79.4669
		79.598	140.669	33.9706	52.846					74.2259	131.175	42.0813	65.4634
		247.995	68.4264	48.799	54.6785					231.258	63.8083	60.4501	67.7333
		78.1127	178.539	76.7696	28.5675					72.8408	166.489	95.0989	35.3882
		78.2843	228.965	51.397	184.323					73.0008	213.512	63.6684	228.332
		436.534	47.6569	25.4853	69.6875					407.072	44.4405	31.5701	86.3259
		50.4558	55.5269	67.2132	81.1946					47.0505	51.7794	83.2608	100.58
		81.8701	64.2132	28.7279	159.23					76.3446	59.8794	35.5869	197.247
		38.2843	114.468	20.0416	153.53					35.7005	106.742	24.8267	190.186
		23.3848	486.701	35.4558	46.1006					21.8065	453.853	43.9211	57.1074
		188.338	76.4264	84.9533	52.194					175.627	71.2683	105.236	64.6557
		50.3553	103.527	44.6985	39.0571					46.9568	96.5398	55.3706	48.3822
		86.8823	64.2843	21.3848	86.5291					81.0186	59.9457	26.4906	107.189
		41.9706	50.6274	61.1838	47.635					39.138	47.2105	75.7918	59.0082
		34.5563	38.5563	139.054	203.093					32.2241	35.9541	172.254	251.582
		54.1838	14.3137	45.4558	39.6415					50.5269	13.3477	56.3087	49.1062
		35.2132	74.8406	34.9706	363.745					32.8366	69.7896	43.3201	450.591
		68.2132	196.309	25.0416	59.4006					63.6094	183.06	31.0204	73.5828
		62.0416	150.882	183.64	93.3421					57.8544	140.699	227.485	115.628
		23.8995	76.1543	36.8701	35.1895					22.2865	71.0146	45.6731	43.5913
		79.598	47.2132	23.8995	78.794					74.2259	44.0268	29.6057	97.6066
		116.326	33.6569	273.693	13.9241					108.475	31.3854	339.04	17.2485
		129.397	59.8701	98.8112	151.045					120.664	55.8294	122.403	187.108
		62.799	95.4264	141.154	217.247					58.5607	88.986	174.856	269.116
		117.64	113.941	62.799	24.9305					109.7	106.251	77.7927	30.8828
		34.799	52.598	269.291	22.8675					32.4504	49.0481	333.587	28.3273
		94.9117	110.569	52.9411	347.988					88.5061	103.106	65.5811	431.073
		300.421	117.498	46.3848	266.035					280.146	109.568	57.4595	329.552
		64.0416	82.1838	91.2843	49.9285					59.7194	76.6372	113.079	61.8492
		237.321	71.669	61.3553	96.5576					221.304	66.832	76.0043	119.611
		349.191	332.049	57.9706	174.565					325.624	309.639	71.8115	216.243
		140.711	130.426	68.8406	324.851					131.214	121.624	85.2768	402.411
		34.1421	33.0416	55.3553	186.358					31.8378	30.8116	68.5717	230.852
		17.1421	161.681	54.1838	28.4045					15.9852	150.769	67.1205	35.1863
		36.8701	32.1421	186.782	135.277					34.3817	29.9728	231.377	167.575
		161.054	99.0416	40.799	78.2375					150.184	92.3572	50.54	96.9173
		105.426	90.2254	170.865	184.852					98.3111	84.136	211.66	228.986
		30.5563	95.2548	44.6274	50.294					28.494	88.826	55.2825	62.3021
		32.9706	139.61	126.882	60.2551					30.7454	130.188	157.176	74.6414
		68.6985	52.3553	53.3848	360.31					64.062	48.8218	66.1308	446.337
		273.693	59.4558	34.799	42.6266					255.222	55.4431	43.1075	52.804
		109.054	227.995	50.4558	97.6031					101.694	212.607	62.5025	120.906
		47.1421	68.9411	29.5563	327.212					43.9605	64.2882	36.6131	405.336
		146.681	43.799	27.3137	136.458					136.782	40.843	33.835	169.038
		61.598	54.2132	98.2132	56.9045					57.4407	50.5543	121.662	70.4909
		149.397	49.1838	47.8701	74.8311					139.314	45.8644	59.2994	92.6975
		148.326	63.1127	67.2843	38.3656					138.315	58.8532	83.3489	47.5256
		190.368	40.6274	36.4558	311.09					177.519	37.8854	45.1599	385.365
		164.581	76.799	78.1838	229.8					153.473	71.6158	96.8507	284.666
		120.267	70.5563	80.6274	203.796					112.15	65.7944	99.8777	252.453
		84.2548	74.8406	30.9706	27.685					78.5684	69.7896	38.365	34.295
		178.309	34.3137	37.9706	108.093					166.275	31.9978	47.0363	133.9
		30.9706	85.6274	60.3553	32.8285					28.8804	79.8484	74.7655	40.6665
		135.225	58.9706	43.799	77.5855					126.099	54.9906	54.2563	96.1096
		50.8701	29.2426	46.4558	298.672					47.4368	27.269	57.5474	369.982
		251.522	91.0833	145.74	192.778					234.547	84.936	180.537	238.805
		46.4558	120.468	135.225	46.1285					43.3205	112.338	167.511	57.142
		107.64	202.581	161.054	119.819					100.375	188.908	199.506	148.426
		98.8112	53.7279	34.1421	157.195					92.1424	50.1018	42.2938	194.726
		141.154	52.6569	105.569	69.5921					131.628	49.1031	130.774	86.2076
		97.7696	63.9411	237.321	65.0051					91.1711	59.6257	293.983	80.5255
		80.6274	29.5563	45.1127	33.1266					75.1858	27.5615	55.8837	41.0358
		44.6274	37.8995	71.2843	42.9525					41.6155	35.3416	88.3039	53.2077
		68.8406	49.6985	66.6274	48.5571					64.1945	46.3443	82.5351	60.1504
		49.1421	118.711	37.7279	128.695					45.8255	110.699	46.7357	159.421
		156.024	26.1421	170.196	50.946					145.494	24.3778	210.831	63.1097
		50.8701	120.941	140.711	54.583					47.4368	112.779	174.306	67.6151
		130.255	26.8995	51.2132	195.667					121.464	25.084	63.4407	242.384
		349.534	33.3848	114.74	183.997					325.944	31.1316	142.135	227.928
		46.3848	25.5563	193.51	128.071					43.2543	23.8315	239.711	158.648
		290.463	58.9411	32.9706	49.698					270.859	54.9631	40.8426	61.5637
		91.2843	288.279	300.421	30.861					85.1235	268.823	372.149	38.2293
		269.291	112.74	48.7279	66.7421					251.117	105.131	60.362	82.6772
		114.74	40.9706	81.4264	31.6201					106.996	38.2055	100.867	39.1696
		82.3259	163.711	40.2132	190.743					76.7697	152.662	49.8144	236.284
		36.4558	78.6274	30.5563	51.109					33.9954	73.3208	37.8518	63.3117
		93.1838	67.2132	21.8995	174.919					86.8948	62.6769	27.1282	216.682
		68.4558	132.64	115.498	42.6545					63.8357	123.688	143.073	52.8386
		136.811	84.5269	50.8701	28.0785					127.578	78.8221	63.0157	34.7824
		65.1127	50.2132	44.6985	122.764					60.7182	46.8243	55.3706	152.075
		53.0416	41.5563	166.095	65.5616					49.4618	38.7516	205.752	81.2149
		270.522	53.6274	50.8701	205.195					252.264	50.0081	63.0157	254.187
		166.095	40.3848	156.024	56.8766					154.886	37.6592	193.276	70.4563
		67.2843	64.0122	309.25	50.0636					62.7432	59.692	383.085	62.0166
		220.853	84.6985	61.598	54.1616					205.947	78.9821	76.3049	67.093
		186.782	79.1543	171.439	49.1415					174.176	73.8121	212.371	60.8744
		50.4558	133.255	28.2426	61.9525					47.0505	124.261	34.9857	76.7441
		45.1127	69.6985	116.326	138.751					42.068	64.9945	144.099	171.879
		60.0416	47.2843	72.6985	46.983					55.9894	44.0931	90.0558	58.2005
		27.3137	121.024	107.64	158.538					25.4703	112.856	133.339	196.39
		105.569	30.1421	40.3848	62.3181					98.4436	28.1078	50.0269	77.197
		47.5563	23.2426	230.137	29.6525					44.3467	21.6739	285.084	36.7323
		77.1127	63.0122	64.9411	289.105					71.9083	58.7595	80.4462	358.131
		66.6274	51.0416	94.9117	214.476					62.1307	47.5968	117.573	265.684
		40.799	354.678	226.489	118.936					38.0455	330.741	280.564	147.333
		44.6985	56.4496	74.5368	120.308					41.6818	52.6398	92.3329	149.032
		78.5269	107.638	60.3785	47.635					73.2271	100.374	74.7943	59.0082
		33.0416	67.6096	27.5221	207.556					30.8116	63.0466	34.0931	257.112
		251.522	205.459	284.732	181.799					234.547	191.593	352.714	225.205
		120.267	220.989	53.0766	175.054					112.15	206.074	65.749	216.849
		62.799	111.903	83.0551	54.583					58.5607	104.351	102.885	67.6151
		270.522	62.8661	42.559	60.5136					252.264	58.6233	52.7203	74.9616
		57.9706	192.918	49.209	127.947					54.0581	179.898	60.958	158.495
		68.6985	62.1892	301.685	111.46					64.062	57.992	373.715	138.071
		53.0416	109.883	21.985	205.128					49.4618	102.467	27.2341	254.103
		29.7279	73.4813	61.9921	222.048					27.7215	68.522	76.7931	275.064
		60.3553	327.351	28.2415	40.496					56.2819	305.258	34.9844	50.1647
		79.3848	158.948	35.1221	76.3375					74.0271	148.22	43.5077	94.5636
		116.326	129.067	41.3785	171.254					108.475	120.356	51.2579	212.142
		104.426	143.215	24.5656	38.7591					97.3786	133.55	30.4308	48.013
		72.9411	274.279	41.446	60.6766					68.0183	255.768	51.3415	75.1635
		36.8701	163.769	43.183	76.6636					34.3817	152.716	53.4932	94.9675
		47.1421	202.669	137.801	202.115					43.9605	188.991	170.702	250.371
		94.9117	61.1657	91.3071	244.809					88.5061	57.0376	113.107	303.258
		74.7696	29.1879	49.833	107.727					69.7234	27.218	61.731	133.448
		54.1127	528.93	40.5311	197.174					50.4606	493.232	50.2082	244.25
		161.054	61.2318	46.1285	47.6071					150.184	57.0992	57.142	58.9736
		34.1421	125.507	42.0701	89.3791					31.8378	117.036	52.1146	110.719
		19.6569	171.687	34.959	36.0721					18.3302	160.1	43.3058	44.6845
		73.1127	384.703	20.411	188.123					68.1783	358.739	25.2843	233.039
		47.5563	66.8392	120.634	46.7525					44.3467	62.3282	149.436	57.915
		61.598	383.112	24.998	60.4855					57.4407	357.255	30.9665	74.9269
		97.7696	48.3987	28.8656	96.6811					91.1711	45.1322	35.7574	119.764
		64.0416	131.884	27.2915	42.5311					59.7194	122.983	33.8075	52.6857
		61.3553	72.3257	122.343	124.855					57.2144	67.4444	151.553	154.665
		220.853	117.004	36.235	210.271					205.947	109.108	44.8863	260.475
		65.1127	104.21	54.9486	166.273					60.7182	97.1768	68.0679	205.972
		112.598	149.329	97.2375	47.4045					104.999	139.25	120.454	58.7227
		53.3848	19.4365	81.4531	102.286					49.7818	18.1248	100.901	126.707
		28.0711	303.809	29.6525	100.875					26.1766	283.305	36.7323	124.959
		127.054	86.1822	58.9395	72.6051					118.479	80.3657	73.0117	89.94
		242.652	31.4331	31.8785	61.7616					226.275	29.3116	39.4897	76.5076
		52.9411	115.304	55.3701	38.894					49.3681	107.522	68.5901	48.1803
		149.397	46.2469	47.8656	128.11					139.314	43.1257	59.2938	158.697
		171.439	56.8348	58.8966	51.6656					159.868	52.999	72.9585	64.0011
		230.137	52.3717	45.8266	150.708					214.605	48.8371	56.768	186.69
		34.6274	43.3635	79.6766	86.3266					32.2904	40.4369	98.6999	106.938
		40.3848	114.148	42.7221	79.8791					37.6592	106.444	52.9222	98.9508
		81.5563	74.3452	206.797	90.8855					76.052	69.3276	256.171	112.585
		51.2132	31.3009	193.469	226.489					47.7568	29.1884	239.661	280.564
		50.8701	66.1348	85.9726	239.8					47.4368	61.6713	106.499	297.054
		105.426	55.0022	104.321	188.747					98.3111	51.29	129.228	233.812
		46.3848	60.2357	36.7915	201.232					43.2543	56.1704	45.5757	249.278
		68.8406	44.7722	39.3156	269.548					64.1945	41.7505	48.7024	333.905
		26.1421	51.3209	49.7656	70.244					24.3778	47.8573	61.6474	87.0153
		394.22	133.266	70.9636	274.338					367.614	124.272	87.9066	339.838
		54.1838	49.5544	86.0681	161.917					50.5269	46.2099	106.617	200.575
		22.0711	94.4861	34.796	30.7656					20.5815	88.1092	43.1038	38.111
		99.2548	31.3669	130.038	224.493					92.556	29.25	161.086	278.093
		49.5563	29.0944	61.7895	51.733					46.2117	27.1308	76.5422	64.0846
		22.3137	61.0335	22.311	61.6266					20.8077	56.9143	27.6379	76.3404
		37.7279	65.9479	49.7536	40.4285					35.1816	61.497	61.6326	50.0811
		23.0711	60.3952	28.8721	149.269					21.514	56.3191	35.7655	184.908
		46.4558	70.3335	18.837	45.8025					43.3205	65.5866	23.3344	56.7382
		269.291	73.1622	20.6415	26.735					251.117	68.2244	25.5698	33.1182
		156.024	58.6287	34.1721	90.1661					145.494	54.6718	42.3309	111.694
		154.782	93.6222	292.146	333.21					144.335	87.3036	361.898	412.766
		35.5563	56.8348	148.386	110.414					33.1566	52.999	183.814	136.776
		427.073	70.1466	16.448	114.214					398.25	65.4123	20.3751	141.484
		215.238	49.3287	63.7571	95.2421					200.711	45.9995	78.9795	117.982
		80.6274	152.438	154.114	160.545					75.1858	142.15	190.91	198.876
		28.2426	59.6248	61.233	35.2175					26.3365	55.6007	75.8528	43.626
		170.196	65.6561	63.2681	47.444					158.709	61.225	78.3738	58.7716
		145.368	92.5987	36.0045	168.702					135.557	86.3492	44.6008	208.98
		45.2843	28.5769	44.2285	190.158					42.228	26.6483	54.7883	235.56
		120.598	46.4727	31.485	331.27					112.459	43.3362	39.0022	410.363
		39.9706	134.367	74.8311	57.3375					37.273	125.298	92.6975	71.0273
		126.882	79.4466	57.7311	39.1525					118.319	74.0847	71.5148	48.5005
		236.806	61.1653	58.383	130.134					220.824	57.0372	72.3223	161.204
		107.238	96.3022	80.7261	115.659					100	89.8027	100	143.273
