# Supplementary material for: CRMP4-mediated fornix development involves Semaphorin-3E signaling pathway
Source: eLife journal article supplement (doi:10.7554/elife.70361), 2021-12-03
Supplement: fig7-data1 [file Figure 7 uncroppped blot with relevant bands .pdf › Figure 7-Source Data 1/Figure 7 uncroppped blot with relevant bands .pdf]

Figure 7

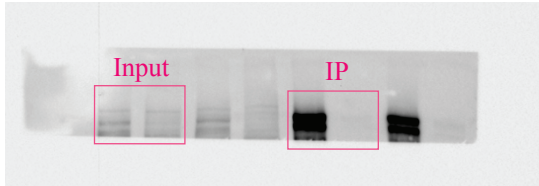

VEGFR2 (Fig 7A)

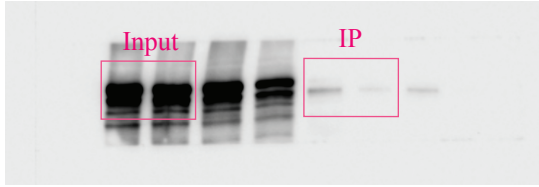

PlxD1 (Fig 7A)

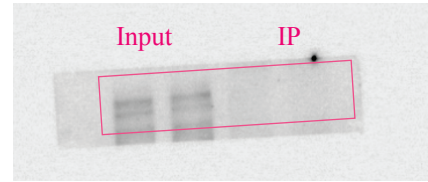

VEGFR2 (Fig 7B)

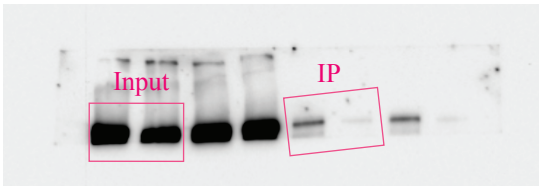

Nrp1 (Fig 7A)

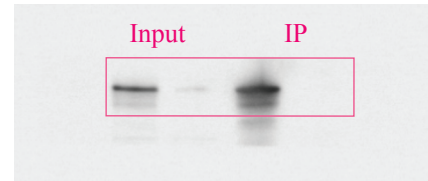

CRMP4 (Fig 7B)

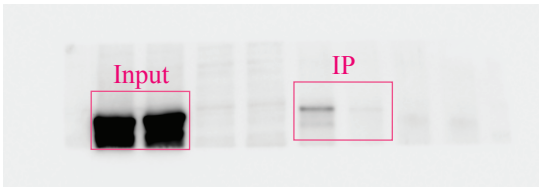

CRMP4 (Fig 7A)

Note that for PlxD1, the WB was revealed upside down

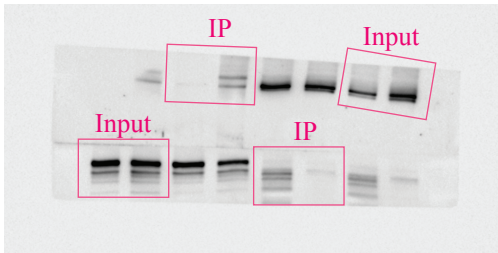

PlxD1 (Fig 7C)

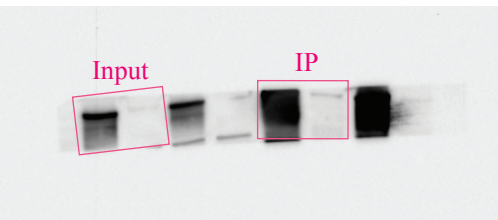

Nrp1 (Fig 7D)

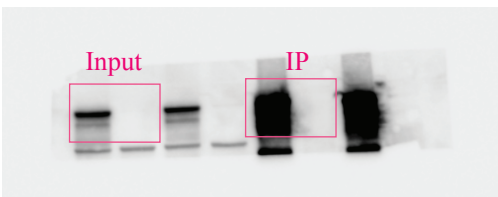

CRMP4  
IP PlxD1 (Fig 7C)



CRMP4  
IP Nrp1 (Fig 7D)
