# Supplementary material for: CRMP4-mediated fornix development involves Semaphorin-3E signaling pathway
Source: eLife journal article supplement (doi:10.7554/elife.70361), 2021-12-03
Supplement: fig8-data1 [file elife-70361-fig8-data1-v5.zip]

Figure 8

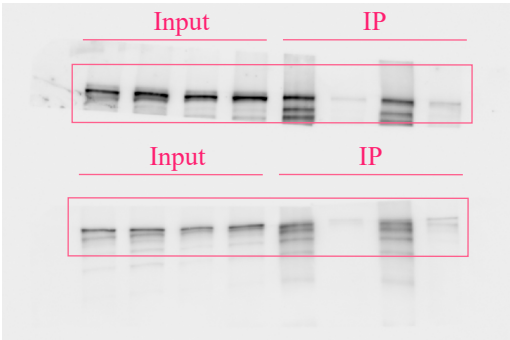

Plx/D1 (Fig 8A)

Nrp1 (Fig 8A)

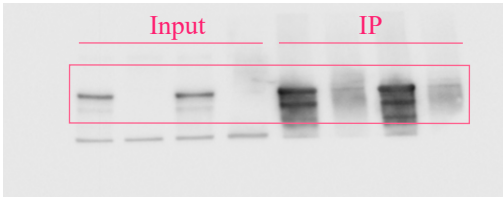

CRMP4 (Fig 8A)

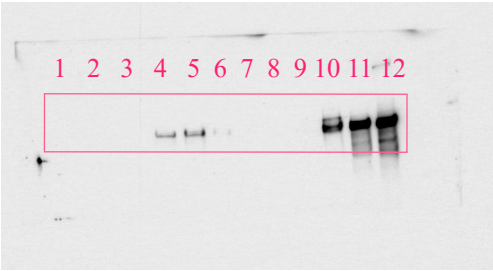

Plx/D1 (Fig 8B)

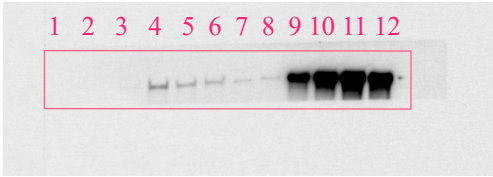

CRMP4 (Fig 8B)

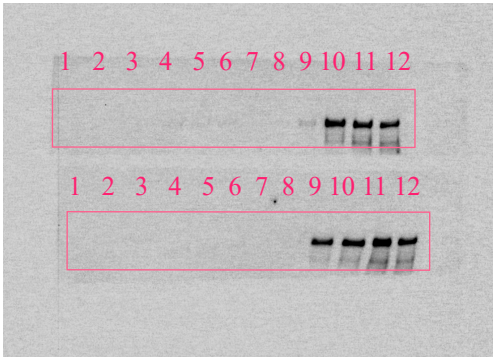

Plx/D1(Fig 8C)

CRMP4 (Fig 8C)

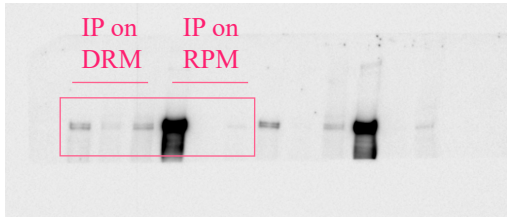

Plx/D1 (Fig 8D)

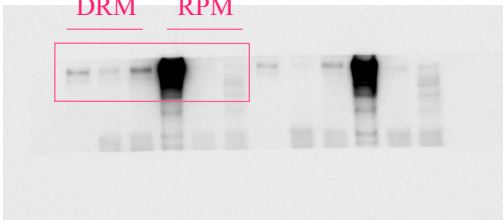

Nrp1 (Fig 8D)

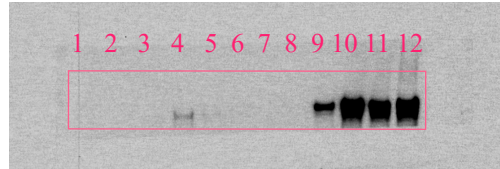

Nrp1 (Fig 8B)

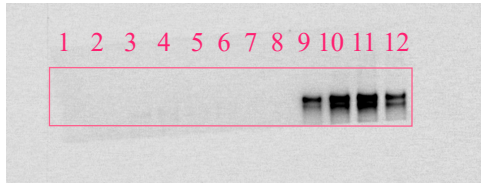

Nrp1 (Fig 8C)

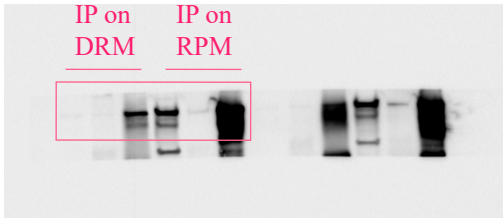

CRMP4 (Fig 8D)

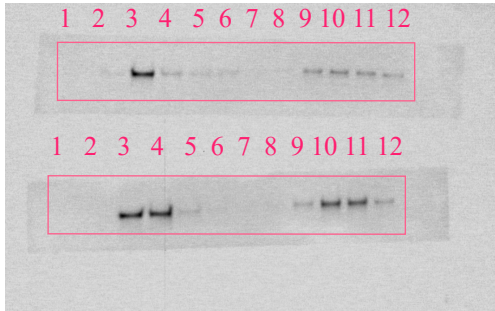

Flotilin (Fig 8C)

Flotilin (Fig 8B)
