# Supplementary material for: CRMP4-mediated fornix development involves Semaphorin-3E signaling pathway
Source: eLife journal article supplement (doi:10.7554/elife.70361), 2021-12-03
Supplement: fig9-data1 [file Figure 9B.xlsx]

## Sheet:  Figure 9B 
	randomly selected data values
	0mM MCD ctrl	0mM MCD sema3E		0,5mM MCD ctrl	0,5mM MCD sema3E		1mM MCD ctrl	1mM MCD sema3E		1,5mM MCD ctrl	1,5mM MCD sema3E				0mM MCD ctrl	%	0mM MCD sema3E	%		Culture 1		0,5mM MCD ctrl	%	0,5mM MCD sema3E	%		Culture 1		1mM MCD ctrl	%	1mM MCD sema3E	%		Culture 1		1,5mM MCD ctrl	%	1,5mM MCD sema3E	%
culture 1	73.3553	210.338	culture 1	224.681	68.2132	culture 1	122.083	125.912	culture 1	241.965	306.924		mean 0mM MCD ctrl	120.227	73.3553	61.0138	210.338	174.95		mean 0,5mM MCD ctrl	125.531	224.681	178.984	68.2132	54.3396		mean 1mM MCD ctrl	138.18	122.083	88.3509	125.912	91.1215		mean 1,5mM MCD ctrl	143.737	241.965	168.339	306.924	213.531
	318.889	189.338		216.451	103.113		22.8995	130.213		94.1127	77.8701		mean normalized 0mM MCD ctrl	100	318.889	265.238	189.338	157.483		mean normalized 0,5mM MCD ctrl	100	216.451	172.428	103.113	82.141		mean normalized 1mM MCD ctrl	100	22.8995	16.5722	130.213	94.2345		mean normalized 1,5mM MCD ctrl	100	94.1127	65.4754	77.8701	54.1753
	34.3848	293.693		417.245	91.7817		152.154	129.711		72.7696	111.841		mean normalized 0mM MCD sema3E	141.911	34.3848	28.5998	293.693	244.281		mean normalized 0,5mM MCD sema3E	136.408	417.245	332.383	91.7817	73.1146		mean normalized 1mM MCD sema3E	106.159	152.154	110.113	129.711	93.8708		mean normalized 1,5mM MCD sema3E	99.051	72.7696	50.6268	111.841	77.809
	719.749	81.598		59.7696	129.297		38.8701	153.752		239.764	134.74				719.749	598.656	81.598	67.8697				59.7696	47.6133	129.297	102.999				38.8701	28.1301	153.752	111.27				239.764	166.807	134.74	93.7405
	68.0122	504.031		27.3137	110.154		47.3848	124.711		76.6985	29.9706				68.0122	56.5696	504.031	419.232				27.3137	21.7585	110.154	87.7504				47.3848	34.2921	124.711	90.2524				76.6985	53.3602	29.9706	20.8509
	194.853	160.539		212.309	82.1543		373.421	126.811		140.841	150.368				194.853	162.07	160.539	133.529				212.309	169.128	82.1543	65.4453				373.421	270.243	126.811	91.7725				140.841	97.9847	150.368	104.613
	29.9706	263.551		58.799	242.066		184.551	186.669		549.345	36.3848				29.9706	24.9282	263.551	219.211				58.799	46.8401	242.066	192.833				184.551	133.559	186.669	135.091				549.345	382.187	36.3848	25.3134
	40.4558	168.652		167.024	112.284		136.154	158.61		88.3553	120.184				40.4558	33.6494	168.652	140.277				167.024	133.054	112.284	89.4472				136.154	98.534	158.61	114.785				88.3553	61.4699	120.184	83.6135
	114.054	41.8701		83.3553	112.397		208.853	364.019		377.877	193.735				114.054	94.865	41.8701	34.8257				83.3553	66.402	112.397	89.537				208.853	151.145	364.019	263.439				377.877	262.894	193.735	134.784
	100.498	231.024		88.7696	158.539		53.9411	220.894		153.64	155.841				100.498	83.5895	231.024	192.156				88.7696	70.7151	158.539	126.294				53.9411	39.0368	220.894	159.86				153.64	106.889	155.841	108.42
	166.024	132.569		154.125	72.4558		100.912	223.723		39.0416	99.7696				166.024	138.092	132.569	110.265				154.125	122.778	72.4558	57.7193				100.912	73.0292	223.723	161.907				39.0416	27.1618	99.7696	69.411
	234.007	547.914		45.799	145.912		216.681	142.74		78.1543	348.392				234.007	194.637	547.914	455.731				45.799	36.4841	145.912	116.235				216.681	156.811	142.74	103.3				78.1543	54.373	348.392	242.381
	60.669	365.433		55.799	101.74		76.1543	44.5563		122.184	140.64				60.669	50.4618	365.433	303.952				55.799	44.4503	101.74	81.0476				76.1543	55.1124	44.5563	32.2451				122.184	85.0049	140.64	97.8448
	66.4264	179.38		35.2132	89.7401		78.2548	111.811		119.456	34.5563				66.4264	55.2506	179.38	149.2				35.2132	28.0513	89.7401	71.4882				78.2548	56.6325	111.811	80.9171				119.456	83.107	34.5563	24.0413
	71.669	110.255		60.3553	138.225		193.61	487.375		78.4264	136.61				71.669	59.6112	110.255	91.7052				60.3553	48.0799	138.225	110.112				193.61	140.115	487.375	352.71				78.4264	54.5623	136.61	95.0415
	57.6985	347.108		61.7696	186.794		81.3259	202.439		174.326	107.74				57.6985	47.9911	347.108	288.709				61.7696	49.2065	186.794	148.803				81.3259	58.8551	202.439	146.504				174.326	121.281	107.74	74.9562
	135.054	148.368		110.154	234.681		93.9828	173.397		126.782	169.095				135.054	112.332	148.368	123.406				110.154	87.7504	234.681	186.95				93.9828	68.0148	173.397	125.486				126.782	88.2037	169.095	117.642
	153.995	89.6396		55.9411	152.983		249.823	95.598		67.5563	193.368				153.995	128.086	89.6396	74.5583				55.9411	44.5635	152.983	121.868				249.823	180.796	95.598	69.1837				67.5563	46.9998	193.368	134.528
	194.095	62.4558		35.7279	273.451		215.912	136.397		78.7696	133.225				194.095	161.44	62.4558	51.948				35.7279	28.4613	273.451	217.835				215.912	156.254	136.397	98.7097				78.7696	54.801	133.225	92.6867
	36.6274	169.539		113.426	90.8406		93.9117	109.125		355.208	17.0711				36.6274	30.4651	169.539	141.015				113.426	90.357	90.8406	72.3649				93.9117	67.9633	109.125	78.973				355.208	247.123	17.0711	11.8766
	133.841	137.539		124.196	150.012		60.1127	15.4853		55.799	97.397				133.841	111.323	137.539	114.399				124.196	98.9362	150.012	119.502				60.1127	43.5032	15.4853	11.2066				55.799	38.8201	97.397	67.7604
	26.3137	208.024		48.0416	180.811		53.7279	152.125		71.8406	118.569				26.3137	21.8866	208.024	173.026				48.0416	38.2706	180.811	144.037				53.7279	38.8826	152.125	110.092				71.8406	49.9805	118.569	82.4897
	240.409	219.51		72.4264	124.426		34.8284	203.723		181.338	551.801				240.409	199.962	219.51	182.579				72.4264	57.6959	124.426	99.1198				34.8284	25.2051	203.723	147.433				181.338	126.159	551.801	383.895
	123.539	41.0416		76.1127	57.4264		132.255	136.882		86.1838	153.024				123.539	102.754	41.0416	34.1366				76.1127	60.6324	57.4264	45.7467				132.255	95.712	136.882	99.0609				86.1838	59.9592	153.024	106.461
	14.7279	145.953		39.3137	226.208		102.811	139.711		74.4975	178.581				14.7279	12.25	145.953	121.398				39.3137	31.3178	226.208	180.201				102.811	74.4038	139.711	101.108				74.4975	51.8289	178.581	124.241
	121.125	454.693		769.896	240.492		71.4264	103.87		82.1543	123.456				121.125	100.746	454.693	378.194				769.896	613.31	240.492	191.58				71.4264	51.6908	103.87	75.1702				82.1543	57.1558	123.456	85.8898
	104.941	164.439		73.3848	87.4975		183.48	84.7401		75.0122	39.7279				104.941	87.2855	164.439	136.773				73.3848	58.4593	87.4975	69.7017				183.48	132.783	84.7401	61.3259				75.0122	52.187	39.7279	27.6392
	42.3137	21.8995		109.113	141.225		288.551	208.894		200.368	112.326				42.3137	35.1947	21.8995	18.2151				109.113	86.9207	141.225	112.502				288.551	208.823	208.894	151.176				200.368	139.398	112.326	78.1466
	62.0122	122.468		164.569	275.238		43.1421	175.439		201.894	137.882				62.0122	51.5791	122.468	101.864				164.569	131.098	275.238	219.258				43.1421	31.2217	175.439	126.964				201.894	140.461	137.882	95.9265
	108.154	526.902		94.8701	180.309		245.054	151.397		103.125	52.9411				108.154	89.9581	526.902	438.254				94.8701	75.5748	180.309	143.636				245.054	177.344	151.397	109.565				103.125	71.7454	52.9411	36.8318
	46.6985	256.421		308.823	155.267		126.74	138.397		116.296	67.0416				46.6985	38.8418	256.421	213.28				308.823	246.013	155.267	123.688				126.74	91.721	138.397	100.157				116.296	80.909	67.0416	46.6417
	129.095	154.297		113.811	184.326		105.225	189.853		252.125	121.598				129.095	107.376	154.297	128.337				113.811	90.6636	184.326	146.837				105.225	76.151	189.853	137.395				252.125	175.407	121.598	84.5973
	342.706	56.6274		78.7696	99.6396		228.409	150.326		60.7696	1504.43				342.706	285.048	56.6274	47.1002				78.7696	62.749	99.6396	79.3743				228.409	165.298	150.326	108.79				60.7696	42.2782	1504.43	1046.65
	53.1127	135.539		152.297	272.25		144.882	88.2548		76.0122	226.108				53.1127	44.1768	135.539	112.736				152.297	121.321	272.25	216.878				144.882	104.85	88.2548	63.8695				76.0122	52.8827	226.108	157.306
	58.0416	55.6274		64.2132	446.505		69.1127	243.066		137.397	176.225				58.0416	48.2765	55.6274	46.2685				64.2132	51.1531	446.505	355.692				69.1127	50.0164	243.066	175.905				137.397	95.5889	176.225	122.602
	99.1838	223.238		20.3137	97.1838		95.799	91.1249		164.581	120.355				99.1838	82.4968	223.238	185.679				20.3137	16.1822	97.1838	77.418				95.799	69.3291	91.1249	65.9465				164.581	114.501	120.355	83.7328
	312.166	420.333		126.74	187.539		156.024	179.024		184.125	167.338				312.166	259.647	420.333	349.615				126.74	100.963	187.539	149.396				156.024	112.914	179.024	129.559				184.125	128.098	167.338	116.419
	58.1127	193.924		190.154	180.581		95.669	45.2132		258.581	72.6985				58.1127	48.3356	193.924	161.297				190.154	151.48	180.581	143.853				95.669	69.2351	45.2132	32.7205				258.581	179.898	72.6985	50.5773
	173.48	45.4558		202.853	89.4975		93.5685	163.167		88.1543	128.74				173.48	144.293	45.4558	37.8082				202.853	161.595	89.4975	71.2949				93.5685	67.7149	163.167	118.083				88.1543	61.3301	128.74	89.5662
	146.095	85.6274		46.5269	337.948		128.083	117.983		33.4853	269.037				146.095	121.516	85.6274	71.2212				46.5269	37.064	337.948	269.214				128.083	92.6931	117.983	85.3834				33.4853	23.2962	269.037	187.172
	105.426	128.042		374.321	156.811		86.4975	138.498		91.8701	134.569				105.426	87.6891	128.042	106.499				374.321	298.189	156.811	124.918				86.4975	62.5977	138.498	100.23				91.8701	63.9152	134.569	93.6211
	103.154	172.024		91.9828	68.0416		71.2843	156.267		77.3848	117.711				103.154	85.7993	172.024	143.082				91.9828	73.2748	68.0416	54.2029				71.2843	51.588	156.267	113.089				77.3848	53.8376	117.711	81.8929
	346.078	229.995		62.5563	144.012		121.941	108.64		145.983	45.3137				346.078	287.853	229.995	191.3				62.5563	49.8332	144.012	114.722				121.941	88.248	108.64	78.6218				145.983	101.562	45.3137	31.5253
	108.255	126.953		448.889	207.439		111.012	145.782		90.669	185.297				108.255	90.0416	126.953	105.594				448.889	357.591	207.439	165.248				111.012	80.3388	145.782	105.501				90.669	63.0796	185.297	128.913
	71.598	169.196		89.2548	192.61		385.375	87.9411		66.1127	182.238				71.598	59.5521	169.196	140.73				89.2548	71.1016	192.61	153.436				385.375	278.893	87.9411	63.6424				66.1127	45.9955	182.238	126.785
	54.6985	156.196		62.0416	42.6274		124.841	91.4558		227.723	180.853				54.6985	45.4958	156.196	129.917				62.0416	49.4232	42.6274	33.9576				124.841	90.3464	91.4558	66.186				227.723	158.43	180.853	125.822
	96.669	230.782		39.1421	41.5563		248.179	186.581		119.113	90.8701				96.669	80.4051	230.782	191.954				39.1421	31.1811	41.5563	33.1043				248.179	179.605	186.581	135.027				119.113	82.8683	90.8701	63.2195
	74.2548	260.166		58.1127	46.799		263.12	133.255		112.941	151.326				74.2548	61.7619	260.166	216.395				58.1127	46.2934	46.799	37.2807				263.12	190.418	133.255	96.4357				112.941	78.5746	151.326	105.279
	127.61	154.912		52.3553	66.1127		73.0416	46.799		141.882	114.882				127.61	106.141	154.912	128.849				52.3553	41.707	66.1127	52.6663				73.0416	52.8598	46.799	33.8681				141.882	98.7094	114.882	79.9251
	77.598	221.752		96.1543	189.225		105.87	28.4853		76.2548	269.48				77.598	64.5427	221.752	184.444				96.1543	76.5978	189.225	150.74				105.87	76.6175	28.4853	20.6146				76.2548	53.0515	269.48	187.481
	62.7279	133.297		201.539	171.681		56.8995	160.569		140.426	78.6396				62.7279	52.1743	133.297	110.87				201.539	160.549	171.681	136.764				56.8995	41.1778	160.569	116.202				140.426	97.6965	78.6396	54.7106
	294.137	253.179		61.1421	99.669		25.8995	117.326		119.841	68.1421				294.137	244.65	253.179	210.583				61.1421	48.7066	99.669	79.3977				25.8995	18.7433	117.326	84.908				119.841	83.3747	68.1421	47.4074
	197.681	149.196		69.1838	263.179		110.77	162.368		24.8995	132.64				197.681	164.423	149.196	124.095				69.1838	55.1128	263.179	209.652				110.77	80.1633	162.368	117.504				24.8995	17.3229	132.64	92.2791
	31.799	319.505		48.8701	194.309		77.5685	174.024		411.505	83.669				31.799	26.449	319.505	265.75				48.8701	38.9306	194.309	154.789				77.5685	56.1358	174.024	125.94				411.505	286.289	83.669	58.2096
	59.1421	304.291		247.48	162.752		110.498	750.838		51.0416	154.711				59.1421	49.1918	304.291	253.096				247.48	197.146	162.752	129.651				110.498	79.9664	750.838	543.377				51.0416	35.5103	154.711	107.634
	388.534	45.6985		183.409	145.297		69.0122	426.777		61.2132	75.598				388.534	323.166	45.6985	38.01				183.409	146.106	145.297	115.745				69.0122	49.9437	426.777	308.856				61.2132	42.5868	75.598	52.5945
	57.2132	64.5563		94.1838	137.498		60.6985	101.498		441.463	84.7401				57.2132	47.5875	64.5563	53.6951				94.1838	75.0281	137.498	109.532				60.6985	43.9271	101.498	73.4531				441.463	307.132	84.7401	58.9548
	100.113	317.563		134.397	213.451		243.137	87.5269		102.083	136.711				100.113	83.2694	317.563	264.136				134.397	107.063	213.451	170.038				243.137	175.957	87.5269	63.3427				102.083	71.0207	136.711	95.1114
	141.64	41.4853		161.338	69.1838		132.698	103.355		65.9411	59.6274				141.64	117.81	41.4853	34.5057				161.338	128.524	69.1838	55.1128				132.698	96.0331	103.355	74.7976				65.9411	45.8761	59.6274	41.4836
	125.113	203.338		59.799	152.681		35.8995	168.297		42.7279	230.35				125.113	104.063	203.338	169.128				59.799	47.6367	152.681	121.628				35.8995	25.9802	168.297	121.795				42.7279	29.7264	230.35	160.258
	46.6274	36.6274		234.279	307.894		110.468	333.865		88.4264	166.368				46.6274	38.7826	36.6274	30.4651				234.279	186.63	307.894	245.273				110.468	79.945	333.865	241.616				88.4264	61.5194	166.368	115.744
	41.3137	685.144		146.083	280.622		100.326	200.752		76.2132	418.664				41.3137	34.3629	685.144	569.873				146.083	116.372	280.622	223.548				100.326	72.6052	200.752	145.283				76.2132	53.0225	418.664	291.27
	97.6274	229.794		138.598	124.397		150.953	422.676		261.267	148.711				97.6274	81.2022	229.794	191.133				138.598	110.409	124.397	99.0964				150.953	109.244	422.676	305.888				261.267	181.767	148.711	103.46
	408.978	405.747		69.1838	189.309		191.882	87.2548		352.747	131.698				408.978	340.17	405.747	337.483				69.1838	55.1128	189.309	150.806				191.882	138.864	87.2548	63.1458				352.747	245.411	131.698	91.6244
	268.208	197.853		1222.69	125.096		132.912	66.2843		77.669	177.297				268.208	223.084	197.853	164.565				1222.69	974.008	125.096	99.6528				132.912	96.1874	66.2843	47.9695				77.669	54.0353	177.297	123.348
	163.368	44.5563		72.0122	49.2132		297.149	126.012		34.799	94.9411				163.368	135.882	44.5563	37.06				72.0122	57.3659	49.2132	39.2039				297.149	215.045	126.012	91.1943				34.799	24.2101	94.9411	66.0518
	77.8701	260.279		207.439	113.426		361.551	103.426		44.799	19.4853				77.8701	64.769	260.279	216.489				207.439	165.248	113.426	90.357				361.551	261.652	103.426	74.8491				44.799	31.1673	19.4853	13.5562
	104.669	289.563		37.799	96.8406		49.799	125.669		196.681	115.355				104.669	87.0591	289.563	240.846				37.799	30.1112	96.8406	77.1446				49.799	36.0392	125.669	90.9459				196.681	136.834	115.355	80.2542
	42.0416	44.4558		109.882	95.9706		225.995	43.3848		79.6985	162.924				42.0416	34.9684	44.4558	36.9764				109.882	87.5338	95.9706	76.4515				225.995	163.551	43.3848	31.3973				79.6985	55.4473	162.924	113.348
	98.2254	188.054		231.137	184.267		123.225	98.3259		63.1838	99.4975				98.2254	81.6996	188.054	156.415				231.137	184.127	184.267	146.79				123.225	89.1775	98.3259	71.1579				63.1838	43.9578	99.4975	69.2217
	64.9411	164.924		24.3137	283.492		107.841	135.397		33.799	101.113				64.9411	54.0152	164.924	137.177				24.3137	19.3686	283.492	225.834				107.841	78.0436	135.397	97.986				33.799	23.5144	101.113	70.3454
	88.468	189.196		79.8112	325.078		119.012	159.297		37.2426	196.853				88.468	73.5838	189.196	157.365				79.8112	63.5787	325.078	258.962				119.012	86.1284	159.297	115.282				37.2426	25.9102	196.853	136.953
	216.309	109.012		92.5269	107.284		177.338	101.983		63.1127	136.882				216.309	179.916	109.012	90.6716				92.5269	73.7082	107.284	85.4642				177.338	128.338	101.983	73.8043				63.1127	43.9083	136.882	95.2308
	313.049	383.12		50.5563	68.9117		204.267	240.167		177.995	140.983				313.049	260.38	383.12	318.662				50.5563	40.2738	68.9117	54.896				204.267	147.827	240.167	173.807				177.995	123.833	140.983	98.0836
	67.0416	120.811		80.0122	218.421		19.1421	92.0122		38.7279	37.4558				67.0416	55.7623	120.811	100.486				80.0122	63.7388	218.421	173.998				19.1421	13.853	92.0122	66.5887				38.7279	26.9435	37.4558	26.0585
	146.539	169.196		237.35	272.706		52.2132	94.2843		158.61	80.1838				146.539	121.885	169.196	140.73				237.35	189.077	272.706	217.241				52.2132	37.7864	94.2843	68.233				158.61	110.347	80.1838	55.7849
	296.836	115.184		275.51	240.823		52.0833	136.368		45.2132	104.012				296.836	246.895	115.184	95.8049				275.51	219.475	240.823	191.843				52.0833	37.6924	136.368	98.6883				45.2132	31.4554	104.012	72.3627
	40.9706	50.1127		71.3848	758.696		178.64	666.127		153.711	216.882				40.9706	34.0776	50.1127	41.6816				71.3848	56.8661	758.696	604.387				178.64	129.28	666.127	482.072				153.711	106.939	216.882	150.888
	41.4558	189.581		181.723	80.6985		181.782	65.8406		108.882	30.3137				41.4558	34.4811	189.581	157.685				181.723	144.763	80.6985	64.2855				181.782	131.554	65.8406	47.6484				108.882	75.7509	30.3137	21.0896
	168.368	213.267		78.5269	105.598		200.38	98.8406		396.635	84.799				168.368	140.041	213.267	177.386				78.5269	62.5556	105.598	84.1208				200.38	145.014	98.8406	71.5303				396.635	275.944	84.799	58.9958
	55.3848	43.0416		172.823	68.669		60.5269	111.397		192.581	227.735				55.3848	46.0667	43.0416	35.8001				172.823	137.674	68.669	54.7027				60.5269	43.8029	111.397	80.6173				192.581	133.981	227.735	158.438
	39.8701	133.74		115.983	145.539		243.723	422.031		40.799	183.024				39.8701	33.1622	133.74	111.239				115.983	92.3935	145.539	115.938				243.723	176.381	422.031	305.422				40.799	28.3844	183.024	127.332
	73.8701	113.498		101.213	360.463		107.255	31.5563		202.338	160.468				73.8701	61.4419	113.498	94.4023				101.213	80.6278	360.463	287.15				107.255	77.6196	31.5563	22.8371				202.338	140.769	160.468	111.64
	300.191	145.083		60.0416	51.5269		17.0711	139.61		78.6985	209.539				300.191	249.686	145.083	120.674				60.0416	47.83	51.5269	41.047				17.0711	12.3543	139.61	101.035				78.6985	54.7516	209.539	145.779
	54.3848	268.321		111.74	92.9117		68.9411	88.4264		244.936	124.296				54.3848	45.2349	268.321	223.178				111.74	89.0137	92.9117	74.0147				68.9411	49.8923	88.4264	63.9936				244.936	170.405	124.296	86.4747
	98.3259	48.799		71.2843	51.1421		548.257	36.0711		21.8995	102.184				98.3259	81.7832	48.799	40.5889				71.2843	56.7861	51.1421	40.7405				548.257	396.77	36.0711	26.1044				21.8995	15.2358	102.184	71.0906
	173.368	123.953		63.1838	143.569		108.426	202.238		289.681	135.225				173.368	144.2	123.953	103.099				63.1838	50.3331	143.569	114.369				108.426	78.4675	202.238	146.358				289.681	201.535	135.225	94.0781
	36.8701	42.6985		39.3137	64.3553		163.782	95.0833		91.4264	264.409				36.8701	30.667	42.6985	35.5148				39.3137	31.3178	64.3553	51.2663				163.782	118.528	95.0833	68.8112				91.4264	63.6066	264.409	183.953
	104.627	196.48		94.3259	176.338		118.498	131.681		60.3848	262.409				104.627	87.0245	196.48	163.424				94.3259	75.1413	176.338	140.473				118.498	85.7559	131.681	95.2969				60.3848	42.0105	262.409	182.562
	87.0416	165.752		190.723	408.191		38.5563	117.255		181.238	91.1127				87.0416	72.3974	165.752	137.866				190.723	151.932	408.191	325.171				38.5563	27.903	117.255	84.8566				181.238	126.089	91.1127	63.3883
	43.1421	337.179		105.74	296.794		47.5563	227.066		46.6985	102.912				43.1421	35.8837	337.179	280.451				105.74	84.234	296.794	236.43				47.5563	34.4162	227.066	164.326				46.6985	32.4888	102.912	71.597
	38.3848	134.882		322.149	49.799		58.5269	84.3553		156.823	87.8406				38.3848	31.9268	134.882	112.189				322.149	256.629	49.799	39.6706				58.5269	42.3556	84.3553	61.0474				156.823	109.104	87.8406	61.1119
	165.823	267.037		78.2843	121.083		71.2548	43.5563		57.9411	214.995				165.823	137.925	267.037	222.109				78.2843	62.3624	121.083	96.4566				71.2548	51.5667	43.5563	31.5214				57.9411	40.3104	214.995	149.575
	186.225	429.085		272.622	140.74		77.6274	138.024		70.1421	92.9411				186.225	154.894	429.085	356.895				272.622	217.175	140.74	112.116				77.6274	56.1785	138.024	99.8874				70.1421	48.7988	92.9411	64.6603
	56.7696	156.167		216.338	155.581		35.9706	114.125		119.426	108.498				56.7696	47.2185	156.167	129.893				216.338	172.338	155.581	123.938				35.9706	26.0317	114.125	82.5915				119.426	83.0865	108.498	75.4831
	55.5269	197.338		83.5269	137.196		127.225	90.1127		273.007	71.6274				55.5269	46.1849	197.338	164.137				83.5269	66.5387	137.196	109.292				127.225	92.0722	90.1127	65.214				273.007	189.935	71.6274	49.8321
	101.125	232.024		111.054	30.1421		180.225	74.3553		85.2843	123.397				101.125	84.1113	232.024	192.988				111.054	88.467	30.1421	24.0116				180.225	130.428	74.3553	53.8105				85.2843	59.3334	123.397	85.8489
	200.836	394.576		94.669	136.681		523.387	114.77		217.723	145.439				200.836	167.046	394.576	328.191				94.669	75.4146	136.681	108.882				523.387	378.772	114.77	83.0581				217.723	151.473	145.439	101.184
	186.924	611.896		277.409	132.054		67.9706	42.6274		194.095	134.569				186.924	155.475	611.896	508.949				277.409	220.988	132.054	105.196				67.9706	49.1899	42.6274	30.8492				194.095	135.035	134.569	93.6211
	28.7279	141.397		34.5563	100.77		30.1421	89.669		179.681	129.51				28.7279	23.8946	141.397	117.608				34.5563	27.528	100.77	80.2745				30.1421	21.8137	89.669	64.8929				179.681	125.007	129.51	90.1016
	51.2843	106.498		65.2548	35.8995		48.2843	114.811		207.297	328.593				51.2843	42.6561	106.498	88.58				65.2548	51.9829	35.8995	28.598				48.2843	34.9431	114.811	83.0882				207.297	144.219	328.593	228.606
	90.3259	75.799		88.8112	256.752		116.698	144.368		35.2843	145.983				90.3259	75.1292	75.799	63.0463				88.8112	70.7482	256.752	204.532				116.698	84.454	144.368	104.478				35.2843	24.5478	145.983	101.562
	29.2132	98.8406		333.291	174.711		64.3848	134.196		58.9706	234.622				29.2132	24.2983	98.8406	82.2113				333.291	265.505	174.711	139.177				64.3848	46.5949	134.196	97.1168				58.9706	41.0266	234.622	163.23
	125.468	291.551		65.4264	88.3553		192.48	66.1127		87.1127	109.912				125.468	104.359	291.551	242.5				65.4264	52.1196	88.3553	70.3851				192.48	139.297	66.1127	47.8454				87.1127	60.6055	109.912	76.467
	233.581	200.238		72.3553	44.6985		179.439	912.164		178.711	661.713				233.581	194.282	200.238	166.549				72.3553	57.6392	44.6985	35.6074				179.439	129.859	912.164	660.127				178.711	124.331	661.713	460.362
	687.943	126.125		102.669	172.338		115.669	267.681		124.397	178.64				687.943	572.201	126.125	104.905				102.669	81.7875	172.338	137.287				115.669	83.7089	267.681	193.719				124.397	86.5446	178.64	124.282
	88.2254	104.912		67.9411	239.522		190.51	152.125		273.924	160.569				88.2254	73.3821	104.912	87.261				67.9411	54.1228	239.522	190.806				190.51	137.871	152.125	110.092				273.924	190.572	160.569	111.71
	264.794	165.095		145.77	201.64		61.669	87.3259		129.368	127.024				264.794	220.244	165.095	137.319				145.77	116.122	201.64	160.629				61.669	44.6295	87.3259	63.1972				129.368	90.0027	127.024	88.3726
	166.823	250.995		44.1421	60.799		107.64	45.3848		142.368	316.563				166.823	138.756	250.995	208.767				44.1421	35.1642	60.799	48.4333				107.64	77.8981	45.3848	32.8447				142.368	99.0469	316.563	220.237
	177.309	236.25		67.8701	376.392		65.3848	395.019		250.664	41.6274				177.309	147.478	236.25	196.502				67.8701	54.0663	376.392	299.839				65.3848	47.3186	395.019	285.873				250.664	174.39	41.6274	28.9607
	55.598	29.5563		146.397	106.426		356.203	407.191		229.764	92.1543				55.598	46.244	29.5563	24.5836				146.397	116.622	106.426	84.7807				356.203	257.782	407.191	294.682				229.764	159.85	92.1543	64.113
	184.752	255.368		30.1421	119.125		75.4975	226.409		56.6985	203.539				184.752	153.669	255.368	212.404				30.1421	24.0116	119.125	94.8965				75.4975	54.6371	226.409	163.851				56.6985	39.4459	203.539	141.605
	21.0711	62.5269		45.9411	50.7279		171.723	117.267		94.4558	62.598				21.0711	17.526	62.5269	52.0072				45.9411	36.5973	50.7279	40.4105				171.723	124.275	117.267	84.8654				94.4558	65.7141	62.598	43.5503
	124.51	215.167		69.2843	138.125		75.9706	227.936		106.225	30.7279				124.51	103.562	215.167	178.966				69.2843	55.1928	138.125	110.032				75.9706	54.9795	227.936	164.956				106.225	73.9024	30.7279	21.3778
	42.1421	267.22		263.38	119.012		47.9706	38.2132		63.9411	81.0122				42.1421	35.052	267.22	222.262				263.38	209.812	119.012	94.8068				47.9706	34.716	38.2132	27.6547				63.9411	44.4847	81.0122	56.3613
	73.5269	220.965		53.6985	134.468		108.012	32.8995		59.598	88.9411				73.5269	61.1565	220.965	183.79				53.6985	42.777	134.468	107.119				108.012	78.1678	32.8995	23.8092				59.598	41.4631	88.9411	61.8775
	122.255	98.669		36.8995	61.6985		118.569	50.7279		217.238	159.196				122.255	101.686	98.669	82.0686				36.8995	29.3947	61.6985	49.1499				118.569	85.8073	50.7279	36.7115				217.238	151.135	159.196	110.755
	49.6985	26.3137		100.74	337.191		26.7279	84.0538		64.5269	233.652				49.6985	41.3371	26.3137	21.8866				100.74	80.251	337.191	268.611				26.7279	19.3428	84.0538	60.8292				64.5269	44.8922	233.652	162.555
	76.3553	43.6274		81.1543	655.24		319.848	97.4264		112.953	197.125				76.3553	63.509	43.6274	36.2874				81.1543	64.6486	655.24	521.973				319.848	231.472	97.4264	70.5069				112.953	78.5831	197.125	137.142
	105.267	132.711		32.8284	241.48		58.9706	46.5563		13.4853	53.7696				105.267	87.5565	132.711	110.383				32.8284	26.1516	241.48	192.366				58.9706	42.6767	46.5563	33.6925				13.4853	9.3819	53.7696	37.4082
	46.3848	158.054		219.882	49.3553		201.297	137.853		209.51	126.426				46.3848	38.5809	158.054	131.462				219.882	175.161	49.3553	39.3171				201.297	145.677	137.853	99.7632				209.51	145.759	126.426	87.9565
	242.451	222.225		37.3137	71.9706		218.279	223.208		123.326	52.0416				242.451	201.66	222.225	184.837				37.3137	29.7246	71.9706	57.3328				218.279	157.967	223.208	161.534				123.326	85.7995	52.0416	36.206
	143.196	111.711		86.9828	58.9411		68.6274	71.1838		207.965	52.9411				143.196	119.104	111.711	92.9161				86.9828	69.2917	58.9411	46.9533				68.6274	49.6652	71.1838	51.5153				207.965	144.684	52.9411	36.8318
	297.108	425.061		92.5269	348.25		357.919	168.681		135.267	14.4853				297.108	247.121	425.061	353.547				92.5269	73.7082	348.25	277.421				357.919	259.024	168.681	122.074				135.267	94.107	14.4853	10.0776
	204.865	242.823		52.6985	124.368		83.5685	95.4558		114.882	86.669				204.865	170.398	242.823	201.97				52.6985	41.9804	124.368	99.0729				83.5685	60.478	95.4558	69.0808				114.882	79.9251	86.669	60.2968
	106.912	114.669		55.2843	336.848		204.397	94.4558		203.882	71.4558				106.912	88.9245	114.669	95.3767				55.2843	44.0402	336.848	268.338				204.397	147.921	94.4558	68.3571				203.882	141.844	71.4558	49.7127
	50.9411	138.297		304.806	398.25		93.3553	194.238		55.6274	143.64				50.9411	42.3706	138.297	115.029				304.806	242.813	398.25	317.251				93.3553	67.5607	194.238	140.569				55.6274	38.7007	143.64	99.932
	107.74	313.706		63.4558	215.794		114.539	58.3848		342.605	224.125				107.74	89.6135	313.706	260.927				63.4558	50.5498	215.794	171.904				114.539	82.8912	58.3848	42.2527				342.605	238.355	224.125	155.927
	93.5391	162.681		123.498	110.154		105.811	108.841		158.426	104.527				93.5391	77.8018	162.681	135.311				123.498	98.3798	110.154	87.7504				105.811	76.5749	108.841	78.7673				158.426	110.219	104.527	72.7207
	399.103	205.225		101.941	173.439		39.2132	111.225		170.74	51.9706				399.103	331.956	205.225	170.698				101.941	81.2077	173.439	138.164				39.2132	28.3784	111.225	80.4931				170.74	118.786	51.9706	36.1566
	159.255	257.581		58.6985	80.7401		64.0416	108.941		207.409	161.681				159.255	132.461	257.581	214.244				58.6985	46.76	80.7401	64.3187				64.0416	46.3465	108.941	78.84				207.409	144.297	161.681	112.484
	32.9706	174.468		106.74	203.48		119.154	153.368		86.7696	218.368				32.9706	27.4235	174.468	145.115				106.74	85.0306	203.48	162.095				119.154	86.2312	153.368	110.991				86.7696	60.3668	218.368	151.921
	53.3137	99.1543		105.296	116.439		71.0833	128.64		230.48	48.1127				53.3137	44.344	99.1543	82.4722				105.296	83.8806	116.439	92.7566				71.0833	51.4425	128.64	93.0957				230.48	160.348	48.1127	33.4726
	48.3848	239.451		116.498	187.865		121.941	211.965		71.1127	95.8406				48.3848	40.2444	239.451	199.165				116.498	92.8035	187.865	149.656				121.941	88.248	211.965	153.398				71.1127	49.474	95.8406	66.6776
	55.6985	77.9411		270.037	49.6274		42.799	41.8701		138.995	197.681				55.6985	46.3276	77.9411	64.828				270.037	215.115	49.6274	39.5339				42.799	30.9734	41.8701	30.3011				138.995	96.7006	197.681	137.529
	48.4558	135.439		151.539	40.1421		116.225	168.167		399.907	121.397				48.4558	40.3034	135.439	112.652				151.539	120.718	40.1421	31.9778				116.225	84.1116	168.167	121.701				399.907	278.22	121.397	84.4575
	146.368	237.309		154.64	79.0416		66.598	118.498		96.3259	233.095				146.368	121.742	237.309	197.383				154.64	123.188	79.0416	62.9656				66.598	48.1966	118.498	85.7559				96.3259	67.0152	233.095	162.168
	168.297	133.841		65.3553	217.368		56.3137	126.468		87.3848	85.1127				168.297	139.982	133.841	111.323				65.3553	52.0629	217.368	173.158				56.3137	40.7539	126.468	91.5241				87.3848	60.7948	85.1127	59.214
	137.539	271.605		91.9533	353.215		177.723	155.409		251.451	107.811				137.539	114.399	271.605	225.909				91.9533	73.2513	353.215	281.376				177.723	128.617	155.409	112.469				251.451	174.938	107.811	75.0057
	53.3553	92.7696		34.3137	124.953		593.5	146.196		324.522	109.468				53.3553	44.3786	92.7696	77.1617				34.3137	27.3348	124.953	99.5395				593.5	429.512	146.196	105.801				324.522	225.774	109.468	76.1583
	130.397	434.203		333.99	145.652		153.61	136.953		289.38	146.539				130.397	108.459	434.203	361.151				333.99	266.061	145.652	116.028				153.61	111.167	136.953	99.1123				289.38	201.325	146.539	101.949
	228.309	276.522		93.4264	170.569		91.9411	67.2548		150.125	237.309				228.309	189.897	276.522	229.999				93.4264	74.4248	170.569	135.877				91.9411	66.5372	67.2548	48.6719				150.125	104.444	237.309	165.099
	86.3259	262.238		126.054	82.3259		60.1421	32.0416		96.0416	211.894				86.3259	71.8021	262.238	218.118				126.054	100.416	82.3259	65.5819				60.1421	43.5245	32.0416	23.1883				96.0416	66.8174	211.894	147.418
	125.225	170.225		492.63	69.1543		109.498	119.255		141.368	264.238				125.225	104.157	170.225	141.586				492.63	392.435	69.1543	55.0893				109.498	79.2427	119.255	86.304				141.368	98.3512	264.238	183.834
	46.5563	127.941		378.446	249.894		118.912	282.22		39.9706	104.983				46.5563	38.7235	127.941	106.416				378.446	301.475	249.894	199.069				118.912	86.0557	282.22	204.241				39.9706	27.8081	104.983	73.0379
	118.083	197.409		176.782	307.664		36.5563	296.108		340.179	50.6274				118.083	98.2166	197.409	164.196				176.782	140.827	307.664	245.089				36.5563	26.4556	296.108	214.291				340.179	236.667	50.6274	35.2222
	63.7696	324.291		93.4558	600.902		101.74	76.0416		56.9411	112.154				63.7696	53.0408	324.291	269.732				93.4558	74.4482	600.902	478.687				101.74	73.6287	76.0416	55.0308				56.9411	39.6147	112.154	78.0272
	65.9411	267.208		104.426	73.0122		27.8995	280.279		63.9411	150.125				65.9411	54.8469	267.208	222.252				104.426	83.1875	73.0122	58.1625				27.8995	20.1907	280.279	202.836				63.9411	44.4847	150.125	104.444
	48.6274	540.872		116.255	184.468		95.4975	132.255		166.965	187.924				48.6274	40.4462	540.872	449.874				116.255	92.6102	184.468	146.95				95.4975	69.111	132.255	95.712				166.965	116.16	187.924	130.741
	29.3137	192.297		41.799	26.799		130.439	358.274		653.767	68.6274				29.3137	24.3819	192.297	159.944				41.799	33.2977	26.799	21.3485				130.439	94.3976	358.274	259.281				653.767	454.834	68.6274	47.745
	765.394	89.2548		112.397	139.196		344.392	89.468		116.426	67.669				765.394	636.622	89.2548	74.2383				112.397	89.537	139.196	110.885				344.392	249.234	89.468	64.7474				116.426	80.9994	67.669	47.0782
	24.1421	110.355		86.1838	252.137		193.782	213.995		102.054	34.8284				24.1421	20.0804	110.355	91.7888				86.1838	68.6552	252.137	200.856				193.782	140.239	213.995	154.867				102.054	71.0002	34.8284	24.2306
	202.368	31.5563		353.108	310.492		44.4558	231.309		120.811	68.6274				202.368	168.321	31.5563	26.2472				353.108	281.29	310.492	247.343				44.4558	32.1724	231.309	167.397				120.811	84.0499	68.6274	47.745
	117.912	127.841		172.037	190.782		135.225	31.8995		83.4558	71.9411				117.912	98.0738	127.841	106.332				172.037	137.047	190.782	151.979				135.225	97.8618	31.8995	23.0855				83.4558	58.0613	71.9411	50.0504
	75.8701	116.77		69.8701	302.149		884.85	217.983		143.912	108.326				75.8701	63.1055	116.77	97.1239				69.8701	55.6595	302.149	240.696				884.85	640.36	217.983	157.753				143.912	100.121	108.326	75.3638
	70.598	133.326		58.6274	68.2843		70.9411	74.1127		58.4558	110.426				70.598	58.7204	133.326	110.895				58.6274	46.7034	68.2843	54.3962				70.9411	51.3396	74.1127	53.6349				58.4558	40.6685	110.426	76.8251
	66.6274	150.64		129.669	116.983		45.6985	86.0122		127.426	97.0122				66.6274	55.4178	150.64	125.295				129.669	103.296	116.983	93.1901				45.6985	33.0717	86.0122	62.2465				127.426	88.6522	97.0122	67.4927
	41.6274	74.4558		287.409	21.3137		87.397	100.669		56.5563	160.752				41.6274	34.6239	74.4558	61.9291				287.409	228.954	21.3137	16.9788				87.397	63.2487	100.669	72.8535				56.5563	39.347	160.752	111.837
	93.1543	264.279		169.154	40.3848		141.811	93.7696		125.539	31.799				93.1543	77.4817	264.279	219.816				169.154	134.751	40.3848	32.1711				141.811	102.628	93.7696	67.8605				125.539	87.3392	31.799	22.123
	46.5563	227.309		59.1127	29.799		120.853	56.8701		132.498	127.569				46.5563	38.7235	227.309	189.066				59.1127	47.09	29.799	23.7383				120.853	87.4604	56.8701	41.1565				132.498	92.1803	127.569	88.7511
	39.5563	140.74		314.463	254.037		108.054	221.167		128.225	40.4558				39.5563	32.9012	140.74	117.062				314.463	250.506	254.037	202.369				108.054	78.1979	221.167	160.057				128.225	89.2081	40.4558	28.1456
	63.1127	131.225		130.711	247.007		276.166	109.225		157.64	38.9706				63.1127	52.4944	131.225	109.148				130.711	104.126	247.007	196.769				276.166	199.86	109.225	79.0458				157.64	109.672	38.9706	27.1124
	393.877	33.1421		166.983	217.409		100.255	115.368		70.1838	93.2843				393.877	327.61	33.1421	27.5662				166.983	133.021	217.409	173.191				100.255	72.5538	115.368	83.4908				70.1838	48.8278	93.2843	64.8991
	66.2843	122.154		16.4853	139.64		86.1543	236.066		101.426	97.2548				66.2843	55.1324	122.154	101.603				16.4853	13.1324	139.64	111.239				86.1543	62.3493	236.066	170.84				101.426	70.5637	97.2548	67.6614
	159.581	232.48		58.6985	262.166		84.5269	38.6274		128.711	50.1127				159.581	132.732	232.48	193.367				58.6985	46.76	262.166	208.845				84.5269	61.1716	38.6274	27.9544				128.711	89.5457	50.1127	34.8641
	62.5269	48.1127		90.4264	46.2132		185.196	140.225		95.7696	31.1421				62.5269	52.0072	48.1127	40.0181				90.4264	72.0349	46.2132	36.8141				185.196	134.025	140.225	101.48				95.7696	66.6282	31.1421	21.666
	63.8701	29.5563		104.498	660.411		214.309	51.6985		93.8112	126.953				63.8701	53.1244	29.5563	24.5836				104.498	83.2442	660.411	526.093				214.309	155.094	51.6985	37.4139				93.8112	65.2657	126.953	88.3231
	161.853	104.669		131.51	133.669		33.9706	120.397		90.0122	122.468				161.853	134.622	104.669	87.0591				131.51	104.762	133.669	106.483				33.9706	24.5843	120.397	87.1306				90.0122	62.6227	122.468	85.2026
	128.196	150.711		111.953	234.764		36.4558	30.3137		112.711	72.598				128.196	106.628	150.711	125.355				111.953	89.1835	234.764	187.017				36.4558	26.3828	30.3137	21.9378				112.711	78.4143	72.598	50.5074
	91.598	394.647		78.5685	141.953		276.894	212.095		62.9411	113.983				91.598	76.1872	394.647	328.25				78.5685	62.5888	141.953	113.082				276.894	200.387	212.095	153.492				62.9411	43.789	113.983	79.2993
	98.0122	40.0416		44.799	223.693		30.5563	175.066		159.196	20.2426				98.0122	81.5223	40.0416	33.3049				44.799	35.6875	223.693	178.197				30.5563	22.1134	175.066	126.694				159.196	110.755	20.2426	14.083
	29.1421	73.8406		241.397	222.652		174.61	37.5563		73.0122	86.4264				29.1421	24.2391	73.8406	61.4174				241.397	192.3	222.652	177.367				174.61	126.364	37.5563	27.1793				73.0122	50.7956	86.4264	60.128
	119.669	143.125		98.0833	210.924		74.9411	82.0122		268.635	172.711				119.669	99.5355	143.125	119.045				98.0833	78.1345	210.924	168.025				74.9411	54.2344	82.0122	59.3517				268.635	186.893	172.711	120.157
	122.355	116.498		88.9117	229.782		88.598	201.912		137.083	125.539				122.355	101.77	116.498	96.8976				88.9117	70.8283	229.782	183.047				88.598	64.1178	201.912	146.122				137.083	95.3707	125.539	87.3392
	27.4853	151.527		87.0122	465.174		53.2843	223.451		165.581	102.598				27.4853	22.8611	151.527	126.034				87.0122	69.3151	465.174	370.564				53.2843	38.5615	223.451	161.71				165.581	115.197	102.598	71.3788
	232.652	41.2132		57.6274	143.054		47.6569	48.9706		106.385	80.2548				232.652	193.51	41.2132	34.2794				57.6274	45.9068	143.054	113.959				47.6569	34.489	48.9706	35.4397				106.385	74.0133	80.2548	55.8343
	102.882	159.498		136.066	313.735		114.368	96.8406		332.007	159.368				102.882	85.573	159.498	132.663				136.066	108.392	313.735	249.926				114.368	82.7671	96.8406	70.0829				332.007	230.982	159.368	110.874
	175.267	173.894		116.983	238.711		171.569	43.3553		189.752	64.4558				175.267	145.779	173.894	144.638				116.983	93.1901	238.711	190.16				171.569	124.163	43.3553	31.376				189.752	132.013	64.4558	44.8428
	107.225	29.9706		103.598	280.865		217.037	79.3259		43.6274	119.054				107.225	89.1854	29.9706	24.9282				103.598	82.5276	280.865	223.741				217.037	157.068	79.3259	57.4077				43.6274	30.3522	119.054	82.8273
	51.5269	87.7696		39.1421	169.279		84.598	119.61		61.3553	123.782				51.5269	42.8578	87.7696	73.0029				39.1421	31.1811	169.279	134.85				84.598	61.2231	119.61	86.5612				61.3553	42.6857	123.782	86.1166
	41.5563	255.066		82.7696	70.0711		70.6985	77.3553		143.51	246.965				41.5563	34.5647	255.066	212.153				82.7696	65.9354	70.0711	55.8196				70.6985	51.1641	77.3553	55.9816				143.51	99.8416	246.965	171.817
	77.598	157.894		167.64	135.711		440.99	323.593		134.409	127.439				77.598	64.5427	157.894	131.33				167.64	133.544	135.711	108.109				440.99	319.142	323.593	234.182				134.409	93.5103	127.439	88.6607
	95.4975	116.811		16.1421	166.882		64.3137	186.74		76.1838	119.569				95.4975	79.4307	116.811	97.1585				16.1421	12.859	166.882	132.941				64.3137	46.5434	186.74	135.143				76.1838	53.0021	119.569	83.1854
	292.392	35.9706		224.853	164.711		109.841	73.0416		560.203	42.6274				292.392	243.199	35.9706	29.9188				224.853	179.121	164.711	131.211				109.841	79.491	73.0416	52.8598				560.203	389.741	42.6274	29.6564
	67.9706	27.7279		113.598	200.794		233.108	106.154		98.3259	81.9411				67.9706	56.535	27.7279	23.0629				113.598	90.4937	200.794	159.955				233.108	168.699	106.154	76.8232				98.3259	68.4066	81.9411	57.0075
	37.8995	70.1838		81.5269	163.066		230.137	108.368		97.0122	24.8995				37.8995	31.5232	70.1838	58.3758				81.5269	64.9455	163.066	129.901				230.137	166.549	108.368	78.4249				97.0122	67.4927	24.8995	17.3229
	44.8701	124.439		160.498	213.782		187.208	91.8406		83.1838	100.054				44.8701	37.321	124.439	103.503				160.498	127.855	213.782	170.301				187.208	135.481	91.8406	66.4645				83.1838	57.8721	100.054	69.6087
	60.669	106.083		67.8406	175.297		102.426	130.64		165.581	194.024				60.669	50.4618	106.083	88.2355				67.8406	54.0428	175.297	139.644				102.426	74.1254	130.64	94.5431				165.581	115.197	194.024	134.985
	46.3848	242.078		295.581	90.9411		77.9117	72.8406		158.539	138.054				46.3848	38.5809	242.078	201.35				295.581	235.464	90.9411	72.4449				77.9117	56.3842	72.8406	52.7143				158.539	110.298	138.054	96.0458
	229.936	159.297		189.581	86.8406		37.1421	224.48		136.64	116.255				229.936	191.251	159.297	132.496				189.581	151.023	86.8406	69.1784				37.1421	26.8795	224.48	162.455				136.64	95.062	116.255	80.88
	125.853	205.338		105.983	62.3848		93.1543	126.953		91.4975	472.801				125.853	104.679	205.338	170.791				105.983	84.4274	62.3848	49.6966				93.1543	67.4152	126.953	91.8753				91.4975	63.656	472.801	328.934
	65.8406	290.995		30.5563	138.083		149.61	114.569		119.012	113.711				65.8406	54.7634	290.995	242.037				30.5563	24.3416	138.083	109.999				149.61	108.272	114.569	82.9125				119.012	82.7984	113.711	79.11
	128.095	101.912		222.48	95.7696		132.498	72.1838		114.054	122.841				128.095	106.544	101.912	84.7657				222.48	177.231	95.7696	76.2914				132.498	95.8876	72.1838	52.239				114.054	79.3487	122.841	85.4618
	207.167	45.0416		66.0122	103.054		57.0416	19.6569		439.747	41.1421				207.167	172.312	45.0416	37.4636				66.0122	52.5862	103.054	82.0941				57.0416	41.2807	19.6569	14.2256				439.747	305.938	41.1421	28.6231
	31.2843	104.711		228.865	467.718		468.688	54.3137		172.539	127.61				31.2843	26.0209	104.711	87.0938				228.865	182.317	467.718	372.59				468.688	339.187	54.3137	39.3065				172.539	120.038	127.61	88.7801
	57.5269	242.338		79.2843	130.61		125.811	56.5269		112.326	36.799				57.5269	47.8484	242.338	201.566				79.2843	63.159	130.61	104.046				125.811	91.0488	56.5269	40.9082				112.326	78.1466	36.799	25.6015
	222.823	239.823		134.024	19.2426		117.368	56.1127		49.4558	159.095				222.823	185.335	239.823	199.475				134.024	106.766	19.2426	15.3289				117.368	84.9381	56.1127	40.6084				49.4558	34.4071	159.095	110.685
	64.4558	58.6985		241.723	185.037		61.1127	106.841		91.669	126.083				64.4558	53.6115	58.6985	48.8229				241.723	192.56	185.037	147.403				61.1127	44.2269	106.841	77.3199				91.669	63.7753	126.083	87.7178
	406.747	44.3553		82.2548	685.914		154.64	99.0833		142.669	57.5563				406.747	338.315	44.3553	36.8928				82.2548	65.5253	685.914	546.408				154.64	111.912	99.0833	71.706				142.669	99.2567	57.5563	40.0427
	81.2548	114.326		54.1421	287.865		267.936	158.125		153.64	139.297				81.2548	67.5842	114.326	95.0913				54.1421	43.1303	287.865	229.317				267.936	193.904	158.125	114.434				153.64	106.889	139.297	96.9104
	353.647	125.012		49.5269	181.368		79.8995	73.4558		83.5269	71.5269				353.647	294.148	125.012	103.98				49.5269	39.4538	181.368	144.48				79.8995	57.8228	73.4558	53.1595				83.5269	58.1108	71.5269	49.7622
	118.912	146.368		76.0122	321.132		112.841	247.196		242.078	147.811				118.912	98.9056	146.368	121.742				76.0122	60.5524	321.132	255.818				112.841	81.662	247.196	178.894				242.078	168.417	147.811	102.834
	45.0416	195.581		96.2254	135.853		100.711	138.539		98.397	78.4558				45.0416	37.4636	195.581	162.676				96.2254	76.6545	135.853	108.222				100.711	72.8837	138.539	100.26				98.397	68.4561	78.4558	54.5827
	32.5563	67.6985		60.9411	60.2843		108.64	134.669		47.6569	162.267				32.5563	27.0789	67.6985	56.3087				60.9411	48.5465	60.2843	48.0233				108.64	78.6218	134.669	97.4591				47.6569	33.1555	162.267	112.891
	56.6985	19.0711		38.8701	88.1838		87.7696	336.007		332.25	106.083				56.6985	47.1594	19.0711	15.8625				38.8701	30.9645	88.1838	70.2484				87.7696	63.5183	336.007	243.166				332.25	231.151	106.083	73.8036
	84.5269	109.083		36.1421	39.1127		238.309	31.2132		127.983	204.924				84.5269	70.3058	109.083	90.7308				36.1421	28.7913	39.1127	31.1577				238.309	172.463	31.2132	22.5888				127.983	89.0393	204.924	142.568
	28.3848	171.196		69.1543	190.894		163.539	112.439		59.9411	143.196				28.3848	23.6092	171.196	142.393				69.1543	55.0893	190.894	152.069				163.539	118.352	112.439	81.3711				59.9411	41.7018	143.196	99.6233
	136.498	145.468		83.6274	137.468		34.4142	32.799		149.681	47.0416				136.498	113.533	145.468	120.994				83.6274	66.6187	137.468	109.509				34.4142	24.9053	32.799	23.7364				149.681	104.135	47.0416	32.7275
	224.267	138.267		121.355	223.421		162.711	190.024		94.2548	67.4558				224.267	186.536	138.267	115.004				121.355	96.6733	223.421	177.981				162.711	117.753	190.024	137.519				94.2548	65.5743	67.4558	46.9299
	68.6274	117.184		360.12	279.024		61.7696	98.598		98.3259	60.6274				68.6274	57.0813	117.184	97.4684				360.12	286.876	279.024	222.275				61.7696	44.7023	98.598	71.3548				98.3259	68.4066	60.6274	42.1793
	96.3259	70.2548		128.841	239.037		185.338	40.799		617.399	403.007				96.3259	80.1197	70.2548	58.4349				128.841	102.636	239.037	190.42				185.338	134.128	40.799	29.526				617.399	429.533	403.007	280.377
	100.012	76.4975		179.794	67.9706		75.0416	88.8112		103.64	126.77				100.012	83.1858	76.4975	63.6273				179.794	143.226	67.9706	54.1463				75.0416	54.3071	88.8112	64.2721				103.64	72.1034	126.77	88.1953
	134.095	206.652		203.924	65.3553		170.338	183.652		76.3848	53.7696				134.095	111.535	206.652	171.884				203.924	162.449	65.3553	52.0629				170.338	123.273	183.652	132.908				76.3848	53.1419	53.7696	37.4082
	128.569	173.468		75.8406	95.7696		191.622	144.225		149.397	124.811				128.569	106.938	173.468	144.283				75.8406	60.4157	95.7696	76.2914				191.622	138.676	144.225	104.375				149.397	103.937	124.811	86.8328
	78.5269	186.681		98.2843	164.225		241.752	23.2426		152.811	149.782				78.5269	65.3153	186.681	155.273				98.2843	78.2946	164.225	130.824				241.752	174.955	23.2426	16.8205				152.811	106.313	149.782	104.205
	131.782	57.2132		112.154	124.326		33.9706	213.25		202.853	177.752				131.782	109.61	57.2132	47.5875				112.154	89.3437	124.326	99.0397				33.9706	24.5843	213.25	154.328				202.853	141.127	177.752	123.665
	385.463	67.7696		70.3848	63.4558		89.0416	93.4975		46.6274	199.037				385.463	320.611	67.7696	56.3678				70.3848	56.0695	63.4558	50.5498				89.0416	64.4389	93.4975	67.6636				46.6274	32.4393	199.037	138.472
	80.1838	108.368		62.6274	203.208		123.669	52.8701		117.468	225.593				80.1838	66.6934	108.368	90.1354				62.6274	49.8899	203.208	161.878				123.669	89.4985	52.8701	38.2618				117.468	81.724	225.593	156.948
	99.598	59.6985		62.2132	102.74		104.255	111.083		36.4142	249.309				99.598	82.8413	59.6985	49.6546				62.2132	49.5599	102.74	81.8442				104.255	75.4486	111.083	80.3903				36.4142	25.3338	249.309	173.447
	77.4264	107.74		354.593	191.309		78.0416	344.919		106.841	35.9706				77.4264	64.3999	107.74	89.6135				354.593	282.474	191.309	152.399				78.0416	56.4782	344.919	249.616				106.841	74.3304	35.9706	25.0252
	101.426	64.8701		67.3553	187.61		141.326	98.8406		175.593	59.3553				101.426	84.3621	64.8701	53.9561				67.3553	53.6562	187.61	149.453				141.326	102.277	98.8406	71.5303				175.593	122.162	59.3553	41.2943
	87.3553	253.965		29.8995	227.882		28.1421	505.002		23.5563	89.8701				87.3553	72.6583	253.965	211.237				29.8995	23.8184	227.882	181.534				28.1421	20.3663	505.002	365.467				23.5563	16.3884	89.8701	62.5238
	89.5685	168.468		48.0416	240.681		79.5269	172.853		135.397	288.12				89.5685	74.4992	168.468	140.124				48.0416	38.2706	240.681	191.73				79.5269	57.5531	172.853	125.093				135.397	94.1975	288.12	200.449
	159.853	473.86		331.505	47.8701		47.3848	99.598		103.77	140.167				159.853	132.959	473.86	394.136				331.505	264.081	47.8701	38.134				47.3848	34.2921	99.598	72.0785				103.77	72.1939	140.167	97.5157
	65.2548	27.4853		78.1543	119.841		56.0416	128.397		82.1127	83.7401				65.2548	54.2761	27.4853	22.8611				78.1543	62.2588	119.841	95.4667				56.0416	40.557	128.397	92.9201				82.1127	57.1269	83.7401	58.2591
	118.953	251.421		83.0122	61.4558		109.912	108.569		51.3553	123.083				118.953	98.9402	251.421	209.121				83.0122	66.1287	61.4558	48.9565				109.912	79.5424	108.569	78.5704				51.3553	35.7286	123.083	85.6307
	69.8406	102.468		38.3848	63.1127		162.61	87.9706		123.196	142.782				69.8406	58.0904	102.468	85.2284				38.3848	30.5779	63.1127	50.2764				162.61	117.68	87.9706	63.6638				123.196	85.7091	142.782	99.3351
	35.9706	162.338		41.2132	90.397		162.409	67.7696		87.669	75.9411				35.9706	29.9188	162.338	135.026				41.2132	32.831	90.397	72.0115				162.409	117.535	67.7696	49.0444				87.669	60.9925	75.9411	52.8332
	69.5269	151.983		48.2132	31.6274		64.1421	96.4975		70.6985	37.2132				69.5269	57.8295	151.983	126.413				48.2132	38.4073	31.6274	25.1948				64.1421	46.4192	96.4975	69.8346				70.6985	49.1859	37.2132	25.8897
	129.498	141.338		122.296	138.154		183.953	211.439		136.297	260.924				129.498	107.71	141.338	117.559				122.296	97.4231	138.154	110.056				183.953	133.126	211.439	153.017				136.297	94.8233	260.924	181.528
	43.8995	238.279		74.1838	191.439		128.012	52.2132		148.882	146.782				43.8995	36.5137	238.279	198.19				74.1838	59.0958	191.439	152.503				128.012	92.6416	52.2132	37.7864				148.882	103.579	146.782	102.118
	67.2843	210.024		57.5563	64.2843		298.007	109.284		123.468	182.853				67.2843	55.9642	210.024	174.689				57.5563	45.8501	64.2843	51.2098				298.007	215.666	109.284	79.0884				123.468	85.8983	182.853	127.213
	91.598	166.581		147.439	127.368		308.492	158.882		187.037	362.693				91.598	76.1872	166.581	138.555				147.439	117.452	127.368	101.463				308.492	223.254	158.882	114.982				187.037	130.124	362.693	252.331
	16.6569	451.617		185.995	227.965		188.024	139.983		36.7279	93.2843				16.6569	13.8545	451.617	375.636				185.995	148.166	227.965	181.6				188.024	136.072	139.983	101.305				36.7279	25.5521	93.2843	64.8991
	158.238	204.238		144.196	177.024		216.723	84.1838		240.551	83.4264				158.238	131.615	204.238	169.876				144.196	114.869	177.024	141.02				216.723	156.841	84.1838	60.9233				240.551	167.355	83.4264	58.0408
	20.6569	152.024		236.095	129.681		30.3848	529.517		243.681	35.6569				20.6569	17.1815	152.024	126.447				236.095	188.077	129.681	103.306				30.3848	21.9893	529.517	383.208				243.681	169.532	35.6569	24.807
	113.426	180.782		89.7401	57.8701		95.0538	176.125		185.267	123.024				113.426	94.3432	180.782	150.366				89.7401	71.4882	57.8701	46.1001				95.0538	68.7899	176.125	127.461				185.267	128.893	123.024	85.5897
	107.296	102.912		148.811	78.8406		115.355	108.225		65.799	227.907				107.296	89.2446	102.912	85.5975				148.811	118.545	78.8406	62.8055				115.355	83.4819	108.225	78.3221				65.799	45.7772	227.907	158.558
	477.747	548.014		128.498	42.6274		229.693	106.912		67.3553	49.2132				477.747	397.369	548.014	455.815				128.498	102.363	42.6274	33.9576				229.693	166.228	106.912	77.3713				67.3553	46.86	49.2132	34.2383
	69.2843	133.397		219.61	177.012		274.137	72.2548		159.894	81.9411				69.2843	57.6277	133.397	110.954				219.61	174.945	177.012	141.01				274.137	198.391	72.2548	52.2904				159.894	111.241	81.9411	57.0075
	99.1543	178.782		97.1838	27.1421		109.012	193.723		173.297	65.7696				99.1543	82.4722	178.782	148.703				97.1838	77.418	27.1421	21.6218				109.012	78.8915	193.723	140.196				173.297	120.565	65.7696	45.7568
	255.439	240.522		94.7401	234.451		103.397	52.6985		88.1838	85.3553				255.439	212.463	240.522	200.056				94.7401	75.4713	234.451	186.767				103.397	74.8278	52.6985	38.1376				88.1838	61.3506	85.3553	59.3828
	59.7279	102.397		80.4975	108.125		131.711	192.752		94.4264	138.225				59.7279	49.6791	102.397	85.1694				80.4975	64.1254	108.125	86.1338				131.711	95.3182	192.752	139.494				94.4264	65.6937	138.225	96.1652
	142.811	86.4558		45.3848	82.1838		82.7696	36.5563		295.593	88.6274				142.811	118.784	86.4558	71.9102				45.3848	36.1542	82.1838	65.4688				82.7696	59.8999	36.5563	26.4556				295.593	205.648	88.6274	61.6593
	76.0122	258.764		94.1127	61.9411		47.5563	115.669		118.912	204.752				76.0122	63.2237	258.764	215.229				94.1127	74.9715	61.9411	49.3431				47.5563	34.4162	115.669	83.7089				118.912	82.7284	204.752	142.449
	102.74	115.154		120.225	159.51		179.752	104.184		100.598	81.7696				102.74	85.4548	115.154	95.7804				120.225	95.7732	159.51	127.068				179.752	130.086	104.184	75.3972				100.598	69.9874	81.7696	56.8882
	158.983	138.953		62.9411	211.823		280.421	43.7279		147.983	60.3553				158.983	132.235	138.953	115.575				62.9411	50.1397	211.823	168.741				280.421	202.939	43.7279	31.6456				147.983	102.954	60.3553	41.99
	99.196	96.1838		64.4558	601.215		137.095	182.409		280.421	58.3137				99.196	82.5069	96.1838	80.0015				64.4558	51.3464	601.215	478.936				137.095	99.2152	182.409	132.008				280.421	195.093	58.3137	40.5696
	87.5685	92.2548		272.894	285.848		181.581	145.196		84.4264	181.054				87.5685	72.8357	92.2548	76.7335				272.894	217.391	285.848	227.71				181.581	131.409	145.196	105.077				84.4264	58.7366	181.054	125.962
	112.912	16.3137		108.426	313.752		54.598	74.9411		40.9706	153.338				112.912	93.9151	16.3137	13.569				108.426	86.374	313.752	249.939				54.598	39.5122	74.9411	54.2344				40.9706	28.5038	153.338	106.679
	48.0416	179.054		167.681	127.267		317.108	92.2548		320.563	41.4558				48.0416	39.9589	179.054	148.929				167.681	133.577	127.267	101.383				317.108	229.489	92.2548	66.7642				320.563	223.02	41.4558	28.8413
	63.6274	128.498		145.811	114.77		168.066	131.498		156.953	97.2132				63.6274	52.9225	128.498	106.879				145.811	116.155	114.77	91.427				168.066	121.628	131.498	95.1639				156.953	109.194	97.2132	67.6325
	148.681	270.794		78.7696	316.978		107.841	362.233		61.799	36.2132				148.681	123.667	270.794	225.235				78.7696	62.749	316.978	252.509				107.841	78.0436	362.233	262.145				61.799	42.9944	36.2132	25.194
	110.87	91.598		223.581	236.38		156.711	118.468		83.6274	54.8701				110.87	92.2169	91.598	76.1872				223.581	178.107	236.38	188.303				156.711	113.411	118.468	85.7346				83.6274	58.1807	54.8701	38.1739
	87.8823	31.1421		37.3137	190.48		80.6274	298.894		380.848	78.3259				87.8823	73.0967	31.1421	25.9026				37.3137	29.7246	190.48	151.739				80.6274	58.3496	298.894	216.308				380.848	264.961	78.3259	54.4924
	68.9706	109.468		53.6274	303.179		232.037	220.208		91.0122	239.965				68.9706	57.3668	109.468	91.0507				53.6274	42.7203	303.179	241.516				232.037	167.923	220.208	159.363				91.0122	63.3184	239.965	166.947
	116.841	135.912		170.782	38.2132		27.3137	141.024		98.4264	32.1421				116.841	97.1829	135.912	113.045				170.782	136.047	38.2132	30.4412				27.3137	19.7668	141.024	102.058				98.4264	68.4765	32.1421	22.3617
	124.882	193.794		59.2132	204.137		60.0833	134.51		175.924	131.083				124.882	103.872	193.794	161.189				59.2132	47.1701	204.137	162.618				60.0833	43.4819	134.51	97.3438				175.924	122.393	131.083	91.1964
	209.066	123.439		159.48	259.037		223.297	113.255		140.338	208.74				209.066	173.892	123.439	102.671				159.48	127.044	259.037	206.352				223.297	161.598	113.255	81.9618				140.338	97.6351	208.74	145.223
	19.6569	218.924		68.6985	375.693		64.4558	59.3137		242.622	366.061				19.6569	16.3498	218.924	182.091				68.6985	54.7262	375.693	299.283				64.4558	46.6463	59.3137	42.925				242.622	168.796	366.061	254.673
	22.6569	179.267		65.1838	361.659		475.103	438.576		72.8701	164.338				22.6569	18.845	179.267	149.107				65.1838	51.9263	361.659	288.102				475.103	343.829	438.576	317.395				72.8701	50.6967	164.338	114.332
	154.569	87.4264		86.3259	66.3553		56.5563	101.912		74.5269	348.179				154.569	128.563	87.4264	72.7175				86.3259	68.7684	66.3553	52.8595				56.5563	40.9294	101.912	73.7529				74.5269	51.8493	348.179	242.233
	116.113	131.326		244.38	219.037		226.61	93.8406		44.799	114.811				116.113	96.5775	131.326	109.231				244.38	194.676	219.037	174.488				226.61	163.996	93.8406	67.9119				44.799	31.1673	114.811	79.8757
	115.711	189.51		54.4558	410.149		265.593	161.196		21.4853	186.811				115.711	96.2431	189.51	157.626				54.4558	43.3802	410.149	326.731				265.593	192.208	161.196	116.657				21.4853	14.9476	186.811	129.967
	198.38	175.267		72.2843	279.208		96.7401	24.3137		176.297	260.35				198.38	165.004	175.267	145.779				72.2843	57.5827	279.208	222.421				96.7401	70.0102	24.3137	17.5957				176.297	122.652	260.35	181.129
	104.912	247.066		85.0122	38.0416		129.255	289.563		404.002	46.6274				104.912	87.261	247.066	205.499				85.0122	67.7219	38.0416	30.3045				129.255	93.5409	289.563	209.555				404.002	281.07	46.6274	32.4393
	108.355	142.811		73.3553	285.735		141.953	55.3848		229.338	98.9117				108.355	90.1252	142.811	118.784				73.3553	58.4358	285.735	227.621				141.953	102.731	55.3848	40.0816				229.338	159.554	98.9117	68.8142
	92.598	437.463		37.1421	263.179		60.598	97.669		114.083	113.811				92.598	77.019	437.463	363.863				37.1421	29.5879	263.179	209.652				60.598	43.8544	97.669	70.6825				114.083	79.3693	113.811	79.18
	129.184	162.853		185.882	421.848		160.297	164.024		64.8701	176.723				129.184	107.449	162.853	135.454				185.882	148.076	421.848	336.05				160.297	116.006	164.024	118.703				64.8701	45.131	176.723	122.948
	34.1421	105.468		119.498	72.2132		91.6396	127.941		67.2132	69.2548				34.1421	28.3979	105.468	87.7237				119.498	95.1934	72.2132	57.526				91.6396	66.319	127.941	92.5902				67.2132	46.7611	69.2548	48.1815
	105.355	183.51		53.1421	104.255		180.74	80.7696		45.4853	114.468				105.355	87.63	183.51	152.635				53.1421	42.3337	104.255	83.0508				180.74	130.801	80.7696	58.4525				45.4853	31.6447	114.468	79.6369
	82.4975	206.066		92.669	205.439		93.3259	70.0833		32.3848	158.64				82.4975	68.6178	206.066	171.397				92.669	73.8214	205.439	163.655				93.3259	67.5394	70.0833	50.7189				32.3848	22.5305	158.64	110.368
	118.255	149.64		174.095	198.51		117.953	47.5563		109.811	56.8701				118.255	98.3592	149.64	124.464				174.095	138.687	198.51	158.136				117.953	85.3621	47.5563	34.4162				109.811	76.3971	56.8701	39.5653
	29.8995	109.024		102.811	216.794		77.1127	147.184		451.291	181.066				29.8995	24.8691	109.024	90.6818				102.811	81.9008	216.794	172.701				77.1127	55.806	147.184	106.516				451.291	313.969	181.066	125.97
	38.9706	30.9706		222.622	243.622		331.522	100.397		270.877	188.279				38.9706	32.4141	30.9706	25.76				222.622	177.344	243.622	194.073				331.522	239.92	100.397	72.6567				270.877	188.453	188.279	130.988
	80.3848	39.799		86.5269	140.054		129.024	147.74		41.4853	173.752				80.3848	66.8606	39.799	33.1031				86.5269	68.9285	140.054	111.569				129.024	93.3742	147.74	106.919				41.4853	28.8619	173.752	120.882
	84.8701	191.752		45.4853	288.681		155.439	316.078		73.1127	84.3553				84.8701	70.5913	191.752	159.491				45.4853	36.2342	288.681	229.967				155.439	112.49	316.078	228.744				73.1127	50.8655	84.3553	58.6871
	148.196	199.208		86.9117	96.9411		244.38	396.877		49.7279	200.622				148.196	123.263	199.208	165.693				86.9117	69.2351	96.9411	77.2246				244.38	176.856	396.877	287.218				49.7279	34.5964	200.622	139.576
	67.0122	95.0122		46.7279	233.711		93.5269	123.468		100.184	94.598				67.0122	55.7378	95.0122	79.027				46.7279	37.2241	233.711	186.177				93.5269	67.6848	123.468	89.353				100.184	69.6992	94.598	65.8131
	275.433	95.5269		24.7279	50.0416		65.2132	114.983		96.598	253.877				275.433	229.094	95.5269	79.4551				24.7279	19.6986	50.0416	39.8638				65.2132	47.1944	114.983	83.2123				96.598	67.2045	253.877	176.626
	83.7696	207.853		98.7401	138.397		68.4558	503.688		282.12	385.12				83.7696	69.6759	207.853	172.883				98.7401	78.6577	138.397	110.249				68.4558	49.541	503.688	364.516				282.12	196.274	385.12	267.933
	20.4853	153.811		51.7279	233.137		630.553	180.137		540.831	172.882				20.4853	17.0388	153.811	127.933				51.7279	41.2072	233.137	185.72				630.553	456.328	180.137	130.364				540.831	376.263	172.882	120.276
	144.841	196.468		188.924	113.711		132.51	124.841		34.0711	320.794				144.841	120.472	196.468	163.414				188.924	150.499	113.711	90.5835				132.51	95.8965	124.841	90.3464				34.0711	23.7037	320.794	223.181
	193.823	150.74		202.397	119.296		152.64	48.9706		139.882	105.912				193.823	161.214	150.74	125.379				202.397	161.232	119.296	95.0332				152.64	110.464	48.9706	35.4397				139.882	97.318	105.912	73.6842
	42.3848	64.2548		99.4264	167.61		190.368	106.397		224.338	186.255				42.3848	35.2538	64.2548	53.4444				99.4264	79.2044	167.61	133.521				190.368	137.768	106.397	76.9989				224.338	156.075	186.255	129.58
	68.4558	155.853		110.024	118.355		252.037	95.9411		143.368	362.836				68.4558	56.9386	155.853	129.632				110.024	87.647	118.355	94.2835				252.037	182.397	95.9411	69.432				143.368	99.7427	362.836	252.43
	39.4558	28.4558		51.6274	75.5563		106.983	56.2132		123.125	44.6274				39.4558	32.8176	28.4558	23.6683				51.6274	41.1271	75.5563	60.1892				106.983	77.4228	56.2132	40.6811				123.125	85.6596	44.6274	31.0479
	154.681	197.652		36.799	30.3848		90.9117	177.196		122.284	663.257				154.681	128.657	197.652	164.398				36.799	29.3146	30.3848	24.205				90.9117	65.7922	177.196	128.236				122.284	85.0748	663.257	461.437
	144.468	170.681		35.8701	216.569		110.941	53.9411		115.184	165.669				144.468	120.162	170.681	141.965				35.8701	28.5746	216.569	172.521				110.941	80.2874	53.9411	39.0368				115.184	80.1349	165.669	115.258
	143.87	252.338		74.799	42.0416		94.397	84.4558		217.965	75.0833				143.87	119.665	252.338	209.884				74.799	59.5859	42.0416	33.4909				94.397	68.3145	84.4558	61.1201				217.965	151.641	75.0833	52.2364
	141.439	222.539		92.2132	316.363		80.1127	144.196		88.0122	76.598				141.439	117.642	222.539	185.098				92.2132	73.4583	316.363	252.019				80.1127	57.9771	144.196	104.354				88.0122	61.2312	76.598	53.2902
	95.0538	38.5563		165.782	156.965		73.0416	119.368		64.5685	83.5563				95.0538	79.0616	38.5563	32.0695				165.782	132.064	156.965	125.041				73.0416	52.8598	119.368	86.3855				64.5685	44.9212	83.5563	58.1312
	74.7401	167.539		43.9706	62.5269		63.8701	154.823		137.468	180.64				74.7401	62.1656	167.539	139.352				43.9706	35.0276	62.5269	49.8098				63.8701	46.2224	154.823	112.045				137.468	95.6383	180.64	125.673
	112.255	21.3137		19.7279	58.2132		92.5269	69.4264		19.4853	222.48				112.255	93.3687	21.3137	17.7278				19.7279	15.7155	58.2132	46.3734				92.5269	66.9611	69.4264	50.2435				19.4853	13.5562	222.48	154.782
	62.5563	120.64		49.4558	75.9117		129.782	122.539		82.4264	217.581				62.5563	52.0316	120.64	100.343				49.4558	39.3972	75.9117	60.4723				129.782	93.9222	122.539	88.6808				82.4264	57.3451	217.581	151.374
	81.8406	40.2132		67.669	259.137		76.6985	395.676		485.73	93.1127				81.8406	68.0715	40.2132	33.4476				67.669	53.9061	259.137	206.432				76.6985	55.5062	395.676	286.348				485.73	337.929	93.1127	64.7797
	38.6985	72.4264		204.965	233.238		35.9706	18.6569		114.669	138.64				38.6985	32.1877	72.4264	60.2411				204.965	163.278	233.238	185.8				35.9706	26.0317	18.6569	13.5019				114.669	79.7767	138.64	96.4534
	78.598	175.74		160.297	30.8284		62.2843	218.652		38.2132	80.9117				78.598	65.3744	175.74	146.173				160.297	127.694	30.8284	24.5583				62.2843	45.0748	218.652	158.237				38.2132	26.5854	80.9117	56.2913
	64.6985	77.6274		225.238	74.2132		131.024	166.024		47.9706	63.1127				64.6985	53.8134	77.6274	64.5671				225.238	179.427	74.2132	59.1193				131.024	94.8216	166.024	120.151				47.9706	33.3738	63.1127	43.9083
	161.468	159.61		273.907	59.1838		77.4558	161.267		397.961	69.6985				161.468	134.302	159.61	132.757				273.907	218.198	59.1838	47.1466		Culture 2		77.4558	56.0543	161.267	116.708				397.961	276.866	69.6985	48.4902
culture 2	47.9411	34.2132	culture 2	54.7696	26.7279	culture 2	43.2132	99.1127	culture 2	248.723	192.439		mean 0mM MCD ctrl	125.62	47.9411	38.1636	34.2132	27.2355		mean 0,5mM MCD ctrl	122.186	54.7696	44.8249	26.7279	21.8748		mean 1mM MCD ctrl	137.642	43.2132	31.3953	99.1127	72.0074		mean 1,5mM MCD ctrl	139.643	248.723	178.114	192.439	137.808
	37.8995	248.681		321.635	234.35		645.085	101.184		196.054	75.2843		mean normalized 0mM MCD ctrl	100	37.8995	30.1699	248.681	197.963		mean normalized 0,5mM MCD ctrl	100	321.635	263.235	234.35	191.799		mean normalized 1mM MCD ctrl	100	645.085	468.667	101.184	73.5121		mean normalized 1,5mM MCD ctrl	100	196.054	140.397	75.2843	53.9121
	38.4853	80.669		62.6985	45.2843		74.6985	104.983		109.811	43.9706		mean normalized 0mM MCD sema3E	131.537	38.4853	30.6363	80.669	64.2167		mean normalized 0,5mM MCD sema3E	151.987	62.6985	51.3142	45.2843	37.0619		mean normalized 1mM MCD sema3E	107.779	74.6985	54.27	104.983	76.2721		mean normalized 1,5mM MCD sema3E	102.08	109.811	78.6373	43.9706	31.4879
	43.9706	276.007		1022.32	38.6274		75.0833	128.154		79.9828	180.995				43.9706	35.0028	276.007	219.716				1022.32	836.693	38.6274	31.6137				75.0833	54.5495	128.154	93.1067				79.9828	57.2768	180.995	129.613
	32.3848	143.711		52.1127	165.48		66.7279	183.267		124.225	161.267				32.3848	25.78	143.711	114.401				52.1127	42.6505	165.48	135.434				66.7279	48.4792	183.267	133.147				124.225	88.9595	161.267	115.485
	139.125	206.622		137.297	123.296		76.5269	111.811		229.764	136.054				139.125	110.751	206.622	164.482				137.297	112.367	123.296	100.909				76.5269	55.5983	111.811	81.2331				229.764	164.537	136.054	97.43
	257.64	172.882		156.61	78.8406		154.953	124.841		238.38	144.782				257.64	205.094	172.882	137.623				156.61	128.174	78.8406	64.5253				154.953	112.577	124.841	90.6992				238.38	170.707	144.782	103.68
	411.333	237.35		41.7279	167.439		95.669	197.894		78.3137	84.4264				411.333	327.442	237.35	188.943				41.7279	34.1513	167.439	137.036				95.669	69.5054	197.894	143.774				78.3137	56.0815	84.4264	60.4589
	129.468	109.397		90.8406	172.983		39.1421	228.397		69.1421	87.7401				129.468	103.063	109.397	87.0856				90.8406	74.3464	172.983	141.574				39.1421	28.4375	228.397	165.935				69.1421	49.5136	87.7401	62.8319
	92.598	43.6274		28.7279	388.375		151.912	171.811		118.468	160.64				92.598	73.7127	43.6274	34.7296				28.7279	23.5117	388.375	317.857				151.912	110.367	171.811	124.824				118.468	84.8365	160.64	115.036
	90.1838	187.865		116.326	87.1543		40.6274	47.799		109.468	90.0416				90.1838	71.7909	187.865	149.55				116.326	95.2043	87.1543	71.3295				40.6274	29.5166	47.799	34.7269				109.468	78.3915	90.0416	64.48
	101.012	190.681		80.7696	182.823		230.279	82.3553		53.799	90.598				101.012	80.4109	190.681	151.792				80.7696	66.1041	182.823	149.628				230.279	167.302	82.3553	59.8328				53.799	38.5262	90.598	64.8784
	70.598	404.505		49.0416	174.61		230.35	154.681		87.1543	152.468				70.598	56.1996	404.505	322.006				49.0416	40.137	174.61	142.906				230.35	167.354	154.681	112.379				87.1543	62.4124	152.468	109.184
	66.598	260.936		67.3848	189.936		133.882	372.12		174.397	233.806				66.598	53.0154	260.936	207.718				67.3848	55.1496	189.936	155.449				133.882	97.2682	372.12	270.352				174.397	124.888	233.806	167.432
	31.8995	89.7696		369.357	191.338		129.941	109.882		64.3553	15.4853				31.8995	25.3936	89.7696	71.4612				369.357	302.292	191.338	156.596				129.941	94.4048	109.882	79.8317				64.3553	46.0857	15.4853	11.0892
	111.87	172.368		54.6274	50.799		157.539	62.8701		177.468	132.711				111.87	89.0543	172.368	137.213				54.6274	44.7086	50.799	41.5753				157.539	114.455	62.8701	45.6764				177.468	127.087	132.711	95.0359
	125.64	183.64		47.3137	222.551		222.51	146.012		88.2132	20.4853				125.64	100.016	183.64	146.187				47.3137	38.7228	222.551	182.142				222.51	161.658	146.012	106.081				88.2132	63.1707	20.4853	14.6698
	140.225	262.948		110.61	91.2843		266.966	123.74		55.1127	290.563				140.225	111.627	262.948	209.32				110.61	90.5264	91.2843	74.7096				266.966	193.956	123.74	89.8997				55.1127	39.4669	290.563	208.076
	108.225	138.598		531.215	44.8701		81.2548	98.397		92.5685	111.912				108.225	86.153	138.598	110.331				531.215	434.761	44.8701	36.7229				81.2548	59.0332	98.397	71.4874				92.5685	66.2896	111.912	80.1415
	119.669	242.196		60.4558	54.799		144.995	237.463		445.889	122.953				119.669	95.2626	242.196	192.8				60.4558	49.4787	54.799	44.849				144.995	105.342	237.463	172.522				445.889	319.307	122.953	88.0485
	37.2132	168.61		36.799	183.581		107.196	67.1127		162.894	131.338				37.2132	29.6236	168.61	134.222				36.799	30.1173	183.581	150.247				107.196	77.88	67.1127	48.7587				162.894	116.651	131.338	94.053
	85.7696	345.078		107.468	157.711		94.9411	158.167		107.397	155.581				85.7696	68.277	345.078	274.7				107.468	87.9548	157.711	129.075				94.9411	68.9766	158.167	114.911				107.397	76.9084	155.581	111.413
	145.225	37.8995		70.6985	371.12		82.4264	21.3137		73.5269	80.4975				145.225	115.607	37.8995	30.1699				70.6985	57.8616	371.12	303.735				82.4264	59.8844	21.3137	15.4848				73.5269	52.6536	80.4975	57.6453
	463.659	78.4264		71.9411	115.598		73.3848	88.4975		119.539	67.1543				463.659	369.096	78.4264	62.4314				71.9411	58.8786	115.598	94.6086				73.3848	53.3155	88.4975	64.2952				119.539	85.6036	67.1543	48.0901
	65.8406	392.12		465.801	24.9706		157.823	35.799		142.853	113.77				65.8406	52.4125	392.12	312.147				465.801	381.224	24.9706	20.4366				157.823	114.662	35.799	26.0087				142.853	102.299	113.77	81.4719
	118.912	211.439		212.38	146.953		207.569	213.794		75.4264	213.066				118.912	94.6598	211.439	168.316				212.38	173.817	146.953	120.271				207.569	150.803	213.794	155.326				75.4264	54.0139	213.066	152.579
	67.5269	226.48		156.51	66.3553		119.468	109.811		791.5	153.368				67.5269	53.7549	226.48	180.29				156.51	128.092	66.3553	54.307				119.468	86.7959	109.811	79.78				791.5	566.804	153.368	109.829
	73.7696	111.882		156.054	221.095		50.3137	72.4264		234.421	81.5269				73.7696	58.7244	111.882	89.064				156.054	127.719	221.095	180.951				50.3137	36.5539	72.4264	52.6192				234.421	167.872	81.5269	58.3825
	91.598	83.1838		69.0122	603.269		105.184	207.066		37.9706	75.1838				91.598	72.9167	83.1838	66.2186				69.0122	56.4815	603.269	493.732				105.184	76.4181	207.066	150.438				37.9706	27.1913	75.1838	53.8401
	49.0416	182.225		129.853	133.012		180.297	57.2132		255.321	117.983				49.0416	39.0396	182.225	145.061				129.853	106.275	133.012	108.861				180.297	130.989	57.2132	41.5665				255.321	182.839	117.983	84.4891
	76.0122	354.764		133.782	505.387		221.48	693.311		74.7696	314.09				76.0122	60.5096	354.764	282.411				133.782	109.491	505.387	413.623				221.48	160.91	693.311	503.704				74.7696	53.5435	314.09	224.924
	131.527	104.456		66.2843	52.4853		62.4264	156.137		83.1543	26.0711				131.527	104.702	104.456	83.1522				66.2843	54.2489	52.4853	42.9554				62.4264	45.354	156.137	113.437				83.1543	59.5479	26.0711	18.6699
	76.0833	164.167		562.144	453.433		332.321	107.456		229.924	67.5269				76.0833	60.5662	164.167	130.685				562.144	460.074	453.433	371.102				332.321	241.438	107.456	78.0688				229.924	164.652	67.5269	48.3569
	145.498	310.806		86.1838	352.149		188.894	273.404		417.877	305.777				145.498	115.823	310.806	247.418				86.1838	70.5352	352.149	288.209				188.894	137.236	273.404	198.634				417.877	299.247	305.777	218.971
	73.6985	208.61		100.569	122.196		76.1543	177.752		100.326	155.267				73.6985	58.6678	208.61	166.064				100.569	82.308	122.196	100.009				76.1543	55.3276	177.752	129.141				100.326	71.8447	155.267	111.189
	53.6274	235.551		335.078	156.024		83.6985	104.184		132.983	39.3848				53.6274	42.6902	235.551	187.511				335.078	274.237	156.024	127.695				83.6985	60.8086	104.184	75.6916				132.983	95.2308	39.3848	28.204
	89.5685	57.0711		75.0122	69.9411		91.4558	58.2843		127.225	53.6985				89.5685	71.3011	57.0711	45.4315				75.0122	61.392	69.9411	57.2417				91.4558	66.4445	58.2843	42.3447				127.225	91.1078	53.6985	38.4542
	126.853	98.7401		82.9117	114.083		61.3848	50.8701		74.0416	320.25				126.853	100.981	98.7401	78.6022				82.9117	67.8572	114.083	93.3689				61.3848	44.5973	50.8701	36.9581				74.0416	53.0222	320.25	229.335
	84.8701	83.598		243.836	192.066		242.752	213.167		71.1127	232.451				84.8701	67.5609	83.598	66.5483				243.836	199.562	192.066	157.192				242.752	176.364	213.167	154.87				71.1127	50.9248	232.451	166.461
	294.593	167.61		60.9411	26.5563		49.2132	45.2843		108.012	54.0416				294.593	234.511	167.61	133.426				60.9411	49.8759	26.5563	21.7344				49.2132	35.7544	45.2843	32.9				108.012	77.349	54.0416	38.6999
	70.2843	158.125		132.498	53.5269		24.6569	61.3848		366.208	61.9706				70.2843	55.9499	158.125	125.876				132.498	108.44	53.5269	43.8079				24.6569	17.9137	61.3848	44.5973				366.208	262.247	61.9706	44.378
	77.4264	203.794		79.7401	87.4975		191.794	35.799		86.2843	167.51				77.4264	61.6354	203.794	162.23				79.7401	65.2615	87.4975	71.6104				191.794	139.342	35.799	26.0087				86.2843	61.7894	167.51	119.956
	136.498	103.983		105.426	217.238		268.392	145.196		135.154	93.0122				136.498	108.659	103.983	82.7756				105.426	86.2839	217.238	177.793				268.392	194.992	145.196	105.488				135.154	96.7858	93.0122	66.6073
	99.9117	38.1421		20.5563	139.397		220.965	460.291		19.0711	70.3553				99.9117	79.5348	38.1421	30.3631				20.5563	16.8238	139.397	114.086				220.965	160.536	460.291	334.411				19.0711	13.6571	70.3553	50.3824
	64.6985	222.409		60.3137	244.196		146.74	350.635		143.953	43.2843				64.6985	51.5033	222.409	177.049				60.3137	49.3624	244.196	199.857				146.74	106.61	350.635	254.743				143.953	103.087	43.2843	30.9965
	143.87	186.024		91.0416	173.054		292.12	52.2843		145.953	45.3848				143.87	114.528	186.024	148.085				91.0416	74.5109	173.054	141.632				292.12	212.231	52.2843	37.9856				145.953	104.519	45.3848	32.5007
	112.255	217.238		298.936	395.433		143.095	98.0538		53.5563	221.208				112.255	89.3606	217.238	172.932				298.936	244.658	395.433	323.634				143.095	103.962	98.0538	71.2381				53.5563	38.3524	221.208	158.41
	48.8701	240.782		89.8701	254.764		146.125	116.498		236.439	203.995				48.8701	38.9031	240.782	191.675				89.8701	73.5522	254.764	208.506				146.125	106.163	116.498	84.6378				236.439	169.317	203.995	146.083
	58.0416	317.35		162.439	99.4975		103.77	140.941		124.782	227.451				58.0416	46.2041	317.35	252.627				162.439	132.944	99.4975	81.4315				103.77	75.3907	140.941	102.397				124.782	89.3579	227.451	162.881
	34.1421	245.409		201.924	134.51		61.4558	144.054		164.581	110.326				34.1421	27.1789	245.409	195.358				201.924	165.26	134.51	110.086				61.4558	44.6489	144.054	104.658				164.581	117.858	110.326	79.0059
	230.936	328.291		62.3553	193.61		200.581	168.983		226.439	239.095				230.936	183.837	328.291	261.337				62.3553	51.0333	193.61	158.456				200.581	145.726	168.983	122.769				226.439	162.156	239.095	171.22
	519.659	104.912		112.296	323.279		45.8995	105.569		125.196	160.924				519.659	413.675	104.912	83.5151				112.296	91.9065	323.279	264.581				45.8995	33.3469	105.569	76.6976				125.196	89.6545	160.924	115.24
	17.1421	358.25		30.8995	75.1838		174.894	50.1127		83.3259	41.6274				17.1421	13.646	358.25	285.185				30.8995	25.289	75.1838	61.5325				174.894	127.064	50.1127	36.4079				83.3259	59.6708	41.6274	29.8099
	50.3848	238.48		16.4142	119.711		472.09	90.3553		89.3848	131.196				50.3848	40.1089	238.48	189.842				16.4142	13.4338	119.711	97.9745				472.09	342.983	90.3553	65.6449				89.3848	64.0097	131.196	93.9512
	133.083	182.61		77.7696	319.421		45.6274	191.368		194.48	135.267				133.083	105.941	182.61	145.367				77.7696	63.6488	319.421	261.423				45.6274	33.1492	191.368	139.032				194.48	139.27	135.267	96.8665
	122.468	188.338		157.225	336.605		279.321	140.154		112.426	80.4975				122.468	97.4908	188.338	149.927				157.225	128.678	336.605	275.487				279.321	202.932	140.154	101.825				112.426	80.5101	80.4975	57.6453
	69.2843	65.3553		59.799	112.355		189.338	103.184		60.8406	69.1838				69.2843	55.1538	65.3553	52.0262				59.799	48.9411	112.355	91.9547				189.338	137.558	103.184	74.9651				60.8406	43.5688	69.1838	49.5435
	124.083	307.563		69.7696	98.669		167.983	119.752		85.2548	94.6396				124.083	98.7767	307.563	244.836				69.7696	57.1014	98.669	80.7534				167.983	122.043	119.752	87.0024				85.2548	61.0521	94.6396	67.7727
	66.2843	95.3553		36.1421	129.64		134.941	192.581		179.024	123.569				66.2843	52.7657	95.3553	75.9077				36.1421	29.5797	129.64	106.101				134.941	98.0374	192.581	139.914				179.024	128.202	123.569	88.4891
	406.747	365.877		64.598	37.6274		198.095	250.037		100.698	135.882				406.747	323.792	365.877	291.257				64.598	52.8688	37.6274	30.7953				198.095	143.92	250.037	181.657				100.698	72.1116	135.882	97.3071
	125.882	70.2132		85.0122	191.108		117.054	209.338		352.161	96.9828				125.882	100.209	70.2132	55.8933				85.0122	69.5763	191.108	156.408				117.054	85.0419	209.338	152.088				352.161	252.188	96.9828	69.4507
	77.6274	98.6396		87.8701	184.184		235.25	88.3259		310.463	62.0416				77.6274	61.7954	98.6396	78.5222				87.8701	71.9153	184.184	150.741				235.25	170.914	88.3259	64.1705				310.463	222.327	62.0416	44.4288
	32.5563	175.297		197.38	135.125		181.652	94.7696		97.2548	58.6274				32.5563	25.9165	175.297	139.545				197.38	161.541	135.125	110.59				181.652	131.974	94.7696	68.852				97.2548	69.6455	58.6274	41.9839
	94.669	232.936		29.3848	589.257		145.196	172.267		40.0416	93.598				94.669	75.3614	232.936	185.429				29.3848	24.0493	589.257	482.264				145.196	105.488	172.267	125.155				40.0416	28.6743	93.598	67.0268
	81.9828	45.8701		44.4558	145.297		114.498	225.622		76.4975	162.196				81.9828	65.2625	45.8701	36.5149				44.4558	36.3838	145.297	118.915				114.498	83.1847	225.622	163.919				76.4975	54.7809	162.196	116.151
	162.468	218.551		88.598	130.397		55.3137	194.368		105.439	60.7696				162.468	129.333	218.551	173.978				88.598	72.511	130.397	106.72				55.3137	40.1865	194.368	141.212				105.439	75.506	60.7696	43.5179
	71.8406	194.681		170.137	208.297		84.598	151.581		96.1543	109.941				71.8406	57.1888	194.681	154.976				170.137	139.245	208.297	170.476				84.598	61.4621	151.581	110.126				96.1543	68.8574	109.941	78.7303
	75.7401	324.706		47.4558	148.953		112.326	258.836		234.095	418.664				75.7401	60.293	324.706	258.482				47.4558	38.8391	148.953	121.907				112.326	81.607	258.836	188.049				234.095	167.639	418.664	299.811
	108.355	229.409		23.7279	71.2132		77.0833	67.2548		97.0833	41.2132				108.355	86.2564	229.409	182.621				23.7279	19.4196	71.2132	58.2828				77.0833	56.0026	67.2548	48.862				97.0833	69.5227	41.2132	29.5133
	85.2254	223.137		27.6569	145.698		101.397	58.0416		91.6274	185.64				85.2254	67.8438	223.137	177.629				27.6569	22.6352	145.698	119.244				101.397	73.667	58.0416	42.1684				91.6274	65.6156	185.64	132.939
	46.5269	165.095		46.9411	316.647		112.64	154.095		75.4975	40.3848				46.5269	37.0378	165.095	131.424				46.9411	38.4179	316.647	259.152				112.64	81.8349	154.095	111.953				75.4975	54.0648	40.3848	28.9201
	199.196	190.782		161.196	134.498		233.037	202.681		84.8701	121.882				199.196	158.57	190.782	151.872				161.196	131.927	134.498	110.076				233.037	169.306	202.681	147.252				84.8701	60.7766	121.882	87.2816
	258.25	238.238		65.669	72.4264		43.5563	34.5563		136.468	132.912				258.25	205.58	238.238	189.649				65.669	53.7453	72.4264	59.2758				43.5563	31.6445	34.5563	25.1058				136.468	97.7266	132.912	95.1799
	141.054	209.711		59.9411	253.924		256.279	229.238		56.6985	169.024				141.054	112.286	209.711	166.94				59.9411	49.0574	253.924	207.818				256.279	186.192	229.238	166.546				56.6985	40.6026	169.024	121.041
	135.012	202.61		201.196	190.38		62.7279	303.924		75.1838	144.882				135.012	107.477	202.61	161.288				201.196	164.664	190.38	155.812				62.7279	45.5731	303.924	220.807				75.1838	53.8401	144.882	103.752
	154.238	373.191		76.0122	315.907		149.51	164.037		299.865	196.51				154.238	122.781	373.191	297.079				76.0122	62.2105	315.907	258.547				149.51	108.622	164.037	119.176				299.865	214.737	196.51	140.723
	98.598	219.823		43.2132	168.024		111.64	39.2132		387.764	221.208				98.598	78.4891	219.823	174.991				43.2132	35.3669	168.024	137.516				111.64	81.1084	39.2132	28.4892				387.764	277.683	221.208	158.41
	35.4853	114.77		86.9411	341.877		27.8995	95.669		170.368	68.9411				35.4853	28.2481	114.77	91.3625				86.9411	71.155	341.877	279.802				27.8995	20.2695	95.669	69.5054				170.368	122.002	68.9411	49.3697
	29.799	161.995		38.8995	39.1127		287.806	47.2843		61.0122	46.5563				29.799	23.7215	161.995	128.956				38.8995	31.8364	39.1127	32.0109				287.806	209.097	47.2843	34.353				61.0122	43.6917	46.5563	33.3396
	97.598	306.037		114.498	226.652		106.426	148.397		220.522	49.8701				97.598	77.693	306.037	243.621				114.498	93.7079	226.652	185.498				106.426	77.3209	148.397	107.813				220.522	157.919	49.8701	35.7127
	129.196	64.7696		137.581	151.338		60.3848	152.468		149.782	124.598				129.196	102.847	64.7696	51.5599				137.581	112.6	151.338	123.859				60.3848	43.8708	152.468	110.771				149.782	107.261	124.598	89.2263
	23.4853	123.054		118.983	233.024		158.054	51.799		164.409	41.2132				23.4853	18.6955	123.054	97.9571				118.983	97.3788	233.024	190.714				158.054	114.829	51.799	37.633				164.409	117.736	41.2132	29.5133
	87.4264	41.5269		87.6274	52.5563		31.9706	112.498		162.882	152.953				87.4264	69.5959	41.5269	33.0575				87.6274	71.7167	52.5563	43.0135				31.9706	23.2273	112.498	81.7317				162.882	116.642	152.953	109.532
	20.6569	172.782		26.0711	111.539		272.38	48.6985		160.924	194.196				20.6569	16.4439	172.782	137.543				26.0711	21.3373	111.539	91.2867				272.38	197.889	48.6985	35.3804				160.924	115.24	194.196	139.066
	55.598	94.2132		67.4558	82.598		58.799	120.083		86.6396	209.51				55.598	44.2589	94.2132	74.9985				67.4558	55.2077	82.598	67.6005				58.799	42.7187	120.083	87.2429				86.6396	62.0438	209.51	150.033
	104.912	138.024		23.2426	162.439		159.267	226.078		421.132	138.054				104.912	83.5151	138.024	109.874				23.2426	19.0224	162.439	132.944				159.267	115.711	226.078	164.25				421.132	301.578	138.054	98.8622
	301.149	221.936		168.598	101.841		198.51	130.882		88.2254	131.397				301.149	239.73	221.936	176.672				168.598	137.985	101.841	83.3491				198.51	144.221	130.882	95.0886				88.2254	63.1794	131.397	94.0952
	187.652	65.9411		94.9411	451.215		161.882	288.563		121.681	78.6985				187.652	149.38	65.9411	52.4925				94.9411	77.7024	451.215	369.287				161.882	117.611	288.563	209.647				121.681	87.1375	78.6985	56.3571
	53.2843	209.823		207.066	324.149		240.238	180.066		84.4264	998.536				53.2843	42.417	209.823	167.03				207.066	169.468	324.149	265.293				240.238	174.537	180.066	130.822				84.4264	60.4589	998.536	715.065
	87.598	274.936		586.304	294.108		91.0122	28.799		93.1838	116.355				87.598	69.7325	274.936	218.863				586.304	479.847	294.108	240.706				91.0122	66.1222	28.799	20.9231				93.1838	66.7302	116.355	83.3236
	78.5269	277.48		574.156	129.983		51.2843	153.51		47.7279	166.083				78.5269	62.5114	277.48	220.888				574.156	469.905	129.983	106.381				51.2843	37.2591	153.51	111.528				47.7279	34.1786	166.083	118.934
	87.5685	566.245		43.0416	36.4853		51.1127	77.4558		67.5269	72.6985				87.5685	69.709	566.245	450.76				43.0416	35.2264	36.4853	29.8606				51.1127	37.1344	77.4558	56.2732				67.5269	48.3569	72.6985	52.0604
	71.9411	160.297		50.0416	245.451		208.024	145.61		95.397	105.154				71.9411	57.2688	160.297	127.604				50.0416	40.9554	245.451	200.884				208.024	151.134	145.61	105.789				95.397	68.3151	105.154	75.3024
	174.61	70.4975		31.4853	76.0122		78.5269	31.8995		234.51	127.983				174.61	138.999	70.4975	56.1196				31.4853	25.7684	76.0122	62.2105				78.5269	57.0514	31.8995	23.1756				234.51	167.936	127.983	91.6502
	131.752	241.024		60.0122	154.125		95.7401	60.3137		152.811	176.409				131.752	104.882	241.024	191.868				60.0122	49.1156	154.125	126.14				95.7401	69.5571	60.3137	43.8191				152.811	109.43	176.409	126.329
	81.3848	161.054		43.6274	180.823		252.735	99.8406		73.0416	80.4558				81.3848	64.7865	161.054	128.207				43.6274	35.7059	180.823	147.991				252.735	183.617	99.8406	72.5362				73.0416	52.3061	80.4558	57.6155
	88.9411	176.61		41.3137	112.983		104.225	128.012		92.598	61.1127				88.9411	70.8017	176.61	140.591				41.3137	33.8123	112.983	92.4682				104.225	75.7218	128.012	93.0034				92.598	66.3107	61.1127	43.7636
	129.983	209.965		138.941	246.652		66.1838	99.7401		171.853	183.882				129.983	103.473	209.965	167.143				138.941	113.713	246.652	201.867				66.1838	48.0839	99.7401	72.4632				171.853	123.066	183.882	131.681
	236.551	741.566		48.1421	337.764		360.919	32.5563		79.7279	88.1838				236.551	188.307	741.566	590.324				48.1421	39.4008	337.764	276.436				360.919	262.215	32.5563	23.6528				79.7279	57.0942	88.1838	63.1496
	32.9706	356.049		238.108	44.8701		97.5685	31.7279		635.269	32.3848				32.9706	26.2463	356.049	283.433				238.108	194.874	44.8701	36.7229				97.5685	70.8855	31.7279	23.051				635.269	454.925	32.3848	23.1912
	47.0416	143.61		55.1838	109.74		126.225	200.652		165.853	264.995				47.0416	37.4475	143.61	114.321				55.1838	45.1639	109.74	89.8143				126.225	91.7053	200.652	145.778				165.853	118.769	264.995	189.766
	111.054	196.225		133.953	28.4853		187.811	277.279		116.711	107.74				111.054	88.4045	196.225	156.205				133.953	109.631	28.4853	23.3132				187.811	136.449	277.279	201.449				116.711	83.5781	107.74	77.1541
	444.304	198.125		150.426	190.681		283.492	173.095		70.8701	659.955				444.304	353.688	198.125	157.718				150.426	123.113	190.681	156.059				283.492	205.963	173.095	125.757				70.8701	50.751	659.955	472.603
	150.468	112.355		79.8406	184.693		106.74	108.912		284.421	141.225				150.468	119.78	112.355	89.4406				79.8406	65.3437	184.693	151.158				106.74	77.5488	108.912	79.1265				284.421	203.678	141.225	101.133
	96.0122	141.397		146.225	142.125		236.137	48.8995		104.397	113.326				96.0122	76.4306	141.397	112.559				146.225	119.675	142.125	116.319				236.137	171.558	48.8995	35.5265				104.397	74.7601	113.326	81.1542
	109.326	239.836		343.279	53.7696		61.4558	82.598		49.2843	122.426				109.326	87.029	239.836	190.921				343.279	280.949	53.7696	44.0065				61.4558	44.6489	82.598	60.0091				49.2843	35.2932	122.426	87.6712
	54.0416	76.669		325.693	175.61		54.6274	138.196		69.4264	121.184				54.0416	43.0199	76.669	61.0324				325.693	266.556	175.61	143.724				54.6274	39.6879	138.196	100.402				69.4264	49.7172	121.184	86.7814
	52.5269	119.841		90.9117	146.468		101.154	297.907		115.296	10.8284				52.5269	41.8141	119.841	95.3992				90.9117	74.4046	146.468	119.873				101.154	73.4906	297.907	216.435				115.296	82.5654	10.8284	7.75436
	198.539	223.924		113.841	141.882		151.154	112.882		52.4853	240.167				198.539	158.047	223.924	178.255				113.841	93.1703	141.882	116.12				151.154	109.817	112.882	82.0113				52.4853	37.5854	240.167	171.986
	118.255	379.576		63.2132	72.5685		82.6274	282.363		77.669	125.64				118.255	94.1369	379.576	302.162				63.2132	51.7354	72.5685	59.3921				82.6274	60.0305	282.363	205.142				77.669	55.6198	125.64	89.9722
	29.8995	72.1838		43.0711	170.024		116.456	278.463		179.953	25.1421				29.8995	23.8015	72.1838	57.462				43.0711	35.2506	170.024	139.153				116.456	84.6075	278.463	202.309				179.953	128.867	25.1421	18.0046
	49.6985	296.936		43.799	23.0711		91.9706	95.0122		55.6985	259.309				49.6985	39.5625	296.936	236.376				43.799	35.8463	23.0711	18.882				91.9706	66.8185	95.0122	69.0283				55.6985	39.8864	259.309	185.694
	43.8995	261.995		157.882	171.953		85.8701	306.433		113.983	126.882				43.8995	34.9462	261.995	208.561				157.882	129.215	171.953	140.731				85.8701	62.3863	306.433	222.63				113.983	81.6246	126.882	90.8621
	229.279	180.054		165.811	216.853		98.1543	100.225		136.983	200.024				229.279	182.518	180.054	143.332				165.811	135.704	216.853	177.478				98.1543	71.3111	100.225	72.8158				136.983	98.0952	200.024	143.24
	63.9706	250.564		26.2132	89.3553		46.0416	103.397		19.9706	195.924				63.9706	50.9239	250.564	199.461				26.2132	21.4536	89.3553	73.1308				46.0416	33.4501	103.397	75.12				19.9706	14.3012	195.924	140.304
	85.4975	125.74		107.083	158.024		185.267	171.924		88.0833	114.326				85.4975	68.0604	125.74	100.096				107.083	87.6399	158.024	129.332				185.267	134.6	171.924	124.906				88.0833	63.0776	114.326	81.8703
	96.468	53.0416		55.0416	447.919		106.184	67.9411		32.1421	93.9117				96.468	76.7935	53.0416	42.2238				55.0416	45.0476	447.919	366.589				106.184	77.1447	67.9411	49.3606				32.1421	23.0174	93.9117	67.2514
	120.326	344.99		25.1421	130.095		21.9706	30.2132		75.799	44.2132				120.326	95.7856	344.99	274.63				25.1421	20.577	130.095	106.474				21.9706	15.9621	30.2132	21.9505				75.799	54.2807	44.2132	31.6617
	82.8701	42.2132		150.368	78.2548		49.3848	128.569		30.7279	85.0833				82.8701	65.9688	42.2132	33.6039				150.368	123.065	78.2548	64.0459				49.3848	35.879	128.569	93.4076				30.7279	22.0047	85.0833	60.9293
	40.3848	90.669		42.1421	140.012		146.196	162.711		148.983	82.2548				40.3848	32.1484	90.669	72.1772				42.1421	34.4903	140.012	114.59				146.196	106.214	162.711	118.213				148.983	106.689	82.2548	58.9038
	185.752	106.083		190.61	174.439		265.35	212.794		194.51	320.823				185.752	147.868	106.083	84.4477				190.61	156.001	174.439	142.765				265.35	192.782	212.794	154.599				194.51	139.291	320.823	229.746
	77.0416	41.799		51.1127	201.723		36.4558	145.154		98.7401	22.3137				77.0416	61.3291	41.799	33.2741				51.1127	41.832	201.723	165.096				36.4558	26.4859	145.154	105.458				98.7401	70.7091	22.3137	15.9791
	110.941	209.125		60.4558	223.64		75.9828	133.912		302.907	46.2132				110.941	88.3148	209.125	166.474				60.4558	49.4787	223.64	183.033				75.9828	55.203	133.912	97.2895				302.907	216.916	46.2132	33.0939
	330.338	261.764		81.2132	68.0833		29.3137	342.392		133.953	125.627				330.338	262.966	261.764	208.378				81.2132	66.4671	68.0833	55.7212				29.3137	21.297	342.392	248.755				133.953	95.9258	125.627	89.9635
	385.463	214.995		119.024	159.995		225.066	357.966		115.953	80.3259				385.463	306.848	214.995	171.147				119.024	97.4128	159.995	130.944				225.066	163.515	357.966	260.069				115.953	83.0357	80.3259	57.5225
	29.4853	282.108		100.054	60.8995		62.4558	80.5685		98.3553	102.012				29.4853	23.4718	282.108	224.572				100.054	81.8868	60.8995	49.8418				62.4558	45.3754	80.5685	58.5346				98.3553	70.4336	102.012	73.0523
	43.7279	158.439		131.368	409.073		150.125	190.551		55.5269	88.4264				43.7279	34.8096	158.439	126.125				131.368	107.515	409.073	334.797				150.125	109.069	190.551	138.439				55.5269	39.7636	88.4264	63.3233
	71.1127	114.539		81.7696	212.007		81.7696	97.0538		82.598	25.3137				71.1127	56.6093	114.539	91.179				81.7696	66.9225	212.007	173.512				81.7696	59.4073	97.0538	70.5115				82.598	59.1495	25.3137	18.1275
	69.2843	207.953		85.4264	263.037		121.196	112.326		161.066	100.811				69.2843	55.1538	207.953	165.541				85.4264	69.9153	263.037	215.276				121.196	88.0513	112.326	81.607				161.066	115.342	100.811	72.1923
	80.4558	169.782		102.941	421.789		547.943	138.581		69.4558	180.539				80.4558	64.0469	169.782	135.155				102.941	84.2498	421.789	345.204				547.943	398.092	138.581	100.682				69.4558	49.7382	180.539	129.286
	29.3137	356.179		127.74	194.882		156.38	30.3137		35.6274	187.995				29.3137	23.3352	356.179	283.536				127.74	104.546	194.882	159.497				156.38	113.613	30.3137	22.0235				35.6274	25.5133	187.995	134.626
	30.8995	229.681		32.1421	278.563		296.693	119.267		99.0122	148.569				30.8995	24.5976	229.681	182.838				32.1421	26.306	278.563	227.984				296.693	215.554	119.267	86.6499				99.0122	70.904	148.569	106.392
	234.066	445.161		57.3553	231.894		110.012	149.598		60.9411	93.5269				234.066	186.329	445.161	354.371				57.3553	46.9412	231.894	189.789				110.012	79.9261	149.598	108.686				60.9411	43.6407	93.5269	66.9759
	103.882	278.894		118.468	66.6274		160.012	133.154		163.267	458.132				103.882	82.6956	278.894	222.014				118.468	96.9575	66.6274	54.5297				160.012	116.252	133.154	96.7393				163.267	116.918	458.132	328.075
	99.0122	108.355		92.1838	354.505		55.0416	62.1127		40.6274	95.4264				99.0122	78.8188	108.355	86.2564				92.1838	75.4458	354.505	290.136				55.0416	39.9888	62.1127	45.1261				40.6274	29.0938	95.4264	68.3361
	124.439	243.539		51.0416	170.095		155.681	78.8406		81.6396	169.439				124.439	99.0595	243.539	193.87				51.0416	41.7738	170.095	139.211				155.681	113.106	78.8406	57.2793				81.6396	58.4632	169.439	121.337
	147.811	448.421		102.64	141.184		181.38	230.309		61.799	86.4264				147.811	117.665	448.421	356.966				102.64	84.0031	141.184	115.549				181.38	131.776	230.309	167.324				61.799	44.2551	86.4264	61.8911
	362.676	49.9706		189.095	150.581		135.539	128.326		47.6274	129.154				362.676	288.709	49.9706	39.7792				189.095	154.761	150.581	123.239				135.539	98.4719	128.326	93.2313				47.6274	34.1066	129.154	92.4891
	176.652	197.61		25.3137	161.569		152.238	108.811		64.4558	69.0416				176.652	140.624	197.61	157.308				25.3137	20.7174	161.569	132.232				152.238	110.604	108.811	79.0535				64.4558	46.1577	69.0416	49.4416
	302.563	147.368		297.593	35.799		61.1127	174.095		55.6274	107.811				302.563	240.856	147.368	117.312				297.593	243.558	35.799	29.2989				61.1127	44.3996	174.095	126.484				55.6274	39.8355	107.811	77.2051
	106.184	202.066		185.622	108.498		125.983	152.995		55.2843	152.782				106.184	84.5277	202.066	160.855				185.622	151.918	108.498	88.7973				125.983	91.529	152.995	111.154				55.2843	39.5898	152.782	109.409
	176.255	65.799		20.3137	147.853		43.0416	144.012		153.752	126.498				176.255	140.308	65.799	52.3794				20.3137	16.6253	147.853	121.007				43.0416	31.2706	144.012	104.628				153.752	110.104	126.498	90.5866
	145.841	233.693		47.2843	470.002		77.2132	212.409		85.9117	256.066				145.841	116.097	233.693	186.032				47.2843	38.6988	470.002	384.663				77.2132	56.0969	212.409	154.32				85.9117	61.5225	256.066	183.372
	137.539	57.1127		59.3848	254.723		191.225	272.463		89.2843	151.953				137.539	109.488	57.1127	45.4646				59.3848	48.6022	254.723	208.472				191.225	138.929	272.463	197.95				89.2843	63.9377	151.953	108.816
	160.853	127.397		56.8701	131.924		191.326	277.409		78.7696	142.297				160.853	128.047	127.397	101.415				56.8701	46.5441	131.924	107.97				191.326	139.002	277.409	201.543				78.7696	56.408	142.297	101.9
	90.7107	55.5563		217.297	272.877		352.451	146.823		200.823	47.799				90.7107	72.2104	55.5563	44.2257				217.297	177.841	272.877	223.33				352.451	256.063	146.823	106.67				200.823	143.812	47.799	34.2295
	102.468	241.723		165.64	241.167		220.652	293.966		140.355	66.8995				102.468	81.5698	241.723	192.424				165.64	135.564	241.167	197.377				220.652	160.308	293.966	213.572				140.355	100.51	66.8995	47.9076
	29.6274	218.38		48.3137	273.534		190.024	122.882		327.593	293.179				29.6274	23.5849	218.38	173.841				48.3137	39.5413	273.534	223.868				190.024	138.057	122.882	89.2765				327.593	234.594	293.179	209.949
	65.8701	54.2843		46.8701	223.196		288.049	42.6985		82.6396	148.297				65.8701	52.436	54.2843	43.2131				46.8701	38.3598	223.196	182.67				288.049	209.273	42.6985	31.0213				82.6396	59.1793	148.297	106.197
	29.1421	203.652		60.7696	592.997		122.669	550.073		78.0416	97.4975				29.1421	23.1986	203.652	162.117				60.7696	49.7355	592.997	485.325				122.669	89.1215	550.073	399.639				78.0416	55.8866	97.4975	69.8193
	25.9706	30.9706		99.1838	197.995		191.037	80.2548		377.191	225.179				25.9706	20.6739	30.9706	24.6542				99.1838	81.1747	197.995	162.044				191.037	138.792	80.2548	58.3067				377.191	270.111	225.179	161.254
	104.326	109.456		61.6985	320.723		103.125	61.669		48.0416	33.0416				104.326	83.0488	109.456	87.1324				61.6985	50.4957	320.723	262.488				103.125	74.9223	61.669	44.8038				48.0416	34.4032	33.0416	23.6615
	35.9706	140.74		102.326	430.576		127.983	132.953		104.225	87.3553				35.9706	28.6344	140.74	112.036				102.326	83.7463	430.576	352.395				127.983	92.9821	132.953	96.5932				104.225	74.6372	87.3553	62.5563
	18.7279	247.338		55.3848	61.4264		34.4142	92.1838		97.1127	208.894				18.7279	14.9084	247.338	196.894				55.3848	45.3284	61.4264	50.2731				34.4142	25.0026	92.1838	66.9734				97.1127	69.5437	208.894	149.592
	160.995	35.5563		161.61	74.8701		91.9117	126.983		487.144	96.9828				160.995	128.16	35.5563	28.3046				161.61	132.266	74.8701	61.2757				91.9117	66.7757	126.983	92.2556				487.144	348.851	96.9828	69.4507
	143.024	130.439		88.3553	85.0538		200.108	30.1421		92.669	212.865				143.024	113.855	130.439	103.836				88.3553	72.3124	85.0538	69.6104				200.108	145.382	30.1421	21.8988				92.669	66.3615	212.865	152.435
	92.8112	169.61		139.598	148.882		141.154	149.51		113.983	157.095				92.8112	73.8825	169.61	135.018				139.598	114.251	148.882	121.849				141.154	102.551	149.51	108.622				113.983	81.6246	157.095	112.498
	96.7401	150.196		197.782	112.811		97.0538	76.2548		297.551	26.7279				96.7401	77.0101	150.196	119.564				197.782	161.87	112.811	92.3278				97.0538	70.5115	76.2548	55.4006				297.551	213.08	26.7279	19.1402
	180.095	32.799		98.8406	109.912		13.2426	118.154		187.037	51.0416				180.095	143.365	32.799	26.1097				98.8406	80.8939	109.912	89.9548				13.2426	9.62101	118.154	85.8415				187.037	133.939	51.0416	36.5516
	101.255	36.8995		88.0416	250.664		119.853	120.054		111.225	398.304				101.255	80.604	36.8995	29.3739				88.0416	72.0557	250.664	205.15				119.853	87.0755	120.054	87.2215				111.225	79.65	398.304	285.231
	87.4264	253.108		225.095	54.598		54.3848	69.2548		94.669	94.6985				87.4264	69.5959	253.108	201.487				225.095	184.224	54.598	44.6845				54.3848	39.5116	69.2548	50.315				94.669	67.7937	94.6985	67.8149
	86.4975	143.125		515.914	160.711		45.1127	137.397		91.598	229.823				86.4975	68.8564	143.125	113.935				515.914	422.238	160.711	131.53				45.1127	32.7753	137.397	99.8217				91.598	65.5946	229.823	164.58
	189.024	178.652		326.262	353.433		39.3848	57.5269		48.2843	128.225				189.024	150.473	178.652	142.216				326.262	267.022	353.433	289.26				39.3848	28.6138	57.5269	41.7944				48.2843	34.577	128.225	91.8239
	56.7696	198.066		147.083	43.3137		180.711	86.598		79.8406	102.598				56.7696	45.1915	198.066	157.671				147.083	120.377	43.3137	35.4491				180.711	131.29	86.598	62.9152				79.8406	57.1749	102.598	73.4718
	146.154	164.953		54.9411	101.426		94.1543	128.841		174.652	288.907				146.154	116.346	164.953	131.311				54.9411	44.9653	101.426	83.0101				94.1543	68.405	128.841	93.6053				174.652	125.071	288.907	206.89
	341.706	199.095		122.77	30.3137		105.669	50.799		270.877	298.35				341.706	272.015	199.095	158.49				122.77	100.478	30.3137	24.8096				105.669	76.7706	50.799	36.9065				270.877	193.979	298.35	213.653
	42.6274	151.983		219.723	216.882		177.924	57.8701		35.3848	140.083				42.6274	33.9336	151.983	120.986				219.723	179.827	216.882	177.502				177.924	129.265	57.8701	42.0438				35.3848	25.3395	140.083	100.316
	122.841	271.794		117.87	614.867		274.363	108.284		73.8406	201.267				122.841	97.7874	271.794	216.362				117.87	96.4681	614.867	503.224				274.363	199.33	108.284	78.6707				73.8406	52.8782	201.267	144.13
	164.681	233.095		87.8701	158.894		114.225	208.48		121.113	57.3553				164.681	131.095	233.095	185.556				87.8701	71.9153	158.894	130.044				114.225	82.987	208.48	151.465				121.113	86.7304	57.3553	41.0729
	59.7696	154.255		275.096	154.669		107.811	121.154		451.291	129.024				59.7696	47.5797	154.255	122.795				275.096	225.146	154.669	126.585				107.811	78.327	121.154	88.021				451.291	323.176	129.024	92.3961
	33.4558	263.238		57.799	274.723		74.5269	732.896		560.203	140.225				33.4558	26.6325	263.238	209.551				57.799	47.3043	274.723	224.841				74.5269	54.1453	732.896	532.464				560.203	401.169	140.225	100.417
	211.48	264.279		170.853	318.238		277.25	94.0122		110.468	114.296				211.48	168.349	264.279	210.38				170.853	139.831	318.238	260.454				277.25	201.428	94.0122	68.3017				110.468	79.1076	114.296	81.8493
	92.0833	204.095		103.154	203.752		174.137	137.083		134.409	103.397				92.0833	73.303	204.095	162.47				103.154	84.4243	203.752	166.756				174.137	126.514	137.083	99.5938				134.409	96.2522	103.397	74.044
	375.191	31.5563		126.426	315.505		162.238	79.0416		277.439	53.1127				375.191	298.671	31.5563	25.1204				126.426	103.471	315.505	258.218				162.238	117.869	79.0416	57.4253				277.439	198.678	53.1127	38.0347
	35.3137	58.6985		354.647	56.5563		51.0416	35.3137		84.5269	152.297				35.3137	28.1115	58.6985	46.727				354.647	290.253	56.5563	46.2872				51.0416	37.0827	35.3137	25.6561				84.5269	60.5309	152.297	109.062
	100.142	95.598		72.2548	69.0416		115.74	90.4975		247.38	145.125				100.142	79.7182	95.598	76.1009				72.2548	59.1353	69.0416	56.5055				115.74	84.0875	90.4975	65.7482				247.38	177.152	145.125	103.926
	172.882	36.7279		112.012	144.811		472.688	122.953		104.598	269.794				172.882	137.623	36.7279	29.2373				112.012	91.6739	144.811	118.517				472.688	343.418	122.953	89.328				104.598	74.904	269.794	193.203
	48.3848	194.652		76.2548	141.853		99.669	100.125		91.5269	196.154				48.3848	38.5168	194.652	154.953				76.2548	62.409	141.853	116.096				99.669	72.4115	100.125	72.7427				91.5269	65.5436	196.154	140.469
	313.279	155.853		17.8995	36.799		182.941	139.811		159.196	178.238				313.279	249.386	155.853	124.067				17.8995	14.6494	36.799	30.1173				182.941	132.91	139.811	101.576				159.196	114.002	178.238	127.638
	399.404	137.669		115.498	197.167		92.7696	105.012		75.3259	125.397				399.404	317.946	137.669	109.592				115.498	94.5263	197.167	161.366				92.7696	67.399	105.012	76.2935				75.3259	53.9419	125.397	89.7985
	120.64	173.468		63.1838	142.368		156.368	70.3553		439.747	102.054				120.64	96.0353	173.468	138.089				63.1838	51.7114	142.368	116.517				156.368	113.604	70.3553	51.1145				439.747	314.909	102.054	73.0821
	126.64	103.598		58.2132	56.8406		49.2843	369.333		38.0711	127.397				126.64	100.812	103.598	82.4693				58.2132	47.6433	56.8406	46.5199				49.2843	35.806	369.333	268.328				38.0711	27.2632	127.397	91.2307
	171.368	136.125		74.1127	195.338		208.439	58.1838		58.2843	56.8701				171.368	136.417	136.125	108.362				74.1127	60.6559	195.338	159.87				208.439	151.435	58.1838	42.2717				58.2843	41.7382	56.8701	40.7254
	148.811	146.711		86.7401	132.539		87.8112	259.551		144.924	69.0122				148.811	118.461	146.711	116.789				86.7401	70.9905	132.539	108.474				87.8112	63.7966	259.551	188.569				144.924	103.782	69.0122	49.4206
	107.941	41.2132		75.5685	160.823		91.2548	169.267		84.1838	182.61				107.941	85.9266	41.2132	32.8078				75.5685	61.8473	160.823	131.622				91.2548	66.2984	169.267	122.976				84.1838	60.2852	182.61	130.77
	217.764	242.338		271.007	141.569		217.451	84.4853		406.86	152.681				217.764	173.352	242.338	192.914				271.007	221.8	141.569	115.864				217.451	157.982	84.4853	61.3803				406.86	291.358	152.681	109.337
	406.233	70.8701		174.581	55.1421		83.9411	214.238		58.3553	111.498				406.233	323.382	70.8701	56.4162				174.581	142.882	55.1421	45.1298				83.9411	60.9849	214.238	155.648				58.3553	41.789	111.498	79.8449
	46.2843	141.338		89.669	460.919		124.811	206.38		90.0122	72.5269				46.2843	36.8447	141.338	112.512				89.669	73.3876	460.919	377.229				124.811	90.6778	206.38	149.939				90.0122	64.459	72.5269	51.9375
	121.669	191.338		70.9411	142.882		103.527	98.2254		162.125	63.1127				121.669	96.8547	191.338	152.315				70.9411	58.0601	142.882	116.939				103.527	75.2144	98.2254	71.3627				162.125	116.1	63.1127	45.1959
	105.042	194.61		71.9411	191.853		130.924	178.853		123.498	120.598				105.042	83.6185	194.61	154.92				71.9411	58.8786	191.853	157.018				130.924	95.1188	178.853	129.94				123.498	88.4382	120.598	86.3619
	33.9706	273.764		97.2548	31.799		50.8701	106.498		147.983	65.4558				33.9706	27.0423	273.764	217.931				97.2548	79.596	31.799	26.0252				50.8701	36.9581	106.498	77.3726				147.983	105.972	65.4558	46.8738
	168.238	166.581		45.9706	278.451		89.5269	148.213		190.326	543.754				168.238	133.926	166.581	132.607				45.9706	37.6236	278.451	227.892				89.5269	65.0431	148.213	107.68				190.326	136.295	543.754	389.39
	80.598	112.669		169.439	90.9828		29.9706	179.024		37.4142	617.127				80.598	64.1601	112.669	89.6903				169.439	138.673	90.9828	74.4628				29.9706	21.7742	179.024	130.065				37.4142	26.7928	617.127	441.933
	50.6274	88.7696		81.4975	333.179		223.794	198.782		89.3259	254.593				50.6274	40.302	88.7696	70.6651				81.4975	66.6998	333.179	272.683				223.794	162.591	198.782	144.419				89.3259	63.9675	254.593	182.317
	121.368	242.078		62.9706	97.5391		306.363	217.037		85.669	131.439				121.368	96.6147	242.078	192.707				62.9706	51.5369	97.5391	79.8287				306.363	222.579	217.037	157.681				85.669	61.3487	131.439	94.125
	297.049	232.865		34.4853	117.397		106.598	225.652		57.5563	47.799				297.049	236.466	232.865	185.372				34.4853	28.2237	117.397	96.0809				106.598	77.4456	225.652	163.941				57.5563	41.2168	47.799	34.2295
	63.598	194.238		163.539	181.125		71.3848	255.622		195.924	72.2843				63.598	50.6273	194.238	154.623				163.539	133.845	181.125	148.238				71.3848	51.8625	255.622	185.715				195.924	140.304	72.2843	51.7638
	373.534	44.2843		188.622	125.681		349.948	112.74		213.581	86.598				373.534	297.352	44.2843	35.2526				188.622	154.374	125.681	102.861				349.948	254.244	112.74	81.9079				213.581	152.948	86.598	62.014
	265.439	77.5269		236.338	235.723		238.309	161.196		70.1838	133.74				265.439	211.303	77.5269	61.7154				236.338	193.426	235.723	192.922				238.309	173.136	161.196	117.112				70.1838	50.2596	133.74	95.7731
	166.368	145.468		81.7696	124.255		156.439	186.238		108.598	101.983				166.368	132.437	145.468	115.8				81.7696	66.9225	124.255	101.694				156.439	113.656	186.238	135.305				108.598	77.7685	101.983	73.0313
	51.2132	232.48		65.5269	155.681		49.1421	507.103		48.8701	49.8701				51.2132	40.7683	232.48	185.066				65.5269	53.629	155.681	127.414				49.1421	35.7027	507.103	368.42				48.8701	34.9965	49.8701	35.7127
	228.723	47.3848		114.569	40.3848		265.593	110.728		103.468	71.2132				228.723	182.075	47.3848	37.7207				114.569	93.766	40.3848	33.052				265.593	192.959	110.728	80.446				103.468	74.0948	71.2132	50.9967
	33.4853	57.2132		78.8701	60.0416		120.669	143.941		49.4558	119.368				33.4853	26.656	57.2132	45.5446				78.8701	64.5495	60.0416	49.1397				120.669	87.6684	143.941	104.576				49.4558	35.416	119.368	85.4807
	100.983	66.4264		155.024	265.924		70.1127	213.953		421.818	100.225				100.983	80.3875	66.4264	52.8788				155.024	126.876	265.924	217.639				70.1127	50.9383	213.953	155.441				421.818	302.07	100.225	71.7728
	61.9706	109.882		22.5563	195.853		187.196	104.326		267.125	81.598				61.9706	49.3318	109.882	87.4719				22.5563	18.4607	195.853	160.291				187.196	136.002	104.326	75.7949				267.125	191.292	81.598	58.4334
	38.6274	245.108		107.012	107.468		109.012	49.0416		224.338	280.108				38.6274	30.7494	245.108	195.118				107.012	87.5817	107.468	87.9548				109.012	79.1995	49.0416	35.6297				224.338	160.652	280.108	200.589
	78.4558	287.392		99.2965	45.9706		57.3848	141.64		55.2843	112.74				78.4558	62.4548	287.392	228.779				99.2965	81.267	45.9706	37.6236				57.3848	41.6912	141.64	102.904				55.2843	39.5898	112.74	80.7347
	64.5563	133.326		155.853	209.368		258.894	93.4558		54.3848	59.1127				64.5563	51.3901	133.326	106.134				155.853	127.554	209.368	171.352				258.894	188.092	93.4558	67.8975				54.3848	38.9457	59.1127	42.3314
	130.196	120.64		34.3848	271.522		104.083	100.498		188.681	93.8406				130.196	103.643	120.64	96.0353				34.3848	28.1415	271.522	222.221				104.083	75.6186	100.498	73.0134				188.681	135.117	93.8406	67.2005
	72.3553	95.6985		205.024	148.652		127.296	102.326		99.4264	44.4853				72.3553	57.5985	95.6985	76.1809				205.024	167.798	148.652	121.661				127.296	92.4835	102.326	74.3418				99.4264	71.2006	44.4853	31.8565
	100.811	104.64		59.2548	209.48		64.3553	80.5269		333.007	397.581				100.811	80.2509	104.64	83.2985				59.2548	48.4958	209.48	171.444				64.3553	46.7554	80.5269	58.5044				333.007	238.471	397.581	284.713
	86.0122	142.811		66.6274	358.09		72.2843	58.2843		74.2843	270.563				86.0122	68.4701	142.811	113.685				66.6274	54.5297	358.09	293.071				72.2843	52.516	58.2843	42.3447				74.2843	53.196	270.563	193.754
	110.498	86.1838		124.054	212.551		693.132	99.1838		43.6274	66.6985				110.498	87.9617	86.1838	68.6067				124.054	101.529	212.551	173.958				693.132	503.574	99.1838	72.059				43.6274	31.2422	66.6985	47.7637
	159.723	120.841		125.841	265.38		46.5563	163.054		159.184	97.7696				159.723	127.148	120.841	96.1953				125.841	102.991	265.38	217.194				46.5563	33.8241	163.054	118.462				159.184	113.994	97.7696	70.0141
	80.5269	179.054		176.983	32.0711		87.7696	23.6569		30.9706	59.3553				80.5269	64.1035	179.054	142.536				176.983	144.848	32.0711	26.2479				87.7696	63.7664	23.6569	17.1872				30.9706	22.1785	59.3553	42.5051
	42.0416	255.066		62.669	262.522		76.3848	259.137		19.4853	71.0122				42.0416	33.4673	255.066	203.046				62.669	51.29	262.522	214.855				76.3848	55.4951	259.137	188.268				19.4853	13.9537	71.0122	50.8528
	63.3259	152.196		204.51	212.309		205.125	115.154		124.468	167.297				63.3259	50.4107	152.196	121.156				204.51	167.376	212.309	173.759				205.125	149.027	115.154	83.6619				124.468	89.1332	167.297	119.803
	145.669	165.397		26.9706	387.605		153.225	23.5563		73.0122	81.7696				145.669	115.96	165.397	131.664				26.9706	22.0735	387.605	317.227				153.225	111.321	23.5563	17.1141				73.0122	52.285	81.7696	58.5563
	168.48	102.468		105.539	22.0711		125.882	211.368		537.889	188.024				168.48	134.119	102.468	81.5698				105.539	86.3761	22.0711	18.0636				125.882	91.456	211.368	153.563				537.889	385.19	188.024	134.647
	66.799	44.3553		31.8995	76.0833		65.2132	76.6985		60.799	361.274				66.799	53.1754	44.3553	35.3091				31.8995	26.1074	76.0833	62.2687				65.2132	47.3787	76.6985	55.723				60.799	43.539	361.274	258.713
	49.0416	252.338		58.6274	279.836		240.167	75.1838		59.1127	164.882				49.0416	39.0396	252.338	200.874				58.6274	47.9823	279.836	229.025				240.167	174.486	75.1838	54.6225				59.1127	42.3314	164.882	118.074
	148.083	37.3137		110.154	292.321		65.1421	102.669		33.0416	33.1421				148.083	117.882	37.3137	29.7036				110.154	90.1533	292.321	239.243				65.1421	47.327	102.669	74.5911				33.0416	23.6615	33.1421	23.7335
	64.1838	157.154		76.3553	187.208		457.889	80.598		78.9411	360.865				64.1838	51.0936	157.154	125.103				76.3553	62.4913	187.208	153.216				457.889	332.666	80.598	58.5561				78.9411	56.5308	360.865	258.42
	402.404	179.782		73.8701	627.399		170.64	64.6985		266.38	99.2548				402.404	320.334	179.782	143.115				73.8701	60.4573	627.399	513.481				170.64	123.973	64.6985	47.0048				266.38	190.758	99.2548	71.0777
	144.426	153.953		120.154	181.811		76.4264	150.012		214.924	72.8406				144.426	114.971	153.953	122.555				120.154	98.3376	181.811	148.799				76.4264	55.5253	150.012	108.987				214.924	153.91	72.8406	52.1621
	119.598	145.782		88.2548	141.983		153.711	85.8406		117.355	163.782				119.598	95.2061	145.782	116.05				88.2548	72.2302	141.983	116.203				153.711	111.674	85.8406	62.3649				117.355	84.0397	163.782	117.286
	98.6985	126.711		120.527	78.4558		27.3137	135.024		36.7279	135.154				98.6985	78.5691	126.711	100.868				120.527	98.6425	78.4558	64.2104				27.3137	19.844	135.024	98.0979				36.7279	26.3013	135.154	96.7858
	27.7279	75.7696		100.012	209.421		90.9117	58.1127		69.0416	130.539				27.7279	22.0728	75.7696	60.3165				100.012	81.8527	209.421	171.396				90.9117	66.0492	58.1127	42.22				69.0416	49.4416	130.539	93.4808
	141.368	290.995		116.77	175.823		152.125	206.853		112.811	154.095				141.368	112.536	290.995	231.647				116.77	95.5674	175.823	143.899				152.125	110.522	206.853	150.283				112.811	80.7856	154.095	110.35
	70.8701	73.8406		22.3137	142.054		90.1249	123.811		243.693	32.7279				70.8701	56.4162	73.8406	58.7809				22.3137	18.2621	142.054	116.261				90.1249	65.4775	123.811	89.9513				243.693	174.512	32.7279	23.4369
	114.225	88.669		106.284	206.368		45.2843	165.409		68.3553	83.7696				114.225	90.9293	88.669	70.5851				106.284	86.986	206.368	168.897				45.2843	32.9	165.409	120.173				68.3553	48.9502	83.7696	59.9885
	63.1838	92.8701		87.9117	141.326		61.0416	37.2843		88.1838	94.1127				63.1838	50.2975	92.8701	73.9294				87.9117	71.9493	141.326	115.665				61.0416	44.3479	37.2843	27.0878				88.1838	63.1496	94.1127	67.3954
	42.0416	136.527		52.2843	147.912		32.9706	159.953		98.3259	110.154				42.0416	33.4673	136.527	108.682				52.2843	42.7909	147.912	121.055				32.9706	23.9538	159.953	116.209				98.3259	70.4125	110.154	78.883
	259.48	36.7279		241.965	114.054		321.836	167.468		96.598	154.782				259.48	206.56	36.7279	29.2373				241.965	198.031	114.054	93.3448				321.836	233.82	167.468	121.669				96.598	69.1751	154.782	110.841
	298.078	152.024		47.6985	207.551		64.5269	209.61		93.9117	133.64				298.078	237.285	152.024	121.019				47.6985	39.0378	207.551	169.866				64.5269	46.8801	209.61	152.286				93.9117	67.2514	133.64	95.7011
	137.468	170.083		61.3553	103.083		117.941	423.203		116.941	170.167				137.468	109.432	170.083	135.395				61.3553	50.2149	103.083	84.3662				117.941	85.6866	423.203	307.466				116.941	83.7431	170.167	121.859
	107.397	189.51		80.1838	243.208		48.8995	94.8406		48.8995	53.5563				107.397	85.4935	189.51	150.859				80.1838	65.6246	243.208	199.048				48.8995	35.5265	94.8406	68.9036				48.8995	35.0176	53.5563	38.3524
	92.6985	71.598		47.8701	212.551		110.681	114.255		173.054	273.877				92.6985	73.7927	71.598	56.9957				47.8701	39.1782	212.551	173.958				110.681	80.4121	114.255	83.0084				173.054	123.926	273.877	196.127
	177.953	227.723		103.841	213.409		111.468	334.409		117.426	109.498				177.953	141.66	227.723	181.279				103.841	84.986	213.409	174.66				111.468	80.9837	334.409	242.955				117.426	84.0906	109.498	78.4126
	44.6274	165.51		86.2548	342.291		113.397	111.498		152.924	89.9828				44.6274	35.5257	165.51	131.754				86.2548	70.5933	342.291	280.141				113.397	82.3852	111.498	81.0052				152.924	109.511	89.9828	64.4379
	68.9411	135.297		127.51	363.735		41.799	36.7279		58.5269	109.125				68.9411	54.8806	135.297	107.703				127.51	104.357	363.735	297.691				41.799	30.3678	36.7279	26.6836				58.5269	41.9119	109.125	78.1458
	115.74	40.2132		70.8701	317.12		26.8995	114.397		103.64	33.2132				115.74	92.135	40.2132	32.0118				70.8701	58.002	317.12	259.54				26.8995	19.543	114.397	83.1117				103.64	74.2177	33.2132	23.7844
	51.4558	149.61		100.77	174.622		49.9706	126.953		213.894	172.468				51.4558	40.9614	149.61	119.097				100.77	82.4726	174.622	142.916				49.9706	36.3046	126.953	92.2341				213.894	153.173	172.468	123.507
	75.6985	162.853		111.941	38.1421		100.698	203.522		51.2843	74.2843				75.6985	60.2599	162.853	129.639				111.941	91.6157	38.1421	31.2165				100.698	73.1595	203.522	147.863				51.2843	36.7254	74.2843	53.196
	184.468	87.4264		25.8284	231.25		126.669	119.569		132.498	156.983				184.468	146.846	87.4264	69.5959				25.8284	21.1387	231.25	189.261				126.669	92.0276	119.569	86.8689				132.498	94.8832	156.983	112.418
	86.6985	151.527		57.2843	199.196		193.953	83.4558		282.078	522.144				86.6985	69.0164	151.527	120.623				57.2843	46.883	199.196	163.027				193.953	140.911	83.4558	60.6323				282.078	202	522.144	373.915
	302.267	167.468		188.338	138.083		155.368	71.0833		535.701	204.297				302.267	240.62	167.468	133.313				188.338	154.141	138.083	113.011				155.368	112.878	71.0833	51.6434				535.701	383.622	204.297	146.299
	189.823	109.024		126.125	173.894		188.267	119.539		135.397	100.426				189.823	151.109	109.024	86.789				126.125	103.224	173.894	142.32				188.267	136.78	119.539	86.8476				135.397	96.9596	100.426	71.9167
	46.799	206.066		81.2843	229.681		31.5563	116.598		42.3848	132.811				46.799	37.2544	206.066	164.039				81.2843	66.5253	229.681	187.977				31.5563	22.9263	116.598	84.7108				42.3848	30.3523	132.811	95.1079
	380.605	207.853		66.669	213.167		88.2254	135.953		32.1421	134.811				380.605	302.981	207.853	165.461				66.669	54.5637	213.167	174.461				88.2254	64.0975	135.953	98.7728				32.1421	23.0174	134.811	96.5401
	100.184	138.77		173.652	119.64		90.1543	139.125		333.664	47.0416				100.184	79.7514	138.77	110.468				173.652	142.121	119.64	97.9163				90.1543	65.4989	139.125	101.077				333.664	238.941	47.0416	33.6871
	80.9706	45.0416		167.995	568.203		57.7279	123.912		134.297	209.551				80.9706	64.4567	45.0416	35.8554				167.995	137.492	568.203	465.033				57.7279	41.9405	123.912	90.0243				134.297	96.1715	209.551	150.063
	93.6985	59.6985		171.48	104.669		179.338	65.3553		120.326	117.326				93.6985	74.5888	59.6985	47.5231				171.48	140.344	104.669	85.664				179.338	130.293	65.3553	47.4819				120.326	86.167	117.326	84.0187
	89.6985	67.8701		94.3259	105.74		72.7696	105.598		85.4264	89.3553				89.6985	71.4046	67.8701	54.0281				94.3259	77.1989	105.74	86.5406				72.7696	52.8686	105.598	76.7191				85.4264	61.175	89.3553	63.9885
	158.368	149.368		122.669	778.754		62.3553	129.154		41.0416	200.238				158.368	126.069	149.368	118.904				122.669	100.396	778.754	637.354				62.3553	45.3024	129.154	93.8332				41.0416	29.3904	200.238	143.393
	132.196	86.4558		106.154	260.321		141.64	105.326		90.397	154.397				132.196	105.235	86.4558	68.8232				106.154	86.8796	260.321	213.054				141.64	102.904	105.326	76.5214				90.397	64.7345	154.397	110.566
	90.4558	56.9706		87.7696	244.995		73.598	114.154		136.267	130.368				90.4558	72.0074	56.9706	45.3515				87.7696	71.833	244.995	200.511				73.598	53.4704	114.154	82.9354				136.267	97.5826	130.368	93.3579
	61.8701	117.184		27.4853	183.539		92.5391	127.355		83.4264	85.0416				61.8701	49.2518	117.184	93.2843				27.4853	22.4947	183.539	150.213				92.5391	67.2315	127.355	92.5262				83.4264	59.7428	85.0416	60.8994
	257.451	230.794		36.2132	316.392		232.037	126.054		410.517	35.2132				257.451	204.944	230.794	183.724				36.2132	29.6379	316.392	258.944				232.037	168.579	126.054	91.5806				410.517	293.977	35.2132	25.2166
	22.9706	227.309		136.569	174.74		93.3259	47.6274		61.3553	173.38				22.9706	18.2858	227.309	180.949				136.569	111.771	174.74	143.012				93.3259	67.8031	47.6274	34.6023				61.3553	43.9374	173.38	124.16
	25.1421	121.698		87.598	229.551		33.7279	95.7401		167.865	183.196				25.1421	20.0144	121.698	96.8782				87.598	71.6926	229.551	187.871				33.7279	24.504	95.7401	69.5571				167.865	120.21	183.196	131.189
	76.7696	198.409		139.225	159.681		66.6985	188.326		81.2843	76.2843				76.7696	61.1125	198.409	157.944				139.225	113.946	159.681	130.687				66.6985	48.4578	188.326	136.823				81.2843	58.2088	76.2843	54.6282
	475.174	82.2548		113.711	241.551		160.74	319.149		178.823	34.3848				475.174	378.263	82.2548	65.479				113.711	93.064	241.551	197.692				160.74	116.781	319.149	231.868				178.823	128.058	34.3848	24.6234
	322.22	170.953		125.468	194.64		136.426	197.61		83.7696	221.225				322.22	256.504	170.953	136.088				125.468	102.686	194.64	159.298				136.426	99.1165	197.61	143.568				83.7696	59.9885	221.225	158.422
	219.853	107.74		35.3848	199.024		97.8406	216.149		83.1127	79.3553				219.853	175.014	107.74	85.7666				35.3848	28.9599	199.024	162.887				97.8406	71.0832	216.149	157.037				83.1127	59.5181	79.3553	56.8274
	83.8406	104.669		90.598	161.841		62.5563	141.368		121.953	181.681				83.8406	66.7414	104.669	83.3219				90.598	74.1479	161.841	132.455				62.5563	45.4484	141.368	102.706				121.953	87.3324	181.681	130.104
	125.882	149.64		100.811	88.7401		53.598	137.054		93.8112	125.983				125.882	100.209	149.64	119.121				100.811	82.5067	88.7401	72.6273				53.598	38.94	137.054	99.5723				93.8112	67.1795	125.983	90.218
	71.4264	128.539		121.054	135.711		202.723	95.5685		161.297	96.6274				71.4264	56.8591	128.539	102.324				121.054	99.0738	135.711	111.069				202.723	147.282	95.5685	69.4324				161.297	115.507	96.6274	69.1962
	107.698	64.2548		439.718	138.669		178.35	61.5269		129.225	134.882				107.698	85.7335	64.2548	51.1501				439.718	359.877	138.669	113.491				178.35	129.575	61.5269	44.7005				129.225	92.5401	134.882	96.591
	55.1421	116.498		92.8406	215.007		28.7279	188.74		115.184	162.468				55.1421	43.8959	116.498	92.738				92.8406	75.9833	215.007	175.968				28.7279	20.8714	188.74	137.123				115.184	82.4847	162.468	116.346
	79.1838	149.711		122.355	83.0416		128.083	312.551		91.4264	111.912				79.1838	63.0344	149.711	119.177				122.355	100.139	83.0416	67.9635				128.083	93.0551	312.551	227.075				91.4264	65.4717	111.912	80.1415
	195.095	95.4558		100.213	153.113		626.926	393.676		190.196	136.012				195.095	155.306	95.4558	75.9877				100.213	82.0172	153.113	125.312				626.926	455.474	393.676	286.014				190.196	136.202	136.012	97.4002
	187.154	174.681		203.238	72.0122		60.1127	59.799		89.9828	185.61				187.154	148.984	174.681	139.055				203.238	166.335	72.0122	58.9368				60.1127	43.6731	59.799	43.4452				89.9828	64.4379	185.61	132.918
	53.9706	142.125		39.7279	180.208		44.2843	114.669		86.5269	182.066				53.9706	42.9634	142.125	113.139				39.7279	32.5144	180.208	147.487				44.2843	32.1734	114.669	83.3093				86.5269	61.9631	182.066	130.38
	55.2843	48.1127		76.0833	408.304		167.894	19.0711		69.3848	200.338				55.2843	44.0091	48.1127	38.3002				76.0833	62.2687	408.304	334.167				167.894	121.979	19.0711	13.8555				69.3848	49.6874	200.338	143.465
	103.426	33.1421		133.64	168.823		134.225	82.8112		208.409	91.3553				103.426	82.3327	33.1421	26.3828				133.64	109.374	168.823	138.17				134.225	97.5174	82.8112	60.164				208.409	149.245	91.3553	65.4208
	200.409	122.024		407.09	31.8995		139.267	83.2132		37.7279	73.2548				200.409	159.536	122.024	97.1377				407.09	333.174	31.8995	26.1074				139.267	101.18	83.2132	60.4561				37.7279	27.0175	73.2548	52.4588
	213.338	150.711		106.811	92.1127		108.456	190.652		62.799	371.392				213.338	169.828	150.711	119.973				106.811	87.4172	92.1127	75.3876				108.456	78.7953	190.652	138.512				62.799	44.9712	371.392	265.959
	165.882	174.095		224.392	373.304		241.965	74.3553		44.5269	64.3848				165.882	132.051	174.095	138.589				224.392	183.648	373.304	305.522				241.965	175.793	74.3553	54.0206				44.5269	31.8863	64.3848	46.1068
	151.995	76.1838		372.404	251.38		184.823	168.894		605.914	219.581				151.995	120.996	76.1838	60.6462				372.404	304.786	251.38	205.736				184.823	134.278	168.894	122.705				605.914	433.903	219.581	157.245
	87.2548	199.208		96.397	154.468		78.598	175.953		331.291	147.953				87.2548	69.4593	199.208	158.58				96.397	78.894	154.468	126.421				78.598	57.103	175.953	127.834				331.291	237.242	147.953	105.951
	52.598	119.882		133.912	182.61		121.225	340.877		101.184	144.983				52.598	41.8707	119.882	95.4324				133.912	109.597	182.61	149.453				121.225	88.0727	340.877	247.654				101.184	72.4591	144.983	103.824
	51.8995	74.6985		73.8701	107.012		86.1543	137.841		108.154	153.267				51.8995	41.3147	74.6985	59.4638				73.8701	60.4573	107.012	87.5817				86.1543	62.5928	137.841	100.144				108.154	77.4508	153.267	109.757
	101.87	218.522		121.468	192.468		103.61	149.841		40.4558	121.426				101.87	81.0938	218.522	173.955				121.468	99.4127	192.468	157.521				103.61	75.2749	149.841	108.862				40.4558	28.9709	121.426	86.9551
	325.161	46.3848		121.811	232.35		103.397	75.3553		74.6985	354.262				325.161	258.845	46.3848	36.9247				121.811	99.6936	232.35	190.162				103.397	75.12	75.3553	54.7471				74.6985	53.4926	354.262	253.692
	232.593	63.799		48.3137	48.5563		360.723	107.397		100.598	125.326				232.593	185.156	63.799	50.7873				48.3137	39.5413	48.5563	39.7398				360.723	262.072	107.397	78.0261				100.598	72.0396	125.326	89.7476
	102.782	221.711		164.953	133.095		23.1421	51.799		144.125	52.3848				102.782	81.8195	221.711	176.493				164.953	135.002	133.095	108.929				23.1421	16.8132	51.799	37.633				144.125	103.21	52.3848	37.5135
	206.894	67.7696		82.4558	307.777		88.1127	265.22		91.4975	168.823				206.894	164.699	67.7696	53.9481				82.4558	67.4841	307.777	251.893				88.1127	64.0156	265.22	192.688				91.4975	65.5226	168.823	120.897
	40.6985	106.083		60.7696	163.782		168.51	322.764		69.4264	78.0122				40.6985	32.3981	106.083	84.4477				60.7696	49.7355	163.782	134.043				168.51	122.426	322.764	234.495				69.4264	49.7172	78.0122	55.8656
	75.0833	102.912		41.799	48.6274		80.1127	331.007		38.799	52.5563				75.0833	59.7701	102.912	81.923				41.799	34.2094	48.6274	39.798				80.1127	58.2035	331.007	240.483				38.799	27.7845	52.5563	37.6363
	104.853	136.811		75.0833	131.983		75.0833	174.238		59.9411	90.9411				104.853	83.4682	136.811	108.909				75.0833	61.4502	131.983	108.018				75.0833	54.5495	174.238	126.587				59.9411	42.9246	90.9411	65.1241
	123.953	182.468		218.936	254.593		68.9411	463.144		101.225	82.7401				123.953	98.6732	182.468	145.254				218.936	179.183	254.593	208.366				68.9411	50.0871	463.144	336.484				101.225	72.4889	82.7401	59.2513
	171.652	53.9706		440.777	136.498		53.2843	300.723		115.468	511.801				171.652	136.644	53.9706	42.9634				440.777	360.744	136.498	111.713				53.2843	38.7121	300.723	218.481				115.468	82.6882	511.801	366.508
	421.262	38.5563		90.0122	99.9117		237.179	225.066		84.0122	97.0833				421.262	335.346	38.5563	30.6928				90.0122	73.6685	99.9117	81.7705				237.179	172.315	225.066	163.515				84.0122	60.1623	97.0833	69.5227
	42.1421	64.8701		121.569	35.2843		54.799	46.9706		173.297	192.853				42.1421	33.5473	64.8701	51.6399				121.569	99.495	35.2843	28.8776				54.799	39.8126	46.9706	34.1251				173.297	124.1	192.853	138.104
	146.196	123.77		34.0711	284.208		94.6985	164.297		38.2132	282.409				146.196	116.379	123.77	98.5269				34.0711	27.8847	284.208	232.604				94.6985	68.8004	164.297	119.365				38.2132	27.365	282.409	202.237
	141.309	89.2548		124.953	220.108		45.0416	106.426		101.841	65.6985				141.309	112.489	89.2548	71.0514				124.953	102.265	220.108	180.142				45.0416	32.7236	106.426	77.3209				101.841	72.9294	65.6985	47.0476
	172.409	165.468		341.333	254.309		25.7279	127.539		246.095	72.2132				172.409	137.247	165.468	131.721				341.333	279.356	254.309	208.133				25.7279	18.6918	127.539	92.6597				246.095	176.232	72.2132	51.7128
	31.9706	169.196		108.213	181.894		228.551	396.877		229.338	167.297				31.9706	25.4502	169.196	134.689				108.213	88.5647	181.894	148.867				228.551	166.047	396.877	288.339				229.338	164.232	167.297	119.803
	99.6985	127.841		109.368	51.2843		80.4558	95.0833		41.6985	73.5269				99.6985	79.3651	127.841	101.768				109.368	89.5094	51.2843	41.9725				80.4558	58.4528	95.0833	69.0799				41.6985	29.8609	73.5269	52.6536
																100		136.724					100		144.197					100		106.969					100		100.566
