# Supplementary material for: CRMP4-mediated fornix development involves Semaphorin-3E signaling pathway
Source: eLife journal article supplement (doi:10.7554/elife.70361), 2021-12-03
Supplement: fig9-data1 [file Figure 9C.xlsx]

## Sheet: Figure 9C
		AKT PAN	Vin AKT PAN	AKT PAN normalisé	AKT PAN Moy duplicats	AKT-P	Vin AKT-P	AKT-P normalisé	AKT-P Moy duplicats	GSK3 PAN	Vin GSK3 PAN	GSK3 PAN normalisé	GSK3 PAN Moy duplicats	GSK3-P	Vin GSK3-P	GSK3-P normalisé	GSK3-P Moy duplicats	CRMP4	Vin CRMP4	CRMP4 normalisé	CRMP4 Moy duplicats	CRMP4-P	Vin CRMP4-P	CRMP4-P normalisé	CRMP4-P Moyenne duplicats
1	ctrl W/O MBCD	1624.78	233.945	6.94514		1703.21	5495.62	0.309922		3874.46	1353.64	2.86225		5719.22	4224.13	1.35394		10111.6	1353.64	7.46992		2020.12	900.611	2.24305
2	ctrl W/O MBCD	1776.97	232.461	7.64416	7.29465	1609.42	5365.98	0.299931	0.304927	3659.72	1405.76	2.60337	2.73281	5658.24	4053.82	1.39578	1.37486	10833.3	1405.76	7.70634	7.58813	2709.91	966.042	2.80516	2.52411
3	sema W/O MBCD	1800.37	232.288	7.75058		3153.46	5864.64	0.537707		3636.08	1438.66	2.5274		8914.05	4196.59	2.12412		10892.1	1438.66	7.57102		1141.53	959.843	1.18929
4	sema W/O MBCD	1826.26	232.043	7.87035	7.81046	3295.58	5825.27	0.565738	0.551723	3801.64	1489.41	2.55245	2.53993	8811.23	4307.39	2.04561	2.08486	10645.6	1489.41	7.14755	7.35929	1158.23	981.124	1.18051	1.1849
5	ctrl W/ MBCD	1715.37	233.34	7.35137		913.127	5086.55	0.179518		3852.92	1495.76	2.5759		4324.69	4293.99	1.00715		12795.8	1495.76	8.55475		2741.07	1020.36	2.68638
6	ctrl W/ MBCD	1730.61	233.453	7.41308	7.38222	1040.29	5263.62	0.197638	0.188578	3696.1	1464.02	2.52463	2.55027	4343.51	4449.42	0.976198	0.991674	11828.1	1464.02	8.07922	8.31699	2913.45	1032.65	2.82132	2.75385
7	sema W/ MBCD	1861.07	235.08	7.91676		995.467	5254.52	0.18945		3364.6	1401.28	2.4011		4179.64	4433.79	0.942678		11102.2	1401.28	7.9229		2844.74	1059.93	2.68389
8	sema W/ MBCD	1669.86	233.692	7.14558	7.53117	984.699	5245.75	0.187714	0.188582	3843.2	1349.53	2.84781	2.62445	4413.13	4716.85	0.93561	0.939144	11878.4	1449.53	8.19467	8.05879	3020.04	1111.52	2.71704	2.70046
		AKT PAN	Vin AKT PAN	AKT PAN normalisé	AKT PAN Moy duplicats	AKT-P	Vin AKT-P	AKT-P normalisé	AKT-P Moy duplicats	GSK3 PAN	Vin GSK3 PAN	GSK3 PAN normalisé	GSK3 PAN Moy duplicats	GSK3-P	Vin GSK3-P	GSK3-P normalisé	GSK3-P Moy duplicats	CRMP4	Vin CRMP4	CRMP4 normalisé	CRMP4 Moy duplicats	CRMP4-P	Vin CRMP4-P	CRMP4-P normalisé	CRMP4-P Moyenne duplicats
1	ctrl W/O MBCD	4597.15	738.911	6.22152		912.182	859.678	1.06107		9722.83	1103.34	8.81217		5549.95	1163.99	4.76803		10111.6	1426.53	7.08825		1210.59	464.421	2.60666
2	ctrl W/O MBCD	4950.74	823.512	6.01174	6.11663	937.747	987.696	0.949429	1.00525	10136.8	1207.61	8.39416	8.60316	5383.64	1387.32	3.88062	4.32432	10833.3	1606.79	6.7422	6.91523	1394.38	501.299	2.78154	2.6941
3	sema W/O MBCD	4990.15	746.323	6.68631		2686.87	1029.95	2.60874		8508.42	1138.89	7.47077		7786.68	1436.27	5.42148		9892.13	1719.07	5.75437		486.183	561.079	0.866514
4	sema W/O MBCD	4862.5	683.076	7.11853	6.90242	2768.05	994.128	2.7844	2.69657	7521.75	1106	6.80084	7.1358	7870.92	1617.43	4.8663	5.14389	10645.6	1708.2	6.23209	5.99323	462.903	514.826	0.899145	0.882829
5	ctrl W/ MBCD	4677.81	741.687	6.30699		305.78	968.41	0.315755		7805.29	1107.63	7.04681		3238.13	1592.56	2.03328		9795.83	1657.21	5.91105		1464.44	489.719	2.99037
6	ctrl W/ MBCD	4968	794.794	6.25068	6.27883	310.792	947.44	0.328033	0.321894	9564.78	1142.79	8.36967	7.70824	3028.56	1505.05	2.01226	2.02277	11828.1	1567.9	7.54392	6.72749	1643.8	554.526	2.96432	2.97735
7	sema W/ MBCD	4980.53	772.185	6.44992		330.154	919.871	0.358913		9454.1	1097.54	8.61391		3231.44	1411.26	2.28976		12102.2	1433.39	8.44306		1381.77	407.498	3.39086
8	sema W/ MBCD	5133.71	808.879	6.3467	6.39831	352.465	910.069	0.387295	0.373104	9460.16	1060.11	8.92375	8.76883	3519.02	1364.76	2.5785	2.43413	11878.4	1415.99	8.38875	8.41591	1572.93	379.33	4.14659	3.76872
				AKT pan	AKT-P	rapport	pool 2 wells	%	means	sem	GSK pan	GSK-P	ratio P/pan	mean ratio	%	mean %	sem	CRMP4	CRMP4-P	ratio P/pan	mean%	%	mean %	sem
	CtrL W/O mbcd	culture 1	well 1	6.94514	0.309922	0.0446243	0.0419305	100			2.86225	1.35394	0.473032	0.504588	100			7.46992	2.24305	0.300278	0.332143	100
			well 2	7.64416	0.299931	0.0392367					2.60337	1.39578	0.536143					7.70634	2.80516	0.364007
		culture 2	well 1	6.22152	1.06107	0.170549	0.164239	100			8.81217	4.76803	0.541073	0.501687	100			7.08825	2.60666	0.367743	0.39015	100
			well 2	6.01174	0.949429	0.157929					8.39416	3.88062	0.4623					6.7422	2.78154	0.412556
	sema W/O mBCD	culture 1	well 3	7.75058	0.537707	0.0693764	0.0706293	168.444	203.15	34.7068	2.5274	2.12412	0.840435	0.820933	162.694	153.166	9.52736	7.57102	1.18929	0.157084	0.161124	48.5104	43.1493	5.36116
			well 4	7.87035	0.565738	0.0718822					2.55245	2.04561	0.801431					7.14755	1.18051	0.165163
		culture 2	well 3	6.68631	2.60874	0.390161	0.390654	237.857			7.47077	5.42148	0.725692	0.720618	143.639			5.75437	0.866514	0.150584	0.14743	37.7881
			well 4	7.11853	2.7844	0.391148					6.80084	4.8663	0.715544					6.23209	0.899145	0.144277
	CtrL W/ MBCD	culture 1	well 5	7.35137	0.179518	0.0244197	0.0255402	100			2.5759	1.00715	0.390989	0.388829	100			8.55475	2.68638	0.314022	0.331615	100
			well 6	7.41308	0.197638	0.0266608					2.52463	0.976198	0.386669					8.07922	2.82132	0.349207
		culture 2	well 5	6.30699	0.315755	0.0500643	0.051272	100			7.04681	2.03328	0.288539	0.264481	100			5.91105	2.99037	0.505895	0.449418	100
			well 6	6.25068	0.328033	0.0524797					8.36967	2.01226	0.240423					7.54392	2.96432	0.392942
	sema W/ MBCD	culture 1	well 7	7.91676	0.18945	0.0239302	0.0251001	98.2766	106.026	7.74912	2.4011	0.942678	0.392603	0.36057	92.7323	98.8056	6.07321	7.9229	2.68389	0.338751	0.335156	101.068	100.372	0.696319
			well 8	7.14558	0.187714	0.0262699					2.84781	0.93561	0.328537					8.19467	2.71704	0.331561
		culture 2	well 7	6.44992	0.358913	0.0556462	0.0583346	113.775			8.61391	2.28976	0.265822	0.277385	104.879			8.44306	3.39086	0.401615	0.447959	99.6753
			well 8	6.3467	0.387295	0.0610231					8.92375	2.5785	0.288948					8.38875	4.14659	0.494304
					AKT pan	AKT-P	rapport	pool 2 wells	%	means	sem	GSK pan	GSK-P	ratio P/pan	mean ratio	%	mean %	sem	CRMP4	CRMP4-P	ratio P/pan	mean%	%	mean %	sem
		CtrL W/O MBCD	culture 1	well 1	6.94514	0.309922	0.0446243	0.0419305	100			2.86225	1.35394	0.473032	0.504588	100			7.46992	2.24305	0.300278	0.332143	100
				well 2	7.64416	0.299931	0.0392367					2.60337	1.39578	0.536143					7.70634	2.80516	0.364007
			culture 2	well 1	6.22152	1.06107	0.170549	0.164239	100			8.81217	4.76803	0.541073	0.501687	100			7.08825	2.60666	0.367743	0.39015	100
				well 2	6.01174	0.949429	0.157929					8.39416	3.88062	0.4623					6.7422	2.78154	0.412556
		CtrL W/ MBCD	culture 1	well 5	7.35137	0.179518	0.0244197	0.0255402	60.9108	46.0644	14.8465	2.5759	1.00715	0.390989	0.388829	77.0588	64.8886	12.1702	8.55475	2.68638	0.314022	0.331615	99.841	107.516	7.67513
				well 6	7.41308	0.197638	0.0266608					2.52463	0.976198	0.386669					8.07922	2.82132	0.349207
			culture 2	well 5	6.30699	0.315755	0.0500643	0.051272	31.2179			7.04681	2.03328	0.288539	0.264481	52.7184			5.91105	2.99037	0.505895	0.449418	115.191
				well 6	6.25068	0.328033	0.0524797					8.36967	2.01226	0.240423					7.54392	2.96432	0.392942
