# Supplementary material for: CRMP4-mediated fornix development involves Semaphorin-3E signaling pathway
Source: eLife journal article supplement (doi:10.7554/elife.70361), 2021-12-03
Supplement: fig10-data1 [file Figure 10-Source Data 1.xlsx]

## Sheet: figure 10B
	randomly selected data values
	KO EGFP Ctrl	KO EGFP Sema3E		KO C4 Ctrl	KO C4 Sema3E		KO C4-4A Ctrl	KO C4-4A Sema3E		KO C4-4D Ctrl	KO C4-4D Sema3E				KO EGFP Ctrl	KO EGFP Ctrl %	KO EGFP Sema3E	KO EGFP Sema3E %					KO C4 Ctrl	KO C4 Ctrl %	KO C4 Sema3E	KO C4 Sema3E %				KO C4-4A Ctrl	KO C4-4A Ctrl %	KO C4-4A Sema3E	KO C4-4A Sema3E %				KO C4-4D Ctrl	KO C4-4D Ctrl %	KO C4-4D Sema3E	KO C4-4D Sema3E %
culture 1	94.2254	254.309	culture 1	88.8406	118.054	culture 1	69.1838	184.309	culture 1	78.4264	114.711	culture 1	mean KO EFGP ctrl	151.996	94.2254	61.9919	254.309	167.312		culture 1	mean KO C4 ctrl	151.278	88.8406	58.7269	118.054	78.0379		mean KO C4 -4Actrl	157.273	69.1838	43.9897	184.309	117.19		mean KO C4-4D ctrl	146.725	78.4264	53.4511	114.711	78.1805
	76.3137	249.806		102.355	69.9411		90.6396	84.5685		92.9828	120.74		normalized mean KO EGFP ctrl	100	76.3137	50.2076	249.806	164.35			normalized mean KO C4 ctrl	100	102.355	67.6606	69.9411	46.2336		normalized mean KO C4-4A ctrl	100	90.6396	57.6321	84.5685	53.7718		normalized meanKO C4-4D ctrl	100	92.9828	63.3719	120.74	82.2898
	113.397	106.326		247.208	76.3259		180.024	729.524		171.953	96.1543		normalized mean KO EGFP sema3E	95.1362	113.397	74.6051	106.326	69.9529			normalized mean KO C4 sema3E	151.987	247.208	163.414	76.3259	50.4542		normalized mean KO C4-4A sema3E	132.785	180.024	114.466	729.524	463.859		normalized mean KO C4-4D sema3E	143.677	171.953	117.194	96.1543	65.5335
	69.1127	62.2132		70.2843	122.054		89.8406	351.363		80.9706	127.912				69.1127	45.47	62.2132	40.9307					70.2843	46.4605	122.054	80.682				89.8406	57.124	351.363	223.41				80.9706	55.1851	127.912	87.1776
	57.9411	145.51		191.823	28.3137		213.794	340.262		147.196	92.397				57.9411	38.1201	145.51	95.7323					191.823	126.802	28.3137	18.7164				213.794	135.938	340.262	216.351				147.196	100.321	92.397	62.9727
	195.51	54.669		260.635	465.174		190.782	83.3848		136.409	181.794				195.51	128.628	54.669	35.9673					260.635	172.289	465.174	307.497				190.782	121.306	83.3848	53.0192				136.409	92.969	181.794	123.901
	49.6274	139.61		96.0833	80.598		56.6985	81.2548		98.8406	101.012				49.6274	32.6504	139.61	91.851					96.0833	63.5146	80.598	53.2782				56.6985	36.051	81.2548	51.6649				98.8406	67.3643	101.012	68.8443
	127.439	75.7696		113.698	702.097		203.208	237.622		71.6274	139.338				127.439	83.8432	75.7696	49.8496					113.698	75.1589	702.097	464.112				203.208	129.207	237.622	151.089				71.6274	48.8173	139.338	94.9652
	79.0416	74.6985		119.385	294.392		233.208	311.291		175.125	291.451				79.0416	52.0023	74.6985	49.1449					119.385	78.9177	294.392	194.604				233.208	148.283	311.291	197.931				175.125	119.355	291.451	198.637
	125.083	144.154		125.154	159.468		183.024	198.368		90.8406	236.35				125.083	82.2936	144.154	94.8406					125.154	82.7316	159.468	105.414				183.024	116.374	198.368	126.13				90.8406	61.9119	236.35	161.083
	109.811	47.0416		133.953	287.066		151.569	177.066		97.1838	179.51				109.811	72.2459	47.0416	30.9492					133.953	88.548	287.066	189.761				151.569	96.373	177.066	112.585				97.1838	66.2351	179.51	122.344
	186.167	124.426		306.392	126.882		82.2843	414.747		147.74	87.6396				186.167	122.481	124.426	81.8614					306.392	202.536	126.882	83.8739				82.2843	52.3195	414.747	263.712				147.74	100.692	87.6396	59.7303
	64.2548	114.326		47.3848	102.527		110.125	263.421		275.108	798.198				64.2548	42.2739	114.326	75.2162					47.3848	31.3231	102.527	67.774				110.125	70.0216	263.421	167.493				275.108	187.498	798.198	544.008
	337.534	544.357		39.8995	79.4558		113.64	156.355		67.7696	264.907				337.534	222.067	544.357	358.138					39.8995	26.375	79.4558	52.5232				113.64	72.2563	156.355	99.4166				67.7696	46.188	264.907	180.546
	122.083	463.446		60.1838	273.978		95.1838	115.74		96.598	90.2254				122.083	80.3199	463.446	304.906					60.1838	39.7837	273.978	181.109				95.1838	60.5214	115.74	73.5919				96.598	65.8359	90.2254	61.4927
	308.978	103.012		72.9117	519.612		55.4558	699.495		85.6985	59.1421				308.978	203.28	103.012	67.7728					72.9117	48.1973	519.612	343.483				55.4558	35.2609	699.495	444.765				85.6985	58.4074	59.1421	40.308
	152.539	86.3259		141.61	317.09		302.149	42.9706		126.255	135.196				152.539	100.357	86.3259	56.7947					141.61	93.6095	317.09	209.608				302.149	192.118	42.9706	27.3223				126.255	86.0483	135.196	92.1421
	120.882	56.2843		107.498	85.8701		187.652	517.617		128.912	197.066				120.882	79.5297	56.2843	37.03					107.498	71.0598	85.8701	56.7633				187.652	119.316	517.617	329.121				128.912	87.8591	197.066	134.309
	234.564	54.1838		250.309	240.38		101.598	109.296		78.9117	343.978				234.564	154.322	54.1838	35.6481					250.309	165.463	240.38	158.9				101.598	64.5998	109.296	69.4948				78.9117	53.7819	343.978	234.436
	73.4558	186.267		35.799	207.953		190.137	112.012		94.1543	102.255				73.4558	48.3273	186.267	122.547					35.799	23.6645	207.953	137.465				190.137	120.896	112.012	71.2216				94.1543	64.1704	102.255	69.6912
	251.363	40.9706		97.9828	261.978		137.196	112.77		89.3553	141.225				251.363	165.374	40.9706	26.955					97.9828	64.7702	261.978	173.177				137.196	87.2344	112.77	71.7032				89.3553	60.8996	141.225	96.2514
	208.392	232.35		168.426	15.4853		186.965	163.924		85.2843	132.024				208.392	137.103	232.35	152.866					168.426	111.336	15.4853	10.2364				186.965	118.88	163.924	104.229				85.2843	58.1251	132.024	89.9805
	44.2132	22.3848		80.4558	14.0711		207.539	66.2843		170.693	139.326				44.2132	29.0883	22.3848	14.7272					80.4558	53.1842	14.0711	9.30151				207.539	131.961	66.2843	42.1461				170.693	116.335	139.326	94.9568
	312.421	118.953		170.853	254.894		419.387	213.38		96.8112	75.2132				312.421	205.545	118.953	78.2606					170.853	112.94	254.894	168.495				419.387	266.662	213.38	135.675				96.8112	65.9812	75.2132	51.2612
	213.137	50.0416		29.8995	142.125		149.882	112.841		78.9828	147.711				213.137	140.225	50.0416	32.9229					29.8995	19.7647	142.125	93.9498				149.882	95.3008	112.841	71.7483				78.9828	53.8303	147.711	100.671
	171.853	37.3137		124.782	304.421		123.368	87.5685		40.5563	102.698				171.853	113.064	37.3137	24.5491					124.782	82.4853	304.421	201.234				123.368	78.4417	87.5685	55.6794				40.5563	27.6409	102.698	69.9936
	69.2843	49.9706		196.066	366.505		167.882	50.799		109.456	422.889				69.2843	45.5829	49.9706	32.8762					196.066	129.607	366.505	242.273				167.882	106.746	50.799	32.2999				109.456	74.599	422.889	288.218
	367.019	88.7401		136.225	658.884		390.961	112.225		127.64	104.841				367.019	241.466	88.7401	58.383					136.225	90.05	658.884	435.547				390.961	248.587	112.225	71.3571				127.64	86.9921	104.841	71.4536
	72.6274	260.309		238.894	192.267		140.468	69.9411		130.498	255.61				72.6274	47.7823	260.309	171.26					238.894	157.918	192.267	127.096				140.468	89.3149	69.9411	44.4712				130.498	88.9399	255.61	174.21
	136.711	129.77		429.061	108.681		217.167	103.669		197.167	99.6985				136.711	89.9434	129.77	85.3768					429.061	283.625	108.681	71.8423				217.167	138.083	103.669	65.9167				197.167	134.378	99.6985	67.949
	71.4975	98.669		148.681	224.421		95.2548	81.3553		153.024	247.309				71.4975	47.0389	98.669	64.9154					148.681	98.2837	224.421	148.351				95.2548	60.5666	81.3553	51.7288				153.024	104.293	247.309	168.552
	95.1249	90.3553		87.598	165.51		197.823	201.995		53.9706	83.0122				95.1249	62.5837	90.3553	59.4457					87.598	57.9055	165.51	109.408				197.823	125.784	201.995	128.436				53.9706	36.7834	83.0122	56.5765
	110.799	78.4975		114.125	115.64		67.598	398.647		130.397	148.397				110.799	72.8958	78.4975	51.6443					114.125	75.4407	115.64	76.442				67.598	42.9814	398.647	253.475				130.397	88.8714	148.397	101.139
	156.965	299.35		107.841	344.333		116.083	202.823		72.7696	314.279				156.965	103.269	299.35	196.946					107.841	71.2866	344.333	227.617				116.083	73.8101	202.823	128.963				72.7696	49.5957	314.279	214.195
	470.588	131.355		123.953	57.5269		116.74	424.676		66.2843	55.6985				470.588	309.605	131.355	86.42					123.953	81.9377	57.5269	38.0274				116.74	74.2278	424.676	270.025				66.2843	45.1757	55.6985	37.961
	237.007	319.664		153.439	103.569		102.083	248.794		266.593	75.2132				237.007	155.929	319.664	210.31					153.439	101.429	103.569	68.4626				102.083	64.9084	248.794	158.193				266.593	181.695	75.2132	51.2612
	351.463	98.9828		95.5685	150.539		399.789	152.811		394.304	172.024				351.463	231.231	98.9828	65.1218					95.5685	63.1743	150.539	99.5119				399.789	254.201	152.811	97.1631				394.304	268.736	172.024	117.242
	44.7279	105.468		73.0122	144.48		65.9706	214.723		342.894	72.598				44.7279	29.427	105.468	69.3885					73.0122	48.2637	144.48	95.5067				65.9706	41.9466	214.723	136.529				342.894	233.698	72.598	49.4788
	123.983	303.35		94.8701	553.73		110.083	218.551		152.882	258.664				123.983	81.5696	303.35	199.577					94.8701	62.7126	553.73	366.036				110.083	69.9951	218.551	138.963				152.882	104.196	258.664	176.291
	649.767	461.889		291.664	68.5685		127.468	124.326		90.0833	111.355				649.767	427.488	461.889	303.882					291.664	192.801	68.5685	45.3263				127.468	81.049	124.326	79.0511				90.0833	61.3958	111.355	75.8936
	169.125	67.1127		213.024	631.754		200.522	109.468		86.2548	107.225				169.125	111.269	67.1127	44.1541					213.024	140.817	631.754	417.613				200.522	127.499	109.468	69.6039				86.2548	58.7865	107.225	73.0789
	71.9411	126.569		82.7696	136.569		126.154	63.6985		256.978	209.095				71.9411	47.3308	126.569	83.2707					82.7696	54.7137	136.569	90.2768				126.154	80.2137	63.6985	40.5019				256.978	175.142	209.095	142.508
	156.953	155.267		145.882	154.439		219.238	205.581		80.2548	196.179				156.953	103.261	155.267	102.152					145.882	96.4336	154.439	102.09				219.238	139.4	205.581	130.716				80.2548	54.6972	196.179	133.705
	319.149	126.267		91.4975	117.64		220.551	274.978		321.522	135.782				319.149	209.972	126.267	83.0724					91.4975	60.4832	117.64	77.7641				220.551	140.235	274.978	174.841				321.522	219.132	135.782	92.5413
	73.6274	79.1127		143.841	63.9411		191.924	130.426		89.0416	37.8995				73.6274	48.4402	79.1127	52.0491					143.841	95.0839	63.9411	42.2674				191.924	122.032	130.426	82.93				89.0416	60.6858	37.8995	25.8302
	102.539	111.113		127.669	118.225		93.9411	117.598		81.397	449.161				102.539	67.4615	111.113	73.1022					127.669	84.3939	118.225	78.1513				93.9411	59.7313	117.598	74.7732				81.397	55.4757	449.161	306.124
	105.397	282.451		36.6274	323.492		366.433	102.77		26.6569	202.037				105.397	69.3418	282.451	185.827					36.6274	24.2121	323.492	213.84				366.433	232.992	102.77	65.3448				26.6569	18.1679	202.037	137.697
	55.0416	130.338		142.669	458.262		86.0122	149.468		204.894	79.8701				55.0416	36.2124	130.338	85.7508					142.669	94.3094	458.262	302.928				86.0122	54.6898	149.468	95.0374				204.894	139.645	79.8701	54.4351
	209.953	70.1127		103.225	78.6985		225.451	176.468		55.2132	442.801				209.953	138.13	70.1127	46.1279					103.225	68.2358	78.6985	52.0226				225.451	143.35	176.468	112.205				55.2132	37.6303	442.801	301.789
	57.0416	445.517		420.12	288.522		148.225	257.593		55.8406	195.167				57.0416	37.5283	445.517	293.11					420.12	277.715	288.522	190.724				148.225	94.2473	257.593	163.787				55.8406	38.0579	195.167	133.015
	210.794	17.6569		176.924	65.2132		479.83	88.598		161.154	96.669				210.794	138.684	17.6569	11.6167					176.924	116.953	65.2132	43.1083				479.83	305.094	88.598	56.3339				161.154	109.834	96.669	65.8843
	104.083	33.5563		245.836	98.4975		274.451	225.297		188.61	84.2254				104.083	68.4775	33.5563	22.077					245.836	162.506	98.4975	65.1105				274.451	174.506	225.297	143.252				188.61	128.546	84.2254	57.4034
	98.9411	40.9706		69.4558	42.2843		141.853	102.154		89.5685	150.782				98.9411	65.0944	40.9706	26.955					69.4558	45.9128	42.2843	27.9515				141.853	90.1954	102.154	64.9536				89.5685	61.0449	150.782	102.764
	330.25	41.6569		134.012	227.279		101.184	163.024		378.421	281.693				330.25	217.275	41.6569	27.4065					134.012	88.587	227.279	150.24				101.184	64.3365	163.024	103.657				378.421	257.911	281.693	191.987
	53.5563	119.711		67.6274	84.0122		205.882	460.99		181.368	134.297				53.5563	35.2352	119.711	78.7589					67.6274	44.7042	84.0122	55.5351				205.882	130.908	460.99	293.115				181.368	123.61	134.297	91.5291
	293.635	418.806		126.64	225.338		163.125	405.546		301.664	116.397				293.635	193.185	418.806	275.537					126.64	83.7134	225.338	148.957				163.125	103.721	405.546	257.862				301.664	205.598	116.397	79.3298
	118.125	136.983		42.5563	486.961		88.669	128.64		39.1421	222.066				118.125	77.7156	136.983	90.1224					42.5563	28.1313	486.961	321.899				88.669	56.3791	128.64	81.7939				39.1421	26.6771	222.066	151.348
	109.539	52.669		118.296	48.8701		396.132	224.095		30.6569	185.894				109.539	72.0669	52.669	34.6515					118.296	78.1983	48.8701	32.3049				396.132	251.876	224.095	142.488				30.6569	20.8941	185.894	126.695
	79.8112	97.6396		68.1127	108.941		106.74	145.823		90.4264	55.3848				79.8112	52.5086	97.6396	64.2381					68.1127	45.025	108.941	72.0141				106.74	67.8694	145.823	92.72				90.4264	61.6296	55.3848	37.7472
	21.7279	80.2548		155.397	1009.13		256.007	63.3848		492.558	306.919				21.7279	14.295	80.2548	52.8005					155.397	102.723	1009.13	667.075				256.007	162.779	63.3848	40.3024				492.558	335.701	306.919	209.179
	104.184	387.789		178.238	320.321		103.225	239.108		134.569	109.498				104.184	68.5436	387.789	255.13					178.238	117.822	320.321	211.744				103.225	65.6346	239.108	152.034				134.569	91.7145	109.498	74.6275
	133.983	36.8995		88.1838	130.61		168.095	486.659		79.6985	69.598				133.983	88.1487	36.8995	24.2766					88.1838	58.2927	130.61	86.3381				168.095	106.881	486.659	309.436				79.6985	54.3181	69.598	47.4342
	106.355	296.25		158.894	207.238		94.2548	199.054		497.961	75.8406				106.355	69.9723	296.25	194.906					158.894	105.035	207.238	136.992				94.2548	59.9308	199.054	126.566				497.961	339.382	75.8406	51.6888
	112.296	142.995		82.1543	216.635		22.9706	80.5269		136.368	167.196				112.296	73.881	142.995	94.0778					82.1543	54.307	216.635	143.203				22.9706	14.6056	80.5269	51.202				136.368	92.9406	167.196	113.952
	83.2254	128.255		53.2132	111.498		110.012	438.647		644.654	130.64				83.2254	54.7549	128.255	84.3802					53.2132	35.1759	111.498	73.7039				110.012	69.9499	438.647	278.908				644.654	439.361	130.64	89.0367
	67.2132	307.463		82.9411	306.652		183.539	146.368		57.3137	107.853				67.2132	44.2203	307.463	202.283					82.9411	54.8271	306.652	202.708				183.539	116.701	146.368	93.066				57.3137	39.0619	107.853	73.5065
	109.598	75.397		117.77	176.48		143.397	347.48		116.811	105.527				109.598	72.1057	75.397	49.6045					117.77	77.85	176.48	116.66				143.397	91.1772	347.48	220.941				116.811	79.6121	105.527	71.9213
	210.794	183.255		174.024	177.752		419.99	391.818		80.0122	117.498				210.794	138.684	183.255	120.565					174.024	115.037	177.752	117.501				419.99	267.045	391.818	249.133				80.0122	54.5319	117.498	80.0798
	94.9117	118.468		141.012	342.576		135.054	49.5563		109.154	121.326				94.9117	62.4434	118.468	77.9413					141.012	93.2142	342.576	226.455				135.054	85.8723	49.5563	31.5098				109.154	74.3936	121.326	82.689
	210.865	134.338		339.546	678.855		90.1127	29.1421		78.6985	377.22				210.865	138.73	134.338	88.3824					339.546	224.452	678.855	448.748				90.1127	57.2971	29.1421	18.5296				78.6985	53.6366	377.22	257.093
	77.5269	97.9117		85.3553	526.115		391.191	70.0416		223.338	155.598				77.5269	51.0058	97.9117	64.4171					85.3553	56.423	526.115	347.781				391.191	248.734	70.0416	44.5351				223.338	152.215	155.598	106.047
	104.77	123.225		70.2843	146.912		80.0416	69.8701		95.7401	131.569				104.77	68.929	123.225	81.0713					70.2843	46.4605	146.912	97.114				80.0416	50.8935	69.8701	44.426				95.7401	65.2512	131.569	89.6698
	95.3553	19.2426		72.5269	59.2843		31.5563	267.108		106.355	486.073				95.3553	62.7352	19.2426	12.6599					72.5269	47.9429	59.2843	39.1891				31.5563	20.0647	267.108	169.837				106.355	72.4859	486.073	331.281
	92.8406	158.51		106.983	198.794		127.912	770.222		96.0833	168.297				92.8406	61.0808	158.51	104.285					106.983	70.7196	198.794	131.41				127.912	81.3311	770.222	489.736				96.0833	65.4851	168.297	114.702
	90.8112	62.4264		506.688	325.865		266.551	47.2843		68.4264	135.355				90.8112	59.7456	62.4264	41.071					506.688	334.94	325.865	215.409				266.551	169.483	47.2843	30.0651				68.4264	46.6357	135.355	92.2507
	68.8112	196.279		91.8701	285.723		88.8406	225.024		95.8823	238.137				68.8112	45.2716	196.279	129.134					91.8701	60.7295	285.723	188.873				88.8406	56.4882	225.024	143.079				95.8823	65.3481	238.137	162.301
	476.458	105.669		55.2843	116.841		91.9117	210.326		112.184	81.8406				476.458	313.467	105.669	69.5207					55.2843	36.545	116.841	77.2359				91.9117	58.4409	210.326	133.733				112.184	76.4583	81.8406	55.778
	60.0833	74.8701		183.267	72.8701		271.563	329.635		49.5563	681.926				60.0833	39.5294	74.8701	49.2578					183.267	121.146	72.8701	48.1698				271.563	172.67	329.635	209.594				49.5563	33.7748	681.926	464.763
	115.912	54.3553		70.6985	123.468		123.125	111.539		130.823	285.421				115.912	76.2595	54.3553	35.7609					70.6985	46.7343	123.468	81.6169				123.125	78.2875	111.539	70.9208				130.823	89.162	285.421	194.527
	82.9828	118.196		86.9411	120.355		97.0416	262.309		231.137	66.3553				82.9828	54.5952	118.196	77.7624					86.9411	57.4713	120.355	79.5593				97.0416	61.7027	262.309	166.786				231.137	157.53	66.3553	45.2241
	148.267	63.8701		104.598	205.208		36.8995	60.4558		59.3553	152.267				148.267	97.5464	63.8701	42.0208					104.598	69.1431	205.208	135.65				36.8995	23.4621	60.4558	38.4401				59.3553	40.4533	152.267	103.777
	334.475	135.61		97.0416	229.48		72.4975	134.468		107.882	79.3848				334.475	220.055	135.61	89.2194					97.0416	64.1481	229.48	151.695				72.4975	46.0966	134.468	85.4998				107.882	73.5266	79.3848	54.1043
	97.598	338.108		153.811	105.225		424.659	307.764		46.7279	501.948				97.598	64.2107	338.108	222.445					153.811	101.675	105.225	69.5579				424.659	270.014	307.764	195.688				46.7279	31.8472	501.948	342.1
	55.5269	124.64		40.7279	288.049		209.267	463.659		108.498	73.8823				55.5269	36.5317	124.64	82.0017					40.7279	26.9226	288.049	190.411				209.267	133.06	463.659	294.812				108.498	73.9459	73.8823	50.3541
	488.642	78.2843		261.907	394.203		161.74	160.995		213.38	57.9706				488.642	321.482	78.2843	51.5041					261.907	173.13	394.203	260.583				161.74	102.84	160.995	102.367				213.38	145.428	57.9706	39.5096
	80.1127	302.078		141.439	287.037		141.912	59.598		89.2548	218.095				80.1127	52.707	302.078	198.74					141.439	93.4961	287.037	189.742				141.912	90.2328	59.598	37.8947				89.2548	60.8311	218.095	148.642
	560.718	183.439		227.095	99.669		69.8406	97.1838		81.598	135.468				560.718	368.902	183.439	120.686					227.095	150.118	99.669	65.8849				69.8406	44.4073	97.1838	61.7931				81.598	55.6127	135.468	92.3275
	41.6985	82.9411		389.233	110.811		60.2132	415.919		114.397	229.723				41.6985	27.4339	82.9411	54.5678					389.233	257.297	110.811	73.2503				60.2132	38.2858	415.919	264.457				114.397	77.9667	229.723	156.566
	374.446	419.617		196.983	323.078		58.2132	263.551		73.5269	281.108				374.446	246.352	419.617	276.071					196.983	130.213	323.078	213.567				58.2132	37.0141	263.551	167.576				73.5269	50.1119	281.108	191.587
	103.841	231.693		114.841	145.74		127.983	18.6569		255.551	265.995				103.841	68.3178	231.693	152.434					114.841	75.9139	145.74	96.3396				127.983	81.3763	18.6569	11.8628				255.551	174.17	265.995	181.287
	52.3553	101.083		137.782	261.38		146.681	212.439		124.912	630.227				52.3553	34.4451	101.083	66.5038					137.782	91.0788	261.38	172.782				146.681	93.2654	212.439	135.076				124.912	85.1329	630.227	429.528
	52.1127	278.007		381.735	248.066		119.841	197.894		152.125	278.238				52.1127	34.2855	278.007	182.904					381.735	252.341	248.066	163.981				119.841	76.1992	197.894	125.829				152.125	103.68	278.238	189.631
	140.095	86.8701		451.203	120.397		95.9828	422.345		679.299	126.539				140.095	92.1703	86.8701	57.1527					451.203	298.262	120.397	79.5868				95.9828	61.0295	422.345	268.543				679.299	462.972	126.539	86.2421
	88.2965	88.468		199.681	184.498		77.1543	328.149		335.12	102.841				88.2965	58.0912	88.468	58.204					199.681	131.997	184.498	121.96				77.1543	49.0576	328.149	208.65				335.12	228.399	102.841	70.0905
	220.48	86.3553		69.8701	322.492		270.522	151.267		207.723	52.8701				220.48	145.056	86.3553	56.8141					69.8701	46.1867	322.492	213.179				270.522	172.008	151.267	96.1813				207.723	141.572	52.8701	36.0333
	72.598	102.698		84.2548	102.012		56.4853	150.882		68.8701	64.3848				72.598	47.763	102.698	67.5664					84.2548	55.6955	102.012	67.4338				56.4853	35.9155	150.882	95.9367				68.8701	46.9381	64.3848	43.8811
	51.3137	134.297		92.7401	103.184		91.0833	83.9117		101.385	353.103				51.3137	33.7598	134.297	88.3551					92.7401	61.3046	103.184	68.2083				91.0833	57.9142	83.9117	53.3542				101.385	69.0983	353.103	240.655
	235.723	321.966		232.865	78.5269		110.184	390.617		166.083	81.669				235.723	155.085	321.966	211.824					232.865	153.932	78.5269	51.9092				110.184	70.059	390.617	248.369				166.083	113.193	81.669	55.6611
	73.5269	74.4975		96.0833	82.8701		212.48	1168.18		88.0416	91.1838				73.5269	48.3741	74.4975	49.0127					96.0833	63.5146	82.8701	54.7802				212.48	135.103	1168.18	742.77				88.0416	60.0043	91.1838	62.1458
	75.3553	208.823		282.149	162.569		926.087	281.806		59.7696	148.912				75.3553	49.577	208.823	137.387					282.149	186.511	162.569	107.464				926.087	588.841	281.806	179.183				59.7696	40.7357	148.912	101.49
	319.706	77.7696		152.48	204.309		48.5563	614.056		25.9706	400.078				319.706	210.338	77.7696	51.1654					152.48	100.795	204.309	135.056				48.5563	30.8739	614.056	390.44				25.9706	17.7001	400.078	272.671
	118.882	270.024		368.99	94.8406		65.3848	129.61		114.841	76.8112				118.882	78.2139	270.024	177.652					368.99	243.916	94.8406	62.6931				65.3848	41.5741	129.61	82.4111				114.841	78.269	76.8112	52.3503
	125.368	71.7696		140.841	207.338		39.799	706.671		184.622	570.387				125.368	82.4806	71.7696	47.218					140.841	93.1008	207.338	137.058				39.799	25.3057	706.671	449.328				184.622	125.828	570.387	388.744
	141.024	60.9411		204.853	293.309		141.669	98.5685		212.179	52.799				141.024	92.7814	60.9411	40.0938					204.853	135.415	293.309	193.888				141.669	90.0785	98.5685	62.6736				212.179	144.609	52.799	35.9849
	131.297	139.983		351.421	176.095		135.711	494.676		323.404	233.179				131.297	86.3813	139.983	92.0961					351.421	232.302	176.095	116.406				135.711	86.29	494.676	314.534				323.404	220.414	233.179	158.922
	149.598	379.588		116.125	32.8701		731.838	172.61		46.3137	176.924				149.598	98.4221	379.588	249.735					116.125	76.7628	32.8701	21.7283				731.838	465.33	172.61	109.752				46.3137	31.5649	176.924	120.582
	300.22	54.4558		64.6274	53.3848		101.113	245.764		150.752	161.723				300.22	197.518	54.4558	35.827					64.6274	42.7211	53.3848	35.2893				101.113	64.2913	245.764	156.266				150.752	102.744	161.723	110.221
	31.799	58.9706		155.752	434.693		85.1838	249.137		133.267	123.77				31.799	20.9209	58.9706	38.7974					155.752	102.958	434.693	287.348				85.1838	54.1631	249.137	158.411				133.267	90.8274	123.77	84.3545
	98.5269	55.8701		84.9828	95.5391		112.811	598.375		121.669	63.6274				98.5269	64.8219	55.8701	36.7575					84.9828	56.1767	95.5391	63.1549				112.811	71.7296	598.375	380.469				121.669	82.9229	63.6274	43.3649
	58.7279	137.326		177.083	271.635		53.1127	267.019		43.3553	291.149				58.7279	38.6377	137.326	90.3481					177.083	117.059	271.635	179.56				53.1127	33.7711	267.019	169.781				43.3553	29.5486	291.149	198.431
	104.698	60.3553		401.161	229.551		82.6274	112.255		211.137	102.113				104.698	68.8822	60.3553	39.7084					401.161	265.182	229.551	151.742				82.6274	52.5376	112.255	71.3758				211.137	143.899	102.113	69.5944
	104.225	87.3553		155.368	361.22		80.8112	568.985		147.912	249.865				104.225	68.571	87.3553	57.472					155.368	102.704	361.22	238.78				80.8112	51.3828	568.985	361.782				147.912	100.808	249.865	170.294
	149.297	208.451		131.782	162.752		62.9706	37.3848		362.09	32.9706				149.297	98.2237	208.451	137.142					131.782	87.1125	162.752	107.585				62.9706	40.0391	37.3848	23.7707				362.09	246.781	32.9706	22.4709
	102.012	105.811		107.326	246.238		194.054	69.0122		471.718	369.706				102.012	67.1149	105.811	69.6143					107.326	70.9464	246.238	162.772				194.054	123.387	69.0122	43.8806				471.718	321.497	369.706	251.971
	175.853	103.882		612.813	74.2843		138.953	190.51		35.9706	147.64				175.853	115.695	103.882	68.3452					612.813	405.092	74.2843	49.1046				138.953	88.3517	190.51	121.133				35.9706	24.5156	147.64	100.623
	224.279	118.368		119.426	597.926		254.238	112.882		105.711	126.711				224.279	147.556	118.368	77.8752					119.426	78.9452	597.926	395.251				254.238	161.654	112.882	71.7748				105.711	72.0466	126.711	86.359
	188.48	108.355		58.6274	367.363		111.811	397.12		126.669	111.225				188.48	124.003	108.355	71.2881					58.6274	38.7549	367.363	242.84				111.811	71.0938	397.12	252.504				126.669	86.3306	111.225	75.8051
	288.576	53.1421		91.1127	57.8995		98.2548	71.9117		203.693	120.439				288.576	189.857	53.1421	34.9627					91.1127	60.2288	57.8995	38.2737				98.2548	62.4741	71.9117	45.7242				203.693	138.826	120.439	82.0843
	97.397	125.439		111.012	187.095		55.5563	90.3259		77.799	124.012				97.397	64.0785	125.439	82.5274					111.012	73.3831	187.095	123.677				55.5563	35.3248	90.3259	57.4326				77.799	53.0235	124.012	84.5199
	95.4264	212.279		107.468	340.161		90.2843	111.397		69.2548	854.097				95.4264	62.782	212.279	139.661					107.468	71.0403	340.161	224.859				90.2843	57.4062	111.397	70.8304				69.2548	47.2003	854.097	582.106
	79.6985	101.012		101.326	40.1421		191.652	74.3848		100.569	139.64				79.6985	52.4345	101.012	66.457					101.326	66.9801	40.1421	26.5354				191.652	121.859	74.3848	47.2967				100.569	68.5419	139.64	95.1706
	60.8995	250.693		130.87	96.2548		92.669	95.5269		26.1421	279.037				60.8995	40.0664	250.693	164.934					130.87	86.5099	96.2548	63.628				92.669	58.9224	95.5269	60.7396				26.1421	17.817	279.037	190.176
	437.316	86.598		122.811	655.696		100.498	68.598		150.326	155.054				437.316	287.715	86.598	56.9737					122.811	81.1827	655.696	433.439				100.498	63.9001	68.598	43.6172				150.326	102.454	155.054	105.676
	70.0122	72.0416		76.3553	400.534		61.2843	58.0122		56.4558	223.752				70.0122	46.0618	72.0416	47.3969					76.3553	50.4737	400.534	264.768				61.2843	38.9669	58.0122	36.8863				56.4558	38.4772	223.752	152.497
	39.5563	189.409		152.326	47.2132		251.208	297.936		136.882	213.823				39.5563	26.0245	189.409	124.614					152.326	100.693	47.2132	31.2097				251.208	159.728	297.936	189.439				136.882	93.2914	213.823	145.73
	85.9411	122.539		92.5269	404.818		241.279	45.8995		317.522	437.061				85.9411	56.5415	122.539	80.6198					92.5269	61.1637	404.818	267.6				241.279	153.414	45.8995	29.1846				317.522	216.405	437.061	297.877
	38.3848	441.375		107.225	148.468		215.61	267.179		326.179	175.024				38.3848	25.2538	441.375	290.385					107.225	70.8799	148.468	98.1428				215.61	137.093	267.179	169.882				326.179	222.305	175.024	119.287
	318.421	57.1838		242.421	268.468		141.61	85.397		173.711	110.669				318.421	209.493	57.1838	37.6218					242.421	160.249	268.468	177.467				141.61	90.0411	85.397	54.2986				173.711	118.392	110.669	75.4259
	106.255	205.652		82.2843	234.179		70.9411	198.953		102.569	81.2132				106.255	69.9061	205.652	135.3					82.2843	54.3929	234.179	154.801				70.9411	45.107	198.953	126.502				102.569	69.905	81.2132	55.3504
	174.924	77.1421		142.811	646.642		36.1421	209.995		93.598	542.269				174.924	115.084	77.1421	50.7526					142.811	94.4034	646.642	427.454				36.1421	22.9805	209.995	133.523				93.598	63.7912	542.269	369.581
	153.297	481.073		102.426	35.3848		306.09	60.2132		78.0416	30.0711				153.297	100.855	481.073	316.503					102.426	67.7076	35.3848	23.3907				306.09	194.624	60.2132	38.2858				78.0416	53.1889	30.0711	20.4948
	77.0833	430.049		110.569	151.64		295.007	35.2132		91.2132	105.426				77.0833	50.7139	430.049	282.934					110.569	73.0898	151.64	100.239				295.007	187.577	35.2132	22.3899				91.2132	62.1659	105.426	71.8528
	77.9706	113.698		80.5269	416.605		162.338	111.569		132.326	266.652				77.9706	51.2977	113.698	74.8034					80.5269	53.2312	416.605	275.391				162.338	103.221	111.569	70.9395				132.326	90.186	266.652	181.735
	164.853	41.8701		125.983	378.706		103.87	624.612		395.647	334.463				164.853	108.458	41.8701	27.5468					125.983	83.2793	378.706	250.338				103.87	66.0445	624.612	397.152				395.647	269.651	334.463	227.952
	128.326	78.9411		62.5563	303.652		146.912	531.919		103.355	208.953				128.326	84.4269	78.9411	51.9362					62.5563	41.352	303.652	200.725				146.912	93.412	531.919	338.214				103.355	70.4413	208.953	142.411
	10.2426	163.569		96.397	320.635		506.299	85.3553		156.853	136.569				10.2426	6.73871	163.569	107.613					96.397	63.722	320.635	211.951				506.299	321.924	85.3553	54.2721				156.853	106.902	136.569	93.0776
	68.7696	91.7401		95.669	327.877		110.569	116.882		83.1838	170.125				68.7696	45.2442	91.7401	60.3568					95.669	63.2407	327.877	216.739				110.569	70.3036	116.882	74.3182				83.1838	56.6935	170.125	115.948
	153.882	136.782		140.983	158.51		475.161	229.409		57.6985	73.2132				153.882	101.241	136.782	89.9901					140.983	93.1948	158.51	104.781				475.161	302.126	229.409	145.867				57.6985	39.3241	73.2132	49.8981
	448.777	128.297		33.0416	119.426		748.11	79.2132		110.983	235.764				448.777	295.255	128.297	84.4076					33.0416	21.8417	119.426	78.9452				748.11	475.676	79.2132	50.3667				110.983	75.6398	235.764	160.684
	534.801	52.5269		181.167	473.961		358.363	128.539		395.848	255.321				534.801	351.851	52.5269	34.558					181.167	119.758	473.961	313.305				358.363	227.86	128.539	81.73				395.848	269.788	255.321	174.013
	83.7696	118.882		42.1421	180.167		110.154	160.912		101.912	712.352				83.7696	55.1129	118.882	78.2139					42.1421	27.8575	180.167	119.097				110.154	70.0403	160.912	102.314				101.912	69.4574	712.352	485.5
	242.948	377.718		342.22	113.498		33.2132	157.669		88.5685	143.154				242.948	159.838	377.718	248.504					342.22	226.22	113.498	75.026				33.2132	21.1182	157.669	100.252				88.5685	60.3634	143.154	97.5661
	192.581	169.238		96.669	193.681		87.4264	44.1421		101.87	534.517				192.581	126.701	169.238	111.343					96.669	63.9018	193.681	128.03				87.4264	55.589	44.1421	28.0672				101.87	69.429	534.517	364.297
	94.2843	178.752		79.8112	197.723		93.598	112.326		49.9706	194.095				94.2843	62.0306	178.752	117.603					79.8112	52.7581	197.723	130.702				93.598	59.5131	112.326	71.421				49.9706	34.0572	194.095	132.285
	18.8995	73.2548		74.5269	97.9411		123.74	143.225		219.208	1211.74				18.8995	12.4342	73.2548	48.1951					74.5269	49.265	97.9411	64.7427				123.74	78.6786	143.225	91.0681				219.208	149.4	1211.74	825.858
	128.255	151.598		142.539	356.848		189.125	88.598		407.563	98.9117				128.255	84.3802	151.598	99.7379					142.539	94.2236	356.848	235.889				189.125	120.253	88.598	56.3339				407.563	277.773	98.9117	67.4128
	57.9411	308.191		243.409	189.267		122.054	120.912		306.764	44.0416				57.9411	38.1201	308.191	202.762					243.409	160.902	189.267	125.112				122.054	77.6064	120.912	76.8802				306.764	209.074	44.0416	30.0163
	38.799	73.9411		449.76	168.61		419.061	88.2548		114.083	331.304				38.799	25.5263	73.9411	48.6466					449.76	297.308	168.61	111.458				419.061	266.455	88.2548	56.1157				114.083	77.7529	331.304	225.798
	198.995	117.882		100.77	76.5269		181.894	74.1838		60.3553	63.598				198.995	130.921	117.882	77.556					100.77	66.6124	76.5269	50.5871				181.894	115.655	74.1838	47.1689				60.3553	41.1348	63.598	43.3449
	57.2843	162.711		199.095	211.652		126.539	158.51		74.2132	117.125				57.2843	37.6879	162.711	107.049					199.095	131.609	211.652	139.91				126.539	80.4583	158.51	100.786				74.2132	50.5796	117.125	79.8259
	261.764	42.9706		88.9828	50.1127		325.35	160.083		85.8701	238.179				261.764	172.218	42.9706	28.2708					88.9828	58.8209	50.1127	33.1263				325.35	206.87	160.083	101.787				85.8701	58.5243	238.179	162.329
	95.8112	98.6396		160.853	258.179		53.598	16.3137		166.782	265.492				95.8112	63.0352	98.6396	64.896					160.853	106.33	258.179	170.666				53.598	34.0796	16.3137	10.3729				166.782	113.669	265.492	180.945
	120.61	179.681		223.451	168.451		113.983	29.8995		47.2843	192.48				120.61	79.3507	179.681	118.214					223.451	147.709	168.451	111.352				113.983	72.4746	29.8995	19.0112				47.2843	32.2264	192.48	131.184
	153.61	192.664		139.498	563.902		539.387	234.664		100.054	93.1543				153.61	101.062	192.664	126.756					139.498	92.213	563.902	372.76				539.387	342.963	234.664	149.208				100.054	68.1912	93.1543	63.4888
	84.6985	72.3553		122.61	254.539		42.2843	114.012		116.326	368.09				84.6985	55.724	72.3553	47.6033					122.61	81.0498	254.539	168.26				42.2843	26.886	114.012	72.4933				116.326	79.2813	368.09	250.87
	397.262	70.6274		71.6985	201.409		362.463	78.9411		94.4264	286.096				397.262	261.363	70.6274	46.4665					71.6985	47.3953	201.409	133.139				362.463	230.468	78.9411	50.1937				94.4264	64.3558	286.096	194.987
	113.113	297.078		102.811	355.622		204.196	235.995		122.569	770.151				113.113	74.418	297.078	195.451					102.811	67.962	355.622	235.079				204.196	129.836	235.995	150.054				122.569	83.5359	770.151	524.893
	59.799	77.2843		109.941	112.368		75.397	103.054		153.439	95.7401				59.799	39.3424	77.2843	50.8461					109.941	72.6751	112.368	74.279				75.397	47.9403	103.054	65.5255				153.439	104.575	95.7401	65.2512
	47.799	76.1543		105.74	301.12		155.095	49.4558		321.078	127.782				47.799	31.4475	76.1543	50.1027					105.74	69.8981	301.12	199.051				155.095	98.6156	49.4558	31.4459				321.078	218.829	127.782	87.089
	100.296	164.225		142.711	214.551		388.99	293.363		141.983	392.492				100.296	65.9861	164.225	108.046					142.711	94.337	214.551	141.826				388.99	247.334	293.363	186.531				141.983	96.7676	392.492	267.501
	346.446	92.4975		65.1127	53.6985		148.711	248.564		162.024	94.598				346.446	227.93	92.4975	60.8551					65.1127	43.0419	53.6985	35.4967				148.711	94.5559	248.564	158.046				162.024	110.427	94.598	64.4728
	142.125	197.61		76.7401	98.0833		85.1127	332.919		37.3848	137.598				142.125	93.5055	197.61	130.01					76.7401	50.728	98.0833	64.8367				85.1127	54.1179	332.919	211.682				37.3848	25.4794	137.598	93.7792
	164.811	84.9828		330.948	111.983		123.882	70.4975		27.3137	108.569				164.811	108.431	84.9828	55.9111					330.948	218.769	111.983	74.0247				123.882	78.769	70.4975	44.825				27.3137	18.6155	108.569	73.9943
	77.3137	132.527		75.0538	83.598		96.3553	194.48		93.5269	88.9411				77.3137	50.8655	132.527	87.1908					75.0538	49.6133	83.598	55.2613				96.3553	61.2663	194.48	123.658				93.5269	63.7428	88.9411	60.6173
	123.125	87.1543		121.054	166.853		67.6985	165.61		98.4264	98.6396				123.125	81.0052	87.1543	57.3397					121.054	80.021	166.853	110.296				67.6985	43.0453	165.61	105.301				98.4264	67.082	98.6396	67.2273
	63.598	104.77		74.9411	701.257		109.941	219.338		165.338	82.0416				63.598	41.8418	104.77	68.929					74.9411	49.5388	701.257	463.557				109.941	69.9047	219.338	139.463				165.338	112.685	82.0416	55.915
	68.5269	110.983		192.61	537.404		129.912	93.5685		82.2254	579.186				68.5269	45.0846	110.983	73.0167					192.61	127.322	537.404	355.244				129.912	82.6028	93.5685	59.4944				82.2254	56.0403	579.186	394.741
	157.012	26.799		98.1249	314.421		106.539	91.7817		224.066	145.711				157.012	103.3	26.799	17.6313					98.1249	64.8642	314.421	207.844				106.539	67.7416	91.7817	58.3583				224.066	152.711	145.711	99.3084
	152.598	98.1838		83.1127	301.35		69.9411	298.392		111.426	85.2843				152.598	100.396	98.1838	64.5961					83.1127	54.9405	301.35	199.204				69.9411	44.4712	298.392	189.729				111.426	75.9421	85.2843	58.1251
	92.0833	125.296		186.823	126.154		237.066	77.9706		115.426	216.149				92.0833	60.5826	125.296	82.4339					186.823	123.497	126.154	83.3926				237.066	150.736	77.9706	49.5766				115.426	78.6683	216.149	147.315
	188.48	77.0833		70.4558	239.48		89.4975	72.2548		86.2548	466.103				188.48	124.003	77.0833	50.7139					70.4558	46.5739	239.48	158.305				89.4975	56.9059	72.2548	45.9423				86.2548	58.7865	466.103	317.67
	216.652	281.966		50.9411	97.9706		53.4264	67.669		234.652	76.0416				216.652	142.537	281.966	185.508					50.9411	33.6739	97.9706	64.7622				53.4264	33.9705	67.669	43.0265				234.652	159.926	76.0416	51.8258
	209.167	64.598		156.338	22.3137		156.581	265.966		171.095	32.1421				209.167	137.613	64.598	42.4997					156.338	103.345	22.3137	14.7502				156.581	99.5599	265.966	169.111				171.095	116.609	32.1421	21.9063
	53.1127	50.5563		92.2254	110.983		35.3848	573.512		136.196	520.433				53.1127	34.9434	50.5563	33.2615					92.2254	60.9644	110.983	73.3637				35.3848	22.499	573.512	364.66				136.196	92.8237	520.433	354.699
	95.6396	51.0122		114.539	145.397		116.426	88.6274		101.598	86.1838				95.6396	62.9223	51.0122	33.5615					114.539	75.7145	145.397	96.1128				116.426	74.0283	88.6274	56.3526				101.598	69.2436	86.1838	58.7381
	292.894	121.64		95.4558	106.054		407.375	65.3553		177.368	107.941				292.894	192.698	121.64	80.028					95.4558	63.0998	106.054	70.1055				407.375	259.024	65.3553	41.5554				177.368	120.884	107.941	73.5667
	325.421	87.4975		112.196	74.5269		116.598	59.6274		140.439	222.137				325.421	214.098	87.4975	57.5655					112.196	74.1657	74.5269	49.265				116.598	74.1374	59.6274	37.9133				140.439	95.7152	222.137	151.396
	107.184	72.0416		105.882	118.426		64.1127	165.64		115.64	54.8701				107.184	70.5173	72.0416	47.3969					105.882	69.9921	118.426	78.2842				64.1127	40.7653	165.64	105.32				115.64	78.8136	54.8701	37.3964
	152.167	214.498		158.912	116.397		183.024	127.924		130.498	118.054				152.167	100.112	214.498	141.12					158.912	105.046	116.397	76.9427				183.024	116.374	127.924	81.3388				130.498	88.9399	118.054	80.459
	516.257	86.669		90.4264	324.877		152.439	123.024		138.669	253.007				516.257	339.651	86.669	57.0204					90.4264	59.7752	324.877	214.756				152.439	96.9262	123.024	78.2236				138.669	94.5091	253.007	172.436
	391.433	118.598		27.0711	123.397		295.794	109.983		65.7696	54.2843				391.433	257.528	118.598	78.0269					27.0711	17.895	123.397	81.5699				295.794	188.077	109.983	69.9312				65.7696	44.8249	54.2843	36.9972
	92.2132	127.296		91.4975	52.3848		79.9828	232.48		133.853	532.257				92.2132	60.668	127.296	83.7497					91.4975	60.4832	52.3848	34.6283				79.9828	50.8561	232.48	147.82				133.853	91.2267	532.257	362.757
	237.451	74.8701		153.539	361.061		363.149	293.38		104.882	134.154				237.451	156.221	74.8701	49.2578					153.539	101.495	361.061	238.675				363.149	230.904	293.38	186.542				104.882	71.482	134.154	91.4322
	223.551	103.912		87.1543	665.884		281.652	106.426		83.4975	80.9411				223.551	147.077	103.912	68.3646					87.1543	57.6122	665.884	440.174				281.652	179.085	106.426	67.6699				83.4975	56.9073	80.9411	55.165
	29.5563	268.007		140.326	301.108		78.669	24.8995		207.965	65.6985				29.5563	19.4454	268.007	176.325					140.326	92.7606	301.108	199.043				78.669	50.0207	24.8995	15.832				207.965	141.738	65.6985	44.7765
	101.698	156.267		222.397	455.534		76.6985	84.0416		138.054	42.0711				101.698	66.9085	156.267	102.81					222.397	147.013	455.534	301.125				76.6985	48.7678	84.0416	53.4368				138.054	94.0899	42.0711	28.6733
	222.723	107.811		339.019	768.328		187.154	495.558		140.297	213.723				222.723	146.532	107.811	70.9301					339.019	224.104	768.328	507.893				187.154	119	495.558	315.095				140.297	95.6184	213.723	145.662
	59.1838	168.054		95.9828	373.463		218.338	44.5563		100.368	75.598				59.1838	38.9376	168.054	110.564					95.9828	63.4482	373.463	246.873				218.338	138.828	44.5563	28.3306				100.368	68.405	75.598	51.5234
	145.711	141.782		88.2843	547.943		93.9411	105.083		373.848	178.066				145.711	95.8646	141.782	93.2797					88.2843	58.3592	547.943	362.211				93.9411	59.7313	105.083	66.8159				373.848	254.794	178.066	121.36
	141.711	98.2132		108.498	261.196		100.64	141.953		110.953	134.125				141.711	93.2329	98.2132	64.6155					108.498	71.7208	261.196	172.66				100.64	63.9905	141.953	90.2593				110.953	75.6196	134.125	91.4121
	110.054	104.113		90.3553	658.997		101.154	54.2843		159.238	359.777				110.054	72.4055	104.113	68.4968					90.3553	59.7282	658.997	435.621				101.154	64.3177	54.2843	34.516				159.238	108.528	359.777	245.204
	119.439	123.64		187.882	71.2843		77.7696	158.468		79.4558	55.8701				119.439	78.5799	123.64	81.3438					187.882	124.197	71.2843	47.1215				77.7696	49.4488	158.468	100.76				79.4558	54.1527	55.8701	38.078
	342.368	91.8406		374.019	194.61		314.279	31.8995		158.468	64.4264				342.368	225.247	91.8406	60.4229					374.019	247.24	194.61	128.644				314.279	199.831	31.8995	20.2829				158.468	108.003	64.4264	43.9095
	246.492	225.409		81.7696	225.723		117.669	191.841		59.0122	37.799				246.492	162.17	225.409	148.299					81.7696	54.0527	225.723	149.211				117.669	74.8184	191.841	121.979				59.0122	40.2195	37.799	25.7617
	113.87	128.711		114.941	249.421		404.789	475.558		80.6985	471.76				113.87	74.9163	128.711	84.6801					114.941	75.9803	249.421	164.877				404.789	257.38	475.558	302.378				80.6985	54.9996	471.76	321.525
	384.605	189.368		39.7279	402.245		399.144	185.853		68.5269	475.245				384.605	253.036	189.368	124.587					39.7279	26.2616	402.245	265.899				399.144	253.791	185.853	118.172				68.5269	46.7042	475.245	323.901
	166.154	62.3553		104.468	151.64		121.811	159.681		200.066	56.7696				166.154	109.315	62.3553	41.0242					104.468	69.0572	151.64	100.239				121.811	77.4522	159.681	101.531				200.066	136.354	56.7696	38.691
	381.919	75.1838		95.9117	422.546		110.569	273.664		53.9706	448.505				381.919	251.268	75.1838	49.4642					95.9117	63.4012	422.546	279.319				110.569	70.3036	273.664	174.006				53.9706	36.7834	448.505	305.676
	66.8701	205.196		181.409	150.882		78.1543	135.196		99.4264	390.99				66.8701	43.9945	205.196	135.001					181.409	119.918	150.882	99.7387				78.1543	49.6935	135.196	85.9627				99.4264	67.7636	390.99	266.477
	84.7696	125.882		118.569	436.517		295.907	168.912		123.498	159.498				84.7696	55.7708	125.882	82.8193					118.569	78.3781	436.517	288.554				295.907	188.149	168.912	107.4				123.498	84.1691	159.498	108.705
	69.6274	109.368		91.6274	91.8112		22.0711	969.975		147.681	256.593				69.6274	45.8086	109.368	71.954					91.6274	60.5691	91.8112	60.6906				22.0711	14.0336	969.975	616.746				147.681	100.651	256.593	174.88
	94.9117	108.498		247.095	611.529		53.5563	246.794		35.4853	458.617				94.9117	62.4434	108.498	71.3816					247.095	163.339	611.529	404.243				53.5563	34.0531	246.794	156.921				35.4853	24.1848	458.617	312.568
	119.355	259.764		146.196	205.267		15.6569	95.3553		373.12	729.027				119.355	78.5251	259.764	170.902					146.196	96.6409	205.267	135.689				15.6569	9.95525	95.3553	60.6305				373.12	254.298	729.027	496.864
	33.0416	99.468		335.019	468.191		51.6985	211.693		224.965	581.328				33.0416	21.7384	99.468	65.441					335.019	221.46	468.191	309.491				51.6985	32.8719	211.693	134.603				224.965	153.324	581.328	396.201
	544.387	161.225		612.257	594.127		69.7696	442.688		176.782	570.914				544.387	358.158	161.225	106.072					612.257	404.724	594.127	392.74				69.7696	44.3621	442.688	281.478				176.782	120.485	570.914	389.103
	130.397	93.9117		98.1127	56.598		100.941	136.669		132.569	264.066				130.397	85.7895	93.9117	61.7855					98.1127	64.8561	56.598	37.4134				100.941	64.1822	136.669	86.8993				132.569	90.3514	264.066	179.973
	144.154	122.539		239.167	60.3848		164.882	403.044		56.7696	172.054				144.154	94.8406	122.539	80.6198					239.167	158.098	60.3848	39.9166				164.882	104.838	403.044	256.27				56.7696	38.691	172.054	117.262
	104.569	43.1421		117.698	196.095		78.2548	60.7696		91.8406	147.64				104.569	68.7967	43.1421	28.3836					117.698	77.803	196.095	129.626				78.2548	49.7574	60.7696	38.6396				91.8406	62.5935	147.64	100.623
	84.7401	52.9706		156.439	199.137		378.948	129.782		43.5563	85.598				84.7401	55.7514	52.9706	34.8499					156.439	103.412	199.137	131.637				378.948	240.95	129.782	82.5201				43.5563	29.6856	85.598	58.3389
	176.267	172.652		32.1421	580.085		101.669	144.426		232.853	163.983				176.267	115.968	172.652	113.589					32.1421	21.2471	580.085	383.458				101.669	64.645	144.426	91.8318				232.853	158.7	163.983	111.762
	288.652	78.0122		170.924	74.1543		106.569	63.4558		64.9411	80.4558				288.652	189.907	78.0122	51.325					170.924	112.987	74.1543	49.0187				106.569	67.7603	63.4558	40.3476				64.9411	44.2603	80.4558	54.8342
	129.225	216.693		341.007	259.622		134.912	58.8701		146.581	76.6274				129.225	85.0187	216.693	142.565					341.007	225.418	259.622	171.62				134.912	85.7819	58.8701	37.4318				146.581	99.9013	76.6274	52.225
	419.132	106.397		472.262	40.2132		141.983	126.77		58.5269	442.144				419.132	275.751	106.397	69.9997					472.262	312.183	40.2132	26.5824				141.983	90.278	126.77	80.6049				58.5269	39.8887	442.144	301.341
	387.576	208.409		241.409	115.012		64.4558	163.652		114.983	52.2843				387.576	254.99	208.409	137.115					241.409	159.58	115.012	76.0273				64.4558	40.9834	163.652	104.056				114.983	78.3659	52.2843	35.6341
	202.179	94.4264		56.5563	191.38		92.0122	253.279		139.953	40.6274				202.179	133.015	94.4264	62.1241					56.5563	37.3858	191.38	126.509				92.0122	58.5048	253.279	161.044				139.953	95.3844	40.6274	27.6894
	94.9411	68.3848		212.752	88.3259		76.3259	630.056		81.8406	93.7401				94.9411	62.4627	68.3848	44.9911					212.752	140.637	88.3259	58.3867				76.3259	48.5309	630.056	400.613				81.8406	55.778	93.7401	63.8881
	125.61	132.811		132.326	105.426		124.054	311.049		137.426	198.794				125.61	82.6403	132.811	87.3779					132.326	87.4723	105.426	69.6907				124.054	78.8781	311.049	197.777				137.426	93.6623	198.794	135.487
	111.912	73.7696		153.912	367.475		250.167	1125.05		105.782	258.61				111.912	73.6279	73.7696	48.5338					153.912	101.741	367.475	242.915				250.167	159.065	1125.05	715.347				105.782	72.095	258.61	176.254
	156.326	240.392		70.4558	202.794		173.326	79.0833		174.368	101.397				156.326	102.848	240.392	158.156					70.4558	46.5739	202.794	134.054				173.326	110.207	79.0833	50.2841				174.368	118.839	101.397	69.1066
	69.598	94.9117		461.701	184.894		321.492	61.3848		295.309	685.926				69.598	45.7892	94.9117	62.4434					461.701	305.201	184.894	122.222				321.492	204.417	61.3848	39.0308				295.309	201.266	685.926	467.489
	78.1421	86.0122		305.208	13.2426		66.598	100.113		95.397	32.1421				78.1421	51.4105	86.0122	56.5883					305.208	201.754	13.2426	8.75384				66.598	42.3455	100.113	63.6554				95.397	65.0173	32.1421	21.9063
	102.154	105.284		132.338	477.973		122.983	801.678		70.1127	129.042				102.154	67.2084	105.284	69.2676					132.338	87.4803	477.973	315.957				122.983	78.1971	801.678	509.737				70.1127	47.7849	129.042	87.9476
	160.711	68.9411		103.012	96.0416		108.154	288.007		154.74	457.392				160.711	105.733	68.9411	45.3571					103.012	68.0948	96.0416	63.487				108.154	68.7686	288.007	183.126				154.74	105.462	457.392	311.733
	151.095	252.764		52.8701	409.233		112.355	268.706		87.0416	203.782				151.095	99.4073	252.764	166.296					52.8701	34.9491	409.233	270.518				112.355	71.4397	268.706	170.853				87.0416	59.3228	203.782	138.886
	94.5685	247.196		191.782	98.397		184.995	70.8406		183.167	213.208				94.5685	62.2176	247.196	162.633					191.782	126.775	98.397	65.044				184.995	117.627	70.8406	45.0431				183.167	124.836	213.208	145.311
	153.539	89.669		84.1127	110.498		83.3259	209.196		65.0122	100.74				153.539	101.015	89.669	58.9942					84.1127	55.6016	110.498	73.0429				83.3259	52.9817	209.196	133.015				65.0122	44.3087	100.74	68.6589
	206.279	125.397		100.083	74.9117		32.9706	76.7696		219.823	172.953				206.279	135.713	125.397	82.5					100.083	66.1587	74.9117	49.5194				32.9706	20.964	76.7696	48.813				219.823	149.82	172.953	117.875
	98.4975	116.782		84.3553	133.64		65.2132	113.012		100.468	145.811				98.4975	64.8025	116.782	76.8319					84.3553	55.7619	133.64	88.3407				65.2132	41.465	113.012	71.8574				100.468	68.4734	145.811	99.3769
	171.125	184.421		224.995	78.799		222.279	120.439		152.811	629.198				171.125	112.585	184.421	121.333					224.995	148.73	78.799	52.089				222.279	141.333	120.439	76.5794				152.811	104.148	629.198	428.827
	66.6274	75.3259		66.1838	110.255		97.0538	64.598		55.3553	94.9411				66.6274	43.8349	75.3259	49.5577					66.1838	43.7499	110.255	72.8825				97.0538	61.7105	64.598	41.0738				55.3553	37.7271	94.9411	64.7066
	228.622	108.355		95.9411	77.7401		190.054	108.326		128.681	403.99				228.622	150.413	108.355	71.2881					95.9411	63.4206	77.7401	51.3891				190.054	120.843	108.326	68.8777				128.681	87.702	403.99	275.337
	68.0416	71.7696		184.238	191.48		127.296	353.421		85.0122	146.841				68.0416	44.7653	71.7696	47.218					184.238	121.788	191.48	126.575				127.296	80.9399	353.421	224.719				85.0122	57.9396	146.841	100.078
	95.4975	328.877		409.877	72.1127		79.8823	177.137		188.894	226.38				95.4975	62.8288	328.877	216.372					409.877	270.944	72.1127	47.6691				79.8823	50.7922	177.137	112.63				188.894	128.74	226.38	154.288
	138.255	208.652		41.4853	53.4558		88.669	305.777		176.752	163.255				138.255	90.9593	208.652	137.274					41.4853	27.4233	53.4558	35.3362				88.669	56.3791	305.777	194.424				176.752	120.465	163.255	111.265
	160.61	90.1543		37.3848	65.2132		157.539	141.397		63.6274	304.38				160.61	105.667	90.1543	59.3135					37.3848	24.7127	65.2132	43.1083				157.539	100.169	141.397	89.9055				63.6274	43.3649	304.38	207.448
	98.799	85.2843		250.309	276.451		94.1838	210.794		204.681	58.2132				98.799	65.0009	85.2843	56.1094					250.309	165.463	276.451	182.744				94.1838	59.8856	210.794	134.031				204.681	139.499	58.2132	39.6749
	68.1838	64.0416		107.74	258.279		62.8701	72.0122		38.4558	76.9411				68.1838	44.8588	64.0416	42.1336					107.74	71.2202	258.279	170.732				62.8701	39.9752	72.0122	45.7881				38.4558	26.2094	76.9411	52.4388
	176.853	47.4558		113.426	96.8823		228.681	82.5685		339.451	381.635				176.853	116.353	47.4558	31.2217					113.426	74.979	96.8823	64.0428				228.681	145.404	82.5685	52.5002				339.451	231.351	381.635	260.101
	77.1127	97.5563		112.811	127.569		160.882	381.635		80.4264	686.394				77.1127	50.7332	97.5563	64.1833					112.811	74.5723	127.569	84.3275				160.882	102.295	381.635	242.658				80.4264	54.8142	686.394	467.808
	74.598	93.3553		172.238	76.0833		65.0122	394.333		63.2843	67.6985				74.598	49.0788	93.3553	61.4194					172.238	113.855	76.0833	50.2939				65.0122	41.3372	394.333	250.732				63.2843	43.1311	67.6985	46.1396
	149.137	235.752		278.35	91.5685		108.882	154.723		158.439	127.811				149.137	98.1189	235.752	155.104					278.35	184	91.5685	60.5301				108.882	69.2315	154.723	98.3787				158.439	107.983	127.811	87.1091
	220.723	384.061		87.0538	137.953		219.48	150.61		52.4558	271.735				220.723	145.216	384.061	252.678					87.0538	57.5458	137.953	91.1922				219.48	139.554	150.61	95.7636				52.4558	35.751	271.735	185.2
	148.811	243.693		193.225	251.752		68.7696	234.35		94.3553	304.907				148.811	97.9044	243.693	160.328					193.225	127.729	251.752	166.418				68.7696	43.7263	234.35	149.009				94.3553	64.3074	304.907	207.808
	238.522	88.2254		183.752	156.681		156.38	141.752		193.569	116.355				238.522	156.926	88.2254	58.0444					183.752	121.467	156.681	103.572				156.38	99.4321	141.752	90.1315				193.569	131.926	116.355	79.3014
	150.882	148.953		260.492	208.723		163.238	125.569		67.0416	245.622				150.882	99.267	148.953	97.9979					260.492	172.195	208.723	137.973				163.238	103.793	125.569	79.8412				67.0416	45.6919	245.622	167.403
	79.8995	85.4264		124.74	491.061		241.522	79.8406		180.782	133.397				79.8995	52.5667	85.4264	56.2029					124.74	82.4578	491.061	324.609				241.522	153.569	79.8406	50.7657				180.782	123.211	133.397	90.916
	92.4975	352.392		92.1838	82.3553		74.8406	143.941		258.149	133.569				92.4975	60.8551	352.392	231.842					92.1838	60.9369	82.3553	54.4399				74.8406	47.5865	143.941	91.5232				258.149	175.94	133.569	91.0329
	98.3259	57.9411		479.316	222.581		103.154	268.534		81.4264	235.894				98.3259	64.6896	57.9411	38.1201					479.316	316.845	222.581	147.134				103.154	65.5894	268.534	170.744				81.4264	55.4957	235.894	160.773
	99.8406	376.593		53.6985	273.563		40.2132	70.4264		192.853	82.669				99.8406	65.6862	376.593	247.764					53.6985	35.4967	273.563	180.836				40.2132	25.5691	70.4264	44.7798				192.853	131.438	82.669	56.3426
	117.882	173.225		186.267	116.154		139.811	128.841		62.5563	283.823				117.882	77.556	173.225	113.967					186.267	123.129	116.154	76.7823				139.811	88.8972	128.841	81.9217				62.5563	42.6349	283.823	193.438
	170.297	173.51		123.296	645.245		130.941	426.688		36.8995	117.51				170.297	112.04	173.51	114.154					123.296	81.5035	645.245	426.53				130.941	83.2573	426.688	271.305				36.8995	25.1487	117.51	80.0881
	124.853	127.669		116.225	42.9411		63.598	88.7401		436.433	171.51				124.853	82.142	127.669	83.9948					116.225	76.8293	42.9411	28.3856				63.598	40.438	88.7401	56.4243				436.433	297.449	171.51	116.892
	118.054	85.669		116.841	116.326		83.8701	51.8995		203.338	254.179				118.054	77.6688	85.669	56.3625					116.841	77.2359	116.326	76.8957				83.8701	53.3278	51.8995	32.9997				203.338	138.584	254.179	173.234
	53.2843	81.598		124.355	537.304		122.598	177.794		87.3259	103.326				53.2843	35.0563	81.598	53.6842					124.355	82.2034	537.304	355.177				122.598	77.9524	177.794	113.048				87.3259	59.5165	103.326	70.4212
	241.35	105.74		1385.08	476.558		100.426	103.498		59.1838	138.924				241.35	158.787	105.74	69.5675					1385.08	915.587	476.558	315.023				100.426	63.8549	103.498	65.8076				59.1838	40.3364	138.924	94.6829
	138.397	219.652		87.4264	267.037		104.498	68.2843		101.598	192.752				138.397	91.0528	219.652	144.511					87.4264	57.7921	267.037	176.521				104.498	66.4435	68.2843	43.4177				101.598	69.2436	192.752	131.369
	165.125	158.095		213.338	128.569		129.882	144.439		132.669	73.7696				165.125	108.637	158.095	104.013					213.338	141.024	128.569	84.9885				129.882	82.5841	144.439	91.8395				132.669	90.4199	73.7696	50.2773
	150.711	112.598		64.8701	359.735		137.882	261.137		71.0833	99.1838				150.711	99.1541	112.598	74.0794					64.8701	42.8815	359.735	237.798				137.882	87.6708	261.137	166.041				71.0833	48.4465	99.1838	67.5982
	104.284	133.698		53.1421	52.4558		162.782	160.841		71.8701	111.598				104.284	68.6097	133.698	87.9616					53.1421	35.1289	52.4558	34.6752				162.782	103.503	160.841	102.269				71.8701	48.9827	111.598	76.059
	74.9411	35.3137		73.7696	333.563		60.0416	133.113		164.167	60.8701				74.9411	49.3045	35.3137	23.2333					73.7696	48.7644	333.563	220.498				60.0416	38.1767	133.113	84.6381				164.167	111.887	60.8701	41.4857
	281.551	81.5269		129.61	193.297		141.468	48.3848		156.723	130.841				281.551	185.236	81.5269	53.6374					129.61	85.6771	193.297	127.776				141.468	89.9507	48.3848	30.7649				156.723	106.814	130.841	89.1737
	94.598	438.818		59.598	260.806		161.297	380.262		119.125	87.1127				94.598	62.237	438.818	288.703					59.598	39.3965	260.806	172.402				161.297	102.558	380.262	241.785				119.125	81.189	87.1127	59.3712
	373.907	221.752		99.669	233.64		108.456	81.4264		446.818	78.2132				373.907	245.997	221.752	145.893					99.669	65.8849	233.64	154.444				108.456	68.9603	81.4264	51.774				446.818	304.527	78.2132	53.3058
	65.9706	62.7696		222.51	87.3259		133.652	400.889		196.723	49.8995				65.9706	43.4027	62.7696	41.2968					222.51	147.087	87.3259	57.7256				133.652	84.9809	400.889	254.901				196.723	134.075	49.8995	34.0087
	45.4853	207.267		171.51	273.037		153.368	202.894		117.012	346.392				45.4853	29.9253	207.267	136.363					171.51	113.374	273.037	180.487				153.368	97.5168	202.894	129.008				117.012	79.7491	346.392	236.082
	229.593	199.48		88.5269	158.51		103.912	354.321		349.777	271.137				229.593	151.052	199.48	131.24					88.5269	58.5195	158.51	104.781				103.912	66.071	354.321	225.291				349.777	238.389	271.137	184.792
	233.409	54.3553		104.598	166.167		123.125	209.551		618.612	86.2132				233.409	153.562	54.3553	35.7609					104.598	69.1431	166.167	109.842				123.125	78.2875	209.551	133.241				618.612	421.612	86.2132	58.7582
	88.2548	231.25		61.7696	69.5269		257.108	404.576		102.941	113.841				88.2548	58.0638	231.25	152.142					61.7696	40.832	69.5269	45.9598				257.108	163.479	404.576	257.244				102.941	70.159	113.841	77.5875
	94.9828	48.7696		75.7696	99.2548		91.9828	278.522		74.4558	250.965				94.9828	62.4902	48.7696	32.086					75.7696	50.0865	99.2548	65.6111				91.9828	58.4861	278.522	177.095				74.4558	50.745	250.965	171.044
	99.3259	72.3848		215.037	177.853		121.426	369.635		75.1838	613.813				99.3259	65.3475	72.3848	47.6227					215.037	142.147	177.853	117.567				121.426	77.2075	369.635	235.028				75.1838	51.2411	613.813	418.341
	227.936	355.487		107.184	454.156		144.498	298.09		32.9706	80.0122				227.936	149.962	355.487	233.879					107.184	70.8524	454.156	300.214				144.498	91.877	298.09	189.537				32.9706	22.4709	80.0122	54.5319
	59.598	151.752		79.669	254.593		73.1838	305.664		117.669	50.799				59.598	39.2101	151.752	99.8394					79.669	52.6641	254.593	168.295				73.1838	46.533	305.664	194.353				117.669	80.1967	50.799	34.6218
	163.225	212.865		114.184	126.397		55.2132	625.37		320.635	80.6274				163.225	107.388	212.865	140.046					114.184	75.4797	126.397	83.5531				55.2132	35.1066	625.37	397.634				320.635	218.527	80.6274	54.9512
	118.184	83.9117		50.6274	42.2132		251.238	152.024		93.4558	192.581				118.184	77.7544	83.9117	55.2064					50.6274	33.4666	42.2132	27.9045				251.238	159.746	152.024	96.6628				93.4558	63.6943	192.581	131.252
	105.912	103.125		62.8701	205.338		44.4853	154.681		110.456	122.953				105.912	69.6804	103.125	67.8469					62.8701	41.5594	205.338	135.736				44.4853	28.2854	154.681	98.3521				110.456	75.2806	122.953	83.7982
	115.284	316.475		101.669	307.451		137.77	64.0416		42.3848	93.1838				115.284	75.8467	316.475	208.212					101.669	67.2069	307.451	203.236				137.77	87.5991	64.0416	40.7201				42.3848	28.8871	93.1838	63.5089
	278.451	111.669		97.9117	78.3553		137.953	98.5685		185.066	97.1249				278.451	183.196	111.669	73.4682					97.9117	64.7232	78.3553	51.7957				137.953	87.7159	98.5685	62.6736				185.066	126.131	97.1249	66.195
	117.711	116.77		156.409	487.203		35.4558	108.841		49.2843	293.22				117.711	77.4431	116.77	76.8239					156.409	103.392	487.203	322.059				35.4558	22.5441	108.841	69.205				49.2843	33.5895	293.22	199.843
	175.823	140.782		159.355	558.784		81.2843	265.137		274.463	222.421				175.823	115.676	140.782	92.6217					159.355	105.34	558.784	369.377				81.2843	51.6836	265.137	168.584				274.463	187.059	222.421	151.59
	101.74	538.529		100.527	81.6985		109.083	78.0122		153.309	263.865				101.74	66.9359	538.529	354.304					100.527	66.452	81.6985	54.0057				109.083	69.3593	78.0122	49.6031				153.309	104.487	263.865	179.836
	132.569	90.6274		123.498	24.1421		216.581	189.853		97.0122	302.066				132.569	87.2182	90.6274	59.6247					123.498	81.6364	24.1421	15.9588				216.581	137.71	189.853	120.716				97.0122	66.1182	302.066	205.872
	167.51	112.77		116.498	54.4558		197.024	113.468		175.894	296.037				167.51	110.206	112.77	74.1923					116.498	77.0091	54.4558	35.9973				197.024	125.276	113.468	72.1472				175.894	119.88	296.037	201.762
	153.74	96.2965		180.924	61.0122		120.882	83.598		347.291	574.571				153.74	101.147	96.2965	63.3545					180.924	119.597	61.0122	40.3313				120.882	76.8615	83.598	53.1548				347.291	236.695	574.571	391.596
	60.9706	108.841		66.8701	38.799		133.267	319.777		59.5269	49.7696				60.9706	40.1132	108.841	71.6074					66.8701	44.2036	38.799	25.6476				133.267	84.7362	319.777	203.326				59.5269	40.5703	49.7696	33.9202
	106.225	194.037		173.439	419.919		99.3848	40.2843		532.056	138.711				106.225	69.8868	194.037	127.659					173.439	114.649	419.919	277.582				99.3848	63.1926	40.2843	25.6143				532.056	362.62	138.711	94.5376
	124.426	119.012		199.095	448.387		45.2843	134.539		111.439	85.8406				124.426	81.8614	119.012	78.2994					199.095	131.609	448.387	296.4				45.2843	28.7935	134.539	85.545				111.439	75.9504	85.8406	58.5042
	102.184	138.61		23.6569	223.823		101.527	151.083		87.1838	479.12				102.184	67.2278	138.61	91.1931					23.6569	15.6381	223.823	147.955				101.527	64.5546	151.083	96.0645				87.1838	59.4197	479.12	326.542
	93.5269	136.711		123.468	253.48		208.024	161.167		76.0122	295.492				93.5269	61.5323	136.711	89.9434					123.468	81.6169	253.48	167.56				208.024	132.27	161.167	102.476				76.0122	51.8057	295.492	201.391
	99.2548	66.0122		104.468	566.789		161.196	1360.21		83.3848	54.1127				99.2548	65.3008	66.0122	43.4301					104.468	69.0572	566.789	374.668				161.196	102.494	1360.21	864.874				83.3848	56.8305	54.1127	36.8802
	87.8112	102.355		107.184	821.896		95.0833	53.9706		205.794	558.333				87.8112	57.7719	102.355	67.3406					107.184	70.8524	821.896	543.304				95.0833	60.4575	53.9706	34.3165				205.794	140.258	558.333	380.529
	362.179	302.433		157.953	110.456		154.095	115.255		174.569	440.605				362.179	238.281	302.433	198.974					157.953	104.413	110.456	73.0153				154.095	97.9797	115.255	73.2833				174.569	118.976	440.605	300.292
	22.8995	63.9411		68.0122	223.635		65.0416	370.961		80.4264	201.811				22.8995	15.0658	63.9411	42.0675					68.0122	44.9586	223.635	147.831				65.0416	41.3559	370.961	235.871				80.4264	54.8142	201.811	137.543
	94.0122	152.409		107.113	109.983		72.7696	116.255		106.439	193.681				94.0122	61.8516	152.409	100.272					107.113	70.8054	109.983	72.7027				72.7696	46.2697	116.255	73.9192				106.439	72.5427	193.681	132.002
	48.6985	39.5563		299.747	70.3848		369.049	182.752		42.4558	382.321				48.6985	32.0393	39.5563	26.0245					299.747	198.144	70.3848	46.5269				369.049	234.655	182.752	116.201				42.4558	28.9355	382.321	260.569
	113.64	145.196		234.137	109.912		244.782	61.2843		226.681	470.534				113.64	74.7647	145.196	95.526					234.137	154.773	109.912	72.6557				244.782	155.641	61.2843	38.9669				226.681	154.493	470.534	320.69
	85.3848	87.0122		148.711	149.368		42.3137	47.7279		113.397	141.397				85.3848	56.1755	87.0122	57.2462					148.711	98.3032	149.368	98.7374				42.3137	26.9046	47.7279	30.3472				113.397	77.2851	141.397	96.3684
	116.296	109.255		128.983	822.867		349.978	184.652		156.054	249.38				116.296	76.5127	109.255	71.8799					128.983	85.2624	822.867	543.945				349.978	222.529	184.652	117.409				156.054	106.358	249.38	169.963
	85.7696	249.267		112.912	467.647		69.8406	258.622		462.233	257.764				85.7696	56.4287	249.267	163.995					112.912	74.6388	467.647	309.132				69.8406	44.4073	258.622	164.442				462.233	315.032	257.764	175.678
	288.865	85.0416		55.3553	80.6985		92.2254	184.782		87.8701	124.853				288.865	190.047	85.0416	55.9498					55.3553	36.5919	80.6985	53.3447				92.2254	58.6404	184.782	117.491				87.8701	59.8874	124.853	85.0928
	54.2843	82.0416		118.983	39.5269		153.468	75.9117		154.752	210.167				54.2843	35.7142	82.0416	53.976					118.983	78.652	39.5269	26.1287				153.468	97.5807	75.9117	48.2675				154.752	105.471	210.167	143.238
culture 2	58.5924	197.296	culture 2	121.364	111.862	culture 2	77.3329	121.481		150.008	116.745		moyenne KO EFGP ctrl	154.711	58.5924	37.8722	197.296	127.526		culture 2	moyenne KO C4 ctrl	152.843	121.364	79.4045	111.862	73.1878	culture 2	moyenne KO C4 ctrl	144.797	77.3329	53.4077	121.481	83.8975	culture 2	moyenne KO C4-4D ctrl	157.412	150.008	95.2966	116.745	74.1652
	414.84	50.3325		33.4372	97.862		218.834	388.543		110.086	691.696		moyenne normalisée KO EGFP ctrl	100	414.84	268.139	50.3325	32.5333			moyenne normalisée KO C4 ctrl	100	33.4372	21.8769	97.862	64.0279		moyenne normalisée KO C4-4A ctrl	100	218.834	151.131	388.543	268.335		moyenne normalisée KO C4-4D ctrl	100	110.086	69.9352	691.696	439.417
	371.36	97.0159		109.154	158.364		207.78	67.6204		137.273	64.15		moyenne normalisée KO EGFP sema3E	101.989	371.36	240.035	97.0159	62.7078			moyenne normalisée KO C4 sema3E	133.156	109.154	71.416	158.364	103.612		moyenne normalisée KO C4-4A sema3E	135.761	207.78	143.497	67.6204	46.7		moyenne normalisée KO C4-4D sema3E	137.804	137.273	87.2059	64.15	40.753
	250.607	71.9536		109.256	78.4933		66.347	167.112		53.3387	104.04				250.607	161.984	71.9536	46.5084					109.256	71.4827	78.4933	51.3556				66.347	45.8206	167.112	115.411				53.3387	33.8848	104.04	66.0944
	239.665	84.2556		103.791	134.924		127.236	188.326		162.133	261.063				239.665	154.911	84.2556	54.46					103.791	67.9068	134.924	88.2766				127.236	87.872	188.326	130.062				162.133	102.999	261.063	165.847
	341.575	91.4565		190.498	477.764		188.222	85.9243		113.388	103.555				341.575	220.783	91.4565	59.1145					190.498	124.637	477.764	312.586				188.222	129.99	85.9243	59.3411				113.388	72.0329	103.555	65.786
	89.44	109.502		51.8814	213.416		61.1776	132.249		111.82	36.3087				89.44	57.811	109.502	70.7787					51.8814	33.9443	213.416	139.631				61.1776	42.2505	132.249	91.3338				111.82	71.0363	36.3087	23.066
	132.19	109.732		145.13	73.6311		72.5329	176.95		160.671	488.557				132.19	85.4432	109.732	70.9268					145.13	94.9535	73.6311	48.1744				72.5329	50.0927	176.95	122.205				160.671	102.071	488.557	310.369
	96.9	63.4934		51.2868	598.687		206.286	368.534		434.175	316.424				96.9	62.6329	63.4934	41.04					51.2868	33.5553	598.687	391.701				206.286	142.465	368.534	254.517				434.175	275.821	316.424	201.017
	106.72	113.694		183.784	162.952		48.6294	117.406		82.9759	100.877				106.72	68.9802	113.694	73.4881					183.784	120.244	162.952	106.614				48.6294	33.5844	117.406	81.0833				82.9759	52.7126	100.877	64.0846
	153.652	95.4509		91.5509	381.126		71.147	124.655		146.782	273.981				153.652	99.3158	95.4509	61.6963					91.5509	59.8988	381.126	249.358				71.147	49.1355	124.655	86.0895				146.782	93.247	273.981	174.053
	209.01	40.2122		99.2804	142.764		89.7846	179.957		69.358	144.8				209.01	135.097	40.2122	25.9918					99.2804	64.9559	142.764	93.406				89.7846	62.0071	179.957	124.282				69.358	44.0614	144.8	91.9881
	81.8474	44.1434		179.898	150.212		48.9306	480.372		70.1646	227.745				81.8474	52.9035	44.1434	28.5328					179.898	117.701	150.212	98.2785				48.9306	33.7924	480.372	331.754				70.1646	44.5739	227.745	144.681
	232.905	209.917		260.996	327.566		227.94	47.6521		256.704	364.67				232.905	150.542	209.917	135.683					260.996	170.761	327.566	214.315				227.94	157.42	47.6521	32.9095				256.704	163.078	364.67	231.666
	195.43	75.4712		81.5626	229.549		140.17	239.07		90.3996	86.3323				195.43	126.319	75.4712	48.782					81.5626	53.3638	229.549	150.186				140.17	96.8046	239.07	165.107				90.3996	57.4287	86.3323	54.8448
	166.9	162.928		63.3946	124.473		314.653	340.502		82.7619	211.253				166.9	107.879	162.928	105.311					63.3946	41.477	124.473	81.4385				314.653	217.305	340.502	235.157				82.7619	52.5766	211.253	134.204
	111.995	143.826		310.888	136.33		61.9047	238.072		175.051	243.978				111.995	72.3898	143.826	92.9643					310.888	203.404	136.33	89.196				61.9047	42.7526	238.072	164.417				175.051	111.206	243.978	154.993
	71.5025	99.4137		80.1695	35.5293		215.733	110.272		120.447	394.138				71.5025	46.2168	99.4137	64.2577					80.1695	52.4523	35.5293	23.2457				215.733	148.989	110.272	76.1559				120.447	76.5169	394.138	250.386
	123.71	244.87		236.258	600.507		111.575	108.567		63.7746	662.896				123.71	79.962	244.87	158.276					236.258	154.576	600.507	392.892				111.575	77.0561	108.567	74.9787				63.7746	40.5145	662.896	421.122
	47.0225	105.063		116.463	103.376		60.3541	123.766		109.248	52.1009				47.0225	30.3938	105.063	67.909					116.463	76.1981	103.376	67.6353				60.3541	41.6817	123.766	85.4754				109.248	69.4029	52.1009	33.0985
	180.8	132.567		265.086	157.556		42.7729	207.961		90.7023	183.412				180.8	116.863	132.567	85.6871					265.086	173.437	157.556	103.084				42.7729	29.5398	207.961	143.622				90.7023	57.621	183.412	116.517
	279.01	150.181		101.064	164.772		112.523	91.2451		238.902	146.672				279.01	180.343	150.181	97.072					101.064	66.1229	164.772	107.805				112.523	77.711	91.2451	63.0157				238.902	151.768	146.672	93.1771
	125.707	106.767		1405.75	69.1726		36.6153	68.2575		179.841	418.134				125.707	81.2531	106.767	69.0108					1405.75	919.738	69.1726	45.2573				36.6153	25.2873	68.2575	47.14				179.841	114.249	418.134	265.631
	54.6149	114.4		54.404	258.669		337.006	95.2914		273.467	239.094				54.6149	35.3013	114.4	73.9446					54.404	35.5947	258.669	169.238				337.006	232.743	95.2914	65.8102				273.467	173.727	239.094	151.891
	191.815	382.249		118.565	105.077		199.686	61.4675		109.752	240.052				191.815	123.983	382.249	247.073					118.565	77.5734	105.077	68.7487				199.686	137.907	61.4675	42.4507				109.752	69.723	240.052	152.499
	91.4499	849.557		361.158	120.612		102.333	301.397		99.1467	387.779				91.4499	59.1102	849.557	549.126					361.158	236.294	120.612	78.9125				102.333	70.6731	301.397	208.151				99.1467	62.9855	387.779	246.347
	102.392	84.9301		103.863	637.144		96.3682	113.75		81.2557	162.294				102.392	66.1831	84.9301	54.896					103.863	67.954	637.144	416.862				96.3682	66.5538	113.75	78.5581				81.2557	51.6198	162.294	103.102
	105.7	228.3		36.236	114.021		60.8482	128.799		145.351	87.6557				105.7	68.3209	228.3	147.566					36.236	23.708	114.021	74.6004				60.8482	42.023	128.799	88.9514				145.351	92.3382	87.6557	55.6856
	157.092	379.735		110.025	55.614		91.4435	88.7082		76.0378	59.4489				157.092	101.539	379.735	245.448					110.025	71.9857	55.614	36.3864				91.4435	63.1527	88.7082	61.2637				76.0378	48.305	59.4489	37.7664
	179.852	220.686		142.998	371.402		90.4435	317.985		63.6989	174.772				179.852	116.251	220.686	142.644					142.998	93.5586	371.402	242.996				90.4435	62.4621	317.985	219.607				63.6989	40.4664	174.772	111.028
	79.035	144.469		104.878	159.155		67.0058	264.87		126.351	85.8154				79.035	51.0856	144.469	93.3798					104.878	68.6181	159.155	104.13				67.0058	46.2756	264.87	182.925				126.351	80.2678	85.8154	54.5165
	106.647	248.649		137.965	127.607		178.952	52.0315		94.0043	59.2661				106.647	68.9333	248.649	160.718					137.965	90.2658	127.607	83.4888				178.952	123.588	52.0315	35.934				94.0043	59.7187	59.2661	37.6503
	89.0899	137.803		94.0312	310.744		91.4435	146.409		185.866	49.4228				89.0899	57.5848	137.803	89.0711					94.0312	61.5215	310.744	203.31				91.4435	63.1527	146.409	101.113				185.866	118.076	49.4228	31.3971
	114.705	106.138		107.545	44.6026		89.7164	158.284		111.882	80.2321				114.705	74.1414	106.138	68.6038					107.545	70.3629	44.6026	29.182				89.7164	61.96	158.284	109.314				111.882	71.0761	80.2321	50.9695
	294.757	204.561		144.187	230.68		200.73	222.207		73.8764	450.507				294.757	190.521	204.561	132.221					144.187	94.3366	230.68	150.926				200.73	138.628	222.207	153.461				73.8764	46.9319	450.507	286.196
	70.3074	140.213		48.6622	38.0764		142.625	186.386		182.337	96.2201				70.3074	45.4444	140.213	90.6293					48.6622	31.8381	38.0764	24.9121				142.625	98.4994	186.386	128.722				182.337	115.834	96.2201	61.1263
	102.247	232.924		114.403	267.494		32.8718	34.3361		85.7741	45.5282				102.247	66.0893	232.924	150.555					114.403	74.8504	267.494	175.013				32.8718	22.7019	34.3361	23.7132				85.7741	54.4902	45.5282	28.9229
	94.335	69.5428		155.64	131.623		105.446	479.516		113.508	211.039				94.335	60.975	69.5428	44.9502					155.64	101.83	131.623	86.1169				105.446	72.823	479.516	331.163				113.508	72.1091	211.039	134.068
	147.737	119.546		413.037	433.955		175.003	413.568		412.094	152.268				147.737	95.4925	119.546	77.2707					413.037	270.237	433.955	283.923				175.003	120.861	413.568	285.618				412.094	261.794	152.268	96.7323
	51.1025	163.068		295.939	256.693		86.74	70.2379		149.687	251.219				51.1025	33.0309	163.068	105.402					295.939	193.623	256.693	167.946				86.74	59.9044	70.2379	48.5077				149.687	95.0926	251.219	159.593
	107.565	39.767		82.7518	285.123		189.937	141.129		99.6504	111.527				107.565	69.5264	39.767	25.704					82.7518	54.1418	285.123	186.547				189.937	131.175	141.129	97.4663				99.6504	63.3055	111.527	70.8503
	395.737	57.1962		112.229	62.8673		87.6035	158.686		197.14	97.058				395.737	255.791	57.1962	36.9697					112.229	73.4278	62.8673	41.132				87.6035	60.5007	158.686	109.592				197.14	125.238	97.058	61.6586
	76.675	66.3178		91.6828	288.71		81.0764	228.595		79.7809	44.0221				76.675	49.5602	66.3178	42.8657					91.6828	59.985	288.71	188.893				81.0764	55.993	228.595	157.872				79.7809	50.6829	44.0221	27.9661
	85.2999	129.851		49.6772	230.954		100.509	61.4675		218.105	124.168				85.2999	55.135	129.851	83.9313					49.6772	32.5022	230.954	151.106				100.509	69.4138	61.4675	42.4507				218.105	138.557	124.168	78.8812
	126.872	200.337		250.816	356.621		141.596	309.863		60.8693	180.595				126.872	82.0061	200.337	129.491					250.816	164.101	356.621	233.325				141.596	97.7893	309.863	213.998				60.8693	38.6688	180.595	114.728
	112.2	113.847		106.067	88.0349		69.0223	61.1633		361.635	109.504				112.2	72.5223	113.847	73.5869					106.067	69.3961	88.0349	57.5984				69.0223	47.6682	61.1633	42.2406				361.635	229.738	109.504	69.5652
	215.185	44.5887		79.1844	257.317		91.2788	100.239		137.165	106.612				215.185	139.088	44.5887	28.8206					79.1844	51.8077	257.317	168.354				91.2788	63.0389	100.239	69.227				137.165	87.1379	106.612	67.7278
	242.32	128.789		108.619	333.402		110.74	289.12		107.011	226.207				242.32	156.627	128.789	83.2449					108.619	71.0661	333.402	218.134				110.74	76.4793	289.12	199.672				107.011	67.9817	226.207	143.704
	141.575	129.419		154.667	302.543		119.215	322.611		164.918	82.5891				141.575	91.5093	129.419	83.652					154.667	101.194	302.543	197.944				119.215	82.3324	322.611	222.802				164.918	104.769	82.5891	52.4669
	1014.86	145.881		78.4878	156.727		200.196	130.183		150.966	60.2554				1014.86	655.973	145.881	94.2926					78.4878	51.352	156.727	102.541				200.196	138.26	130.183	89.9069				150.966	95.9051	60.2554	38.2788
	121.452	303.213		155.033	106.429		231.161	217.397		167.2	170.997				121.452	78.5028	303.213	195.987					155.033	101.433	106.429	69.633				231.161	159.644	217.397	150.139				167.2	106.218	170.997	108.63
	79.065	192.259		120.668	102.751		282.507	403.121		156.184	55.8128				79.065	51.105	192.259	124.27					120.668	78.9488	102.751	67.2267				282.507	195.105	403.121	278.404				156.184	99.22	55.8128	35.4565
	118.64	490.163		239.982	107.678		161.029	342.499		475.679	144.283				118.64	76.6849	490.163	316.825					239.982	157.012	107.678	70.4502				161.029	111.21	342.499	236.537				475.679	302.187	144.283	91.6597
	156.772	152.178		102.181	160.195		75.987	471.739		99.7261	263.514				156.772	101.332	152.178	98.3629					102.181	66.8538	160.195	104.81				75.987	52.4782	471.739	325.793				99.7261	63.3536	263.514	167.404
	84.34	231.665		84.0852	336.224		118.119	75.3518		151.086	118.723				84.34	54.5146	231.665	149.74					84.0852	55.0142	336.224	219.98				118.119	81.5752	75.3518	52.0395				151.086	95.9814	118.723	75.4221
	315.567	353.643		65.2928	455.677		176.895	390.632		385.746	153.654				315.567	203.972	353.643	228.583					65.2928	42.7189	455.677	298.134				176.895	122.167	390.632	269.779				385.746	245.055	153.654	97.6129
	54.76	58.64		88.1452	62.1133		58.2011	116.964		45.1528	162.294				54.76	35.395	58.64	37.9029					88.1452	57.6705	62.1133	40.6387				58.2011	40.1948	116.964	80.7779				45.1528	28.6845	162.294	103.102
	124.627	116.105		99.4968	250.349		44.5282	45.9761		157.646	186.758				124.627	80.555	116.105	75.0465					99.4968	65.0975	250.349	163.795				44.5282	30.7521	45.9761	31.752				157.646	100.149	186.758	118.643
	148.51	504.264		85.3042	155.763		204.542	120.276		78.2434	148.512				148.51	95.9919	504.264	325.94					85.3042	55.8118	155.763	101.911				204.542	141.261	120.276	83.0651				78.2434	49.7061	148.512	94.3461
	125.562	186.317		82.8961	223.076		80.9117	73.5093		157.4	44.9357				125.562	81.1594	186.317	120.429					82.8961	54.2362	223.076	145.951				80.9117	55.8793	73.5093	50.767				157.4	99.9927	44.9357	28.5466
	249.605	286.44		117.971	211.612		64.0576	92.3411		434.825	506.266				249.605	161.336	286.44	185.145					117.971	77.1844	211.612	138.451				64.0576	44.2394	92.3411	63.7726				434.825	276.234	506.266	321.618
	193.842	137.344		74.7761	41.964		74.3281	230.174		120.888	178.194				193.842	125.293	137.344	88.7747					74.7761	48.9236	41.964	27.4557				74.3281	51.3325	230.174	158.963				120.888	76.7971	178.194	113.202
	111.017	123		71.4126	89.3866		505.893	258.774		192.167	81.7382				111.017	71.7579	123	79.5033					71.4126	46.7229	89.3866	58.4827				505.893	349.38	258.774	178.715				192.167	122.079	81.7382	51.9263
	691.049	185.701		116.157	174.873		117.363	109.067		62.968	577.647				691.049	446.671	185.701	120.031					116.157	75.9978	174.873	114.414				117.363	81.0536	109.067	75.3235				62.968	40.002	577.647	366.965
	238.487	515.981		73.5148	327.36		246.123	196.488		364.78	268.121				238.487	154.15	515.981	333.513					73.5148	48.0983	327.36	214.181				246.123	169.978	196.488	135.698				364.78	231.736	268.121	170.331
	157.225	125.704		103.268	173.156		67.5964	496.087		99.9089	58.5667				157.225	101.625	125.704	81.2507					103.268	67.565	173.156	113.29				67.5964	46.6834	496.087	342.607				99.9089	63.4697	58.5667	37.206
	97.9624	224.185		42.6742	72.4356		103.06	386.367		28.5096	148.525				97.9624	63.3196	224.185	144.905					42.6742	27.9204	72.4356	47.3923				103.06	71.1753	386.367	266.833				28.5096	18.1115	148.525	94.3544
	113.425	141.32		84.1574	413.536		178.968	343.371		124.524	134.226				113.425	73.3141	141.32	91.3446					84.1574	55.0614	413.536	270.563				178.968	123.599	343.371	237.139				124.524	79.107	134.226	85.2705
	128.285	190.064		89.3045	101.254		159.575	162.371		103.18	230.133				128.285	82.9191	190.064	122.851					89.3045	58.429	101.254	66.2474				159.575	110.206	162.371	112.137				103.18	65.5475	230.133	146.198
	254.705	44.4042		170.853	83.5118		102.963	196.419		72.8741	63.7089				254.705	164.633	44.4042	28.7014					170.853	111.783	83.5118	54.639				102.963	71.1087	196.419	135.651				72.8741	46.2951	63.7089	40.4727
	389.967	67.1319		342.497	49.0879		175.003	269.846		246.281	296.453				389.967	252.062	67.1319	43.3919					342.497	224.085	49.0879	32.1166				175.003	120.861	269.846	186.361				246.281	156.456	296.453	188.329
	81.8174	84.2239		179.478	86.9956		119.05	378.579		130.246	344.681				81.8174	52.8841	84.2239	54.4395					179.478	117.426	86.9956	56.9184				119.05	82.2187	378.579	261.454				130.246	82.742	344.681	218.967
	97.2199	224.14		316.047	243.565		115.347	244.35		56.8678	316.638				97.2199	62.8397	224.14	144.877					316.047	206.779	243.565	159.356				115.347	79.661	244.35	168.753				56.8678	36.1267	316.638	201.153
	62.28	128.483		99.4844	139.512		96.4364	382.183		50.9189	40.493				62.28	40.2557	128.483	83.0474					99.4844	65.0894	139.512	91.2784				96.4364	66.601	382.183	263.943				50.9189	32.3475	40.493	25.7242
	134.507	181.432		158.583	88.2558		48.3964	411.616		92.1954	89.496				134.507	86.9411	181.432	117.272					158.583	103.756	88.2558	57.7429				48.3964	33.4235	411.616	284.27				92.1954	58.5695	89.496	56.8546
	215.42	35.3589		123.683	147.105		185.592	429.088		112.778	142.973				215.42	139.24	35.3589	22.8548					123.683	80.9215	147.105	96.2457				185.592	128.173	429.088	296.337				112.778	71.6448	142.973	90.8273
	142.812	96.3414		90.0732	44.6026		207.217	288.678		86.3537	56.3609				142.812	92.3092	96.3414	62.2719					90.0732	58.9319	44.6026	29.182				207.217	143.109	288.678	199.367				86.3537	54.8584	56.3609	35.8047
	326.51	189.65		55.0706	616.758		136.069	241.343		239.708	469.374				326.51	211.045	189.65	122.584					55.0706	36.0309	616.758	403.525				136.069	93.9722	241.343	166.676				239.708	152.281	469.374	298.182
	100.877	382.407		75.5448	37.4787		54.2247	76.2529		174.957	276.993				100.877	65.2038	382.407	247.175					75.5448	49.4265	37.4787	24.5211				54.2247	37.4486	76.2529	52.6618				174.957	111.146	276.993	175.967
	124.935	451.189		284.324	217.056		50.7541	685.151		118.317	314.42				124.935	80.7538	451.189	291.633					284.324	186.024	217.056	142.013				50.7541	35.0518	685.151	473.179				118.317	75.1637	314.42	199.743
	86.875	271.822		88.812	502.894		225.73	162.761		110.924	103.568				86.875	56.1531	271.822	175.697					88.812	58.1068	502.894	329.027				225.73	155.894	162.761	112.406				110.924	70.4675	103.568	65.7942
	122.895	73.3212		92.2052	194.242		136.535	179.36		87.7971	169.963				122.895	79.4352	73.3212	47.3924					92.2052	60.3268	194.242	127.086				136.535	94.2939	179.36	123.87				87.7971	55.7754	169.963	107.974
	156.38	190.261		77.4006	65.3764		162.921	184.917		168.857	67.8619				156.38	101.079	190.261	122.979					77.4006	50.6407	65.3764	42.7736				162.921	112.517	184.917	127.707				168.857	107.271	67.8619	43.111
	78.9924	68.7604		133.658	394.571		64.2906	113.056		177.743	133.25				78.9924	51.0581	68.7604	44.4444					133.658	87.4483	394.571	258.155				64.2906	44.4004	113.056	78.0786				177.743	112.915	133.25	84.6502
	112.49	61.2036		242.654	264.323		117.5	91.5779		182.444	136.57				112.49	72.7098	61.2036	39.56					242.654	158.761	264.323	172.938				117.5	81.1478	91.5779	63.2455				182.444	115.902	136.57	86.7596
	196.872	98.8286		83.2866	65.9095		112.029	47.7496		342.068	269.583				196.872	127.252	98.8286	63.8796					83.2866	54.4917	65.9095	43.1224				112.029	77.3697	47.7496	32.9768				342.068	217.308	269.583	171.259
	134.755	253.426		158.655	184.921		239.46	176.313		291.042	56.8778				134.755	87.1011	253.426	163.806					158.655	103.803	184.921	120.988				239.46	165.376	176.313	121.765				291.042	184.892	56.8778	36.1331
	160.925	44.3278		107.863	25.7402		99.1235	409.355		270.014	616.963				160.925	104.016	44.3278	28.652					107.863	70.5712	25.7402	16.8409				99.1235	68.4567	409.355	282.709				270.014	171.533	616.963	391.942
	156	116.582		53.7372	34.3071		59.6553	379.744		107.225	327.351				156	100.833	116.582	75.3547					53.7372	35.1585	34.3071	22.446				59.6553	41.1991	379.744	262.259				107.225	68.1177	327.351	207.958
	60.5299	94.0069		109.01	151.994		47.834	124.363		466.744	67.5278				60.5299	39.1245	94.0069	60.763					109.01	71.3216	151.994	99.4445				47.834	33.0352	124.363	85.8875				466.744	296.511	67.5278	42.8988
	526.992	147.14		347.254	225.909		233.41	203.444		153.978	63.1163				526.992	340.63	147.14	95.1066					347.254	227.197	225.909	147.805				233.41	161.198	203.444	140.503				153.978	97.8187	63.1163	40.0963
	111.922	117.549		137.821	372.559		45.914	284.242		83.4614	136.356				111.922	72.3429	117.549	75.9797					137.821	90.1715	372.559	243.753				45.914	31.7092	284.242	196.303				83.4614	53.021	136.356	86.6236
	79.2099	109.133		335.813	184.727		189.21	57.4901		52.8975	146.868				79.2099	51.1986	109.133	70.5402					335.813	219.711	184.727	120.861				189.21	130.673	57.4901	39.7038				52.8975	33.6045	146.868	93.3014
	79.065	95.7881		93.8148	163.63		99.0153	145.772		308.234	47.0343				79.065	51.105	95.7881	61.9143					93.8148	61.3799	163.63	107.058				99.0153	68.382	145.772	100.673				308.234	195.813	47.0343	29.8798
	79.3849	123.14		108.734	155.66		146.629	161.263		176.936	119.392				79.3849	51.3118	123.14	79.5936					108.734	71.1409	155.66	101.844				146.629	101.265	161.263	111.372				176.936	112.403	119.392	75.8466
	160.562	107.613		144.577	11.0508		96.4081	311.556		84.161	114.325				160.562	103.782	107.613	69.5575					144.577	94.5921	11.0508	7.23015				96.4081	66.5814	311.556	215.167				84.161	53.4654	114.325	72.6279
	76.5	125.182		71.659	512.15		93.6246	255.325		44.8943	119.94				76.5	49.447	125.182	80.9135					71.659	46.8841	512.15	335.083				93.6246	64.659	255.325	176.332				44.8943	28.5203	119.94	76.1949
	313.805	77.5447		68.9324	252.094		223.18	1132.81		107.515	103.082				313.805	202.833	77.5447	50.1223					68.9324	45.1002	252.094	164.937				223.18	154.133	1132.81	782.342				107.515	68.3018	103.082	65.4858
	119.762	112.727		344.005	266.897		240.488	40.6268		79.4154	203.571				119.762	77.4105	112.727	72.8632					344.005	225.071	266.897	174.622				240.488	166.086	40.6268	28.0577				79.4154	50.4507	203.571	129.324
	655.077	83.7023		53.9114	314.776		63.0693	81.0743		20.8718	85.9982				655.077	423.42	83.7023	54.1024					53.9114	35.2725	314.776	205.948				63.0693	43.557	81.0743	55.9916				20.8718	13.2594	85.9982	54.6326
	233.067	144.513		109.154	287.853		53.4011	137.375		420.053	205.228				233.067	150.647	144.513	93.4087					109.154	71.416	287.853	188.333				53.4011	36.8799	137.375	94.8737				420.053	266.85	205.228	130.377
	149.952	141.536		250.192	39.2987		53.3329	55.9518		137.38	87.1075				149.952	96.9243	141.536	91.4843					250.192	163.692	39.2987	25.7119				53.3329	36.8328	55.9518	38.6415				137.38	87.274	87.1075	55.3373
	85.0525	98.0909		168.427	173.064		131.173	100.073		309.753	107.891				85.0525	54.9751	98.0909	63.4027					168.427	110.196	173.064	113.23				131.173	90.5906	100.073	69.1121				309.753	196.778	107.891	68.5404
	182.695	44.8812		57.2748	273.229		133.286	155.845		129.332	153.516				182.695	118.088	44.8812	29.0097					57.2748	37.473	273.229	178.765				133.286	92.0498	155.845	107.63				129.332	82.1615	153.516	97.525
	206.632	77.2523		230.402	416.018		255.189	81.7114		157.463	235.717				206.632	133.56	77.2523	49.9333					230.402	150.744	416.018	272.187				255.189	176.239	81.7114	56.4316				157.463	100.033	235.717	149.745
	107.275	106.799		435.397	187.586		81.0082	109.176		70.1959	360.82				107.275	69.339	106.799	69.0313					435.397	284.866	187.586	122.732				81.0082	55.9459	109.176	75.399				70.1959	44.5938	360.82	229.22
	82.8975	169.639		60.9866	228.095		374.815	96.7893		241.535	272.047				82.8975	53.5822	169.639	109.649					60.9866	39.9015	228.095	149.235				374.815	258.855	96.7893	66.8447				241.535	153.442	272.047	172.825
	95.88	87.8178		88.3616	68.0418		104.06	116.505		63.5161	346.824				95.88	61.9736	87.8178	56.7625					88.3616	57.8121	68.0418	44.5175				104.06	71.8659	116.505	80.461				63.5161	40.3503	346.824	220.329
	168.56	79.5867		60.0736	236.334		52.1399	30.6225		39.9348	399.084				168.56	108.951	79.5867	51.4422					60.0736	39.3042	236.334	154.625				52.1399	36.0089	30.6225	21.1485				39.9348	25.3696	399.084	253.529
	120.897	156.186		36.4102	820.776		335.279	112.447		84.7404	350.17				120.897	78.1441	156.186	100.953					36.4102	23.822	820.776	537.007				335.279	231.55	112.447	77.6583				84.7404	53.8335	350.17	222.455
	392.502	150.582		196.024	539.656		111.234	204.15		194.02	108.118				392.502	253.7	150.582	97.3309					196.024	128.252	539.656	353.079				111.234	76.8205	204.15	140.99				194.02	123.256	108.118	68.6846
	282.275	62.3867		92.77	63.7504		112.905	108.539		165.284	93.4662				282.275	182.453	62.3867	40.3247					92.77	60.6963	63.7504	41.7098				112.905	77.9742	108.539	74.959				165.284	105.001	93.4662	59.3768
	190.782	98.7206		197.459	77.1418		95.6411	102.914		275.736	118.22				190.782	123.315	98.7206	63.8097					197.459	129.191	77.1418	50.4713				95.6411	66.0517	102.914	71.0742				275.736	175.168	118.22	75.1021
	382.345	66.9792		74.704	166.893		140.335	41.3615		686.676	68.7441				382.345	247.135	66.9792	43.2931					74.704	48.8764	166.893	109.192				140.335	96.9183	41.3615	28.5651				686.676	436.229	68.7441	43.6715
	251.632	262.178		115.028	247.943		65.7164	144.664		115.411	105.105				251.632	162.647	262.178	169.463					115.028	75.2589	247.943	162.221				65.7164	45.3851	144.664	99.9078				115.411	73.318	105.105	66.7709
	64.3625	139.602		152.451	136.017		104.843	80.5633		96.8652	51.2187				64.3625	41.6018	139.602	90.2343					152.451	99.7437	136.017	88.9917				104.843	72.407	80.5633	55.6386				96.8652	61.5361	51.2187	32.538
	71.4	402.463		45.473	60.0079		87.5352	108.332		103.621	144.114				71.4	46.1506	402.463	260.139					45.473	29.7515	60.0079	39.2612				87.5352	60.4536	108.332	74.8161				103.621	65.8277	144.114	91.552
	88.1724	95.2031		30.248	325.864		210.001	178.918		142.673	140.25				88.1724	56.9917	95.2031	61.5361					30.248	19.7903	325.864	213.202				210.001	145.031	178.918	123.565				142.673	90.6368	140.25	89.0977
	72.8724	74.2117		146.956	201.548		150.236	75.3115		75.4896	304.072				72.8724	47.1023	74.2117	47.968					146.956	96.1482	201.548	131.867				150.236	103.756	75.3115	52.0116				75.4896	47.9567	304.072	193.17
	58.4175	288.208		109.358	24.7655		175.003	63.0746		723.573	205.121				58.4175	37.7591	288.208	186.288					109.358	71.5495	24.7655	16.2032				175.003	120.861	63.0746	43.5606				723.573	459.668	205.121	130.309
	112.417	97.34		96.0612	86.8127		71.38	71.8333		54.9204	35.2437				112.417	72.6629	97.34	62.9173					96.0612	62.8497	86.8127	56.7987				71.38	49.2964	71.8333	49.6095				54.9204	34.8896	35.2437	22.3895
	251.832	236.302		228.342	124.538		183.876	49.4946		86.7634	211.846				251.832	162.776	236.302	152.738					228.342	149.397	124.538	81.4808				183.876	126.989	49.4946	34.182				86.7634	55.1187	211.846	134.58
	87.9975	50.6697		108.98	70.4595		66.307	69.5604		223.72	77.9507				87.9975	56.8787	50.6697	32.7512					108.98	71.3021	70.4595	46.0993				66.307	45.793	69.5604	48.0398				223.72	142.124	77.9507	49.5202
	90.985	585.284		138.169	372.118		302.968	457.356		57.5987	123.79				90.985	58.8097	585.284	378.308					138.169	90.3993	372.118	243.464				302.968	209.236	457.356	315.859				57.5987	36.591	123.79	78.6408
	273.282	135.837		67.7732	47.8656		34.7235	119.014		68.6584	99.3393				273.282	176.641	135.837	87.8005					67.7732	44.3418	47.8656	31.3169				34.7235	23.9808	119.014	82.1932				68.6584	43.617	99.3393	63.1079
	32.845	77.8819		124.349	54.5211		121.135	15.5043		188.361	106.309				32.845	21.2299	77.8819	50.3403					124.349	81.3577	54.5211	35.6714				121.135	83.6584	15.5043	10.7076				188.361	119.661	106.309	67.5355
	192.66	116.627		53.8392	86.5919		188.443	384.886		114.605	282.256				192.66	124.529	116.627	75.3837					53.8392	35.2252	86.5919	56.6542				188.443	130.143	384.886	265.81				114.605	72.8057	282.256	179.31
	95.7349	155.066		208.535	261.124		332.439	272.257		141.412	186.562				95.7349	61.8799	155.066	100.229					208.535	136.437	261.124	170.845				332.439	229.589	272.257	188.026				141.412	89.8359	186.562	118.518
	127.76	110.838		170.445	185.793		96.2035	301.649		72.9184	381.648				127.76	82.5797	110.838	71.6421					170.445	111.516	185.793	121.558				96.2035	66.44	301.649	208.325				72.9184	46.3233	381.648	242.451
	46.7749	58.4556		113.779	99.9943		60.0812	172.656		100.684	32.1557				46.7749	30.2338	58.4556	37.7838					113.779	74.4418	99.9943	65.423				60.0812	41.4933	172.656	119.24				100.684	63.9622	32.1557	20.4277
	93.52	269.767		74.0074	323.537		33.2694	49.0929		67.0009	115.528				93.52	60.4482	269.767	174.368					74.0074	48.4206	323.537	211.68				33.2694	22.9765	49.0929	33.9045				67.0009	42.5641	115.528	73.3924
	99.96	108.688		67.8752	65.7533		181.832	126.194		34.2757	248.831				99.96	64.6108	108.688	70.2524					67.8752	44.4085	65.7533	43.0202				181.832	125.577	126.194	87.1518				34.2757	21.7745	248.831	158.076
	55.6349	181.432		111.49	213.184		135.302	52.3358		197.215	115.755				55.6349	35.9606	181.432	117.272					111.49	72.9444	213.184	139.48				135.302	93.4425	52.3358	36.1441				197.215	125.286	115.755	73.5366
	205.177	110.959		96.7876	78.6495		301.008	203.696		88.7107	65.9146				205.177	132.62	110.959	71.7204					96.7876	63.325	78.6495	51.4578				301.008	207.882	203.696	140.677				88.7107	56.3558	65.9146	41.874
	29.64	63.3854		260.822	180.592		374.622	482.064		90.9478	107.28				29.64	19.1583	63.3854	40.9702					260.822	170.647	180.592	118.155				374.622	258.722	482.064	332.923				90.9478	57.7769	107.28	68.1523
	139.155	58.3476		63.0166	230.631		95.0788	93.9483		117.252	161.488				139.155	89.9451	58.3476	37.7139					63.0166	41.2297	230.631	150.894				95.0788	65.6633	93.9483	64.8826				117.252	74.4871	161.488	102.589
	229.175	110.438		63.539	39.6109		195.328	67.454		403.139	408.581				229.175	148.131	110.438	71.3832					63.539	41.5715	39.6109	25.9161				195.328	134.898	67.454	46.5851				403.139	256.104	408.581	259.561
	375.367	16.5622		379.53	88.6327		372.73	85.6201		85.7741	179.883				375.367	242.625	16.5622	10.7053					379.53	248.314	88.6327	57.9895				372.73	257.415	85.6201	59.1309				85.7741	54.4902	179.883	114.275
	132.22	33.7622		225.747	93.2473		87.8364	74.8811		64.6882	840.117				132.22	85.4626	33.7622	21.8228					225.747	147.699	93.2473	61.0087				87.8364	60.6616	74.8811	51.7144				64.6882	41.0948	840.117	533.706
	174.957	79.4023		172.199	98.1364		125.003	66.1796		364.994	366.466				174.957	113.087	79.4023	51.323					172.199	112.664	98.1364	64.2074				125.003	86.3299	66.1796	45.705				364.994	231.872	366.466	232.807
	100.382	86.0367		108.794	104.857		481.961	144.635		116.187	594.812				100.382	64.8839	86.0367	55.6113					108.794	71.1801	104.857	68.6042				481.961	332.852	144.635	99.8881				116.187	73.8106	594.812	377.87
	128.532	97.2319		201.982	174.9		97.3	33.8368		293.11	405.26				128.532	83.0791	97.2319	62.8475					201.982	132.15	174.9	114.431				97.3	67.1973	33.8368	23.3684				293.11	186.205	405.26	257.452
	72.8724	90.3051		174.721	89.3219		123.987	158.537		72.3702	186.531				72.8724	47.1023	90.3051	58.3702					174.721	114.314	89.3219	58.4404				123.987	85.6279	158.537	109.489				72.3702	45.9751	186.531	118.499
	62.5275	143.839		92.9018	115.087		64.1941	151.345		67.5178	85.1917				62.5275	40.4157	143.839	92.9728					92.9018	60.7826	115.087	75.2979				64.1941	44.3337	151.345	104.522				67.5178	42.8924	85.1917	54.1202
	73.8924	458.993		182.943	168.126		42.0059	147.907		45.2598	62.1271				73.8924	47.7616	458.993	296.678					182.943	119.694	168.126	109.999				42.0059	29.0101	147.907	102.147				45.2598	28.7525	62.1271	39.4678
	540.457	115.107		105.935	173.43		85.2176	85.7579		87.0219	465.462				540.457	349.334	115.107	74.401					105.935	69.3098	173.43	113.469				85.2176	58.853	85.7579	59.2261				87.0219	55.2829	465.462	295.696
	190.3	122.186		96.902	34.9695		84.4222	153.394		102.115	113.077				190.3	123.003	122.186	78.9771					96.902	63.3998	34.9695	22.8794				84.4222	58.3037	153.394	105.937				102.115	64.8709	113.077	71.8353
	62.6424	279.932		161.166	632.841		120.408	595.314		41.0754	317.293				62.6424	40.49	279.932	180.939					161.166	105.445	632.841	414.047				120.408	83.1563	595.314	411.136				41.0754	26.0942	317.293	201.569
	107.07	114.477		207.826	73.9433		59.8199	128.547		330.977	670.988				107.07	69.2064	114.477	73.994					207.826	135.973	73.9433	48.3787				59.8199	41.3129	128.547	88.7773				330.977	210.262	670.988	426.262
	107.565	92.9319		65.7432	348.77		154.145	137.18		227.369	183.367				107.565	69.5264	92.9319	60.0681					65.7432	43.0136	348.77	228.189				154.145	106.455	137.18	94.7391				227.369	144.442	183.367	116.489
	232.905	224.401		344.539	110.069		39.8929	100.669		139.1	128.718				232.905	150.542	224.401	145.045					344.539	225.421	110.069	72.0145				39.8929	27.5509	100.669	69.5243				139.1	88.3667	128.718	81.7715
	140.277	72.8442		93.5088	36.0624		72.9306	146.231		50.4778	167.424				140.277	90.6707	72.8442	47.0841					93.5088	61.1797	36.0624	23.5944				72.9306	50.3673	146.231	100.99				50.4778	32.0673	167.424	106.36
	359.222	99.0895		512.898	374.923		136.262	258.843		226.229	414.694				359.222	232.189	99.0895	64.0482					512.898	335.572	374.923	245.3				136.262	94.1054	258.843	178.762				226.229	143.718	414.694	263.445
	102.917	81.1518		134.703	103.661		112.399	85.6486		46.2934	65.215				102.917	66.5224	81.1518	52.4538					134.703	88.132	103.661	67.8221				112.399	77.6248	85.6486	59.1506				46.2934	29.4091	65.215	41.4295
	118.785	141.307		101.485	213.664		78.2929	68.3954		14.0407	510.393				118.785	76.7786	141.307	91.3361					101.485	66.398	213.664	139.793				78.2929	54.0707	68.3954	47.2352				14.0407	8.91973	510.393	324.24
	42.9425	69.2819		147.52	35.2171		701.864	172.14		333.611	154.367				42.9425	27.7566	69.2819	44.7816					147.52	96.5176	35.2171	23.0414				701.864	484.722	172.14	118.883				333.611	211.935	154.367	98.0656
	154.31	127.453		43.0946	514.778		118.596	35.9433		204.198	59.6317				154.31	99.7408	127.453	82.3815					43.0946	28.1954	514.778	336.802				118.596	81.905	35.9433	24.8231				204.198	129.722	59.6317	37.8825
	104.825	69.0976		78.5898	322.616		90.6764	65.9158		187.448	237.009				104.825	67.7553	69.0976	44.6624					78.5898	51.4187	322.616	211.077				90.6764	62.623	65.9158	45.5228				187.448	119.081	237.009	150.566
	87.3699	113.771		67.8452	278.78		103.418	140.313		167.168	281.36				87.3699	56.473	113.771	73.5375					67.8452	44.3889	278.78	182.397				103.418	71.4223	140.313	96.9032				167.168	106.198	281.36	178.741
	122.152	44.1434		121.076	204.408		149.425	200.964		74.2419	83.7611				122.152	78.9553	44.1434	28.5328					121.076	79.2158	204.408	133.737				149.425	103.196	200.964	138.79				74.2419	47.1641	83.7611	53.2114
	185.797	49.9637		68.2956	92.8973		390.504	401.985		209.63	426.213				185.797	120.093	49.9637	32.2949					68.2956	44.6836	92.8973	60.7796				390.504	269.69	401.985	277.619				209.63	133.173	426.213	270.763
	22.5725	150.595		151.958	180.215		96.7376	202.6		75.8237	190.747				22.5725	14.5901	150.595	97.3393					151.958	99.4214	180.215	117.909				96.7376	66.8089	202.6	139.92				75.8237	48.169	190.747	121.177
	87.1224	53.8184		228.27	173.118		175.634	75.3804		176.205	421.173				87.1224	56.3131	53.8184	34.7864					228.27	149.349	173.118	113.265				175.634	121.296	75.3804	52.0592				176.205	111.939	421.173	267.561
	76.8499	127.975		121.623	273.019		57.1047	138.609		124.297	282.898				76.8499	49.6732	127.975	82.7187					121.623	79.5738	273.019	178.627				57.1047	39.4376	138.609	95.7259				124.297	78.9628	282.898	179.718
	107.202	96.0042		86.68	290.492		172.657	59.1258		193.276	80.6419				107.202	69.2921	96.0042	62.0539					86.68	56.7119	290.492	190.059				172.657	119.241	59.1258	40.8334				193.276	122.784	80.6419	51.2298
	95.1074	122.892		179.202	179.902		122.601	44.2025		108.322	70.0989				95.1074	61.4743	122.892	79.4335					179.202	117.246	179.902	117.704				122.601	84.6708	44.2025	30.5271				108.322	68.8143	70.0989	44.5321
	109.315	269.595		77.3708	113.8		302.406	42.4978		131.052	198.29				109.315	70.6576	269.595	174.258					77.3708	50.6212	113.8	74.4559				302.406	208.847	42.4978	29.3499				131.052	83.2543	198.29	125.969
	663.172	71.0631		258.528	152.435		382.478	446.84		167.03	487.252				663.172	428.652	71.0631	45.9328					258.528	169.147	152.435	99.7334				382.478	264.147	446.84	308.597				167.03	106.11	487.252	309.54
	174.927	85.1462		59.0586	72.3442		189.937	217.053		106.009	68.9582				174.927	113.067	85.1462	55.0356					59.0586	38.6401	72.3442	47.3324				189.937	131.175	217.053	149.901				106.009	67.345	68.9582	43.8075
	321.79	230.685		481.709	203.223		276.486	171.434		240.345	274.681				321.79	207.994	230.685	149.107					481.709	315.166	203.223	132.962				276.486	190.947	171.434	118.396				240.345	152.685	274.681	174.498
	103.298	19.0812		62.5961	292.468		125.77	109.302		196.743	99.1123				103.298	66.7681	19.0812	12.3334					62.5961	40.9546	292.468	191.352				125.77	86.8596	109.302	75.486				196.743	124.986	99.1123	62.9636
	55.78	462.402		60.392	143.244		131.559	191.569		331.267	392.146				55.78	36.0543	462.402	298.882					60.392	39.5125	143.244	93.7197				131.559	90.8572	191.569	132.301				331.267	210.446	392.146	249.121
	159.235	290.376		71.2386	105.74		89.4835	279.047		168.888	145.91				159.235	102.924	290.376	187.69					71.2386	46.6091	105.74	69.1821				89.4835	61.7991	279.047	192.715				168.888	107.291	145.91	92.6929
	140.772	170.421		127.773	159.597		99.6176	69.5318		105.461	160.013				140.772	90.9906	170.421	110.155					127.773	83.5974	159.597	104.419				99.6176	68.7979	69.5318	48.0201				105.461	66.9968	160.013	101.652
	57.0474	298.958		42.8484	432.668		118.693	50.0225		248.108	49.0573				57.0474	36.8736	298.958	193.236					42.8484	28.0343	432.668	283.081				118.693	81.9716	50.0225	34.5466				248.108	157.617	49.0573	31.1649
	152.197	95.9409		135.442	105.325		59.6835	515.641		333.971	102.534				152.197	98.3754	95.9409	62.013					135.442	88.6154	105.325	68.9107				59.6835	41.2186	515.641	356.112				333.971	212.164	102.534	65.1376
	87.5025	136.944		104.457	36.7516		131.667	218.218		135.022	258.233				87.5025	56.5587	136.944	88.5159					104.457	68.343	36.7516	24.0454				131.667	90.9319	218.218	150.705				135.022	85.7765	258.233	164.049
	97.7449	139.125		459.409	70.3033		119.187	393.06		730.644	107.784				97.7449	63.1791	139.125	89.926					459.409	300.576	70.3033	45.9972				119.187	82.3129	393.06	271.455				730.644	464.16	107.784	68.4724
	174.112	211.1		124.553	276.556		20.4883	1319.09		141.305	365.767				174.112	112.54	211.1	136.448					124.553	81.4912	276.556	180.942				20.4883	14.1496	1319.09	910.987				141.305	89.7679	365.767	232.363
	108.79	496.631		387.361	747.809		143.187	122.647		95.1764	81.0073				108.79	70.3182	496.631	321.006					387.361	253.438	747.809	489.267				143.187	98.8878	122.647	84.7021				95.1764	60.4632	81.0073	51.462
	97.9624	58.5319		132.733	93.0266		152.333	234.318		41.6237	68.8825				97.9624	63.3196	58.5319	37.8331					132.733	86.8429	93.0266	60.8642				152.333	105.204	234.318	161.824				41.6237	26.4425	68.8825	43.7594
	119.515	166.891		38.368	917.312		81.0082	156.637		162.94	477.787				119.515	77.2505	166.891	107.873					38.368	25.1029	917.312	600.167				81.0082	55.9459	156.637	108.177				162.94	103.512	477.787	303.527
	97.6724	198.187		56.0856	78.8056		115.745	74.1465		69.2823	566.984				97.6724	63.1322	198.187	128.102					56.0856	36.695	78.8056	51.5599				115.745	79.9356	74.1465	51.2071				69.2823	44.0133	566.984	360.191
	186.117	108.243		186.901	159.247		313.54	105.795		55.1032	78.8146				186.117	120.3	108.243	69.9646					186.901	122.283	159.247	104.19				313.54	216.537	105.795	73.0642				55.1032	35.0057	78.8146	50.069
	96.1999	102.13		125.25	227.379		124.481	68.0626		56.8678	416.534				96.1999	62.1804	102.13	66.0135					125.25	81.9469	227.379	148.766				124.481	85.9692	68.0626	47.0054				56.8678	36.1267	416.534	264.614
	46.0325	92.9003		215.844	236.856		255.587	98.7697		146.63	324.294				46.0325	29.7539	92.9003	60.0477					215.844	141.219	236.856	154.967				255.587	176.513	98.7697	68.2123				146.63	93.1508	324.294	206.016
	92.4699	136.346		70.3976	526.878		149.276	185.765		186.628	393.149				92.4699	59.7695	136.346	88.1293					70.3976	46.0589	526.878	344.719				149.276	103.093	185.765	128.293				186.628	118.56	393.149	249.758
	234.595	81.0753		79.1122	115.777		94.7094	72.0401		157.57	97.2407				234.595	151.634	81.0753	52.4044					79.1122	51.7605	115.777	75.7488				94.7094	65.4082	72.0401	49.7523				157.57	100.101	97.2407	61.7747
	384.752	212.531		232.954	292.571		71.6811	58.6265		188.393	59.5246				384.752	248.691	212.531	137.373					232.954	152.414	292.571	191.419				71.6811	49.5044	58.6265	40.4886				188.393	119.681	59.5246	37.8145
	128.737	107.613		176.535	507.493		132.394	99.3665		86.505	111.785				128.737	83.2116	107.613	69.5575					176.535	115.501	507.493	332.036				132.394	91.434	99.3665	68.6245				86.505	54.9545	111.785	71.0144
	189.6	103.498		150.811	323.263		155.57	551.595		156.884	125.857				189.6	122.551	103.498	66.8974					150.811	98.671	323.263	211.5				155.57	107.44	551.595	380.943				156.884	99.6644	125.857	79.9541
	106.677	81.5523		457.871	111.291		106.241	74.2843		76.6617	108.149				106.677	68.9528	81.5523	52.7127					457.871	299.57	111.291	72.8142				106.241	73.3723	74.2843	51.3023				76.6617	48.7013	108.149	68.7045
	80.3324	249.17		51.6052	115.997		85.547	111.477		79.1571	471.713				80.3324	51.9242	249.17	161.055					51.6052	33.7636	115.997	75.8933				85.547	59.0805	111.477	76.9884				79.1571	50.2866	471.713	299.668
	77.3025	329.732		86.5356	160.781		154.57	158.52		333.151	251.843				77.3025	49.9658	329.732	213.128					86.5356	56.6174	160.781	105.194				154.57	106.749	158.52	109.477				333.151	211.643	251.843	159.99
	81.9075	50.5934		253.963	205.032		58.1329	84.1508		278.382	820.341				81.9075	52.9423	50.5934	32.7019					253.963	166.16	205.032	134.146				58.1329	40.1478	84.1508	58.1162				278.382	176.85	820.341	521.143
	48.9899	80.9226		73.659	124.134		131.008	266.408		272.282	273.401				48.9899	31.6655	80.9226	52.3057					73.659	48.1927	124.134	81.2167				131.008	90.4769	266.408	183.987				272.282	172.974	273.401	173.685
	59.5099	82.7354		456.406	92.3373		60.9846	95.9572		100.608	109.504				59.5099	38.4652	82.7354	53.4774					456.406	298.611	92.3373	60.4133				60.9846	42.1172	95.9572	66.2699				100.608	63.9141	109.504	69.5652
	235.47	138.464		107.575	418.603		79.2929	460.972		42.1404	502.554				235.47	152.2	138.464	89.4985					107.575	70.3825	418.603	273.878				79.2929	54.7612	460.972	318.356				42.1404	26.7708	502.554	319.26
	306.635	170.053		233.213	746.926		198.538	107.901		138.993	275.607				306.635	198.198	170.053	109.916					233.213	152.584	746.926	488.689				198.538	137.114	107.901	74.5189				138.993	88.2988	275.607	175.087
	248.217	82.0739		180.811	123.277		118.392	115.093		45.3354	210.749				248.217	160.439	82.0739	53.0499					180.811	118.299	123.277	80.6563				118.392	81.7637	115.093	79.4858				45.3354	28.8005	210.749	133.884
	89.12	122.326		84.5056	66.8195		94.8458	105.255		226.411	98.4258				89.12	57.6042	122.326	79.0674					84.5056	55.2893	66.8195	43.7178				94.8458	65.5024	105.255	72.6915				226.411	143.834	98.4258	62.5275
	84.165	203.715		173.982	500.827		90.2788	580.103		89.0004	124.868				84.165	54.4014	203.715	131.675					173.982	113.831	500.827	327.674				90.2788	62.3484	580.103	400.631				89.0004	56.5398	124.868	79.3256
	179.677	101.163		374.425	234.346		140.375	139.785		121.726	95.3378				179.677	116.137	101.163	65.3885					374.425	244.974	234.346	153.325				140.375	96.9459	139.785	96.5386				121.726	77.3294	95.3378	60.5658
	160.502	84.4848		183.538	287.552		111.37	678.19		63.1507	30.3598				160.502	103.743	84.4848	54.6082					183.538	120.083	287.552	188.136				111.37	76.9147	678.19	468.371				63.1507	40.1181	30.3598	19.2869
	72.4499	303.735		62.524	62.6464		81.3376	141.656		195.192	485.563				72.4499	46.8292	303.735	196.324					62.524	40.9074	62.6464	40.9875				81.3376	56.1734	141.656	97.8308				195.192	124.001	485.563	308.467
	122.587	80.1848		130.86	99.0196		50.4529	359.512		90.658	68.5928				122.587	79.2364	80.1848	51.8288					130.86	85.6173	99.0196	64.7853				50.4529	34.8438	359.512	248.286				90.658	57.5928	68.5928	43.5753
	169.332	113.478		479.246	143.244		99.0552	555.986		64.3984	300.133				169.332	109.451	113.478	73.3485					479.246	313.555	143.244	93.7197				99.0552	68.4095	555.986	383.975				64.3984	40.9107	300.133	190.668
	139.505	124.61		95.917	225.973		128.815	158.422		59.0734	83.5028				139.505	90.1713	124.61	80.5439					95.917	62.7553	225.973	147.847				128.815	88.9624	158.422	109.41				59.0734	37.5279	83.5028	53.0473
	154.135	240.494		414.142	126.605		72.5729	59.2233		76.1134	89.1175				154.135	99.6277	240.494	155.447					414.142	270.959	126.605	82.8336				72.5729	50.1203	59.2233	40.9008				76.1134	48.353	89.1175	56.6142
	142.45	65.6117		581.582	94.938		86.4788	125.402		70.2717	87.1075				142.45	92.0749	65.6117	42.4092					581.582	380.51	94.938	62.1148				86.4788	59.724	125.402	86.6051				70.2717	44.6419	87.1075	55.3373
	203.385	83.1806		73.9054	191.603		131.735	108.636		372.632	85.3117				203.385	131.461	83.1806	53.7652					73.9054	48.3539	191.603	125.36				131.735	90.979	108.636	75.0263				372.632	236.724	85.3117	54.1964
	253.395	145.207		166.529	43.4985		104.98	284.258		169.846	59.1148				253.395	163.786	145.207	93.8567					166.529	108.954	43.4985	28.4597				104.98	72.5013	284.258	196.315				169.846	107.899	59.1148	37.5542
	120.475	102.652		190.601	104.921		111.973	52.3072		181.908	157.41				120.475	77.871	102.652	66.3507					190.601	124.704	104.921	68.6465				111.973	77.3307	52.3072	36.1244				181.908	115.562	157.41	99.9991
	78.6124	498.304		201.982	46.7348		97.9704	610.834		78.6846	359.844				78.6124	50.8124	498.304	322.087					201.982	132.15	46.7348	30.577				97.9704	67.6604	610.834	421.854				78.6846	49.9864	359.844	228.6
	46.7749	224.585		239.189	176.095		88.2622	59.4586		217.053	53.1346				46.7749	30.2338	224.585	145.164					239.189	156.493	176.095	115.213				88.2622	60.9557	59.4586	41.0633				217.053	137.889	53.1346	33.7551
	111.47	156.523		115.707	167.189		135.109	61.8004		69.0996	272.355				111.47	72.0505	156.523	101.171					115.707	75.7033	167.189	109.386				135.109	93.3092	61.8004	42.6806				69.0996	43.8973	272.355	173.02
	65.28	100.381		71.455	45.6955		84.587	82.4746		138.003	266.236				65.28	42.1948	100.381	64.8827					71.455	46.7506	45.6955	29.897				84.587	58.4175	82.4746	56.9586				138.003	87.6702	266.236	169.133
	150.375	127.161		98.049	81.8211		509.312	202.945		127.612	141.618				150.375	97.1973	127.161	82.1925					98.049	64.1502	81.8211	53.5329				509.312	351.741	202.945	140.158				127.612	81.0687	141.618	89.9666
	161.45	87.8178		96.1932	172.886		95.7093	105.864		566.76	352.968				161.45	104.356	87.8178	56.7625					96.1932	62.936	172.886	113.114				95.7093	66.0988	105.864	73.1118				566.76	360.049	352.968	224.232
	192.557	111.805		129.064	82.3273		61.1094	171.503		85.333	310.948				192.557	124.463	111.805	72.2671					129.064	84.4421	82.3273	53.8641				61.1094	42.2034	171.503	118.443				85.333	54.21	310.948	197.538
	249.882	92.5631		264.3	146.948		50.714	160.046		98.0817	140.175				249.882	161.516	92.5631	59.8297					264.3	172.923	146.948	96.1435				50.714	35.0241	160.046	110.531				98.0817	62.3089	140.175	89.0497
	68.02	71.3556		394.971	100.802		186.001	358.226		89.0761	165.842				68.02	43.9659	71.3556	46.1219					394.971	258.417	100.802	65.9513				186.001	128.456	358.226	247.398				89.0761	56.5879	165.842	105.355
	288.365	52.1137		170.895	302.527		148.192	185.387		69.5721	94.8653				288.365	186.389	52.1137	33.6845					170.895	111.811	302.527	197.934				148.192	102.344	185.387	128.032				69.5721	44.1974	94.8653	60.2656
	55.0074	24.1637		250.702	571.312		234.62	95.2914		200.99	78.1021				55.0074	35.555	24.1637	15.6186					250.702	164.026	571.312	373.79				234.62	162.033	95.2914	65.8102				200.99	127.684	78.1021	49.6163
	73.615	152.884		143.46	143.373		199.003	109.135		233.577	134.894				73.615	47.5823	152.884	98.8193					143.46	93.8613	143.373	93.8043				199.003	137.436	109.135	75.3711				233.577	148.386	134.894	85.695
	115.652	136.944		86.0132	60.3848		93.034	319.58		80.1907	83.32				115.652	74.7539	136.944	88.5159					86.0132	56.2756	60.3848	39.5078				93.034	64.2512	319.58	220.708				80.1907	50.9432	83.32	52.9312
	85.2999	137.974		129.484	127.58		82.667	109.744		213.832	383.292				85.2999	55.135	137.974	89.1818					129.484	84.7172	127.58	83.4713				82.667	57.0915	109.744	75.7914				213.832	135.843	383.292	243.496
	67.1449	102.791		80.488	59.1358		33.3376	174.373		92.8193	370.481				67.1449	43.4003	102.791	66.441					80.488	52.6606	59.1358	38.6906				33.3376	23.0236	174.373	120.425				92.8193	58.9658	370.481	235.357
	90.4299	83.8867		116.001	224.74		175.498	67.9936		87.0219	109.031				90.4299	58.4509	83.8867	54.2216					116.001	75.8954	224.74	147.04				175.498	121.202	67.9936	46.9578				87.0219	55.2829	109.031	69.265
	72.6674	80.4009		108.488	35.594		179.446	164.271		122.425	404.378				72.6674	46.9698	80.4009	51.9685					108.488	70.9798	35.594	23.288				179.446	123.929	164.271	113.449				122.425	77.7738	404.378	256.892
	61.2	178.748		77.9232	70.6156		226.883	63.1033		181.53	341.196				61.2	39.5576	178.748	115.537					77.9232	50.9826	70.6156	46.2015				226.883	156.69	63.1033	43.5804				181.53	115.322	341.196	216.754
	84.3099	136.161		98.962	70.7071		76.1399	1090.97		149.536	465.6				84.3099	54.4951	136.161	88.01					98.962	64.7476	70.7071	46.2613				76.1399	52.5838	1090.97	753.449				149.536	94.9964	465.6	295.784
	101.33	242.599		159.844	326.359		116.472	107.735		150.418	70.7984				101.33	65.4963	242.599	156.808					159.844	104.581	326.359	213.526				116.472	80.4377	107.735	74.404				150.418	95.5569	70.7984	44.9765
	175.247	552.557		113.376	106.768		78.6223	296.283		38.4287	150.504				175.247	113.274	552.557	357.155					113.376	74.1782	106.768	69.8548				78.6223	54.2981	296.283	204.619				38.4287	24.4128	150.504	95.6114
	66.825	203.683		50.3738	121.355		380.399	211.675		94.7352	73.0354				66.825	43.1934	203.683	131.654					50.3738	32.9579	121.355	79.3985				380.399	262.711	211.675	146.187				94.7352	60.183	73.0354	46.3976
	86.205	108.765		214	82.5482		50.3564	146.036		95.5105	239.126				86.205	55.72	108.765	70.3018					214	140.013	82.5482	54.0086				50.3564	34.7772	146.036	100.855				95.5105	60.6755	239.126	151.911
	108.12	207.214		194.558	169.542		262.773	51.3658		80.8902	189.77				108.12	69.8852	207.214	133.936					194.558	127.293	169.542	110.926				262.773	181.476	51.3658	35.4742				80.8902	51.3876	189.77	120.556
	90.8099	406.147		196.384	58.344		88.2622	343.521		82.6104	607.592				90.8099	58.6965	406.147	262.52					196.384	128.488	58.344	38.1726				88.2622	60.9557	343.521	237.242				82.6104	52.4804	607.592	385.988
	141.297	174.708		198.907	80.3133		183.876	66.8168		124.007	264.182				141.297	91.3299	174.708	112.926					198.907	130.138	80.3133	52.5464				183.876	126.989	66.8168	46.145				124.007	78.7787	264.182	167.828
	250.667	268.062		173.388	108.965		60.4506	241.01		406.984	358.28				250.667	162.023	268.062	173.266					173.388	113.442	108.965	71.2922				60.4506	41.7484	241.01	166.446				406.984	258.547	358.28	227.607
	387.957	131.83		159.976	99.5527		73.3964	777.308		85.4843	731.14				387.957	250.763	131.83	85.2102					159.976	104.667	99.5527	65.1341				73.3964	50.6891	777.308	536.825				85.4843	54.3061	731.14	464.475
	294.835	97.7985		119.971	63.6479		64.5917	470.408		208.382	124.093				294.835	190.571	97.7985	63.2137					119.971	78.4931	63.6479	41.6427				64.5917	44.6083	470.408	324.873				208.382	132.38	124.093	78.8331
	107.915	107.028		65.4968	250.57		115.54	139.303		52.7148	461.598				107.915	69.7526	107.028	69.1794					65.4968	42.8524	250.57	163.94				115.54	79.7942	139.303	96.2054				52.7148	33.4884	461.598	293.242
	85.7524	265.836		116.65	58.7588		347.923	92.1746		86.5493	169.995				85.7524	55.4275	265.836	171.827					116.65	76.3201	58.7588	38.4439				347.923	240.283	92.1746	63.6577				86.5493	54.9827	169.995	107.994
	301.77	74.2881		87.4786	681.056		104.281	59.3611		99.4364	248.465				301.77	195.054	74.2881	48.0174					87.4786	57.2344	681.056	445.592				104.281	72.0186	59.3611	40.996				99.4364	63.1695	248.465	157.844
	164.232	124.89		41.2388	47.1764		71.2835	143.39		347.5	730.641				164.232	106.154	124.89	80.7245					41.2388	26.9812	47.1764	30.866				71.2835	49.2298	143.39	99.0278				347.5	220.759	730.641	464.159
	352.505	231.003		115.797	95.509		39.9212	46.6133		149.17	538.915				352.505	227.847	231.003	149.313					115.797	75.7619	95.509	62.4884				39.9212	27.5704	46.6133	32.1921				149.17	94.7642	538.915	342.36
	83.115	76.0245		42.0076	289.114		156.133	225.186		186.931	91.2919				83.115	53.7228	76.0245	49.1397					42.0076	27.4842	289.114	189.158				156.133	107.828	225.186	155.518				186.931	118.753	91.2919	57.9955
	68.2974	474.451		84.2594	425.054		109.053	139.774		492.398	77.4469				68.2974	44.1452	474.451	306.669					84.2594	55.1282	425.054	278.099				109.053	75.3141	139.774	96.5305				492.398	312.808	77.4469	49.2001
	105.06	130.417		71.2386	37.414		485.347	69.7672		49.8852	60.1798				105.06	67.9073	130.417	84.2974					71.2386	46.6091	37.414	24.4788				485.347	335.19	69.7672	48.1826				49.8852	31.6909	60.1798	38.2308
	104.637	178.131		27.3772	183.542		73.9588	245.361		44.0878	193.741				104.637	67.6342	178.131	115.138					27.3772	17.912	183.542	120.086				73.9588	51.0774	245.361	169.451				44.0878	28.0079	193.741	123.079
	71.8224	147.725		124.061	637.909		194.38	155.764		171.749	179.366				71.8224	46.4236	147.725	95.4848					124.061	81.1689	637.909	417.363				194.38	134.243	155.764	107.574				171.749	109.108	179.366	113.947
	58.9124	106.983		131.454	77.0503		82.2011	150.18		94.4455	69.5821				58.9124	38.079	106.983	69.1505					131.454	86.0063	77.0503	50.4115				82.2011	56.7697	150.18	103.717				94.4455	59.9989	69.5821	44.2038
	93.345	53.8947		285.645	88.5413		145.641	38.7558		121.619	206.4				93.345	60.3351	53.8947	34.8358					285.645	186.888	88.5413	57.9296				145.641	100.583	38.7558	26.7655				121.619	77.2614	206.4	131.121
	163.955	162.636		177.346	78.4666		39.0976	69.8243		94.9493	332.172				163.955	105.975	162.636	105.122					177.346	116.032	78.4666	51.3381				39.0976	27.0016	69.8243	48.2221				94.9493	60.319	332.172	211.021
	68.34	324.834		145.244	53.9502		105.02	254.119		106.677	798.297				68.34	44.1727	324.834	209.962					145.244	95.0283	53.9502	35.2978				105.02	72.5289	254.119	175.5				106.677	67.7695	798.297	507.139
	295.517	111.621		40.2238	233.943		509.624	76.5168		121.953	139.047				295.517	191.013	111.621	72.1479					40.2238	26.3171	233.943	153.061				509.624	351.957	76.5168	52.844				121.953	77.4737	139.047	88.3333
	148.612	116.182		125.046	57.1864		124.248	58.0868		421.698	67.0867				148.612	96.0581	116.182	75.0959					125.046	81.8135	57.1864	37.4152				124.248	85.8083	58.0868	40.1159				421.698	267.894	67.0867	42.6185
	65.9499	135.748		216.438	781.06		91.3353	170.854		34.9752	87.5043				65.9499	42.6278	135.748	87.7427					216.438	141.608	781.06	511.022				91.3353	63.078	170.854	117.995				34.9752	22.2189	87.5043	55.5894
	72.1	526.776		87.899	318.062		401.911	336.736		101.78	658.493				72.1	46.603	526.776	340.49					87.899	57.5094	318.062	208.097				401.911	277.568	336.736	232.557				101.78	64.6586	658.493	418.324
	217.55	127.345		90.2175	276.023		127.526	81.2004		113.477	190.867				217.55	140.617	127.345	82.3116					90.2175	59.0264	276.023	180.593				127.526	88.0719	81.2004	56.0786				113.477	72.0893	190.867	121.253
	43.045	120.144		286.936	62.6464		139.387	67.5229		62.4511	305.383				43.045	27.8228	120.144	77.6572					286.936	187.733	62.6464	40.9875				139.387	96.2634	67.5229	46.6327				62.4511	39.6737	305.383	194.002
	228.432	363.566		218.162	272.486		113.523	184.474		162.864	53.1346				228.432	147.651	363.566	234.997					218.162	142.736	272.486	178.279				113.523	78.4016	184.474	127.402				162.864	103.463	53.1346	33.7551
	114.56	225.584		103.965	756.947		664.951	90.4414		84.9989	112.989				114.56	74.0477	225.584	145.81					103.965	68.0208	756.947	495.246				664.951	459.229	90.4414	62.4607				84.9989	53.9977	112.989	71.779
	48.2475	408.157		526.759	1096.47		183.286	265.134		68.0346	227.348				48.2475	31.1856	408.157	263.819					526.759	344.641	1096.47	717.382				183.286	126.581	265.134	183.107				68.0346	43.2207	227.348	144.429
	57.82	138.909		75.9952	248.32		141.307	48.955		240.042	179.655				57.82	37.3729	138.909	89.7863					75.9952	49.7211	248.32	162.467				141.307	97.5894	48.955	33.8093				240.042	152.493	179.655	114.131
	61.405	104.312		118.289	273.019		74.2882	124.46		109.355	180.204				61.405	39.6901	104.312	67.4236					118.289	77.3927	273.019	178.627				74.2882	51.3049	124.46	85.9549				109.355	69.4709	180.204	114.479
	71.08	450.317		245.699	242.003		135.479	69.4343		117.069	619.244				71.08	45.9437	450.317	291.07					245.699	160.753	242.003	158.335				135.479	93.5643	69.4343	47.9528				117.069	74.371	619.244	393.391
	78.6425	93.1928		69.0344	48.4902		86.1776	425.167		104.944	244.388				78.6425	50.8319	93.1928	60.2368					69.0344	45.1669	48.4902	31.7255				86.1776	59.516	425.167	293.629				104.944	66.6684	244.388	155.254
	212.97	175.014		82.62	149.861		90.7446	347.693		76.4032	514.3				212.97	137.657	175.014	113.123					82.62	54.0555	149.861	98.0494				90.7446	62.6701	347.693	240.124				76.4032	48.5371	514.3	326.722
	111.295	245.608		49.7494	41.054		93.8576	160.35		123.049	69.475				111.295	71.9373	245.608	158.753					49.7494	32.5494	41.054	26.8603				93.8576	64.8199	160.35	110.741				123.049	78.1701	69.475	44.1358
	102.887	142.872		109.082	28.9118		105.02	288.828		116.369	86.515				102.887	66.503	142.872	92.3477					109.082	71.3688	28.9118	18.916				105.02	72.5289	288.828	199.47				116.369	73.9266	86.515	54.9609
	56.2025	134.946		91.4366	75.0742		122.163	296.174		91.9814	57.76				56.2025	36.3274	134.946	87.2249					91.4366	59.8239	75.0742	49.1186				122.163	84.3686	296.174	204.544				91.9814	58.4335	57.76	36.6935
	50.0825	65.7962		226.703	56.1203		517.111	77.1254		365.303	257.382				50.0825	32.3716	65.7962	42.5284					226.703	148.324	56.1203	36.7177				517.111	357.128	77.1254	53.2643				365.303	232.068	257.382	163.509
	381.795	77.2523		346.022	63.8687		180.269	147.144		166.317	38.7284				381.795	246.779	77.2523	49.9333					346.022	226.391	63.8687	41.7872				180.269	124.498	147.144	101.62				166.317	105.657	38.7284	24.6032
	154.527	89.2617		157.989	50.5042		56.9399	495.656		91.7673	361.734				154.527	99.8814	89.2617	57.6958					157.989	103.367	50.5042	33.0432				56.9399	39.3239	495.656	342.31				91.7673	58.2975	361.734	229.801
	123.565	95.4956		162.571	798.742		122.095	63.9758		189.016	375.258				123.565	79.8683	95.4956	61.7252					162.571	106.365	798.742	522.591				122.095	84.3214	63.9758	44.183				189.016	120.078	375.258	238.392
	83.4649	255.252		97.743	136.303		135.603	255.199		120.34	152.728				83.4649	53.949	255.252	164.986					97.743	63.95	136.303	89.1785				135.603	93.6505	255.199	176.245				120.34	76.4489	152.728	97.0242
	101.65	121.143		129.238	135.991		537.528	102.219		99.8019	107.708				101.65	65.7031	121.143	78.3027					129.238	84.5561	135.991	88.9742				537.528	371.227	102.219	70.5948				99.8019	63.4017	107.708	68.4243
	34.6374	182.03		339.945	88.762		110.876	178.792		131.645	227.852				34.6374	22.3885	182.03	117.658					339.945	222.415	88.762	58.0741				110.876	76.5735	178.792	123.478				131.645	83.6308	227.852	144.749
	70.6575	86.0367		142.853	331.712		182.45	258.689		86.8078	444.117				70.6575	45.6707	86.0367	55.6113					142.853	93.4642	331.712	217.028				182.45	126.004	258.689	178.656				86.8078	55.1469	444.117	282.137
	110.13	579.019		74.7761	135.495		261.58	165.298		475.981	98.4128				110.13	71.1843	579.019	374.258					74.7761	48.9236	135.495	88.6502				261.58	180.652	165.298	114.158				475.981	302.379	98.4128	62.5192
	146.15	57.2278		73.587	173.247		40.4553	181.163		13.5996	170.008				146.15	94.4665	57.2278	36.9901					73.587	48.1455	173.247	113.35				40.4553	27.9392	181.163	125.115				13.5996	8.63949	170.008	108.002
	61.1574	273.482		158.685	150.836		108.036	17.7772		185.122	150.9				61.1574	39.5301	273.482	176.77					158.685	103.823	150.836	98.6871				108.036	74.6121	17.7772	12.2773				185.122	117.603	150.9	95.8634
	90.4724	91.9334		47.9956	202.507		143.34	154.766		292.423	102.093				90.4724	58.4784	91.9334	59.4227					47.9956	31.4019	202.507	132.494				143.34	98.9934	154.766	106.884				292.423	185.769	102.093	64.8573
	151.105	93.6381		112.127	247.463		179.241	149.761		73.4667	517.798				151.105	97.6692	93.6381	60.5246					112.127	73.361	247.463	161.907				179.241	123.787	149.761	103.428				73.4667	46.6716	517.798	328.944
	246.587	113.281		118.433	46.6702		118.227	301.633		67.8832	646.021				246.587	159.386	113.281	73.2208					118.433	77.4871	46.6702	30.5348				118.227	81.65	301.633	208.314				67.8832	43.1245	646.021	410.401
	179.78	77.1759		76.8061	131.311		191.801	195.615		151.332	127.729				179.78	116.204	77.1759	49.8839					76.8061	50.2517	131.311	85.9127				191.801	132.462	195.615	135.096				151.332	96.1373	127.729	81.1431
	72.1724	185.58		199.838	142.517		108.723	42.8996		337.443	88.538				72.1724	46.6498	185.58	119.952					199.838	130.747	142.517	93.244				108.723	75.0866	42.8996	29.6273				337.443	214.369	88.538	56.246
	746.51	133.013		356.593	586.173		155.9	415.26		642.192	91.9157				746.51	482.519	133.013	85.9749					356.593	233.307	586.173	383.514				155.9	107.668	415.26	286.787				642.192	407.969	91.9157	58.3918
	97.2499	65.1664		123.568	134.106		98.3281	319.426		95.1764	445.882				97.2499	62.8591	65.1664	42.1214					123.568	80.8466	134.106	87.7411				98.3281	67.9074	319.426	220.602				95.1764	60.4632	445.882	283.258
	243.702	152.363		93.2924	261.555		178.787	606.289		321.392	125.599				243.702	157.521	152.363	98.4821					93.2924	61.0381	261.555	171.127				178.787	123.474	606.289	418.715				321.392	204.173	125.599	79.7899
	325.2	201.533		97.2504	343.622		85.9729	78.6636		420.904	156.484				325.2	210.198	201.533	130.264					97.2504	63.6277	343.622	224.821				85.9729	59.3746	78.6636	54.3267				420.904	267.39	156.484	99.4104
	319.08	126.747		126.121	235.256		37.1776	85.6201		73.0698	302.156				319.08	206.243	126.747	81.9251					126.121	82.5166	235.256	153.921				37.1776	25.6756	85.6201	59.1309				73.0698	46.4195	302.156	191.953
	224.745	87.7861		412.515	294.638		148.959	176.146		124.738	332.065				224.745	145.268	87.7861	56.742					412.515	269.895	294.638	192.772				148.959	102.874	176.146	121.65				124.738	79.243	332.065	210.953
	173.732	175.58		102.5	176.381		293.147	249.545		213.19	230.329				173.732	112.295	175.58	113.489					102.5	67.0621	176.381	115.4				293.147	202.453	249.545	172.341				213.19	135.435	230.329	146.322
	120.65	93.2692		221.555	99.8382		121.505	106.363		60.2454	57.9428				120.65	77.9841	93.2692	60.2861					221.555	144.956	99.8382	65.3209				121.505	83.9136	106.363	73.4566				60.2454	38.2725	57.9428	36.8096
	73.0175	138.019		199.892	117.855		55.9799	153.434		102.083	136.218				73.0175	47.1961	138.019	89.2107					199.892	130.783	117.855	77.1088				55.9799	38.6609	153.434	105.965				102.083	64.851	136.218	86.5357
	73.935	268.642		101.977	106.585		406.973	78.5946		97.6719	122.101				73.935	47.7891	268.642	173.641					101.977	66.7202	106.585	69.7351				406.973	281.063	78.5946	54.279				97.6719	62.0486	122.101	77.5679
	140.422	134.902		156.12	171.179		131.462	370.21		273.801	155.312				140.422	90.7643	134.902	87.196					156.12	102.144	171.179	111.997				131.462	90.7905	370.21	255.675				273.801	173.939	155.312	98.6659
														mean		100		98.5627						100		142.571					100		134.273					100		140.741

## Sheet: Figure 10C
	randomly selected data values											normalyzed values
	KO EGFP Ctrl	KO EGFP Sema3E		KO C4 Ctrl	KO C4 Sema3E		KO C4 D103 Ctrl	KO C4 D103 Sema3E				KO EGFP Ctrl	%	KO EGFP Sema3E	%				KO C4 Ctrl	%	KO C4 Sema3E	%				KO C4 D103 Ctrl	%	KO C4 D103 Sema3E	%
culture 1	57.8701	55.6985	culture 1	89.6985	146.782	culture 1	84.8406	42.3848		mean KO EFGP ctrl	72.7173	57.8701	79.5823	55.6985	76.596		mean KO C4 ctrl	65.8715	89.6985	136.172	146.782	201.853		mean KO C4-D103ctrl	59.3469	84.8406	142.957	42.3848	71.4187
	63.9706	199.066		43.8701	89.4264		37.2132	52.3848		mean normalized KO EGFP ctrl	100	63.9706	87.9717	199.066	273.753		mean normalized KO C4 ctrl	100	43.8701	66.5995	89.4264	122.978		mean normalized KO C4-D103 ctrl	100	37.2132	62.7045	52.3848	88.2688
	63.7696	112.77		82.0122	167.995		38.3848	66.6985		mean normalized KO EGFP sema3E	100.166	63.7696	87.6952	112.77	155.079		mean normalized KOC4sema3E	122.887	82.0122	124.503	167.995	231.025		mean normalized KO C4-D103 sema3E	117.001	38.3848	64.6787	66.6985	112.387
	37.1421	38.5563		66.2843	47.799		24.6569	64.1127				37.1421	51.0774	38.5563	53.0222				66.2843	100.627	47.799	65.7327				24.6569	41.5471	64.1127	108.03
	85.3259	352.392		28.3848	55.3553		138.368	70.598				85.3259	117.339	352.392	484.605				28.3848	43.0912	55.3553	76.124				138.368	233.15	70.598	118.958
	99.4975	16.2426		47.6274	106.498		19.7279	47.3848				99.4975	136.828	16.2426	22.3366				47.6274	72.3035	106.498	146.454				19.7279	33.2417	47.3848	79.8437
	94.8406	48.2132		77.2548	37.8701		120.012	37.3848				94.8406	130.424	48.2132	66.3023				77.2548	117.281	37.8701	52.0785				120.012	202.221	37.3848	62.9937
	175.782	26.2426		57.4558	36.1421		70.6274	34.6274				175.782	241.733	26.2426	36.0885				57.4558	87.224	36.1421	49.7022				70.6274	119.008	34.6274	58.3474
	16.3137	102.87		21.4853	64.7696		26.3137	27.8995				16.3137	22.4344	102.87	141.466				21.4853	32.617	64.7696	89.0704				26.3137	44.3388	27.8995	47.0109
	30.5563	28.9706		50.799	93.598		21.3137	79.1127				30.5563	42.0207	28.9706	39.84				50.799	77.1183	93.598	128.715				21.3137	35.9137	79.1127	133.305
	88.0122	76.1838		39.5563	179.024		36.2843	92.598				88.0122	121.033	76.1838	104.767				39.5563	60.0507	179.024	246.192				36.2843	61.1393	92.598	156.028
	58.799	616.637		30.0711	132.054		43.3848	97.8406				58.799	80.8597	616.637	847.992				30.0711	45.6511	132.054	181.599				43.3848	73.1037	97.8406	164.862
	144.912	159.681		28.7279	117.368		226.995	29.3137				144.912	199.281	159.681	219.592				28.7279	43.612	117.368	161.402				226.995	382.488	29.3137	49.3938
	87.598	38.6274		23.3137	35.9706		27.4853	43.2132				87.598	120.464	38.6274	53.12				23.3137	35.3927	35.9706	49.4664				27.4853	46.3129	43.2132	72.8145
	95.397	39.799		235.167	30.5563		55.0416	36.5563				95.397	131.189	39.799	54.7311				235.167	357.008	30.5563	42.0207				55.0416	92.7455	36.5563	61.5976
	84.8406	60.5269		32.7279	45.4558		236.108	57.4558				84.8406	116.672	60.5269	83.2359				32.7279	49.6844	45.4558	62.5103				236.108	397.843	57.4558	96.8134
	119.953	60.4558		53.2843	30.6569		54.2132	19.3137				119.953	164.958	60.4558	83.1381				53.2843	80.8913	30.6569	42.159				54.2132	91.3496	19.3137	32.5437
	87.4264	24.2132		173.995	111.054		25.1421	22.1421				87.4264	120.228	24.2132	33.2977				173.995	264.143	111.054	152.72				25.1421	42.3646	22.1421	37.3096
	98.0833	104.983		135.539	46.2132		26.5563	18.4853				98.0833	134.883	104.983	144.371				135.539	205.763	46.2132	63.5519				26.5563	44.7476	18.4853	31.1479
	47.4558	36.3137		98.4975	160.255		19.7279	26.8995				47.4558	65.2607	36.3137	49.9382				98.4975	149.53	160.255	220.381				19.7279	33.2417	26.8995	45.3258
	44.0416	38.9706		26.7279	72.3553		49.4558	55.1127				44.0416	60.5655	38.9706	53.5919				26.7279	40.5758	72.3553	99.5022				49.4558	83.3334	55.1127	92.8653
	18.2426	79.1838		22.5563	62.7696		36.7279	17.8995				18.2426	25.087	79.1838	108.893				22.5563	34.2429	62.7696	86.3201				36.7279	61.8868	17.8995	30.1608
	19.4853	139.711		40.799	117.74		23.7279	49.799				19.4853	26.796	139.711	192.129				40.799	61.9372	117.74	161.915				23.7279	39.9817	49.799	83.9117
	92.2548	54.5269		37.3848	203.995		32.9706	48.8701				92.2548	126.868	54.5269	74.9848				37.3848	56.7541	203.995	280.532				32.9706	55.5557	48.8701	82.3465
	24.8995	39.5563		84.7401	213.167		24.7279	88.1127				24.8995	34.2415	39.5563	54.3974				84.7401	128.645	213.167	293.144				24.7279	41.6667	88.1127	148.471
	57.8701	25.0711		26.2132	61.1838		24.6569	95.0833				57.8701	79.5823	25.0711	34.4775				26.2132	39.7944	61.1838	84.1393				24.6569	41.5471	95.0833	160.216
	139.782	63.2132		45.0416	114.397		56.9411	39.1127				139.782	192.226	63.2132	86.9301				45.0416	68.378	114.397	157.317				56.9411	95.9462	39.1127	65.9052
	97.8406	69.5563		46.3137	64.6985		123.64	52.799				97.8406	134.549	69.5563	95.653				46.3137	70.3091	64.6985	88.9727				123.64	208.334	52.799	88.9667
	32.8995	22.8995		122.811	159.853		26.8995	189.823				32.8995	45.243	22.8995	31.4911				122.811	186.441	159.853	219.828				26.8995	45.3258	189.823	319.854
	63.6985	39.6274		77.4264	59.7279		24.3848	32.8995				63.6985	87.5975	39.6274	54.4952				77.4264	117.542	59.7279	82.1371				24.3848	41.0886	32.8995	55.4359
	99.0833	15.4853		68.4264	47.3137		238.037	70.2843				99.0833	136.258	15.4853	21.2952				68.4264	103.879	47.3137	65.0653				238.037	401.093	70.2843	118.43
	70.1838	46.799		32.3137	188.154		121.811	28.7279				70.1838	96.516	46.799	64.3575				32.3137	49.0556	188.154	258.748				121.811	205.253	28.7279	48.4067
	26.8995	24.8995		87.8823	388.463		42.7279	46.6274				26.8995	36.9919	24.8995	34.2415				87.8823	133.415	388.463	534.21				42.7279	71.9968	46.6274	78.5675
	98.5685	16.0711		26.3848	86.669		158.368	76.3259				98.5685	135.55	16.0711	22.1008				26.3848	40.0549	86.669	119.186				158.368	266.85	76.3259	128.61
	57.5269	43.1421		45.1127	46.3848		29.799	120.64				57.5269	79.1104	43.1421	59.3285				45.1127	68.4859	46.3848	63.7879				29.799	50.2115	120.64	203.279
	143.64	104.841		86.9117	28.7279		20.9706	57.3553				143.64	197.532	104.841	144.176				86.9117	131.941	28.7279	39.5063				20.9706	35.3356	57.3553	96.6441
	33.1421	42.799		51.1127	55.4264		55.598	30.0711				33.1421	45.5766	42.799	58.8567				51.1127	77.5945	55.4264	76.2218				55.598	93.683	30.0711	50.67
	56.4558	41.8995		28.8995	217.823		18.4853	37.5563				56.4558	77.6374	41.8995	57.6197				28.8995	43.8725	217.823	299.548				18.4853	31.1479	37.5563	63.2826
	163.095	36.3137		80.2548	80.8406		55.2843	27.799				163.095	224.287	36.3137	49.9382				80.2548	121.835	80.8406	111.171				55.2843	93.1544	27.799	46.8415
	202.095	104.154		82.4264	31.7279		26.8995	32.1421				202.095	277.919	104.154	143.232				82.4264	125.132	31.7279	43.6319				26.8995	45.3258	32.1421	54.1597
	130.125	71.1127		155.539	41.4558		46.2843	49.5269				130.125	178.946	71.1127	97.7934				155.539	236.125	41.4558	57.0096				46.2843	77.9894	49.5269	83.4532
	100.326	35.7279		23.7279	108.296		81.669	40.799				100.326	137.967	35.7279	49.1326				23.7279	36.0215	108.296	148.928				81.669	137.613	40.799	68.7466
	41.1421	50.2843		39.6985	103.225		34.5563	41.799				41.1421	56.5782	50.2843	69.1504				39.6985	60.2666	103.225	141.954				34.5563	58.2276	41.799	70.4316
	92.1543	62.9411		14.4853	145.853		41.4853	45.5269				92.1543	126.73	62.9411	86.5559				14.4853	21.9902	145.853	200.575				41.4853	69.903	45.5269	76.7131
	105.326	79.3553		60.2843	36.9706		70.598	115.598				105.326	144.843	79.3553	109.129				60.2843	91.518	36.9706	50.8416				70.598	118.958	115.598	194.783
	46.1127	46.3848		47.3848	148.024		42.3848	25.7279				46.1127	63.4137	46.3848	63.7879				47.3848	71.9352	148.024	203.562				42.3848	71.4187	25.7279	43.3517
	119.811	45.5563		32.1421	233.965		33.2132	70.799				119.811	164.763	45.5563	62.6485				32.1421	48.7951	233.965	321.747				33.2132	55.9645	70.799	119.297
	69.6985	49.1421		34.2132	132.297		62.0416	29.0711				69.6985	95.8486	49.1421	67.5797				34.2132	51.9393	132.297	181.933				62.0416	104.541	29.0711	48.985
	50.2132	66.4264		63.4558	63.9411		25.2132	94.598				50.2132	69.0526	66.4264	91.3488				63.4558	96.3327	63.9411	87.9311				25.2132	42.4844	94.598	159.398
	58.8701	32.4853		225.551	22.5563		17.4853	79.0416				58.8701	80.9575	32.4853	44.6734				225.551	342.411	22.5563	31.0192				17.4853	29.4629	79.0416	133.186
	63.6274	33.3137		23.3137	39.7279		113.255	29.3848				63.6274	87.4997	33.3137	45.8126				23.3137	35.3927	39.7279	54.6334				113.255	190.835	29.3848	49.5136
	54.9411	77.598		42.799	146.468		23.8995	32.1421				54.9411	75.5544	77.598	106.712				42.799	64.9735	146.468	201.421				23.8995	40.2708	32.1421	54.1597
	100.77	75.1127		34.7279	105.669		36.6274	43.2132				100.77	138.577	75.1127	103.294				34.7279	52.7207	105.669	145.315				36.6274	61.7174	43.2132	72.8145
	43.2132	59.7696		42.0416	32.0711		15.2426	40.799				43.2132	59.4263	59.7696	82.1945				42.0416	63.8236	32.0711	44.1038				15.2426	25.6839	40.799	68.7466
	47.0416	26.8995		34.6569	125.083		19.0711	16.2426				47.0416	64.6911	26.8995	36.9919				34.6569	52.6129	125.083	172.013				19.0711	32.1349	16.2426	27.3689
	78.1127	46.2132		43.7279	27.3848		17.4853	50.9706				78.1127	107.42	46.2132	63.5519				43.7279	66.3836	27.3848	37.6593				17.4853	29.4629	50.9706	85.8858
	45.5269	24.1421		22.6569	109.569		16.3137	66.2843				45.5269	62.6081	24.1421	33.1999				22.6569	34.3956	109.569	150.677				16.3137	27.4887	66.2843	111.69
	137.569	140.882		38.7279	123.74		41.3137	20.4853				137.569	189.183	140.882	193.74				38.7279	58.7931	123.74	170.166				41.3137	69.6139	20.4853	34.5179
	87.4975	49.6985		53.5269	29.3137		18.0711	22.4853				87.4975	120.326	49.6985	68.3448				53.5269	81.2596	29.3137	40.3119				18.0711	30.4499	22.4853	37.8879
	30.3137	55.0416		43.9706	220.167		33.2132	100.326				30.3137	41.6871	55.0416	75.6926				43.9706	66.7521	220.167	302.771				33.2132	55.9645	100.326	169.05
	83.669	38.1127		52.9706	123.225		29.7279	35.8995				83.669	115.061	38.1127	52.4122				52.9706	80.415	123.225	169.458				29.7279	50.0917	35.8995	60.4909
	22.8995	76.8406		20.8995	216.752		79.0122	34.3848				22.8995	31.4911	76.8406	105.67				20.8995	31.7277	216.752	298.075				79.0122	133.136	34.3848	57.9386
	67.9411	44.2132		56.598	60.6985		68.9411	45.5563				67.9411	93.4318	44.2132	60.8015				56.598	85.9218	60.6985	83.4719				68.9411	116.166	45.5563	76.7627
	18.0711	50.4264		44.799	30.5563		81.598	35.8995				18.0711	24.8512	50.4264	69.3458				44.799	68.0097	30.5563	42.0207				81.598	137.493	35.8995	60.4909
	75.6985	38.799		33.3137	135.054		39.5563	37.3137				75.6985	104.1	38.799	53.356				33.3137	50.5738	135.054	185.724				39.5563	66.6526	37.3137	62.8738
	39.3848	39.3137		190.924	55.4558		79.5269	37.5563				39.3848	54.1615	39.3137	54.0638				190.924	289.843	55.4558	76.2622				79.5269	134.003	37.5563	63.2826
	66.2843	157.083		116.64	129.841		22.2426	128.569				66.2843	91.1534	157.083	216.019				116.64	177.071	129.841	178.555				22.2426	37.4789	128.569	216.639
	23.4853	60.6985		51.598	152.125		26.4853	96.8406				23.4853	32.2967	60.6985	83.4719				51.598	78.3313	152.125	209.2				26.4853	44.6279	96.8406	163.177
	57.6985	70.598		36.2132	48.0416		49.3553	115.296				57.6985	79.3463	70.598	97.0856				36.2132	54.9755	48.0416	66.0663				49.3553	83.164	115.296	194.275
	52.6274	39.9706		42.8701	91.2548		28.1421	53.1127				52.6274	72.3726	39.9706	54.9671				42.8701	65.0814	91.2548	125.493				28.1421	47.4196	53.1127	89.4953
	122.225	50.3848		49.8701	75.8701		43.5563	89.2548				122.225	168.083	50.3848	69.2886				49.8701	75.7081	75.8701	104.336				43.5563	73.3927	89.2548	150.395
	67.6274	47.2132		31.3137	156.054		135.225	47.3553				67.6274	93.0004	47.2132	64.9271				31.3137	47.5375	156.054	214.603				135.225	227.856	47.3553	79.794
	93.3259	88.5685		22.8995	117.326		55.2843	21.7279				93.3259	128.341	88.5685	121.798				22.8995	34.7639	117.326	161.345				55.2843	93.1544	21.7279	36.6117
	125.853	28.8995		34.9706	74.3259		68.6274	30.8995				125.853	173.071	28.8995	39.7423				34.9706	53.0891	74.3259	102.212				68.6274	115.638	30.8995	52.0659
	75.8406	26.8995		54.6985	148.953		44.6985	59.3848				75.8406	104.295	26.8995	36.9919				54.6985	83.0382	148.953	204.839				44.6985	75.3173	59.3848	100.064
	58.6985	35.8701		44.6985	80.6985		38.3137	43.6985				58.6985	80.7215	35.8701	49.3282				44.6985	67.8571	80.6985	110.976				38.3137	64.5589	43.6985	73.6323
	63.4558	66.8701		59.3553	82.4558		11.4142	153.125				63.4558	87.2637	66.8701	91.959				59.3553	90.1077	82.4558	113.392				11.4142	19.233	153.125	258.017
	38.4853	39.3137		20.4853	241.149		82.7401	17.3137				38.4853	52.9246	39.3137	54.0638				20.4853	31.0989	241.149	331.626				82.7401	139.418	17.3137	29.1737
	67.7696	62.3848		49.9411	250.865		55.8701	60.0416				67.7696	93.196	62.3848	85.7909				49.9411	75.8159	250.865	344.987				55.8701	94.1415	60.0416	101.171
	60.0122	54.6274		91.5269	186.054		140.569	106.77				60.0122	82.5281	54.6274	75.123				91.5269	138.948	186.054	255.859				140.569	236.859	106.77	179.908
	60.1838	41.1421		37.5563	274.208		25.3137	24.8995				60.1838	82.7641	41.1421	56.5782				37.5563	57.0145	274.208	377.088				25.3137	42.6538	24.8995	41.9558
	89.397	21.1421		43.2843	53.2132		48.4558	58.6274				89.397	122.938	21.1421	29.0744				43.2843	65.7102	53.2132	73.1782				48.4558	81.6484	58.6274	98.7876
	118.669	28.6569		37.7279	34.0711		26.799	123.669				118.669	163.192	28.6569	39.4086				37.7279	57.275	34.0711	46.8542				26.799	45.1565	123.669	208.383
	21.7279	36.0416		96.598	68.4558		86.8406	51.2843				21.7279	29.88	36.0416	49.564				96.598	146.646	68.4558	94.1397				86.8406	146.327	51.2843	86.4144
	27.1421	70.1838		71.8406	65.8701		29.0711	29.6569				27.1421	37.3255	70.1838	96.516				71.8406	109.062	65.8701	90.5838				29.0711	48.985	29.6569	49.9721
	34.3848	64.6985		52.0416	47.3848		90.4975	38.8701				34.3848	47.2856	64.6985	88.9727				52.0416	79.0047	47.3848	65.163				90.4975	152.489	38.8701	65.4964
	64.0122	64.9706		57.7279	53.5563		23.4853	66.7696				64.0122	88.0289	64.9706	89.3468				57.7279	87.6371	53.5563	73.65				23.4853	39.5729	66.7696	112.507
	33.3137	55.3848		117.125	36.1127		37.5563	32.5563				33.3137	45.8126	55.3848	76.1646				117.125	177.808	36.1127	49.6618				37.5563	63.2826	32.5563	54.8576
	21.3137	210.48		40.3137	129.125		111.983	31.799				21.3137	29.3104	210.48	289.45				40.3137	61.2005	129.125	177.571				111.983	188.692	31.799	53.5815
	72.9411	55.4264		48.7696	34.2426		33.5563	59.5269				72.9411	100.308	55.4264	76.2218				48.7696	74.0375	34.2426	47.09				33.5563	56.5426	59.5269	100.303
	48.4558	395.848		26.8995	81.6985		71.4264	109.669				48.4558	66.6359	395.848	544.365				26.8995	40.8363	81.6985	112.351				71.4264	120.354	109.669	184.793
	25.1421	77.7696		22.5563	138.64		58.2132	71.5269				25.1421	34.5751	77.7696	106.948				22.5563	34.2429	138.64	190.656				58.2132	98.0897	71.5269	120.523
	82.6985	99.1838		54.0416	83.2548		69.0122	69.4264				82.6985	113.726	99.1838	136.396				54.0416	82.0409	83.2548	114.491				69.0122	116.286	69.4264	116.984
	66.4264	27.799		25.5563	91.5269		18.7279	27.3137				66.4264	91.3488	27.799	38.2289				25.5563	38.7972	91.5269	125.867				18.7279	31.5566	27.3137	46.0238
	54.7279	51.7279		120.782	66.598		166.125	121.498				54.7279	75.2612	51.7279	71.1356				120.782	183.36	66.598	91.5848				166.125	279.922	121.498	204.724
	83.2843	60.8701		34.799	126.569		19.0711	160.125				83.2843	114.532	60.8701	83.7079				34.799	52.8286	126.569	174.056				19.0711	32.1349	160.125	269.812
	54.5269	29.0416		121.012	27.6569		22.8995	30.5563				54.5269	74.9848	29.0416	39.9377				121.012	183.709	27.6569	38.0335				22.8995	38.5858	30.5563	51.4876
	39.3848	38.3848		29.3137	40.4558		21.8995	68.669				39.3848	54.1615	38.3848	52.7863				29.3137	44.5013	40.4558	55.6344				21.8995	36.9008	68.669	115.708
	47.3137	57.4558		49.2132	57.6985		52.6985	20.8995				47.3137	65.0653	57.4558	79.0126				49.2132	74.7109	57.6985	79.3463				52.6985	88.7973	20.8995	35.2158
	77.1838	68.1838		63.8701	44.1127		107.841	36.6985				77.1838	106.142	68.1838	93.7656				63.8701	96.9616	44.1127	60.6633				107.841	181.712	36.6985	61.8372
	51.4264	33.9706		29.8995	81.5269		33.4853	28.8995				51.4264	70.721	33.9706	46.716				29.8995	45.3906	81.5269	112.115				33.4853	56.423	28.8995	48.6959
	28.4142	42.0416		87.4975	46.7279		30.8284	32.6274				28.4142	39.0749	42.0416	57.8151				87.4975	132.831	46.7279	64.2597				30.8284	51.9461	32.6274	54.9774
	47.6985	51.1127		14.0711	115.255		26.7279	86.7696				47.6985	65.5944	51.1127	70.2896				14.0711	21.3614	115.255	158.497				26.7279	45.0367	86.7696	146.207
	75.4264	86.1838		46.3848	25.7279		31.0711	62.2843				75.4264	103.726	86.1838	118.519				46.3848	70.4171	25.7279	35.3807				31.0711	52.355	62.2843	104.949
	115.77	60.2132		77.1838	119.74		29.799	45.6985				115.77	159.205	60.2132	82.8045				77.1838	117.173	119.74	164.665				29.799	50.2115	45.6985	77.0023
	31.799	62.6985		29.2132	79.2132		85.0833	52.799				31.799	43.7296	62.6985	86.2223				29.2132	44.3488	79.2132	108.933				85.0833	143.366	52.799	88.9667
	55.0711	53.6274		58.2132	91.8406		37.4558	167.095				55.0711	75.7332	53.6274	73.7478				58.2132	88.3739	91.8406	126.298				37.4558	63.1133	167.095	281.557
	86.9411	94.8406		33.4558	38.1421		119.841	55.6274				86.9411	119.56	94.8406	130.424				33.4558	50.7895	38.1421	52.4526				119.841	201.932	55.6274	93.7326
	18.2426	56.799		135.811	72.8701		159.125	93.1838				18.2426	25.087	56.799	78.1094				135.811	206.176	72.8701	100.21				159.125	268.127	93.1838	157.015
	25.6569	29.8995		20.7279	94.598		34.9706	33.5563				25.6569	35.2831	29.8995	41.1175				20.7279	31.4672	94.598	130.09				34.9706	58.9257	33.5563	56.5426
	23.6569	68.2843		39.2132	95.0833		19.8284	17.6569				23.6569	32.5327	68.2843	93.9038				39.2132	59.5298	95.0833	130.757				19.8284	33.411	17.6569	29.752
	23.2426	25.8995		36.1421	56.3848		20.8995	35.1421				23.2426	31.963	25.8995	35.6167				36.1421	54.8676	56.3848	77.5397				20.8995	35.2158	35.1421	59.2147
	46.799	12.4853		38.9706	64.3848		39.3848	30.3137				46.799	64.3575	12.4853	17.1696				38.9706	59.1615	64.3848	88.5413				39.3848	66.3637	30.3137	51.0788
	151.569	33.0711		99.8406	118.397		31.6569	66.4558				151.569	208.435	33.0711	45.479				99.8406	151.569	118.397	162.818				31.6569	53.3421	66.4558	111.978
	27.2426	17.4853		47.4558	147.51		88.9117	54.3553				27.2426	37.4637	17.4853	24.0456				47.4558	72.043	147.51	202.854				88.9117	149.817	54.3553	91.5891
	16.4853	41.1421		12.0711	79.4264		30.7279	28.9706				16.4853	22.6704	41.1421	56.5782				12.0711	18.3252	79.4264	109.226				30.7279	51.7767	28.9706	48.8157
	57.2843	21.2426		98.0833	141.154		102.498	19.6569				57.2843	78.7767	21.2426	29.2126				98.0833	148.901	141.154	194.114				102.498	172.709	19.6569	33.122
	218.279	57.8701		39.7279	119.225		26.1421	72.8701				218.279	300.175	57.8701	79.5823				39.7279	60.3112	119.225	163.957				26.1421	44.0496	72.8701	122.787
	261.208	68.799		101.983	143.539		108.113	22.7279				261.208	359.211	68.799	94.6116				101.983	154.821	143.539	197.393				108.113	182.171	22.7279	38.2967
	31.799	48.3137		62.4558	117.498		18.1421	130.225				31.799	43.7296	48.3137	66.4405				62.4558	94.8146	117.498	161.581				18.1421	30.5696	130.225	219.431
	37.1421	25.8284		43.2132	53.2132		25.9706	86.9411				37.1421	51.0774	25.8284	35.5189				43.2132	65.6023	53.2132	73.1782				25.9706	43.7606	86.9411	146.496
	83.2548	76.3259		111.012	82.2548		120.154	28.3137				83.2548	114.491	76.3259	104.963				111.012	168.528	82.2548	113.116				120.154	202.461	28.3137	47.7088
	45.2132	68.2843		47.4558	47.799		59.4558	57.1127				45.2132	62.1767	68.2843	93.9038				47.4558	72.043	47.799	65.7327				59.4558	100.183	57.1127	96.2353
	75.1838	52.6985		142.468	100.841		48.799	27.3137				75.1838	103.392	52.6985	72.4704				142.468	216.282	100.841	138.675				48.799	82.2267	27.3137	46.0238
	91.1838	44.3848		65.1127	82.397		20.6569	32.3137				91.1838	125.395	44.3848	61.0375				65.1127	98.848	82.397	113.311				20.6569	34.807	32.3137	54.4488
	43.0416	83.669		102.811	77.9411		37.8701	255.836				43.0416	59.1903	83.669	115.061				102.811	156.078	77.9411	107.184				37.8701	63.8114	255.836	431.085
	31.3137	27.7279		132.154	115.64		17.8284	31.4853				31.3137	43.0623	27.7279	38.1311				132.154	200.624	115.64	159.026				17.8284	30.041	31.4853	53.053
	43.8995	46.0416		57.1127	171.095		104.154	90.9411				43.8995	60.3701	46.0416	63.3159				57.1127	86.7032	171.095	235.289				104.154	175.501	90.9411	153.236
	65.9706	33.4558		35.4853	59.669		113.326	48.4558				65.9706	90.722	33.4558	46.008				35.4853	53.8705	59.669	82.0561				113.326	190.955	48.4558	81.6484
	125.569	43.7279		54.1127	34.3848		29.0711	41.0416				125.569	172.68	43.7279	60.1341				54.1127	82.1489	34.3848	47.2856				29.0711	48.985	41.0416	69.1554
	48.2843	35.3848		43.6985	60.799		68.9706	58.7696				48.2843	66.4	35.3848	48.6608				43.6985	66.339	60.799	83.6101				68.9706	116.216	58.7696	99.0272
	65.2132	125.468		30.799	100.74		191.924	58.0416				65.2132	89.6805	125.468	172.542				30.799	46.7562	100.74	138.537				191.924	323.393	58.0416	97.8005
	34.7279	67.6985		26.0711	88.7696		22.0711	22.3137				34.7279	47.7574	67.6985	93.0982				26.0711	39.5787	88.7696	122.075				22.0711	37.19	22.3137	37.5987
	32.8995	50.8701		44.3848	84.3259		29.3848	30.0711				32.8995	45.243	50.8701	69.956				44.3848	67.3809	84.3259	115.964				29.3848	49.5136	30.0711	50.67
	184.681	23.7279		71.598	315.421		16.8995	43.5563				184.681	253.972	23.7279	32.6303				71.598	108.693	315.421	433.764				16.8995	28.4758	43.5563	73.3927
	88.1838	40.8701		19.4853	173.61		30.0711	17.8995				88.1838	121.269	40.8701	56.2041				19.4853	29.5808	173.61	238.747				30.0711	50.67	17.8995	30.1608
	29.5563	123.083		97.598	77.6274		32.1421	44.0416				29.5563	40.6455	123.083	169.263				97.598	148.164	77.6274	106.752				32.1421	54.1597	44.0416	74.2104
	22.2426	52.1127		57.7696	253.652		70.0122	49.8701				22.2426	30.5878	52.1127	71.6648				57.7696	87.7004	253.652	348.819				70.0122	117.971	49.8701	84.0315
	63.6985	76.6985		143.782	65.4264		25.7279	60.9411				63.6985	87.5975	76.6985	105.475				143.782	218.276	65.4264	89.9737				25.7279	43.3517	60.9411	102.686
	76.4264	52.3848		30.4853	46.3848		22.3137	55.4558				76.4264	105.101	52.3848	72.039				30.4853	46.2799	46.3848	63.7879				22.3137	37.5987	55.4558	93.4434
	35.3848	310.877		58.5269	239.208		47.8701	78.3553				35.3848	48.6608	310.877	427.515				58.5269	88.8501	239.208	328.956				47.8701	80.6615	78.3553	132.029
	103.941	77.4264		34.1421	43.5563		29.0711	20.6569				103.941	142.939	77.4264	106.476				34.1421	51.8314	43.5563	59.8981				29.0711	48.985	20.6569	34.807
	124.74	82.1127		109.083	53.5269		60.6274	15.0711				124.74	171.541	82.1127	112.92				109.083	165.6	53.5269	73.6096				60.6274	102.158	15.0711	25.3949
	183.823	63.5269		60.6985	67.6985		53.9411	34.4558				183.823	252.792	63.5269	87.3615				60.6985	92.1468	67.6985	93.0982				53.9411	90.8911	34.4558	58.0583
	57.799	78.6274		55.6274	59.1127		33.8995	34.4853				57.799	79.4845	78.6274	108.128				55.6274	84.4483	59.1127	81.2911				33.8995	57.1209	34.4853	58.108
	83.1838	35.1421		84.4975	58.2132		48.5269	28.8995				83.1838	114.393	35.1421	48.327				84.4975	128.276	58.2132	80.0541				48.5269	81.7682	28.8995	48.6959
	80.8406	120.326		44.6274	78.9411		271.35	63.0122				80.8406	111.171	120.326	165.471				44.6274	67.7492	78.9411	108.559				271.35	457.227	63.0122	106.176
	68.3553	65.669		34.7279	32.9706		42.3848	24.5563				68.3553	94.0014	65.669	90.3073				34.7279	52.7207	32.9706	45.3408				42.3848	71.4187	24.5563	41.3775
	14.8284	22.8995		51.0416	136.811		48.6985	65.0416				14.8284	20.3919	22.8995	31.4911				51.0416	77.4866	136.811	188.141				48.6985	82.0573	65.0416	109.596
	24.9706	175.681		46.6985	42.799		49.799	30.8995				24.9706	34.3393	175.681	241.595				46.6985	70.8933	42.799	58.8567				49.799	83.9117	30.8995	52.0659
	124.468	28.799		52.1127	96.1838		62.598	48.9706				124.468	171.167	28.799	39.6041				52.1127	79.1126	96.1838	132.271				62.598	105.478	48.9706	82.5158
	35.5563	116.468		73.3553	57.0416		58.9706	33.6274				35.5563	48.8966	116.468	160.165				73.3553	111.361	57.0416	78.443				58.9706	99.3659	33.6274	56.6624
	49.799	195.995		48.1127	133.61		31.9706	45.9706				49.799	68.483	195.995	269.53				48.1127	73.0402	133.61	183.739				31.9706	53.8707	45.9706	77.4608
	156.853	227.108		157.61	28.8995		78.3553	13.2426				156.853	215.702	227.108	312.316				157.61	239.269	28.8995	39.7423				78.3553	132.029	13.2426	22.3139
	58.799	59.4558		43.0416	30.0711		44.6985	54.1127				58.799	80.8597	59.4558	81.763				43.0416	65.3417	30.0711	41.3534				44.6985	75.3173	54.1127	91.1803
	22.8995	271.421		46.799	78.6274		47.5269	26.9706				22.8995	31.4911	271.421	373.256				46.799	71.0459	78.6274	108.128				47.5269	80.0832	26.9706	45.4457
	100.941	40.3848		183.681	117.012		45.1127	83.669				100.941	138.813	40.3848	55.5367				183.681	278.848	117.012	160.914				45.1127	76.0152	83.669	140.983
	59.5269	37.1421		53.4558	82.0122		48.4558	70.0122				59.5269	81.8607	37.1421	51.0774				53.4558	81.1516	82.0122	112.782				48.4558	81.6484	70.0122	117.971
	149.426	62.6985		173.681	172.711		43.1421	25.0711				149.426	205.49	62.6985	86.2223				173.681	263.667	172.711	237.51				43.1421	72.6947	25.0711	42.245
	67.6985	125.811		46.9706	37.799		36.9706	66.5685				67.6985	93.0982	125.811	173.014				46.9706	71.3064	37.799	51.9808				36.9706	62.2957	66.5685	112.168
	32.8995	54.6274		141.681	54.8701		161.953	52.9706				32.8995	45.243	54.6274	75.123				141.681	215.087	54.8701	75.4567				161.953	272.892	52.9706	89.2558
	91.9411	86.8406		65.1421	79.7696		142.468	87.1543				91.9411	126.436	86.8406	119.422				65.1421	98.8927	79.7696	109.698				142.468	240.06	87.1543	146.856
	41.799	24.4853		42.2132	96.598		26.7279	368.948				41.799	57.4815	24.4853	33.6719				42.2132	64.0841	96.598	132.84				26.7279	45.0367	368.948	621.68
	111.711	35.2843		22.1421	19.1421		25.8995	58.9411				111.711	153.623	35.2843	48.5226				22.1421	33.6141	19.1421	26.324				25.8995	43.6408	58.9411	99.3162
	188.439	93.3553		31.6569	100.569		55.8701	40.3848				188.439	259.139	93.3553	128.381				31.6569	48.0586	100.569	138.301				55.8701	94.1415	40.3848	68.0487
	112.74	168.983		54.3553	44.1421		31.4558	92.9117				112.74	155.039	168.983	232.383				54.3553	82.5172	44.1421	60.7037				31.4558	53.0032	92.9117	156.557
	148.51	52.4264		33.7279	103.184		31.8995	41.3137				148.51	204.229	52.4264	72.0962				33.7279	51.2026	103.184	141.897				31.8995	53.7509	41.3137	69.6139
	38.6274	86.8701		41.6274	47.2132		19.7279	78.8701				38.6274	53.12	86.8701	119.463				41.6274	63.1948	47.2132	64.9271				19.7279	33.2417	78.8701	132.897
	136.569	151.125		83.5269	67.5269		48.4558	110.426				136.569	187.807	151.125	207.825				83.5269	126.803	67.5269	92.8622				48.4558	81.6484	110.426	186.069
	151.882	86.3553		33.3848	95.9411		62.9411	38.9706				151.882	208.867	86.3553	118.755				33.3848	50.6817	95.9411	131.937				62.9411	106.056	38.9706	65.6657
	106.154	169.924		68.598	32.3137		76.8995	82.5269				106.154	145.982	169.924	233.677				68.598	104.139	32.3137	44.4374				76.8995	129.576	82.5269	139.058
	122.841	126.326		38.3848	43.3848		25.4853	57.6985				122.841	168.929	126.326	173.722				38.3848	58.2722	43.3848	59.6623				25.4853	42.9429	57.6985	97.2224
	37.3848	33.6274		33.5563	88.1838		65.6985	27.1421				37.3848	51.4112	33.6274	46.244				33.5563	50.942	88.1838	121.269				65.6985	110.702	27.1421	45.7346
	43.8995	34.6274		40.1127	117.912		38.1421	161.024				43.8995	60.3701	34.6274	47.6192				40.1127	60.8954	117.912	162.151				38.1421	64.2697	161.024	271.327
	134.581	15.7279		101.154	30.4558		32.799	245.35				134.581	185.074	15.7279	21.6288				101.154	153.563	30.4558	41.8825				32.799	55.2665	245.35	413.417
	24.8995	19.4853		40.8995	37.4853		51.3848	120.196				24.8995	34.2415	19.4853	26.796				40.8995	62.0898	37.4853	51.5494				51.3848	86.5838	120.196	202.531
	67.0416	124.225		114.012	42.3553		26.0711	33.7279				67.0416	92.1949	124.225	170.833				114.012	173.083	42.3553	58.2465				26.0711	43.93	33.7279	56.8317
	52.3848	55.8701		14.8995	76.6274		62.8701	39.4558				52.3848	72.039	55.8701	76.8319				14.8995	22.619	76.6274	105.377				62.8701	105.937	39.4558	66.4833
	329.907	27.1421		112.054	22.8284		97.5685	57.1421				329.907	453.684	27.1421	37.3255				112.054	170.11	22.8284	31.3934				97.5685	164.404	57.1421	96.2848
	19.3137	370.919		113.498	48.6274		82.8406	21.2426				19.3137	26.56	370.919	510.083				113.498	172.301	48.6274	66.8719				82.8406	139.587	21.2426	35.7939
	59.799	60.6985		61.9706	32.9706		38.8995	111.498				59.799	82.2349	60.6985	83.4719				61.9706	94.078	32.9706	45.3408				38.8995	65.5459	111.498	187.874
	171.811	27.4853		31.3137	103.64		56.6985	92.0833				171.811	236.273	27.4853	37.7975				31.3137	47.5375	103.64	142.524				56.6985	95.5374	92.0833	155.161
	33.1421	34.5563		85.0122	78.7401		57.8701	71.6985				33.1421	45.5766	34.5563	47.5214				85.0122	129.058	78.7401	108.283				57.8701	97.5115	71.6985	120.812
	23.6569	29.1421		91.598	30.6274		29.799	32.3137				23.6569	32.5327	29.1421	40.0759				91.598	139.056	30.6274	42.1185				29.799	50.2115	32.3137	54.4488
	66.6274	108.669		221.723	183.912		50.9411	33.3848				66.6274	91.6253	108.669	149.44				221.723	336.599	183.912	252.913				50.9411	85.8361	33.3848	56.2536
	37.1421	63.6985		58.1127	174.238		39.2132	49.6985				37.1421	51.0774	63.6985	87.5975				58.1127	88.2213	174.238	239.61				39.2132	66.0745	49.6985	83.7423
	35.1421	46.3848		91.3553	51.8701		43.9706	78.2548				35.1421	48.327	46.3848	63.7879				91.3553	138.687	51.8701	71.3312				43.9706	74.0908	78.2548	131.86
	50.5269	60.0416		159.853	55.1421		93.598	60.8995				50.5269	69.484	60.0416	82.5685				159.853	242.674	55.1421	75.8308				93.598	157.713	60.8995	102.616
	47.2132	68.1127		31.8995	27.3137		37.9706	101.113				47.2132	64.9271	68.1127	93.6678				31.8995	48.4268	27.3137	37.5615				37.9706	63.9807	101.113	170.376
	22.8995	79.2548		48.9706	64.2132		109.711	57.0416				22.8995	31.4911	79.2548	108.99				48.9706	74.3426	64.2132	88.3053				109.711	184.863	57.0416	96.1155
	25.4853	34.5563		105.326	58.6274		27.799	310.179				25.4853	35.0471	34.5563	47.5214				105.326	159.896	58.6274	80.6237				27.799	46.8415	310.179	522.653
	41.9706	38.0711		46.6985	50.7696		84.8406	96.4264				41.9706	57.7175	38.0711	52.355				46.6985	70.8933	50.7696	69.8178				84.8406	142.957	96.4264	162.479
	95.397	72.1421		314.007	73.6985		214.066	37.0711				95.397	131.189	72.1421	99.209				314.007	476.696	73.6985	101.349				214.066	360.703	37.0711	62.4651
	22.9706	35.7279		65.2132	124.953		64.8406	47.3848				22.9706	31.5889	35.7279	49.1326				65.2132	99.0006	124.953	171.834				64.8406	109.257	47.3848	79.8437
	48.1421	24.6569		55.2843	163.439		78.0122	195.066				48.1421	66.2045	24.6569	33.9079				55.2843	83.9275	163.439	224.759				78.0122	131.451	195.066	328.688
	117.811	211.48		42.3848	26.5563		126.569	24.3848				117.811	162.013	211.48	290.825				42.3848	64.3447	26.5563	36.5199				126.569	213.269	24.3848	41.0886
	77.598	93.6274		89.3553	38.0416		67.8701	36.0711				77.598	106.712	93.6274	128.755				89.3553	135.651	38.0416	52.3144				67.8701	114.362	36.0711	60.7801
	34.9706	97.2843		56.6985	69.2548		216.823	32.4853				34.9706	48.0912	97.2843	133.784				56.6985	86.0744	69.2548	95.2384				216.823	365.349	32.4853	54.738
	63.0122	22.3848		73.799	35.9706		77.9411	27.5563				63.0122	86.6537	22.3848	30.7833				73.799	112.035	35.9706	49.4664				77.9411	131.331	27.5563	46.4326
	74.598	30.7279		30.3848	83.5269		80.3553	51.6985				74.598	102.586	30.7279	42.2567				30.3848	46.1274	83.5269	114.865				80.3553	135.399	51.6985	87.1123
	27.7279	39.6274		43.2843	42.2132		36.0416	83.1127				27.7279	38.1311	39.6274	54.4952				43.2843	65.7102	42.2132	58.0511				36.0416	60.7304	83.1127	140.045
	72.8701	98.9411		30.8995	36.2843		58.9706	36.6985				72.8701	100.21	98.9411	136.063				30.8995	46.9087	36.2843	49.8978				58.9706	99.3659	36.6985	61.8372
	21.6569	122.569		148.539	64.8701		46.2132	166.439				21.6569	29.7823	122.569	168.555				148.539	225.498	64.8701	89.2086				46.2132	77.8696	166.439	280.45
	158.137	88.0416		28.3137	15.6569		279.037	51.2843				158.137	217.468	88.0416	121.074				28.3137	42.9832	15.6569	21.5312				279.037	470.179	51.2843	86.4144
	45.7696	15.7279		22.3137	71.2132		58.9411	91.2548				45.7696	62.9418	15.7279	21.6288				22.3137	33.8746	71.2132	97.9316				58.9411	99.3162	91.2548	153.765
	40.8995	63.8701		37.1421	34.7279		106.912	42.5563				40.8995	56.2445	63.8701	87.8334				37.1421	56.3857	34.7279	47.7574				106.912	180.147	42.5563	71.7077
	45.6274	21.6569		47.4558	37.1421		23.9706	223.723				45.6274	62.7463	21.6569	29.7823				47.4558	72.043	37.1421	51.0774				23.9706	40.3906	223.723	376.975
	91.1838	48.7279		56.2132	219.054		24.0711	117.64				91.1838	125.395	48.7279	67.0101				56.2132	85.3376	219.054	301.24				24.0711	40.56	117.64	198.224
	53.2132	111.598		45.2843	78.7696		33.9706	67.8406				53.2132	73.1782	111.598	153.468				45.2843	68.7464	78.7696	108.323				33.9706	57.2407	67.8406	114.312
	58.4558	28.7279		34.6274	194.551		177.439	27.2426				58.4558	80.3878	28.7279	39.5063				34.6274	52.5681	194.551	267.545				177.439	298.985	27.2426	45.904
	14.7279	25.3137		29.7279	108.983		50.598	241.409				14.7279	20.2536	25.3137	34.8111				29.7279	45.1301	108.983	149.872				50.598	85.258	241.409	406.776
	63.9117	74.598		20.1421	65.598		51.5269	48.1421				63.9117	87.8907	74.598	102.586				20.1421	30.5779	65.598	90.2096				51.5269	86.8232	48.1421	81.1198
	39.799	29.7279		23.0711	56.6985		49.4853	86.7696				39.799	54.7311	29.7279	40.8815				23.0711	35.0244	56.6985	77.9711				49.4853	83.3831	86.7696	146.207
	65.1838	30.5563		139.468	88.9411		98.3553	207.267				65.1838	89.64	30.5563	42.0207				139.468	211.727	88.9411	122.311				98.3553	165.729	207.267	349.246
	59.5269	42.5563		52.6985	42.4558		82.0416	130.225				59.5269	81.8607	42.5563	58.5229				52.6985	80.002	42.4558	58.3847				82.0416	138.241	130.225	219.431
	137.054	53.8701		45.6274	105.912		37.9706	119.811				137.054	188.475	53.8701	74.0816				45.6274	69.2673	105.912	145.649				37.9706	63.9807	119.811	201.883
	22.1421	99.7401		136.397	12.8995		33.9706	68.4558				22.1421	30.4496	99.7401	137.161				136.397	207.065	12.8995	17.7392				33.9706	57.2407	68.4558	115.349
	19.6569	52.9706		69.5563	96.1543		33.799	146.983				19.6569	27.0319	52.9706	72.8446				69.5563	105.594	96.1543	132.23				33.799	56.9516	146.983	247.667
	204.823	40.8995		46.5563	125.711		36.5563	45.6985				204.823	281.671	40.8995	56.2445				46.5563	70.6774	125.711	172.876				36.5563	61.5976	45.6985	77.0023
	32.3848	21.5563		35.0711	68.3553		46.4558	67.3137				32.3848	44.5352	21.5563	29.644				35.0711	53.2417	68.3553	94.0014				46.4558	78.2784	67.3137	113.424
	210.995	39.0416		79.0122	126.368		118.569	123.841				210.995	290.158	39.0416	53.6896				79.0122	119.949	126.368	173.779				118.569	199.789	123.841	208.672
	143.539	53.6274		55.6274	54.4558		47.5563	130.154				143.539	197.393	53.6274	73.7478				55.6274	84.4483	54.4558	74.887				47.5563	80.1327	130.154	219.311
	59.0833	49.2132		28.7279	136.882		55.4558	59.0416				59.0833	81.2507	49.2132	67.6774				28.7279	43.612	136.882	188.239				55.4558	93.4434	59.0416	99.4855
	52.8701	35.7279		132.468	139.811		109.456	36.9706				52.8701	72.7064	35.7279	49.1326				132.468	201.101	139.811	192.267				109.456	184.434	36.9706	62.2957
	46.4558	112.74		193.409	57.4558		32.3137	28.4853				46.4558	63.8855	112.74	155.039				193.409	293.616	57.4558	79.0126				32.3137	54.4488	28.4853	47.9979
	51.8701	62.9411		128.74	193.095		27.1421	128.468				51.8701	71.3312	62.9411	86.5559				128.74	195.441	193.095	265.543				27.1421	45.7346	128.468	216.469
	20.3137	36.3137		26.2426	79.0833		54.1127	113.811				20.3137	27.9352	36.3137	49.9382				26.2426	39.8391	79.0833	108.754				54.1127	91.1803	113.811	191.773
	29.3848	34.2132		38.2843	32.799		45.799	42.0416				29.3848	40.4096	34.2132	47.0496				38.2843	58.1197	32.799	45.1048				45.799	77.1716	42.0416	70.8404
	114.054	36.5563		52.6274	127.083		28.6274	75.0833				114.054	156.846	36.5563	50.2718				52.6274	79.894	127.083	174.764				28.6274	48.2374	75.0833	126.516
	38.1421	159.995		19.7279	184.853		21.8284	139.024				38.1421	52.4526	159.995	220.023				19.7279	29.9491	184.853	254.208				21.8284	36.781	139.024	234.257
	46.7279	26.4853		59.4558	31.6274		41.5563	67.6985				46.7279	64.2597	26.4853	36.4223				59.4558	90.2603	31.6274	43.4936				41.5563	70.0227	67.6985	114.072
	154.711	48.4558		116.083	168.125		53.3553	87.0538				154.711	212.756	48.4558	66.6359				116.083	176.227	168.125	231.203				53.3553	89.9041	87.0538	146.686
	71.0416	56.5269		65.6985	96.6396		29.4558	42.8701				71.0416	97.6956	56.5269	77.7352				65.6985	99.7373	96.6396	132.898				29.4558	49.6332	42.8701	72.2364
	144.882	106.711		262.593	47.6985		74.8406	43.799				144.882	199.241	106.711	146.747				262.593	398.644	47.6985	65.5944				74.8406	126.107	43.799	73.8016
	43.799	58.1127		33.8701	80.0122		66.7696	209.894				43.799	60.2319	58.1127	79.9159				33.8701	51.4184	80.0122	110.032				66.7696	112.507	209.894	353.674
	52.0711	42.6985		21.5563	42.9706		35.9706	194.238				52.0711	71.6076	42.6985	58.7185				21.5563	32.7248	42.9706	59.0927				35.9706	60.6107	194.238	327.292
	31.8995	65.598		115.326	117.255		38.4558	25.3137				31.8995	43.8678	65.598	90.2096				115.326	175.077	117.255	161.247				38.4558	64.7983	25.3137	42.6538
	131.397	168.61		42.2132	48.2843		87.1838	45.2132				131.397	180.696	168.61	231.871				42.2132	64.0841	48.2843	66.4				87.1838	146.905	45.2132	76.1846
	35.4853	56.799		46.3848	44.1421		16.1421	198.196				35.4853	48.799	56.799	78.1094				46.3848	70.4171	44.1421	60.7037				16.1421	27.1996	198.196	333.962
	28.5563	60.2843		36.3848	42.2843		52.8701	119.711				28.5563	39.2703	60.2843	82.9023				36.3848	55.236	42.2843	58.1489				52.8701	89.0865	119.711	201.713
	18.0711	57.6985		42.0416	132.397		29.799	105.113				18.0711	24.8512	57.6985	79.3463				42.0416	63.8236	132.397	182.071				29.799	50.2115	105.113	177.116
	153.782	79.5269		83.5269	115.388		15.4853	36.1421				153.782	211.479	79.5269	109.365				83.5269	126.803	115.388	158.68				15.4853	26.0928	36.1421	60.8997
	96.1838	42.0416		22.8995	82.4558		73.8701	26.5563				96.1838	132.271	42.0416	57.8151				22.8995	34.7639	82.4558	113.392				73.8701	124.472	26.5563	44.7476
	152.51	125.125		51.1421	51.4558		203.539	125.61				152.51	209.73	125.125	172.07				51.1421	77.6392	51.4558	70.7614				203.539	342.965	125.61	211.654
	189.054	93.2843		68.4558	109.225		159.64	28.7279				189.054	259.985	93.2843	128.284				68.4558	103.923	109.225	150.206				159.64	268.994	28.7279	48.4067
	41.3848	128.882		37.4853	44.8284		31.1421	128.225				41.3848	56.9119	128.882	177.238				37.4853	56.9067	44.8284	61.6475				31.1421	52.4747	128.225	216.061
	35.3848	234.066		46.4558	84.4975		18.8284	29.8995				35.3848	48.6608	234.066	321.885				46.4558	70.5249	84.4975	116.2				18.8284	31.726	29.8995	50.3809
	40.5269	41.8701		64.6985	262.25		37.0416	90.669				40.5269	55.7321	41.8701	57.5793				64.6985	98.2192	262.25	360.643				37.0416	62.4154	90.669	152.778
	69.9706	86.1127		75.5269	59.8701		20.3137	202.451				69.9706	96.2228	86.1127	118.421				75.5269	114.658	59.8701	82.3327				20.3137	34.2287	202.451	341.131
	24.3137	47.3848		25.5563	51.4558		40.8701	43.2132				24.3137	33.4359	47.3848	65.163				25.5563	38.7972	51.4558	70.7614				40.8701	68.8664	43.2132	72.8145
	71.5269	158.196		179.368	77.8701		22.7279	36.799				71.5269	98.363	158.196	217.549				179.368	272.299	77.8701	107.086				22.7279	38.2967	36.799	62.0066
	37.7279	79.1838		56.2132	167.61		60.2843	53.6985				37.7279	51.883	79.1838	108.893				56.2132	85.3376	167.61	230.496				60.2843	101.579	53.6985	90.4824
	99.1838	50.7279		98.6396	206.196		42.3848	50.3848				99.1838	136.396	50.7279	69.7604				98.6396	149.745	206.196	283.558				42.3848	71.4187	50.3848	84.8987
	115.498	148.397		96.0833	102.983		41.3848	112.468				115.498	158.831	148.397	204.074				96.0833	145.865	102.983	141.621				41.3848	69.7337	112.468	189.509
	65.4975	36.3137		45.9706	99.9828		25.7279	31.6569				65.4975	90.0714	36.3137	49.9382				45.9706	69.7883	99.9828	137.495				25.7279	43.3517	31.6569	53.3421
	40.9411	44.7279		142.326	90.9411		146.711	75.1838				40.9411	56.3017	44.7279	61.5093				142.326	216.066	90.9411	125.061				146.711	247.209	75.1838	126.685
	95.3553	58.7696		34.5563	62.4558		44.1127	62.598				95.3553	131.132	58.7696	80.8193				34.5563	52.4602	62.4558	85.8885				44.1127	74.3302	62.598	105.478
	116.74	43.9706		59.1127	40.3137		30.3137	36.3848				116.74	160.54	43.9706	60.4679				59.1127	89.7394	40.3137	55.439				30.3137	51.0788	36.3848	61.3086
	74.7696	83.2548		58.3848	45.6274		98.2254	84.6985				74.7696	102.822	83.2548	114.491				58.3848	88.6344	45.6274	62.7463				98.2254	165.51	84.6985	142.718
	95.7696	258.321		53.4558	69.9411		73.669	40.5563				95.7696	131.701	258.321	355.24				53.4558	81.1516	69.9411	96.1822				73.669	124.133	40.5563	68.3377
	34.9706	38.6274		22.3137	35.2132		19.7279	55.4558				34.9706	48.0912	38.6274	53.12				22.3137	33.8746	35.2132	48.4248				19.7279	33.2417	55.4558	93.4434
	25.3137	81.1127		83.669	91.5269		27.2132	62.598				25.3137	34.8111	81.1127	111.545				83.669	127.018	91.5269	125.867				27.2132	45.8544	62.598	105.478
	46.6274	105.326		96.0833	96.8701		49.7696	33.0416				46.6274	64.1215	105.326	144.843				96.0833	145.865	96.8701	133.215				49.7696	83.8621	33.0416	55.6753
	84.1838	64.7279		23.8995	66.4264		62.0416	60.0416				84.1838	115.769	64.7279	89.0131				23.8995	36.282	66.4264	91.3488				62.0416	104.541	60.0416	101.171
	250.179	118.498		173.711	35.4853		27.1421	36.799				250.179	344.043	118.498	162.956				173.711	263.711	35.4853	48.799				27.1421	45.7346	36.799	62.0066
	168.752	77.1838		211.681	34.9706		43.3137	154.953				168.752	232.066	77.1838	106.142				211.681	321.355	34.9706	48.0912				43.3137	72.9839	154.953	261.097
	38.6569	52.0416		91.598	59.6274		105.083	136.154				38.6569	53.1605	52.0416	71.567				91.598	139.056	59.6274	81.9989				105.083	177.066	136.154	229.421
	24.4853	49.9411		57.0122	27.3137		19.5563	109.326				24.4853	33.6719	49.9411	68.6784				57.0122	86.5506	27.3137	37.5615				19.5563	32.9525	109.326	184.215
	76.0122	150.267		95.2548	61.1421		77.3848	64.799				76.0122	104.531	150.267	206.646				95.2548	144.607	61.1421	84.0819				77.3848	130.394	64.799	109.187
	51.1127	25.8995		36.8995	71.1127		36.5563	64.4558				51.1127	70.2896	25.8995	35.6167				36.8995	56.0174	71.1127	97.7934				36.5563	61.5976	64.4558	108.608
	29.4853	46.3848		32.1421	218.752		99.9828	143.711				29.4853	40.5479	46.3848	63.7879				32.1421	48.7951	218.752	300.826				99.9828	168.472	143.711	242.154
	196.48	156.61		22.1421	28.2426		56.2548	18.6569				196.48	270.197	156.61	215.369				22.1421	33.6141	28.2426	38.8389				56.2548	94.7897	18.6569	31.437
	45.8701	60.6274		27.9706	196.095		37.2843	78.4264				45.8701	63.0801	60.6274	83.3741				27.9706	42.4624	196.095	269.668				37.2843	62.8243	78.4264	132.149
	152.397	142.297		80.4975	45.3137		138.681	106.669				152.397	209.575	142.297	195.685				80.4975	122.204	45.3137	62.3149				138.681	233.679	106.669	179.738
	32.3848	41.2132		22.5563	44.7279		75.2843	39.0416				32.3848	44.5352	41.2132	56.6759				22.5563	34.2429	44.7279	61.5093				75.2843	126.855	39.0416	65.7854
	61.4558	65.9411		25.3137	164.196		103.012	101.74				61.4558	84.5133	65.9411	90.6815				25.3137	38.4289	164.196	225.801				103.012	173.576	101.74	171.433
	41.3137	46.2132		141.811	25.1421		91.3553	142.468				41.3137	56.8141	46.2132	63.5519				141.811	215.285	25.1421	34.5751				91.3553	153.934	142.468	240.06
	47.2843	64.0122		52.7279	80.3553		205.267	29.0711				47.2843	65.0248	64.0122	88.0289				52.7279	80.0466	80.3553	110.504				205.267	345.876	29.0711	48.985
	53.2843	58.1127		115.711	28.0711		83.3259	48.2843				53.2843	73.276	58.1127	79.9159				115.711	175.661	28.0711	38.6031				83.3259	140.405	48.2843	81.3594
	32.3137	44.6985		102.083	85.0122		47.3553	95.1543				32.3137	44.4374	44.6985	61.4689				102.083	154.973	85.0122	116.908				47.3553	79.794	95.1543	160.336
	15.0711	64.7696		22.4853	53.6985		95.7696	142.64				15.0711	20.7256	64.7696	89.0704				22.4853	34.1351	53.6985	73.8456				95.7696	161.372	142.64	240.349
	154.297	103.255		22.9706	120.882		49.9706	48.1421				154.297	212.187	103.255	141.995				22.9706	34.8718	120.882	166.236				49.9706	84.2008	48.1421	81.1198
	39.3848	92.3553		16.2426	45.1127		48.0416	84.1127				39.3848	54.1615	92.3553	127.006				16.2426	24.658	45.1127	62.0385				48.0416	80.9504	84.1127	141.73
	73.0122	75.5269		253.622	96.3259		66.6274	41.0416				73.0122	100.406	75.5269	103.864				253.622	385.026	96.3259	132.466				66.6274	112.268	41.0416	69.1554
	32.3137	84.1838		155.297	93.8406		43.3553	172.953				32.3137	44.4374	84.1838	115.769				155.297	235.757	93.8406	129.049				43.3553	73.054	172.953	291.428
	60.0416	218.652		77.9411	81.4264		31.3848	41.2132				60.0416	82.5685	218.652	300.688				77.9411	118.323	81.4264	111.977				31.3848	52.8836	41.2132	69.4445
	20.4853	56.5563		91.1543	54.6274		22.1421	102.74				20.4853	28.1712	56.5563	77.7756				91.1543	138.382	54.6274	75.123				22.1421	37.3096	102.74	173.118
	84.0122	19.7279		31.3848	70.4558		105.355	24.3848				84.0122	115.533	19.7279	27.1296				31.3848	47.6455	70.4558	96.89				105.355	177.524	24.3848	41.0886
	44.1421	46.6569		40.799	60.6274		27.6569	36.1421				44.1421	60.7037	46.6569	64.162				40.799	61.9372	60.6274	83.3741				27.6569	46.6021	36.1421	60.8997
	60.6274	47.5563		74.9411	56.0416		47.2132	36.7279				60.6274	83.3741	47.5563	65.3989				74.9411	113.769	56.0416	77.0678				47.2132	79.5546	36.7279	61.8868
	98.669	80.2843		20.4853	66.0122		22.6569	73.6274				98.669	135.689	80.2843	110.406				20.4853	31.0989	66.0122	90.7792				22.6569	38.177	73.6274	124.063
	65.1838	78.5269		34.3137	62.6985		196.61	79.6985				65.1838	89.64	78.5269	107.989				34.3137	52.0919	62.6985	86.2223				196.61	331.29	79.6985	134.293
	75.9117	96.0122		34.2132	35.7279		15.8284	151.61				75.9117	104.393	96.0122	132.035				34.2132	51.9393	35.7279	49.1326				15.8284	26.671	151.61	255.464
	58.4558	87.0122		160.853	144.439		20.1421	59.598				58.4558	80.3878	87.0122	119.658				160.853	244.192	144.439	198.63				20.1421	33.9396	59.598	100.423
	21.7279	53.8701		61.1127	31.1421		92.9117	247.35				21.7279	29.88	53.8701	74.0816				61.1127	92.7756	31.1421	42.8263				92.9117	156.557	247.35	416.787
	232.622	23.6569		94.2548	58.2132		11.4853	82.3553				232.622	319.9	23.6569	32.5327				94.2548	143.089	58.2132	80.0541				11.4853	19.3528	82.3553	138.769
	47.1127	38.8701		43.2843	60.4558		26.8995	65.9706				47.1127	64.7889	38.8701	53.4537				43.2843	65.7102	60.4558	83.1381				26.8995	45.3258	65.9706	111.161
	82.0416	200.681		20.1421	49.6985		33.4853	49.2843				82.0416	112.823	200.681	275.975				20.1421	30.5779	49.6985	68.3448				33.4853	56.423	49.2843	83.0444
	95.8406	65.6985		26.6569	176.066		43.0416	20.4853				95.8406	131.799	65.6985	90.3478				26.6569	40.468	176.066	242.124				43.0416	72.5254	20.4853	34.5179
	31.5563	90.3259		194.681	113.184		51.3553	141.995				31.5563	43.3959	90.3259	124.215				194.681	295.547	113.184	155.649				51.3553	86.534	141.995	239.262
Culture 2	108.397	82.3259	Culture 2	225.48	136.397	culture 2	266.037	93.598		mean KO EFGP ctrl	180.869	108.397	59.9311	82.3259	45.5168	culture 2	mean KO C4 ctrl	169.974	225.48	132.655	136.397	80.2457	culture 2	mean KO C4-D103ctrl	167.522	266.037	158.807	93.598	55.8722
	189.894	100.154		139.468	101.468		358.505	342.463		mean normalized KO EGFP ctrl	100	189.894	104.99	100.154	55.3738		mean normalized KO C4 ctrl	100	139.468	82.0524	101.468	59.6961		mean normalized KO C4-D103 ctrl	100	358.505	214.005	342.463	204.429
	133.669	205.995		301.019	56.6985		47.8701	168.61		mean normalized KO EGFP sema3E	105.654	133.669	73.9036	205.995	113.891		mean normalized KOC4sema3E	116.907	301.019	177.097	56.6985	33.3571		mean normalized KO C4-D103 sema3E	100.874	47.8701	28.5755	168.61	100.65
	205.48	1181.53		64.0416	83.2843		345.321	94.9828				205.48	113.607	1181.53	653.248				64.0416	37.6772	83.2843	48.9982				345.321	206.135	94.9828	56.6988
	321.593	99.6985		98.9828	195.451		814.068	128.87				321.593	177.804	99.6985	55.1218				98.9828	58.234	195.451	114.988				814.068	485.948	128.87	76.9275
	85.3553	106.912		119.012	190.61		143.225	252.208				85.3553	47.1917	106.912	59.1099				119.012	70.0178	190.61	112.141				143.225	85.4967	252.208	150.553
	50.6274	74.2843		150.338	474.931		152.255	173.51				50.6274	27.9911	74.2843	41.0707				150.338	88.4476	474.931	279.413				152.255	90.8867	173.51	103.575
	84.0122	257.451		42.0416	100.083		284.551	92.669				84.0122	46.4491	257.451	142.341				42.0416	24.7341	100.083	58.8814				284.551	169.859	92.669	55.3177
	157.823	146.125		116.024	140.924		135.74	243.35				157.823	87.2582	146.125	80.7903				116.024	68.26	140.924	82.909				135.74	81.0284	243.35	145.265
	129.154	174.823		221.196	180.752		146.811	346.747				129.154	71.4075	174.823	96.6572				221.196	130.135	180.752	106.341				146.811	87.6372	346.747	206.987
	100.225	173.51		121.326	431.475		98.669	51.5269				100.225	55.4131	173.51	95.9309				121.326	71.379	431.475	253.847				98.669	58.8993	51.5269	30.7584
	371.019	105.983		194.853	461.973		149.912	107.397				371.019	205.131	105.983	58.5963				194.853	114.637	461.973	271.79				149.912	89.488	107.397	64.1094
	189.439	94.0416		189.681	209.297		65.4264	105.841				189.439	104.738	94.0416	51.9942				189.681	111.594	209.297	123.134				65.4264	39.0555	105.841	63.1803
	186.61	151.622		126.853	710.423		71.4558	189.024				186.61	103.174	151.622	83.8297				126.853	74.6306	710.423	417.959				71.4558	42.6547	189.024	112.836
	83.598	144.823		120.498	112.669		137.439	90.9117				83.598	46.2201	144.823	80.0707				120.498	70.8916	112.669	66.2859				137.439	82.0423	90.9117	54.2687
	229.35	131.426		82.1127	127.811		103.154	46.8701				229.35	126.804	131.426	72.6637				82.1127	48.3089	127.811	75.1944				103.154	61.5767	46.8701	27.9785
	532.47	176.35		91.9706	130.095		218.907	64.8701				532.47	294.395	176.35	97.5014				91.9706	54.1085	130.095	76.5384				218.907	130.674	64.8701	38.7234
	192.865	181.823		421.659	76.9828		113.598	51.1838				192.865	106.632	181.823	100.527				421.659	248.072	76.9828	45.2909				113.598	67.811	51.1838	30.5536
	104.64	80.799		174.125	162.154		95.2548	152.782				104.64	57.8537	80.799	44.6726				174.125	102.442	162.154	95.3993				95.2548	56.8612	152.782	91.2012
	43.1421	126.711		130.539	419.061		540.855	93.8701				43.1421	23.8526	126.711	70.0564				130.539	76.7993	419.061	246.544				540.855	322.857	93.8701	56.0346
	390.375	125.468		74.669	61.8406		113.326	134.74				390.375	215.832	125.468	69.3694				74.669	43.9296	61.8406	36.3823				113.326	67.6485	134.74	80.4315
	65.3553	99.0122		94.8406	138.225		88.9411	361.262				65.3553	36.134	99.0122	54.7424				94.8406	55.797	138.225	81.3214				88.9411	53.0923	361.262	215.651
	209.924	84.8406		125.882	91.4975		310.149	109.882				209.924	116.064	84.8406	46.9071				125.882	74.0596	91.4975	53.8302				310.149	185.14	109.882	65.5929
	101.426	151.368		283.267	112.569		170.225	92.7696				101.426	56.0771	151.368	83.6888				283.267	166.653	112.569	66.2268				170.225	101.614	92.7696	55.3777
	68.1127	282.22		195.421	401.865		104.74	314.806				68.1127	37.6585	282.22	156.035				195.421	114.971	401.865	236.427				104.74	62.5233	314.806	187.92
	100.669	102.498		90.4853	204.539		129.426	75.9828				100.669	55.6584	102.498	56.6693				90.4853	53.2347	204.539	120.335				129.426	77.2595	75.9828	45.357
	72.9117	73.0416		294.865	141.397		138.468	552.215				72.9117	40.3118	73.0416	40.3836				294.865	173.476	141.397	83.1873				138.468	82.6568	552.215	329.638
	129.196	198.468		112.983	61.8701		83.4975	102.983				129.196	71.4305	198.468	109.73				112.983	66.4705	61.8701	36.3997				83.4975	49.8428	102.983	61.4744
	155.38	150.095		105.669	130.184		140.811	406.404				155.38	85.9071	150.095	82.9855				105.669	62.1676	130.184	76.5903				140.811	84.0556	406.404	242.598
	53.6985	202.48		231.581	174.208		187.782	56.4558				53.6985	29.6891	202.48	111.948				231.581	136.245	174.208	102.491				187.782	112.094	56.4558	33.7006
	405.576	105.284		110.983	75.5269		32.9706	109.296				405.576	224.237	105.284	58.2101				110.983	65.2939	75.5269	44.4343				32.9706	19.6814	109.296	65.2432
	266.25	51.3848		180.368	78.9117		95.6274	110.882				266.25	147.206	51.3848	28.4099				180.368	106.115	78.9117	46.4257				95.6274	57.0836	110.882	66.1899
	92.6396	100.598		80.0833	421.806		56.2843	88.8112				92.6396	51.219	100.598	55.6191				80.0833	47.115	421.806	248.159				56.2843	33.5982	88.8112	53.0148
	106.196	148.882		212.208	620.867		53.1127	184.965				106.196	58.7142	148.882	82.3148				212.208	124.847	620.867	365.271				53.1127	31.705	184.965	110.413
	191.924	115.841		115.711	235.664		119.983	194.037				191.924	106.112	115.841	64.0465				115.711	68.0754	235.664	138.647				119.983	71.6223	194.037	115.828
	62.3553	124.012		442.961	87.3848		265.723	172.338				62.3553	34.4753	124.012	68.5645				442.961	260.604	87.3848	51.4106				265.723	158.62	172.338	102.875
	126.255	216.279		103.569	82.5269		60.6274	221.995				126.255	69.8044	216.279	119.578				103.569	60.9319	82.5269	48.5526				60.6274	36.1908	221.995	132.517
	128.882	228.309		289.966	109.799		453.316	102.669				128.882	71.2571	228.309	126.228				289.966	170.594	109.799	64.5974				453.316	270.601	102.669	61.287
	137.297	236.581		110.912	438.12		165.397	161.711				137.297	75.9092	236.581	130.802				110.912	65.2521	438.12	257.757				165.397	98.7318	161.711	96.5313
	167.48	414.031		85.2548	88.4975		416.576	162.267				167.48	92.5973	414.031	228.912				85.2548	50.1575	88.4975	52.0652				416.576	248.67	162.267	96.8633
	181.397	138.498		101.385	178.965		283.451	149.811				181.397	100.292	138.498	76.5732				101.385	59.6471	178.965	105.29				283.451	169.203	149.811	89.428
	228.995	24.7279		176.51	421.475		67.1838	242.066				228.995	126.608	24.7279	13.6717				176.51	103.845	421.475	247.964				67.1838	40.1046	242.066	144.498
	160.267	150.024		47.1127	160.622		546.056	105.042				160.267	88.6092	150.024	82.9462				47.1127	27.7176	160.622	94.4981				546.056	325.962	105.042	62.7033
	145.154	238.066		353.848	59.598		99.1127	32.2132				145.154	80.2536	238.066	131.623				353.848	208.177	59.598	35.063				99.1127	59.1641	32.2132	19.2293
	67.2843	122.711		110.255	448.588		129.953	342.363				67.2843	37.2005	122.711	67.8449				110.255	64.8656	448.588	263.915				129.953	77.5741	342.363	204.369
	97.3259	90.8112		228.167	57.6274		70.1127	140.397				97.3259	53.81	90.8112	50.2081				228.167	134.236	57.6274	33.9036				70.1127	41.8529	140.397	83.8083
	150.64	66.6274		80.8406	111.782		72.0122	100.397				150.64	83.2864	66.6274	36.8373				80.8406	47.5605	111.782	65.7639				72.0122	42.9868	100.397	59.9308
	512.227	167.439		164.439	126.711		192.321	175.095				512.227	283.203	167.439	92.5743				164.439	96.7432	126.711	74.547				192.321	114.804	175.095	104.521
	164.752	129.698		66.8701	341.179		293.664	181.208				164.752	91.0891	129.698	71.7083				66.8701	39.3413	341.179	200.724				293.664	175.299	181.208	108.17
	205.451	90.5269		127.51	37.6274		161.953	304.919				205.451	113.591	90.5269	50.051				127.51	75.0171	37.6274	22.1371				161.953	96.6761	304.919	182.018
	202.894	159.853		125.368	267.078		64.3553	227.836				202.894	112.177	159.853	88.3802				125.368	73.7568	267.078	157.129				64.3553	38.4161	227.836	136.004
	207.652	167.752		151.154	184.397		131.439	275.664				207.652	114.808	167.752	92.7477				151.154	88.9278	184.397	108.485				131.439	78.4607	275.664	164.554
	245.681	307.309		31.6569	72.8701		88.4264	24.0711				245.681	135.833	307.309	169.906				31.6569	18.6245	72.8701	42.8713				88.4264	52.7851	24.0711	14.369
	430.174	250.782		198.409	131.196		134.083	60.9411				430.174	237.837	250.782	138.653				198.409	116.729	131.196	77.1858				134.083	80.0394	60.9411	36.3781
	97.8406	38.2132		93.7401	133.284		150.498	147.297				97.8406	54.0946	38.2132	21.1275				93.7401	55.1496	133.284	78.4144				150.498	89.8377	147.297	87.9269
	97.4264	979.833		200.622	83.598		106.225	116.669				97.4264	53.8656	979.833	541.735				200.622	118.031	83.598	49.1827				106.225	63.41	116.669	69.6442
	437.014	87.1838		54.0416	300.392		86.4975	62.7696				437.014	241.619	87.1838	48.2026				54.0416	31.794	300.392	176.728				86.4975	51.6336	62.7696	37.4696
	220.581	85.3848		81.1838	91.1249		217.907	149.024				220.581	121.956	85.3848	47.208				81.1838	47.7624	91.1249	53.611				217.907	130.077	149.024	88.9583
	198.066	82.5269		154.882	73.1127		61.3553	56.5269				198.066	109.508	82.5269	45.6279				154.882	91.121	73.1127	43.014				61.3553	36.6253	56.5269	33.7431
	138.983	141.61		130.782	217.38		520.056	298.551				138.983	76.8415	141.61	78.2941				130.782	76.9421	217.38	127.89				520.056	310.441	298.551	178.217
	98.8528	86.3259		59.799	240.735		116.983	114.355				98.8528	54.6542	86.3259	47.7283				59.799	35.1812	240.735	141.63				116.983	69.8315	114.355	68.263
	174.267	33.4853		131.125	114.569		124.125	127.539				174.267	96.3496	33.4853	18.5135				131.125	77.144	114.569	67.4034				124.125	74.0949	127.539	76.1329
	29.8995	82.6274		105.811	187.024		373.877	513.985				29.8995	16.531	82.6274	45.6834				105.811	62.2513	187.024	110.031				373.877	223.182	513.985	306.817
	296.007	699.482		125.355	205.066		58.3848	92.2548				296.007	163.658	699.482	386.733				125.355	73.7496	205.066	120.645				58.3848	34.8521	92.2548	55.0704
	248.25	159.681		180.811	58.6274		105.64	61.2132				248.25	137.254	159.681	88.2853				180.811	106.376	58.6274	34.4919				105.64	63.0603	61.2132	36.5405
	172.054	99.8112		130.64	179.551		75.0833	49.6985				172.054	95.126	99.8112	55.1841				130.64	76.8585	179.551	105.634				75.0833	44.8201	49.6985	29.6669
	130.698	590.299		147.225	62.2132		67.0416	395.617				130.698	72.2612	590.299	326.367				147.225	86.6163	62.2132	36.6015				67.0416	40.0197	395.617	236.159
	91.669	123.125		274.522	80.7696		29.9706	135.569				91.669	50.6824	123.125	68.0739				274.522	161.508	80.7696	47.5187				29.9706	17.8906	135.569	80.926
	346.392	285.397		60.1421	165.823		115.456	68.8701				346.392	191.515	285.397	157.792				60.1421	35.3831	165.823	97.5579				115.456	68.92	68.8701	41.1112
	242.551	67.0416		173.137	173.451		186.882	114.368				242.551	134.103	67.0416	37.0663				173.137	101.861	173.451	102.045				186.882	111.557	114.368	68.2703
	252.037	167.894		245.037	390.948		147.823	141.267				252.037	139.347	167.894	92.8263				245.037	144.161	390.948	230.004				147.823	88.2414	141.267	84.3276
	20.8995	232.108		69.4558	275.622		24.9706	45.6985				20.8995	11.555	232.108	128.329				69.4558	40.8625	275.622	162.155				24.9706	14.9059	45.6985	27.2792
	58.1127	88.3259		255.853	115.355		194.723	1383.68				58.1127	32.1296	88.3259	48.8341				255.853	150.524	115.355	67.8663				194.723	116.238	1383.68	825.968
	131.711	429.718		75.7696	92.1543		65.6274	220.024				131.711	72.8209	429.718	237.584				75.7696	44.5771	92.1543	54.2166				65.6274	39.1755	220.024	131.341
	319.433	340.09		576.884	151.113		44.2132	41.6274				319.433	176.61	340.09	188.031				576.884	339.395	151.113	88.9033				44.2132	26.3925	41.6274	24.849
	325.421	233.551		89.7401	106.154		321.723	178.48				325.421	179.921	233.551	129.127				89.7401	52.7963	106.154	62.4532				321.723	192.049	178.48	106.542
	214.936	143.456		93.2254	138.397		128.912	102.154				214.936	118.835	143.456	79.3146				93.2254	54.8468	138.397	81.4223				128.912	76.9523	102.154	60.9798
	110.326	147.012		142.965	47.0416		246.664	177.167				110.326	60.9975	147.012	81.2808				142.965	84.1101	47.0416	27.6757				246.664	147.243	177.167	105.757
	150.841	112.64		83.9117	290.948		68.5563	63.1127				150.841	83.3975	112.64	62.2767				83.9117	49.3673	290.948	171.172				68.5563	40.9239	63.1127	37.6744
	72.9828	269.492		88.8112	551.156		126.74	74.2548				72.9828	40.3511	269.492	148.998				88.8112	52.2498	551.156	324.259				126.74	75.656	74.2548	44.3255
	83.1127	114.941		135.569	78.2132		158.882	131.711				83.1127	45.9518	114.941	63.5492				135.569	79.7583	78.2132	46.0147				158.882	94.8429	131.711	78.6231
	200.723	196.35		191.439	220.551		132.581	129.154				200.723	110.977	196.35	108.559				191.439	112.628	220.551	129.756				132.581	79.1425	129.154	77.0971
	42.2132	129.953		117.498	109.468		105.426	777.749				42.2132	23.339	129.953	71.8492				117.498	69.1266	109.468	64.4027				105.426	62.933	777.749	464.268
	138.539	180.953		295.764	160.983		55.1127	123.51				138.539	76.5962	180.953	100.046				295.764	174.005	160.983	94.7101				55.1127	32.8989	123.51	73.7276
	138.569	118.296		83.1543	45.8995		79.9828	213.066				138.569	76.6124	118.296	65.4044				83.1543	48.9217	45.8995	27.0038				79.9828	47.7448	213.066	127.187
	87.669	251.676		122.255	107.953		137.267	101.74				87.669	48.4709	251.676	139.148				122.255	71.9255	107.953	63.5116				137.267	81.9399	101.74	60.7325
	32.799	167.723		101.225	44.9706		82.598	180.196				32.799	18.1341	167.723	92.7315				101.225	59.5534	44.9706	26.4573				82.598	49.3059	180.196	107.566
	92.5269	167.066		137.042	204.723		123.498	490.789				92.5269	51.1567	167.066	92.3683				137.042	80.6249	204.723	120.443				123.498	73.7204	490.789	292.971
	68.4264	184.711		294.137	175.297		202.894	207.338				68.4264	37.8319	184.711	102.124				294.137	173.048	175.297	103.131				202.894	121.115	207.338	123.768
	127.184	213.238		60.2132	213.279		85.3553	101.426				127.184	70.318	213.238	117.896				60.2132	35.4249	213.279	125.477				85.3553	50.9518	101.426	60.5453
	168.409	138.74		150.297	164.782		196.208	214.794				168.409	93.1109	138.74	76.7073				150.297	88.4231	164.782	96.9451				196.208	117.124	214.794	128.219
	215.167	144.581		146.368	310.291		82.5269	139.64				215.167	118.962	144.581	79.9365				146.368	86.1116	310.291	182.552				82.5269	49.2634	139.64	83.3562
	270.208	152.054		98.598	287.593		198.238	182.397				270.208	149.394	152.054	84.0683				98.598	58.0076	287.593	169.198				198.238	118.336	182.397	108.88
	229.309	179.267		164.64	102.184		156.711	97.7401				229.309	126.781	179.267	99.114				164.64	96.8615	102.184	60.1172				156.711	93.5466	97.7401	58.3448
	126.698	81.2548		70.7696	142.74		159.64	198.439				126.698	70.0497	81.2548	44.9246				70.7696	41.6355	142.74	83.9775				159.64	95.2949	198.439	118.456
	146.811	65.669		60.9411	281.409		137.368	77.3259				146.811	81.1697	65.669	36.3074				60.9411	35.8531	281.409	165.56				137.368	81.9999	77.3259	46.1588
	98.0833	123.397		277.551	301.309		146.953	150.569				98.0833	54.2288	123.397	68.2243				277.551	163.29	301.309	177.267				146.953	87.722	150.569	89.8801
	26.8995	231.25		948.205	69.3137		107.012	122.983				26.8995	14.8723	231.25	127.855				948.205	557.852	69.3137	40.7789				107.012	63.8797	122.983	73.4131
	171.125	412.605		127.569	91.9117		194.309	168.267				171.125	94.6124	412.605	228.123				127.569	75.0517	91.9117	54.0739				194.309	115.99	168.267	100.445
	231.836	279.865		481.274	800.11		97.9828	270.551				231.836	128.178	279.865	154.733				481.274	283.145	800.11	470.724				97.9828	58.4897	270.551	161.502
	52.2843	138.255		228.782	170.238		65.1127	52.3848				52.2843	28.9072	138.255	76.439				228.782	134.598	170.238	100.155				65.1127	38.8682	52.3848	31.2705
	74.0833	281.764		145.309	72.7696		182.125	76.669				74.0833	40.9595	281.764	155.783				145.309	85.4887	72.7696	42.8121				182.125	108.717	76.669	45.7666
	103.456	37.9706		83.669	527.902		118.51	103.953				103.456	57.1992	37.9706	20.9934				83.669	49.2245	527.902	310.577				118.51	70.7429	103.953	62.0537
	124.284	40.6274		142.137	75.0833		507.274	429.676				124.284	68.7149	40.6274	22.4623				142.137	83.6227	75.0833	44.1733				507.274	302.811	429.676	256.49
	114.74	27.7279		111.012	116.711		151.51	218.167				114.74	63.4381	27.7279	15.3303				111.012	65.3112	116.711	68.6638				151.51	90.4419	218.167	130.232
	128.054	174.811		84.669	271.291		13.8284	104.912				128.054	70.799	174.811	96.6505				84.669	49.8128	271.291	159.607				13.8284	8.2547	104.912	62.6258
	108.083	560.446		105.912	221.35		113.853	167.782				108.083	59.7576	560.446	309.862				105.912	62.3104	221.35	130.226				113.853	67.9631	167.782	100.155
	64.9411	186.823		34.4853	70.0833		115.882	126.782				64.9411	35.905	186.823	103.292				34.4853	20.2885	70.0833	41.2317				115.882	69.1746	126.782	75.6808
	136.054	298.279		119.113	208.693		246.22	65.8701				136.054	75.2221	298.279	164.914				119.113	70.0769	208.693	122.779				246.22	146.978	65.8701	39.3204
	169.953	97.397		170.368	105.439		205.38	136.64				169.953	93.9646	97.397	53.8493				170.368	100.231	105.439	62.0321				205.38	122.599	136.64	81.5654
	505.86	345.12		349.877	68.669		92.8406	67.8406				505.86	279.682	345.12	190.812				349.877	205.841	68.669	40.3996				92.8406	55.4201	67.8406	40.4966
	203.167	347.978		303.777	297.563		246.794	276.238				203.167	112.328	347.978	192.392				303.777	178.719	297.563	175.064				246.794	147.321	276.238	164.897
	216.51	148.782		185.711	211.309		269.078	88.2548				216.51	119.705	148.782	82.2592				185.711	109.258	211.309	124.318				269.078	160.623	88.2548	52.6826
	61.5563	129.054		98.4264	84.1127		341.517	241.037				61.5563	34.0336	129.054	71.3519				98.4264	57.9067	84.1127	49.4856				341.517	203.864	241.037	143.884
	99.2843	196.167		442.245	418.363		108.74	192.51				99.2843	54.8928	196.167	108.458				442.245	260.183	418.363	246.133				108.74	64.9111	192.51	114.916
	204.338	155.267		195.811	161.439		132.581	89.7279				204.338	112.975	155.267	85.8448				195.811	115.201	161.439	94.9783				132.581	79.1425	89.7279	53.562
	83.0416	238.539		75.1838	347.877		93.598	66.598				83.0416	45.9124	238.539	131.885				75.1838	44.2325	347.877	204.665				93.598	55.8722	66.598	39.7549
	149.551	399.492		114.711	112.397		236.451	70.2843				149.551	82.6847	399.492	220.873				114.711	67.4871	112.397	66.1259				236.451	141.146	70.2843	41.9554
	116.953	731.826		109.296	464.617		192.024	172.882				116.953	64.6617	731.826	404.615				109.296	64.3018	464.617	273.346				192.024	114.627	172.882	103.2
	121.012	168.066		81.3553	407.777		159.74	235.267				121.012	66.9058	168.066	92.9212				81.3553	47.8633	407.777	239.905				159.74	95.3549	235.267	140.44
	193.823	76.4975		682.174	138.054		160.823	406.99				193.823	107.162	76.4975	42.2943				682.174	401.339	138.054	81.2204				160.823	96.0016	406.99	242.948
	120.64	105.154		87.397	103.556		208.539	118.113				120.64	66.6998	105.154	58.1382				87.397	51.4178	103.556	60.9247				208.539	124.485	118.113	70.506
	628.754	52.9706		145.811	175.095		250.823	282.25				628.754	347.629	52.9706	29.2866				145.811	85.7843	175.095	103.013				250.823	149.726	282.25	168.486
	81.2548	192.309		782.767	147.338		104.711	302.463				81.2548	44.9246	192.309	106.325				782.767	460.521	147.338	86.6826				104.711	62.5058	302.463	180.552
	132.409	143.439		71.2843	94.4264		33.5563	161.368				132.409	73.2071	143.439	79.305				71.2843	41.9383	94.4264	55.5534				33.5563	20.031	161.368	96.3264
	136.953	92.0833		162.782	55.4558		73.1838	208.711				136.953	75.7194	92.0833	50.9115				162.782	95.7684	55.4558	32.626				73.1838	43.6862	208.711	124.587
	91.669	184.882		30.4853	156.539		165.983	48.9706				91.669	50.6824	184.882	102.219				30.4853	17.9352	156.539	92.0958				165.983	99.0814	48.9706	29.2324
	253.693	186.924		109.326	171.179		116.74	40.1421				253.693	140.263	186.924	103.347				109.326	64.3191	171.179	100.709				116.74	69.6866	40.1421	23.9623
	356.149	309.309		388.321	523.215		69.2843	126.912				356.149	196.91	309.309	171.012				388.321	228.459	523.215	307.82				69.2843	41.3584	126.912	75.7584
	159.61	102.255		277.492	96.0122		121.267	399.505				159.61	88.2461	102.255	56.5351				277.492	163.256	96.0122	56.4863				121.267	72.3889	399.505	238.479
	95.4264	176.752		613.156	555.529		178.368	525.446				95.4264	52.7598	176.752	97.7237				613.156	360.735	555.529	326.831				178.368	106.474	525.446	313.659
	95.4264	371.777		98.5269	202.882		75.669	156.167				95.4264	52.7598	371.777	205.55				98.5269	57.9658	202.882	119.361				75.669	45.1697	156.167	93.2217
	161.468	73.8701		100.527	232.894		222.953	86.2132				161.468	89.2732	73.8701	40.8417				100.527	59.1424	232.894	137.017				222.953	133.089	86.2132	51.4639
	450.233	89.0833		76.9117	43.1838		158.539	107.326				450.233	248.927	89.0833	49.2528				76.9117	45.249	43.1838	25.4061				158.539	94.638	107.326	64.0669
	173.551	189.539		169.74	463.723		123.498	86.7696				173.551	95.9539	189.539	104.793				169.74	99.8622	463.723	272.819				123.498	73.7204	86.7696	51.7961
	165.681	158.752		139.054	174.024		65.799	208.267				165.681	91.6026	158.752	87.7718				139.054	81.8087	174.024	102.383				65.799	39.2779	208.267	124.322
	70.5563	533.76		127.74	399.031		333.049	112.439				70.5563	39.0095	533.76	295.108				127.74	75.1526	399.031	234.76				333.049	198.809	112.439	67.1189
	157.012	70.0416		37.9706	109.054		74.799	377.617				157.012	86.8097	70.0416	38.7249				37.9706	22.339	109.054	64.159				74.799	44.6504	377.617	225.414
	108.326	305.551		118.841	333.747		578.475	229.078				108.326	59.8918	305.551	168.935				118.841	69.9168	333.747	196.352				578.475	345.314	229.078	136.745
	45.4558	284.078		65.9411	130.983		150.397	278.35				45.4558	25.1318	284.078	157.063				65.9411	38.7948	130.983	77.0604				150.397	89.7777	278.35	166.158
	165.853	46.3848		57.2843	125.255		468.872	180.652				165.853	91.6975	46.3848	25.6455				57.2843	33.7018	125.255	73.6905				468.872	279.888	180.652	107.838
	110.983	46.7279		280.037	237.551		93.669	71.8406				110.983	61.3607	46.7279	25.8352				280.037	164.752	237.551	139.757				93.669	55.9146	71.8406	42.8844
	94.6396	79.3848		565.032	52.4853		31.799	91.4558				94.6396	52.3248	79.3848	43.8907				565.032	332.422	52.4853	30.8784				31.799	18.982	91.4558	54.5934
	119.255	454.345		164.711	244.551		119.698	323.505				119.255	65.9342	454.345	251.201				164.711	96.9033	244.551	143.875				119.698	71.4526	323.505	193.112
	105.527	63.8995		95.5685	147.297		52.2843	147.196				105.527	58.3442	63.8995	35.3291				95.5685	56.2253	147.297	86.6581				52.2843	31.2105	147.196	87.8669
	104.426	142.426		81.7696	235.823		136.397	117.51				104.426	57.7358	142.426	78.7454				81.7696	48.107	235.823	138.741				136.397	81.4206	117.51	70.146
	117.054	172.267		46.1127	410.517		189.823	135.752				117.054	64.7173	172.267	95.2438				46.1127	27.1292	410.517	241.517				189.823	113.313	135.752	81.0357
	57.4264	77.8406		224.066	258.439		361.664	99.4975				57.4264	31.7502	77.8406	43.0369				224.066	131.823	258.439	152.046				361.664	215.891	99.4975	59.3938
	29.7279	269.149		104.154	128.569		183.61	97.8406				29.7279	16.4361	269.149	148.809				104.154	61.2765	128.569	75.64				183.61	109.604	97.8406	58.4048
	205.267	173.882		90.9411	466.63		221.037	105.154				205.267	113.489	173.882	96.1369				90.9411	53.5029	466.63	274.53				221.037	131.945	105.154	62.7706
	143.853	332.978		178.468	53.5563		381.233	107.627				143.853	79.534	332.978	184.098				178.468	104.997	53.5563	31.5085				381.233	227.572	107.627	64.2469
	42.2843	415.961		103.811	446.286		65.0122	147.752				42.2843	23.3784	415.961	229.978				103.811	61.0747	446.286	262.561				65.0122	38.8083	147.752	88.199
	151.924	81.9117		279.522	286.522		67.3553	255.894				151.924	83.9964	81.9117	45.2877				279.522	164.45	286.522	168.568				67.3553	40.2069	255.894	152.753
	334.019	672.027		76.7696	142.64		183.539	131.498				334.019	184.674	672.027	371.553				76.7696	45.1654	142.64	83.9184				183.539	109.561	131.498	78.4959
	269.563	103.941		136.669	168.338		200.924	146.368				269.563	149.038	103.941	57.4675				136.669	80.4057	168.338	99.0374				200.924	119.939	146.368	87.3723
	31.7279	202.38		30.7279	39.0416		109.598	120.326				31.7279	17.5419	202.38	111.893				30.7279	18.078	39.0416	22.9691				109.598	65.4232	120.326	71.8271
	92.468	168.024		178.51	192.681		39.1421	111.77				92.468	51.1242	168.024	92.8982				178.51	105.022	192.681	113.359				39.1421	23.3654	111.77	66.7195
	45.1127	65.1421		405.061	39.8995		350.664	129.054				45.1127	24.9421	65.1421	36.0161				405.061	238.307	39.8995	23.4738				350.664	209.325	129.054	77.0371
	176.439	88.4558		109.426	292.853		101.498	23.7279				176.439	97.5502	88.4558	48.9059				109.426	64.3782	292.853	172.292				101.498	60.5877	23.7279	14.1641
	183.995	139.225		161.823	129.255		88.5269	138.995				183.995	101.728	139.225	76.9756				161.823	95.2047	129.255	76.0438				88.5269	52.8451	138.995	82.9713
	610.073	143.095		519.014	352.563		191.309	144.024				610.073	337.3	143.095	79.1153				519.014	305.349	352.563	207.422				191.309	114.199	144.024	85.9736
	78.9117	81.1543		295.137	225.953		34.1421	186.782				78.9117	43.6291	81.1543	44.869				295.137	173.636	225.953	132.934				34.1421	20.3807	186.782	111.497
	148.196	47.799		638.943	111.841		270.25	118.154				148.196	81.9353	47.799	26.4273				638.943	375.906	111.841	65.7986				270.25	161.322	118.154	70.5308
	394.823	296.019		90.9411	46.0711		94.9411	31.7279				394.823	218.292	296.019	163.665				90.9411	53.5029	46.0711	27.1048				94.9411	56.674	31.7279	18.9396
	198.38	128.468		171.64	116.64		433.617	20.0711				198.38	109.681	128.468	71.028				171.64	100.98	116.64	68.6219				433.617	258.843	20.0711	11.9812
	232.664	133.752		142.882	66.9411		196.723	91.0833				232.664	128.636	133.752	73.9496				142.882	84.0611	66.9411	39.3831				196.723	117.431	91.0833	54.3711
	813.164	255.48		37.799	88.2843		133.953	107.012				813.164	449.586	255.48	141.251				37.799	22.2381	88.2843	51.9398				133.953	79.9618	107.012	63.8797
	315.078	297.421		98.1543	186.995		40.4558	109.042				315.078	174.202	297.421	164.44				98.1543	57.7466	186.995	110.014				40.4558	24.1496	109.042	65.0911
	197.498	262.966		311.161	99.7401		148.397	119.669				197.498	109.193	262.966	145.39				311.161	183.064	99.7401	58.6795				148.397	88.5838	119.669	71.435
	247.522	113.498		175.368	139.853		220.48	56.8701				247.522	136.851	113.498	62.7511				175.368	103.173	139.853	82.2788				220.48	131.613	56.8701	33.9479
	690.399	188.338		134.095	268.179		161.882	105.569				690.399	381.711	188.338	104.129				134.095	78.8917	268.179	157.776				161.882	96.6337	105.569	63.0179
	125.355	247.664		68.0122	206.64		158.297	312.262				125.355	69.3071	247.664	136.93				68.0122	40.0132	206.64	121.571				158.297	94.4932	312.262	186.401
	96.6396	104.782		66.1127	292.706		74.3553	146.669				96.6396	53.4306	104.782	57.9322				66.1127	38.8957	292.706	172.206				74.3553	44.3855	146.669	87.5523
	228.267	79.5269		120.941	201.468		107.184	112.912				228.267	126.205	79.5269	43.9692				120.941	71.1526	201.468	118.529				107.184	63.9821	112.912	67.4013
	232.338	209.794		150.468	252.421		326.806	147.912				232.338	128.456	209.794	115.992				150.468	88.524	252.421	148.506				326.806	195.083	147.912	88.2941
	167.61	53.1127		195.51	686.186		86.2843	180.225				167.61	92.6692	53.1127	29.3652				195.51	115.023	686.186	403.7				86.2843	51.5064	180.225	107.583
	173.936	114.125		77.4264	86.2254		131.64	82.799				173.936	96.1666	114.125	63.0979				77.4264	45.5518	86.2254	50.7285				131.64	78.5807	82.799	49.4259
	175.309	191.167		304.605	204.865		94.0416	150.154				175.309	96.9255	191.167	105.693				304.605	179.207	204.865	120.527				94.0416	56.137	150.154	89.6328
	158.024	342.291		128.811	311.22		161.167	132.426				158.024	87.3693	342.291	189.248				128.811	75.7828	311.22	183.098				161.167	96.2064	132.426	79.0504
	182.397	93.1838		373.392	190.522		65.2843	144.882				182.397	100.845	93.1838	51.5199				373.392	219.676	190.522	112.089				65.2843	38.9707	144.882	86.4858
	28.8995	144.397		129.083	152.681		203.64	129.74				28.8995	15.9781	144.397	79.8349				129.083	75.9429	152.681	89.8261				203.64	121.56	129.74	77.4468
	230.652	114.598		159.51	188.196		42.6274	206.439				230.652	127.524	114.598	63.3595				159.51	93.8434	188.196	110.72				42.6274	25.4459	206.439	123.231
	121.711	33.1421		83.7696	383.919		76.0122	309.439				121.711	67.292	33.1421	18.3238				83.7696	49.2837	383.919	225.869				76.0122	45.3746	309.439	184.716
	172.095	193.652		130.024	114.711		125.711	42.7279				172.095	95.149	193.652	107.067				130.024	76.4965	114.711	67.4871				125.711	75.0415	42.7279	25.5059
	119.752	235.936		211.208	141.983		24.1421	24.0711				119.752	66.2092	235.936	130.446				211.208	124.259	141.983	83.5319				24.1421	14.4113	24.0711	14.369
	98.2965	204.338		127.326	93.3553		52.5563	106.64				98.2965	54.3467	204.338	112.975				127.326	74.9089	93.3553	54.9232				52.5563	31.3729	106.64	63.6572
	323.794	215.723		103.77	261.421		99.8112	96.9117				323.794	179.021	215.723	119.27				103.77	61.0502	261.421	153.801				99.8112	59.5811	96.9117	57.8503
	287.078	167.681		108.326	33.5563		161.894	459.09				287.078	158.721	167.681	92.7084				108.326	63.7308	33.5563	19.742				161.894	96.6409	459.09	274.049
	128.125	753.507		78.2843	246.593		210.693	135.983				128.125	70.8383	753.507	416.603				78.2843	46.0566	246.593	145.077				210.693	125.771	135.983	81.1733
	59.9411	142.782		205.782	160.598		95.9828	183.154				59.9411	33.1405	142.782	78.9419				205.782	121.066	160.598	94.4837				95.9828	57.2958	183.154	109.332
	156.083	84.0416		56.6985	68.799		362.978	153.054				156.083	86.2961	84.0416	46.4653				56.6985	33.3571	68.799	40.4761				362.978	216.675	153.054	91.3636
	597.127	154.74		144.054	189.61		36.2132	129.154				597.127	330.143	154.74	85.5535				144.054	84.7504	189.61	111.552				36.2132	21.617	129.154	77.0971
	177.823	86.7696		83.3259	272.309		146.468	94.4975				177.823	98.3159	86.7696	47.9736				83.3259	49.0227	272.309	160.206				146.468	87.4323	94.4975	56.4092
	48.2843	72.0416		235.823	157.61		150.539	21.9706				48.2843	26.6957	72.0416	39.8307				235.823	138.741	157.61	92.7259				150.539	89.8625	21.9706	13.1151
	26.5563	343.12		257.652	335.978		81.4264	70.5269				26.5563	14.6826	343.12	189.706				257.652	151.583	335.978	197.664				81.4264	48.6065	70.5269	42.1002
	241.078	246.693		130.397	473.375		144.255	97.0122				241.078	133.289	246.693	136.393				130.397	76.7157	473.375	278.498				144.255	86.1112	97.0122	57.9103
	505.73	140.225		246.007	188.338		154.125	379.433				505.73	279.61	140.225	77.5285				246.007	144.732	188.338	110.804				154.125	92.003	379.433	226.498
	171.882	71.6985		154.125	512.245		183.953	263.492				171.882	95.0311	71.6985	39.641				154.125	90.6754	512.245	301.366				183.953	109.809	263.492	157.289
	257.836	290.061		366.404	176.066		139.054	366.475				257.836	142.553	290.061	160.37				366.404	215.564	176.066	103.584				139.054	83.0065	366.475	218.763
	154.77	233.309		107.569	280.024		160.439	229.551				154.77	85.5698	233.309	128.993				107.569	63.2852	280.024	164.745				160.439	95.7719	229.551	137.028
	194.965	131.841		80.669	60.2132		328.647	208.823				194.965	107.793	131.841	72.8927				80.669	47.4595	60.2132	35.4249				328.647	196.182	208.823	124.655
	145.51	183.083		84.6985	231.894		308.096	122.012				145.51	80.4501	183.083	101.224				84.6985	49.8302	231.894	136.429				308.096	183.914	122.012	72.8337
	306.635	95.1421		96.0122	185.037		167.095	102.184				306.635	169.534	95.1421	52.6026				96.0122	56.4863	185.037	108.862				167.095	99.7457	102.184	60.9974
	170.267	111.184		311.421	105.426		106.64	133.569				170.267	94.1381	111.184	61.4718				311.421	183.217	105.426	62.0249				106.64	63.6572	133.569	79.7321
	191.794	55.6274		203.108	202.066		167.681	260.924				191.794	106.04	55.6274	30.7556				203.108	119.493	202.066	118.88				167.681	100.095	260.924	155.755
	129.054	658.583		120.225	228.836		280.208	60.5563				129.054	71.3519	658.583	364.121				120.225	70.7315	228.836	134.63				280.208	167.267	60.5563	36.1484
	139.426	138.912		124.397	92.1543		207.953	354.563				139.426	77.0868	138.912	76.8022				124.397	73.1858	92.1543	54.2166				207.953	124.135	354.563	211.652
	791.235	543.286		177.267	76.6274		134.924	62.0833				791.235	437.462	543.286	300.375				177.267	104.29	76.6274	45.0818				134.924	80.5412	62.0833	37.0599
	164.095	107.539		117.74	125.284		442.215	44.0416				164.095	90.7259	107.539	59.4567				117.74	69.2694	125.284	73.7078				442.215	263.975	44.0416	26.2901
	109.941	156.326		204.125	183.983		184.581	130.095				109.941	60.7848	156.326	86.4302				204.125	120.092	183.983	108.242				184.581	110.183	130.095	77.659
	791.95	195.865		56.9706	203.882		127.74	109.527				791.95	437.857	195.865	108.291				56.9706	33.5172	203.882	119.949				127.74	76.2529	109.527	65.3808
	158.74	357.505		308.777	40.5563		89.4264	101.498				158.74	87.765	357.505	197.659				308.777	181.661	40.5563	23.8603				89.4264	53.382	101.498	60.5877
	488.333	132.468		146.054	244.622		123.397	142.498				488.333	269.992	132.468	73.2396				146.054	85.927	244.622	143.917				123.397	73.6604	142.498	85.0622
	88.5269	144.983		225.267	75.1421		104.882	197.894				88.5269	48.9452	144.983	80.1588				225.267	132.53	75.1421	44.2079				104.882	62.6082	197.894	118.131
	342.48	622.99		61.3848	181.309		124.184	262.593				342.48	189.352	622.99	344.442				61.3848	36.1142	181.309	106.668				124.184	74.13	262.593	156.752
	85.2548	25.3137		135.397	181.841		267.823	118.527				85.2548	47.1361	25.3137	13.9956				135.397	79.6574	181.841	106.981				267.823	159.874	118.527	70.7532
	121.983	99.1127		394.605	241.51		99.7696	81.8112				121.983	67.4425	99.1127	54.7979				394.605	232.156	241.51	142.086				99.7696	59.5563	81.8112	48.8362
	35.1421	184.74		308.179	126.439		166.297	631.553				35.1421	19.4295	184.74	102.14				308.179	181.309	126.439	74.3869				166.297	99.2687	631.553	376.998
	228.095	146.48		331.865	376.031		147.953	122.355				228.095	126.111	146.48	80.9867				331.865	195.244	376.031	221.229				147.953	88.319	122.355	73.0385
	27.2426	116.296		106.912	165.137		105.983	89.799				27.2426	15.062	116.296	64.2986				106.912	62.8988	165.137	97.1542				105.983	63.2652	89.799	53.6044
	179.238	167.681		105.64	53.8701		139.74	55.2132				179.238	99.0978	167.681	92.7084				105.64	62.1504	53.8701	31.6931				139.74	83.4162	55.2132	32.9589
	32.0711	189.794		57.6274	35.1421		75.598	234.108				32.0711	17.7316	189.794	104.934				57.6274	33.9036	35.1421	20.675				75.598	45.1273	234.108	139.748
	119.154	67.3553		267.995	675.11		122.125	113.74				119.154	65.8786	67.3553	37.2397				267.995	157.668	675.11	397.183				122.125	72.901	113.74	67.8958
	65.1127	108.669		156.51	35.8995		223.439	166.184				65.1127	35.9998	108.669	60.0815				156.51	92.0785	35.8995	21.1206				223.439	133.379	166.184	99.2014
	515.387	203.995		90.2254	424.203		78.3553	151.167				515.387	284.95	203.995	112.786				90.2254	53.0818	424.203	249.569				78.3553	46.7733	151.167	90.237
	25.799	134.326		192.137	337.049		87.397	516.198				25.799	14.2639	134.326	74.2668				192.137	113.039	337.049	198.294				87.397	52.1706	516.198	308.138
	83.8701	156.953		63.6985	247.652		187.167	155.64				83.8701	46.3705	156.953	86.7771				63.6985	37.4754	247.652	145.7				187.167	111.727	155.64	92.9072
	23.8284	271.037		211.38	73.2548		192.137	220.752				23.8284	13.1744	271.037	149.852				211.38	124.36	73.2548	43.0976				192.137	114.694	220.752	131.775
	27.9706	156.167		104.64	342.049		169.953	134.953				27.9706	15.4645	156.167	86.3421				104.64	61.562	342.049	201.236				169.953	101.452	134.953	80.5588
	121.326	102.255		176.137	120.012		119.882	128.083				121.326	67.0793	102.255	56.5351				176.137	103.626	120.012	70.6061				119.882	71.5623	128.083	76.4578
	162.527	437.99		213.894	80.2548		108.569	57.1421				162.527	89.8587	437.99	242.158				213.894	125.839	80.2548	47.2159				108.569	64.8087	57.1421	34.1103
	290.806	410.203		252.693	114.326		435.174	121.255				290.806	160.782	410.203	226.795				252.693	148.666	114.326	67.2607				435.174	259.772	121.255	72.3816
	112.012	115.255		102.255	100.054		431.044	50.4853				112.012	61.9299	115.255	63.7226				102.255	60.159	100.054	58.8641				431.044	257.306	50.4853	30.1366
	145.439	159.154		64.2132	160.882		145.782	59.0416				145.439	80.4108	159.154	87.994				64.2132	37.7782	160.882	94.651				145.782	87.0226	59.0416	35.2442
	194.368	82.1127		96.7696	51.9411		36.799	78.3553				194.368	107.463	82.1127	45.3989				96.7696	56.9319	51.9411	30.5582				36.799	21.9667	78.3553	46.7733
	244.279	311.22		263.066	121.669		217.196	59.7696				244.279	135.058	311.22	172.069				263.066	154.768	121.669	71.5808				217.196	129.653	59.7696	35.6787
	25.1421	384.404		67.5269	152.196		117.912	292.894				25.1421	13.9007	384.404	212.531				67.5269	39.7277	152.196	89.5406				117.912	70.386	292.894	174.84
	84.0833	416.635		101.841	48.9706		95.8112	126.426				84.0833	46.4884	416.635	230.351				101.841	59.9153	48.9706	28.8106				95.8112	57.1933	126.426	75.4687
	515.973	166.882		173.953	182.693		147.841	95.7696				515.973	285.274	166.882	92.2667				173.953	102.341	182.693	107.483				147.841	88.2517	95.7696	57.1685
	307.563	112.498		129.782	42.9706		74.3553	237.368				307.563	170.047	112.498	62.1982				129.782	76.3537	42.9706	25.2807				74.3553	44.3855	237.368	141.694
	225.551	114.397		144.154	273.321		294.978	246.99				225.551	124.704	114.397	63.2484				144.154	84.8095	273.321	160.801				294.978	176.083	246.99	147.438
	751.281	286.664		74.7696	412.546		524.482	244.551				751.281	415.372	286.664	158.492				74.7696	43.9888	412.546	242.711				524.482	313.083	244.551	145.982
	269.865	295.38		136.368	65.6985		153.711	624.257				269.865	149.204	295.38	163.311				136.368	80.2283	65.6985	38.652				153.711	91.7558	624.257	372.643
	151.681	109.255		79.5269	52.9411		186.338	143.468				151.681	83.8623	109.255	60.4053				79.5269	46.7876	52.9411	31.1465				186.338	111.232	143.468	85.6415
	70.3137	239.037		186.024	157.551		39.8701	318.22				70.3137	38.8754	239.037	132.16				186.024	109.443	157.551	92.6913				39.8701	23.8	318.22	189.958
	41.799	155.024		59.1838	212.865		125.083	102.569				41.799	23.11	155.024	85.7107				59.1838	34.8193	212.865	125.234				125.083	74.667	102.569	61.227
	51.9706	137.995		49.2843	201.853		135.711	117.569				51.9706	28.7338	137.995	76.2953				49.2843	28.9952	201.853	118.755				135.711	81.0109	117.569	70.1811
	519.772	134.024		78.669	46.3848		78.5269	176.167				519.772	287.374	134.024	74.1001				78.669	46.2829	46.3848	27.2893				78.5269	46.8757	176.167	105.16
	109.468	115.569		187.137	72.4558		228.439	216.995				109.468	60.5232	115.569	63.8961				187.137	110.097	72.4558	42.6275				228.439	136.364	216.995	129.533
	74.8701	150.012		485.902	150.681		134.397	295.978				74.8701	41.3946	150.012	82.9395				485.902	285.868	150.681	88.6494				134.397	80.2267	295.978	176.68
	248.48	90.2843		647.826	58.0711		62.8701	136.012				248.48	137.381	90.2843	49.9168				647.826	381.132	58.0711	34.1646				62.8701	37.5296	136.012	81.1909
	35.3848	125.296		237.995	52.3848		181.054	157.841				35.3848	19.5637	125.296	69.2745				237.995	140.018	52.3848	30.8193				181.054	108.078	157.841	94.2211
	382.274	64.799		99.7107	128.598		90.7401	107.598				382.274	211.354	64.799	35.8264				99.7107	58.6622	128.598	75.6573				90.7401	54.1662	107.598	64.2293
	83.6985	88.598		150.184	558.227		186.208	148.912				83.6985	46.2756	88.598	48.9845				150.184	88.3568	558.227	328.419				186.208	111.155	148.912	88.8911
	141.024	162.297		140.326	155.965		146.468	163.551				141.024	77.9703	162.297	89.7313				140.326	82.5571	155.965	91.7583				146.468	87.4323	163.551	97.63
	91.9117	815.909		131.426	147.539		430.12	123.083				91.9117	50.8166	815.909	451.104				131.426	77.3214	147.539	86.8008				430.12	256.755	123.083	73.4731
	425.019	116.983		66.2548	62.1421		350.12	128.225				425.019	234.987	116.983	64.678				66.2548	38.9793	62.1421	36.5597				350.12	209	128.225	76.5426
	903.874	594.382		118.698	128.995		179.995	102.355				903.874	499.738	594.382	328.625				118.698	69.8332	128.995	75.8908				179.995	107.446	102.355	61.0998
	81.7696	85.799		112.711	308.149		29.1421	141.297				81.7696	45.2092	85.799	47.437				112.711	66.3105	308.149	181.292				29.1421	17.396	141.297	84.3453
	124.296	64.3848		67.6274	164.024		137.711	431.789				124.296	68.7217	64.3848	35.5974				67.6274	39.7868	164.024	96.4996				137.711	82.2048	431.789	257.751
	98.7696	110.569		145.196	349.203		26.8995	103.912				98.7696	54.6082	110.569	61.1317				145.196	85.4223	349.203	205.445				26.8995	16.0573	103.912	62.0288
	282.907	73.5269		241.735	124.74		129.368	81.2548				282.907	156.415	73.5269	40.6519				241.735	142.219	124.74	73.3876				129.368	77.2244	81.2548	48.5041
	659.186	37.0416		88.669	129.154		130.74	71.4264				659.186	364.454	37.0416	20.4797				88.669	52.1661	129.154	75.9846				130.74	78.0437	71.4264	42.6371
	154.338	312.35		436.245	67.799		257.38	308.392				154.338	85.3312	312.35	172.694				436.245	256.653	67.799	39.8878				257.38	153.64	308.392	184.091
	110.355	110.284		405.948	81.0416		74.0416	82.1421				110.355	61.0138	110.284	60.9745				405.948	238.829	81.0416	47.6787				74.0416	44.1982	82.1421	49.0337
	168.38	546.073		140.255	99.5685		178.894	141.51				168.38	93.0946	546.073	301.916				140.255	82.5153	99.5685	58.5786				178.894	106.789	141.51	84.4725
	97.0833	172.468		16.8995	296.321		84.669	38.6274				97.0833	53.6759	172.468	95.355				16.8995	9.94239	296.321	174.333				84.669	50.5421	38.6274	23.0582
	94.8112	140.752		104.527	160.095		121.368	182.539				94.8112	52.4197	140.752	77.8198				104.527	61.4957	160.095	94.1881				121.368	72.4489	182.539	108.965
	20.8995	148.024		145.498	683.713		151.811	97.0538				20.8995	11.555	148.024	81.8405				145.498	85.5997	683.713	402.245				151.811	90.6219	97.0538	57.9351
	23.8995	168.853		88.4264	254.622		68.2132	97.2548				23.8995	13.2137	168.853	93.3562				88.4264	52.0234	254.622	149.801				68.2132	40.7191	97.2548	58.0551
	87.0122	161.953		149.225	200.196		243.421	260.551				87.0122	48.1077	161.953	89.5415				149.225	87.7929	200.196	117.78				243.421	145.307	260.551	155.533
	381.161	317.421		125.941	381.848		226.551	65.8701				381.161	210.738	317.421	175.498				125.941	74.0942	381.848	224.65				226.551	135.237	65.8701	39.3204
	99.4264	101.669		271.108	126.569		23.3137	110.811				99.4264	54.9714	101.669	56.2113				271.108	159.499	126.569	74.4633				23.3137	13.9168	110.811	66.1474
	131.468	72.1127		121.083	106.355		153.581	59.9411				131.468	72.6867	72.1127	39.87				121.083	71.2363	106.355	62.5714				153.581	91.6782	59.9411	35.7811
	125.125	67.0416		197.581	352.279		76.4975	203.095				125.125	69.1797	67.0416	37.0663				197.581	116.242	352.279	207.254				76.4975	45.6643	203.095	121.235
	155.238	64.8701		123.498	178.024		271.593	491.056				155.238	85.8285	64.8701	35.8657				123.498	72.6566	178.024	104.736				271.593	162.124	491.056	293.13
	109.054	56.8701		76.0122	57.6985		134.51	148.468				109.054	60.2942	56.8701	31.4426				76.0122	44.7198	57.6985	33.9454				134.51	80.294	148.468	88.6262
	104.355			185.066	286.635		80.4264	353.764				104.355	57.6965						185.066	108.879	286.635	168.634				80.4264	48.0096	353.764	211.175
	30.3137			195.693	170.196		378.233	387.179				30.3137	16.76						195.693	115.131	170.196	100.13				378.233	225.781	387.179	231.122
	121.853			153.154	150.811		63.2132	252.451				121.853	67.3706						153.154	90.1044	150.811	88.7259				63.2132	37.7344	252.451	150.697
	146.64			386.576	331.794		141.61	151.581				146.64	81.0748						386.576	227.432	331.794	195.202				141.61	84.5325	151.581	90.4843
	130.167			107.113	101.74		269.865	94.4558				130.167	71.9671						107.113	63.017	101.74	59.8562				269.865	161.093	94.4558	56.3843
	800.713			199.569	78.6274		58.6274	230.238				800.713	442.702						199.569	117.411	78.6274	46.2584				58.6274	34.9969	230.238	137.438
	127.296			132.297	282.166		170.054	110.184				127.296	70.3803						132.297	77.8333	282.166	166.005				170.054	101.512	110.184	65.7729
	166.397			88.8406	119.426		127.953	122.012				166.397	91.9984						88.8406	52.2671	119.426	70.2615				127.953	76.3802	122.012	72.8337
	51.6274			271.007	260.22		434.274	101.439				51.6274	28.544						271.007	159.44	260.22	153.094				434.274	259.235	101.439	60.5526
	74.6985			102.74	115.627		265.492	158.083				74.6985	41.2997						102.74	60.4445	115.627	68.0264				265.492	158.483	158.083	94.3659
	165.752			154.397	294.149		154.196	84.7696				165.752	91.642						154.397	90.8355	294.149	173.055				154.196	92.0455	84.7696	50.6022
	167.782			121.326	177.054		188.551	186.196				167.782	92.764						121.326	71.379	177.054	104.165				188.551	112.553	186.196	111.147
	94.598			116.426	160.054		933.389	167.439				94.598	52.3018						116.426	68.4965	160.054	94.1636				933.389	557.175	167.439	99.9505
	199.024			108.598	179.74		481.884	127.882				199.024	110.038						108.598	63.8909	179.74	105.745				481.884	287.655	127.882	76.3378
	32.4558			187.48	347.09		94.669	116.426				32.4558	17.9443						187.48	110.299	347.09	204.202				94.669	56.5115	116.426	69.4993
	129.882			218.137	139.77		78.4975	158.965				129.882	71.81						218.137	128.335	139.77	82.2299				78.4975	46.8581	158.965	94.8926
	118.468			143.995	148.995		181.681	38.799				118.468	65.4992						143.995	84.7157	148.995	87.6573				181.681	108.452	38.799	23.1606
	49.8701			140.51	56.3553		117.024	36.6274				49.8701	27.5724						140.51	82.6653	56.3553	33.1552				117.024	69.8563	36.6274	21.8643
	150.12			101.184	588.931		180.368	119.426				150.12	82.9991						101.184	59.5289	588.931	346.482				180.368	107.668	119.426	71.2902
	104.426			103.042	239.924		229.907	174.51				104.426	57.7358						103.042	60.6219	239.924	141.153				229.907	137.24	174.51	104.171
	117.054			83.4264	244.965		189.238	66.9411				117.054	64.7173						83.4264	49.0818	244.965	144.119				189.238	112.963	66.9411	39.9597
	135.521			113.61	502.83		101.326	232.882				135.521	74.9276						113.61	66.8397	502.83	295.827				101.326	60.4853	232.882	139.016
	96.1241			574.902	166.054		89.1838	250.321				96.1241	53.1456						574.902	338.229	166.054	97.6935				89.1838	53.2372	250.321	149.426
culture 3	104.439	163.983	culture 3	18.0711	48.2132	culture 3	211.338	322.392	culture 3	mean KO EFGP ctrl	169.313	104.439	61.6836	163.983	96.8516	culture 3	mean KO C4 ctrl	78.3562	18.0711	23.0628	48.2132	61.5308	culture 3	mean KO C4-D103ctrl	166.692	211.338	126.783	322.392	193.405
	143.154	422.919		57.6274	50.1127		153.439	49.8701		mean normalized KO EGFP ctrl	100	143.154	84.5499	422.919	249.785		mean normalized KO C4 ctrl	100	57.6274	73.5454	50.1127	63.955		mean normalized KO C4-D103 ctrl	100	153.439	92.049	49.8701	29.9174
	184.083	171.64		183.723	464.031		173.309	167.338		mean normalized KO C4ctrl	111.124	184.083	108.723	171.64	101.374		mean normalized KOC4sema3E	148.562	183.723	234.471	464.031	592.208		mean normalized KO C4-D103 sema3E	106.708	173.309	103.969	167.338	100.387
	445.931	127.255		30.3848	54.3848		211.823	66.6274				445.931	263.376	127.255	75.1593				30.3848	38.7778	54.3848	69.4071				211.823	127.074	66.6274	39.9703
	519.931	337.706		36.6274	42.5563		111.083	47.799				519.931	307.082	337.706	199.456				36.6274	46.7447	42.5563	54.3113				111.083	66.6397	47.799	28.675
	137.782	200.924		62.1127	53.5269		176.338	106.669				137.782	81.3767	200.924	118.67				62.1127	79.2696	53.5269	68.3123				176.338	105.787	106.669	63.9915
	76.7696	118.397		48.5563	211.823		134.569	116.225				76.7696	45.3417	118.397	69.9277				48.5563	61.9687	211.823	270.334				134.569	80.7286	116.225	69.7245
	181.853	264.522		32.6274	63.6985		105.983	176.167				181.853	107.406	264.522	156.232				32.6274	41.6398	63.6985	81.2935				105.983	63.5799	176.167	105.684
	182.551	605.855		38.7279	305.605		237.593	252.451				182.551	107.819	605.855	357.83				38.7279	49.4254	305.605	390.02				237.593	142.534	252.451	151.447
	63.598	351.492		17.3137	85.598		111.882	48.0416				63.598	37.5623	351.492	207.599				17.3137	22.0961	85.598	109.242				111.882	67.119	48.0416	28.8205
	161.208	56.2132		119.811	20.0711		113.882	198.823				161.208	95.2129	56.2132	33.2007				119.811	152.906	20.0711	25.6152				113.882	68.3188	198.823	119.276
	148.267	57.4558		40.3137	125.196		118.841	83.5269				148.267	87.5695	57.4558	33.9346				40.3137	51.4493	125.196	159.778				118.841	71.2934	83.5269	50.1084
	49.5563	253.321		29.799	136.983		204.539	150.154				49.5563	29.269	253.321	149.617				29.799	38.0302	136.983	174.821				204.539	122.705	150.154	90.0787
	143.439	48.0416		73.6274	57.7696		75.4558	81.9117				143.439	84.7178	48.0416	28.3744				73.6274	93.965	57.7696	73.7269				75.4558	45.2665	81.9117	49.1394
	57.1127	136.054		173.995	19.3137		214.664	470.659				57.1127	33.7319	136.054	80.3562				173.995	222.056	19.3137	24.6486				214.664	128.779	470.659	282.352
	155.225	142.012		72.0416	233.735		155.125	69.2132				155.225	91.6793	142.012	83.8753				72.0416	91.9411	233.735	298.298				155.125	93.0606	69.2132	41.5215
	284.735	204.338		87.4264	113.397		65.7696	66.9411				284.735	168.17	204.338	120.686				87.4264	111.576	113.397	144.72				65.7696	39.4557	66.9411	40.1585
	428.789	63.7401		185.853	175.024		191.267	147.841				428.789	253.252	63.7401	37.6462				185.853	237.19	175.024	223.37				191.267	114.743	147.841	88.6907
	84.8406	155.782		90.1127	72.4264		148.338	75.7401				84.8406	50.1086	155.782	92.0079				90.1127	115.004	72.4264	92.4322				148.338	88.9891	75.7401	45.4371
	80.598	167.569		58.3553	359.747		110.811	409.304				80.598	47.6028	167.569	98.9694				58.3553	74.4744	359.747	459.118				110.811	66.4765	409.304	245.544
	66.1421	207.238		111.953	63.669		135.368	87.4975				66.1421	39.0649	207.238	122.399				111.953	142.877	63.669	81.2558				135.368	81.208	87.4975	52.4904
	72.0416	256.208		24.5563	191.368		185.811	116.397				72.0416	42.5492	256.208	151.322				24.5563	31.3393	191.368	244.228				185.811	111.47	116.397	69.8274
	77.7279	151.782		93.2254	76.4264		199.841	123.296				77.7279	45.9077	151.782	89.6454				93.2254	118.976	76.4264	97.5371				199.841	119.886	123.296	73.9665
	215.48	51.3848		90.4975	184.267		237.007	164.267				215.48	127.267	51.3848	30.3489				90.4975	115.495	184.267	235.166				237.007	142.182	164.267	98.545
	49.8701	84.5685		291.894	59.6985		118.953	276.007				49.8701	29.4543	84.5685	49.9479				291.894	372.522	59.6985	76.1886				118.953	71.361	276.007	165.579
	48.3848	133.782		126.983	107.669		94.4264	287.321				48.3848	28.5771	133.782	79.0142				126.983	162.058	107.669	137.41				94.4264	56.6471	287.321	172.366
	121.355	396.475		53.9706	327.463		286.907	358.99				121.355	71.6749	396.475	234.166				53.9706	68.8785	327.463	417.916				286.907	172.117	358.99	215.361
	279.25	71.8406		35.7279	42.6274		201.924	109.953				279.25	164.931	71.8406	42.4305				35.7279	45.5968	42.6274	54.4021				201.924	121.136	109.953	65.9618
	139.225	47.0416		93.3259	139.64		484.085	67.3137				139.225	82.2294	47.0416	27.7837				93.3259	119.105	139.64	178.211				484.085	290.406	67.3137	40.382
	225.965	138.569		133.912	94.0833		45.9706	192.024				225.965	133.46	138.569	81.8414				133.912	170.901	94.0833	120.071				45.9706	27.5781	192.024	115.197
	119.527	263.208		25.7279	80.3553		149.752	81.5269				119.527	70.595	263.208	155.456				25.7279	32.8345	80.3553	102.551				149.752	89.8375	81.5269	48.9086
	208.392	140.297		142.882	94.9117		80.3553	72.5269				208.392	123.081	140.297	82.862				142.882	182.35	94.9117	121.128				80.3553	48.2057	72.5269	43.5094
	73.669	51.6985		23.1421	41.2132		41.6274	87.9828				73.669	43.5104	51.6985	30.5342				23.1421	29.5345	41.2132	52.5972				41.6274	24.9726	87.9828	52.7815
	155.581	193.794		107.225	252.652		293.522	163.539				155.581	91.8892	193.794	114.459				107.225	136.844	252.652	322.44				293.522	176.086	163.539	98.1083
	161.983	188.167		144.297	113.368		85.397	131.569				161.983	95.6704	188.167	111.135				144.297	184.154	113.368	144.682				85.397	51.2303	131.569	78.9289
	625.742	234.551		47.8701	35.3848		139.983	76.5269				625.742	369.576	234.551	138.531				47.8701	61.0929	35.3848	45.1589				139.983	83.9767	76.5269	45.9091
	109.569	64.4264		28.1421	49.9411		113.326	78.1838				109.569	64.7134	64.4264	38.0516				28.1421	35.9156	49.9411	63.736				113.326	67.9851	78.1838	46.903
	143.539	111.225		85.7401	101.77		73.7696	92.4975				143.539	84.7771	111.225	65.692				85.7401	109.423	101.77	129.881				73.7696	44.2549	92.4975	55.4899
	130.024	164.853		39.8701	42.4558		81.8701	790.465				130.024	76.7951	164.853	97.3654				39.8701	50.8831	42.4558	54.1831				81.8701	49.1145	790.465	474.206
	23.4853	121.711		71.1127	50.1421		221.439	104.012				23.4853	13.8709	121.711	71.8848				71.1127	90.7557	50.1421	63.9925				221.439	132.843	104.012	62.3977
	99.9828	67.8406		45.799	66.3553		177.137	108.669				99.9828	59.0519	67.8406	40.0681				45.799	58.4497	66.3553	84.6842				177.137	106.266	108.669	65.1913
	86.5269	130.669		222.622	45.4558		46.9706	65.5563				86.5269	51.1046	130.669	77.1758				222.622	284.116	45.4558	58.0117				46.9706	28.178	65.5563	39.3277
	541.044	207.652		57.8406	198.681		163.681	142.841				541.044	319.552	207.652	122.643				57.8406	73.8175	198.681	253.561				163.681	98.1936	142.841	85.6911
	39.2132	154.953		222.61	126.225		364.789	58.9706				39.2132	23.1601	154.953	91.5186				222.61	284.1	126.225	161.092				364.789	218.84	58.9706	35.3769
	256.166	228.593		45.3848	207.551		107.627	135.882				256.166	151.297	228.593	135.012				45.3848	57.9211	207.551	264.882				107.627	64.5665	135.882	81.5168
	53.799	151.326		68.5269	68.7696		26.799	56.6985				53.799	31.7748	151.326	89.3762				68.5269	87.4556	68.7696	87.7653				26.799	16.0769	56.6985	34.0139
	53.6985	318.421		104.184	174.267		81.4975	270.853				53.6985	31.7154	318.421	188.066				104.184	132.962	174.267	222.404				81.4975	48.891	270.853	162.487
	112.912	71.6985		31.2132	69.7696		47.2843	72.7696				112.912	66.688	71.6985	42.3466				31.2132	39.835	69.7696	89.0416				47.2843	28.3662	72.7696	43.655
	156.622	77.2843		57.0416	59.0122		67.1127	159.083				156.622	92.5044	77.2843	45.6457				57.0416	72.7978	59.0122	75.3127				67.1127	40.2614	159.083	95.4353
	324.09	149.095		250.208	37.0416		99.7401	492.375				324.09	191.414	149.095	88.0589				250.208	319.321	37.0416	47.2733				99.7401	59.8348	492.375	295.379
	169.48	480.103		180.652	120.225		178.556	81.2132				169.48	100.098	480.103	283.558				180.652	230.552	120.225	153.434				178.556	107.117	81.2132	48.7204
	117.225	421.546		57.799	85.598		90.7401	191.752				117.225	69.2357	421.546	248.974				57.799	73.7644	85.598	109.242				90.7401	54.4357	191.752	115.034
	129.498	126.468		33.5563	111.196		65.598	144.024				129.498	76.4839	126.468	74.6946				33.5563	42.8253	111.196	141.911				65.598	39.3527	144.024	86.4013
	91.397	189.581		217.681	102.355		96.6396	119.841				91.397	53.9809	189.581	111.97				217.681	277.81	102.355	130.628				96.6396	57.9748	119.841	71.8933
	69.0122	86.8701		53.6274	236.309		116.882	157.953				69.0122	40.76	86.8701	51.3073				53.6274	68.4405	236.309	301.583				116.882	70.1186	157.953	94.7574
	179.397	103.296		21.7279	86.1838		192.498	81.1127				179.397	105.956	103.296	61.009				21.7279	27.7296	86.1838	109.99				192.498	115.481	81.1127	48.6601
	69.3553	211.681		60.7696	64.8701		58.2843	141.083				69.3553	40.9627	211.681	125.023				60.7696	77.5556	64.8701	82.7887				58.2843	34.9652	141.083	84.6369
	62.3137	54.0416		136.882	218.823		85.669	127.811				62.3137	36.8037	54.0416	31.9181				136.882	174.692	218.823	279.267				85.669	51.3935	127.811	76.6749
	102.983	122.054		41.3848	92.1127		96.0416	435.262				102.983	60.8238	122.054	72.0875				41.3848	52.8162	92.1127	117.556				96.0416	57.6161	435.262	261.117
	61.3553	116.296		44.9706	32.3848		157.167	144.368				61.3553	36.2377	116.296	68.6871				44.9706	57.3925	32.3848	41.3302				157.167	94.2854	144.368	86.6071
	35.799	67.2132		63.1127	106.184		51.6274	74.4264				35.799	21.1436	67.2132	39.6975				63.1127	80.5459	106.184	135.514				51.6274	30.9717	74.4264	44.649
	117.698	110.012		274.735	50.598		358.291	59.5269				117.698	69.5151	110.012	64.9755				274.735	350.623	50.598	64.5743				358.291	214.942	59.5269	35.7106
	191.208	74.1543		166.995	146.882		65.0122	387.647				191.208	112.931	74.1543	43.7971				166.995	213.123	146.882	187.455				65.0122	39.0013	387.647	232.552
	146.882	179.238		38.1421	69.7696		145.154	225.894				146.882	86.7517	179.238	105.861				38.1421	48.6778	69.7696	89.0416				145.154	87.0791	225.894	135.516
	77.1838	117.397		282.823	44.4558		96.8112	88.1127				77.1838	45.5863	117.397	69.3371				282.823	360.946	44.4558	56.7355				96.8112	58.0778	88.1127	52.8595
	70.0416	90.2843		462.345	155.125		120.385	124.74				70.0416	41.368	90.2843	53.3238				462.345	590.056	155.125	197.974				120.385	72.2197	124.74	74.8325
	124.811	166.752		162.225	37.9706		135.912	85.7696				124.811	73.7161	166.752	98.4873				162.225	207.036	37.9706	48.4589				135.912	81.5344	85.7696	51.4538
	74.1838	60.669		317.563	104.083		76.598	53.3553				74.1838	43.8145	60.669	35.8324				317.563	405.282	104.083	132.833				76.598	45.9517	53.3553	32.0082
	137.297	585.387		43.5563	60.7696		198.38	137.368				137.297	81.0901	585.387	345.742				43.5563	55.5875	60.7696	77.5556				198.38	119.009	137.368	82.4078
	39.8701	200.581		62.0416	72.0122		100.698	129.539				39.8701	23.5481	200.581	118.467				62.0416	79.1789	72.0122	91.9036				100.698	60.4098	129.539	77.7115
	60.7696	102.426		65.7401	180.267		69.4558	96.9411				60.7696	35.8918	102.426	60.4951				65.7401	83.899	180.267	230.061				69.4558	41.6671	96.9411	58.1557
	321.936	150.012		304.078	126.64		59.5563	48.0416				321.936	190.142	150.012	88.6003				304.078	388.072	126.64	161.62				59.5563	35.7283	48.0416	28.8205
	526.63	94.397		65.2548	106.841		172.51	485.701				526.63	311.038	94.397	55.7528				65.2548	83.2797	106.841	136.352				172.51	103.49	485.701	291.375
	168.965	277.966		162.924	131.426		91.8823	85.8701				168.965	99.7945	277.966	164.172				162.924	207.927	131.426	167.729				91.8823	55.1209	85.8701	51.5141
	41.8995	113.456		89.0122	51.4558		206.48	400.605				41.8995	24.7467	113.456	67.0093				89.0122	113.599	51.4558	65.6691				206.48	123.869	400.605	240.326
	58.9706	101.498		104.841	58.1421		108.113	121.154				58.9706	34.8292	101.498	59.9465				104.841	133.8	58.1421	74.2023				108.113	64.8576	121.154	72.6814
	178.368	159.397		54.9706	214.309		322.037	423.375				178.368	105.348	159.397	94.1431				54.9706	70.1547	214.309	273.506				322.037	193.192	423.375	253.986
	87.669	108.154		47.0416	109.569		80.4264	441.718				87.669	51.7791	108.154	63.8781				47.0416	60.0356	109.569	139.834				80.4264	48.2484	441.718	264.99
	650.683	140.527		85.1838	69.6985		176.74	127.61				650.683	384.307	140.527	82.9981				85.1838	108.714	69.6985	88.9508				176.74	106.028	127.61	76.5543
	474.973	58.3848		20.0711	78.5269		220.865	51.9706				474.973	280.529	58.3848	34.4833				20.0711	25.6152	78.5269	100.218				220.865	132.499	51.9706	31.1776
	236.936	151.196		44.2843	318.693		303.782	92.2548				236.936	139.939	151.196	89.2995				44.2843	56.5166	318.693	406.724				303.782	182.241	92.2548	55.3443
	249.593	133.468		299.718	110.054		305.304	187.894				249.593	147.415	133.468	78.8289				299.718	382.507	110.054	140.453				305.304	183.154	187.894	112.719
	119.924	279.652		26.3137	218.48		50.598	762.34				119.924	70.8295	279.652	165.168				26.3137	33.5821	218.48	278.829				50.598	30.3541	762.34	457.334
	96.8823	156.368		74.4264	238.409		156.125	94.598				96.8823	57.2207	156.368	92.3539				74.4264	94.9847	238.409	304.263				156.125	93.6605	94.598	56.75
	42.9706	359.635		39.0711	348.706		159.841	98.8406				42.9706	25.3793	359.635	212.408				39.0711	49.8634	348.706	445.026				159.841	95.8896	98.8406	59.2952
	34.2132	215.853		88.0833	65.0122		218.024	61.1838				34.2132	20.207	215.853	127.487				88.0833	112.414	65.0122	82.9701				218.024	130.794	61.1838	36.7046
	108.77	86.8112		107.426	46.4558		90.2254	260.108				108.77	64.2416	86.8112	51.2725				107.426	137.1	46.4558	59.288				90.2254	54.1269	260.108	156.04
	114.184	131.297		51.6985	25.8284		75.3259	172.267				114.184	67.4393	131.297	77.5464				51.6985	65.9788	25.8284	32.9628				75.3259	45.1886	172.267	103.344
	25.0711	396.576		34.4853	344.22		77.2132	70.9706				25.0711	14.8075	396.576	234.226				34.4853	44.0109	344.22	439.302				77.2132	46.3208	70.9706	42.5758
	169.125	106.498		49.1127	122.054		53.3259	135.225				169.125	99.8886	106.498	62.8996				49.1127	62.6788	122.054	155.768				53.3259	31.9906	135.225	81.1227
	204.297	98.0833		28.9706	54.7696		123.782	778.548				204.297	120.662	98.0833	57.93				28.9706	36.9729	54.7696	69.8982				123.782	74.2576	778.548	467.057
	120.912	155.439		19.2426	134.853		104.054	388.274				120.912	71.4129	155.439	91.8052				19.2426	24.5578	134.853	172.102				104.054	62.4227	388.274	232.929
	95.7696	340.161		53.4558	118.74		90.196	91.7696				95.7696	56.5635	340.161	200.906				53.4558	68.2215	118.74	151.539				90.196	54.1093	91.7696	55.0533
	363.806	166.024		61.4558	83.1127		120.698	85.6396				363.806	214.871	166.024	98.0574				61.4558	78.4313	83.1127	106.07				120.698	72.4079	85.6396	51.3758
	182.137	65.2843		66.9411	150.125		99.9411	223.693				182.137	107.574	65.2843	38.5582				66.9411	85.4318	150.125	191.593				99.9411	59.9554	223.693	134.195
	169.782	203.811		203.652	32.5563		153.167	36.2132				169.782	100.277	203.811	120.375				203.652	259.905	32.5563	41.5491				153.167	91.8857	36.2132	21.7246
	255.35	167.267		28.7279	54.2843		233.794	190.64				255.35	150.815	167.267	98.7913				28.7279	36.6632	54.2843	69.2789				233.794	140.255	190.64	114.366
	93.0122	152.539		40.3848	21.3137		64.0416	89.4558				93.0122	54.9349	152.539	90.0927				40.3848	51.54	21.3137	27.201				64.0416	38.419	89.4558	53.6652
	342.321	168.681		74.6985	51.799		304.534	45.6274				342.321	202.182	168.681	99.6266				74.6985	95.3319	51.799	66.1071				304.534	182.692	45.6274	27.3722
	263.723	88.8406		46.799	191.368		28.7279	39.0711				263.723	155.76	88.8406	52.4711				46.799	59.726	191.368	244.228				28.7279	17.2341	39.0711	23.439
	104.74	147.941		55.8701	80.7696		222.74	148.924				104.74	61.8617	147.941	87.377				55.8701	71.3027	80.7696	103.08				222.74	133.623	148.924	89.3406
	142.811	111.196		84.5269	66.6985		128.054	77.9411				142.811	84.3472	111.196	65.6746				84.5269	107.875	66.6985	85.1222				128.054	76.8204	77.9411	46.7574
	269.865	240.652		27.8995	114.426		47.7279	97.2843				269.865	159.388	240.652	142.134				27.8995	35.606	114.426	146.034				47.7279	28.6323	97.2843	58.3616
	119.698	128.598		49.1127	66.2843		115.498	108.284				119.698	70.6964	128.598	75.9526				49.1127	62.6788	66.2843	84.5935				115.498	69.2878	108.284	64.9606
	499.328	637.772		145.782	100.083		96.1543	113.811				499.328	294.913	637.772	376.681				145.782	186.05	100.083	127.729				96.1543	57.6837	113.811	68.2762
	162.125	62.4558		106.983	86.4264		134.468	218.409				162.125	95.7543	62.4558	36.8877				106.983	136.534	86.4264	110.299				134.468	80.6684	218.409	131.025
	393.007	409.363		102.355	76.9117		133.539	469.961				393.007	232.118	409.363	241.778				102.355	130.628	76.9117	98.1565				133.539	80.1111	469.961	281.933
	166.681	112.326		78.8406	105.326		214.137	183.095				166.681	98.4453	112.326	66.342				78.8406	100.618	105.326	134.419				214.137	128.462	183.095	109.84
	37.1421	179.782		57.2843	49.4558		90.8406	80.1543				37.1421	21.9369	179.782	106.183				57.2843	73.1075	49.4558	63.1166				90.8406	54.496	80.1543	48.0852
	200.995	90.0833		238.409	61.2132		149.095	53.799				200.995	118.712	90.0833	53.205				238.409	304.263	61.2132	78.1217				149.095	89.4435	53.799	32.2744
	226.953	53.6985		98.9828	111.912		124.296	125.983				226.953	134.043	53.6985	31.7154				98.9828	126.324	111.912	142.824				124.296	74.5664	125.983	75.578
	156.267	151.439		53.6985	198.167		94.7817	113.527				156.267	92.2945	151.439	89.4427				53.6985	68.5313	198.167	252.905				94.7817	56.8602	113.527	68.1056
	32.3137	197.51		96.1127	60.0416		164.61	41.9706				32.3137	19.0851	197.51	116.653				96.1127	122.661	60.0416	76.6265				164.61	98.7509	41.9706	25.1785
	179.48	184.74		67.7696	22.4853		99.1838	98.7696				179.48	106.005	184.74	109.111				67.7696	86.4891	22.4853	28.6963				99.1838	59.5011	98.7696	59.2526
	177.368	447.161		48.799	98.8823		166.368	301.25				177.368	104.757	447.161	264.103				48.799	62.2784	98.8823	126.196				166.368	99.8051	301.25	180.722
	211.652	78.4264		128.782	52.2843		123.539	78.3848				211.652	125.006	78.4264	46.3202				128.782	164.354	52.2843	66.7264				123.539	74.112	78.3848	47.0236
	119.468	99.5685		307.522	74.1127		169.598	115.296				119.468	70.5603	99.5685	58.8072				307.522	392.466	74.1127	94.5843				169.598	101.743	115.296	69.1672
	104.397	127.368		31.799	79.3259		105.74	770.021				104.397	61.659	127.368	75.2259				31.799	40.5826	79.3259	101.238				105.74	63.4343	770.021	461.942
	208.309	102.669		315.936	56.0122		168.882	142.397				208.309	123.031	102.669	60.6384				315.936	403.205	56.0122	71.4841				168.882	101.314	142.397	85.425
	90.0416	504.274		243.38	112.296		79.6274	112.983				90.0416	53.1804	504.274	297.835				243.38	310.607	112.296	143.315				79.6274	47.7691	112.983	67.7792
	172.51	61.3848		33.1421	66.4975		150.551	74.6985				172.51	101.888	61.3848	36.2551				33.1421	42.2967	66.4975	84.8656				150.551	90.3168	74.6985	44.8122
	85.9117	113.296		250.522	74.9411		88.8112	84.6274				85.9117	50.7412	113.296	66.9152				250.522	319.722	74.9411	95.6415				88.8112	53.2785	84.6274	50.7686
	127.255	252.806		125.154	105.669		148.782	23.2426				127.255	75.1593	252.806	149.312				125.154	159.725	105.669	134.857				148.782	89.2553	23.2426	13.9434
	37.7279	142.095		46.5563	84.3259		277.196	74.1838				37.7279	22.2829	142.095	83.9245				46.5563	59.4162	84.3259	107.619				277.196	166.292	74.1838	44.5034
	122.983	164.983		65.0416	59.6274		180.64	123.811				122.983	72.6362	164.983	97.4422				65.0416	83.0076	59.6274	76.0979				180.64	108.367	123.811	74.2753
	52.3553	104.669		43.1421	114.225		198.439	187.368				52.3553	30.9221	104.669	61.8197				43.1421	55.0589	114.225	145.777				198.439	119.045	187.368	112.403
	156.267	174.853		48.5563	174.368		157.054	147.61				156.267	92.2945	174.853	103.272				48.5563	61.9687	174.368	222.532				157.054	94.2177	147.61	88.5525
	80.2132	159.581		56.8995	87.9828		123.811	116.882				80.2132	47.3756	159.581	94.2516				56.8995	72.6164	87.9828	112.286				123.811	74.2753	116.882	70.1186
	128.669	112.912		47.1421	204.095		121.154	119.024				128.669	75.9946	112.912	66.688				47.1421	60.1638	204.095	260.471				121.154	72.6814	119.024	71.4036
	113.983	201.711		73.1127	81.4558		196.87	157.439				113.983	67.3206	201.711	119.134				73.1127	93.3081	81.4558	103.956				196.87	118.104	157.439	94.4486
	136.953	113.498		77.5269	45.4558		90.4975	240.877				136.953	80.8874	113.498	67.034				77.5269	98.9416	45.4558	58.0117				90.4975	54.2901	240.877	144.504
	104.912	295.534		224.823	86.2843		171.439	248.338				104.912	61.963	295.534	174.549				224.823	286.925	86.2843	110.118				171.439	102.847	248.338	148.98
	71.7696	109.326		79.5269	195.338		81.3848	390.747				71.7696	42.3886	109.326	64.5701				79.5269	101.494	195.338	249.295				81.3848	48.8233	390.747	234.412
	90.9411	148.012		137.64	46.1127		290.848	53.4558				90.9411	53.7117	148.012	87.419				137.64	175.659	46.1127	58.8501				290.848	174.482	53.4558	32.0685
	136.782	115.569		49.3137	48.6274		140.154	76.4264				136.782	80.7861	115.569	68.2571				49.3137	62.9353	48.6274	62.0594				140.154	84.0796	76.4264	45.8488
	134.368	475.772		27.799	43.6985		256.836	152.255				134.368	79.3602	475.772	281				27.799	35.4777	43.6985	55.769				256.836	154.078	152.255	91.3388
	184.711	172.569		88.5269	66.0416		37.3137	393.676				184.711	109.094	172.569	101.922				88.5269	112.98	66.0416	84.2838				37.3137	22.3848	393.676	236.169
	35.3137	333.492		44.6274	35.2132		190.196	99.598				35.3137	20.857	333.492	196.967				44.6274	56.9545	35.2132	44.9399				190.196	114.1	99.598	59.7496
	78.2548	102.912		75.8701	63.598		126.569	93.397				78.2548	46.2189	102.912	60.7818				75.8701	96.8272	63.598	81.1652				126.569	75.9294	93.397	56.0296
	218.066	86.9117		25.3137	159.853		238.948	76.3553				218.066	128.794	86.9117	51.3318				25.3137	32.3059	159.853	204.008				238.948	143.347	76.3553	45.8061
	190.581	133.912		53.9706	60.6985		107.125	208.64				190.581	112.561	133.912	79.091				53.9706	68.8785	60.6985	77.4648				107.125	64.265	208.64	125.164
	92.8406	75.2843		18.4853	15.8995		159.326	202.794				92.8406	54.8336	75.2843	44.4645				18.4853	23.5914	15.8995	20.2913				159.326	95.5808	202.794	121.658
	115.154	38.2132		51.5269	22.6569		252.451	164.024				115.154	68.0125	38.2132	22.5695				51.5269	65.7598	22.6569	28.9153				252.451	151.447	164.024	98.3995
	239.865	118.569		28.1421	102.326		50.4558	109.225				239.865	141.669	118.569	70.029				28.1421	35.9156	102.326	130.591				50.4558	30.2688	109.225	65.5251
	111.64	127.426		167.539	128.154		235.965	131.326				111.64	65.9366	127.426	75.2606				167.539	213.817	128.154	163.553				235.965	141.557	131.326	78.7834
	25.3137	84.5269		31.3848	173.752		218.936	85.5269				25.3137	14.9508	84.5269	49.9233				31.3848	40.054	173.752	221.747				218.936	131.341	85.5269	51.3082
	93.669	566.014		28.1421	89.598		42.799	90.1543				93.669	55.3228	566.014	334.3				28.1421	35.9156	89.598	114.347				42.799	25.6754	90.1543	54.0842
	185.782	34.5563		41.1421	47.2132		155.48	73.4264				185.782	109.726	34.5563	20.4097				41.1421	52.5065	47.2132	60.2546				155.48	93.2737	73.4264	44.049
	74.1127	149.912		210.066	156.167		99.8112	49.0711				74.1127	43.7725	149.912	88.5409				210.066	268.091	156.167	199.303				99.8112	59.8775	49.0711	29.4381
	124.569	31.8995		44.0416	170.338		120.983	63.8701				124.569	73.5727	31.8995	18.8405				44.0416	56.2069	170.338	217.389				120.983	72.5785	63.8701	38.3161
	451.433	297.166		30.5563	40.9411		201.711	827.269				451.433	266.626	297.166	175.513				30.5563	38.9966	40.9411	52.25				201.711	121.008	827.269	496.285
	77.1127	215.095		36.3848	60.3553		109.669	415.233				77.1127	45.5443	215.095	127.04				36.3848	46.4351	60.3553	77.0268				109.669	65.7913	415.233	249.101
	248.723	143.711		32.6569	50.2843		75.6274	259.51				248.723	146.901	143.711	84.8785				32.6569	41.6775	50.2843	64.174				75.6274	45.3694	259.51	155.682
	29.9706	87.2254		125.61	105.397		363.777	322.735				29.9706	17.7013	87.2254	51.5171				125.61	160.307	105.397	134.51				363.777	218.232	322.735	193.611
	146.326	98.9828		58.2843	72.5269		157.095	370.321				146.326	86.4231	98.9828	58.4613				58.2843	74.3838	72.5269	92.5605				157.095	94.2428	370.321	222.158
	77.598	91.669		32.9706	252.421		136.012	214.61				77.598	45.831	91.669	54.1416				32.9706	42.0778	252.421	322.146				136.012	81.5947	214.61	128.746
	110.296	366.546		70.1421	256.894		148.083	105.698				110.296	65.1434	366.546	216.49				70.1421	89.517	256.894	327.855				148.083	88.8363	105.698	63.4093
	125.225	149.095		35.9706	35.0416		43.0416	195.095				125.225	73.9607	149.095	88.0589				35.9706	45.9065	35.0416	44.7209				43.0416	25.821	195.095	117.039
	59.799	197.125		36.9706	29.4558		271.794	79.9411				59.799	35.3185	197.125	116.426				36.9706	47.1827	29.4558	37.5922				271.794	163.051	79.9411	47.9573
	578.014	95.9828		62.1127	158.64		161.61	46.2426				578.014	341.387	95.9828	56.6894				62.1127	79.2696	158.64	202.459				161.61	96.9512	46.2426	27.7413
	282.38	368.546		45.799	82.9411		52.1421	146.095				282.38	166.779	368.546	217.671				45.799	58.4497	82.9411	105.851				52.1421	31.2804	146.095	87.6438
	255.652	501.215		23.4853	152.853		261.409	208.64				255.652	150.993	501.215	296.028				23.4853	29.9725	152.853	195.074				261.409	156.821	208.64	125.164
	122.397	142.581		83.4264	43.3137		483.404	81.2548				122.397	72.2902	142.581	84.2111				83.4264	106.471	43.3137	55.2779				483.404	289.998	81.2548	48.7454
	46.6274	95.4264		52.3848	59.2843		81.8701	56.4558				46.6274	27.5391	95.4264	56.3608				52.3848	66.8547	59.2843	75.66				81.8701	49.1145	56.4558	33.8683
	199.539	189.853		100.87	95.669		89.8406	101.61				199.539	117.852	189.853	112.131				100.87	128.733	95.669	122.095				89.8406	53.896	101.61	60.9567
	430.085	62.5269		77.7696	54.4558		119.64	163.066				430.085	254.017	62.5269	36.9297				77.7696	99.2513	54.4558	69.4977				119.64	71.7727	163.066	97.8245
	61.0122	93.8406		50.3848	257.693		157.669	163.983				61.0122	36.0351	93.8406	55.4242				50.3848	64.3022	257.693	328.874				157.669	94.5868	163.983	98.3745
	96.0122	192.652		52.4558	22.1421		71.3553	699.683				96.0122	56.7068	192.652	113.784				52.4558	66.9453	22.1421	28.2583				71.3553	42.8066	699.683	419.745
	156.882	309.635		51.799	67.3553		410.534	483.007				156.882	92.6579	309.635	182.877				51.799	66.1071	67.3553	85.9604				410.534	246.282	483.007	289.76
	492.387	93.1127		31.2132	57.4558		243.25	71.7401				492.387	290.814	93.1127	54.9943				31.2132	39.835	57.4558	73.3264				243.25	145.927	71.7401	43.0374
	281.877	130.841		39.0416	141.368		183.368	71.0122				281.877	166.482	130.841	77.2771				39.0416	49.8258	141.368	180.416				183.368	110.004	71.0122	42.6007
	171.238	97.4264		153.882	173.51		500.86	227.681				171.238	101.136	97.4264	57.542				153.882	196.388	173.51	221.437				500.86	300.47	227.681	136.588
	163.267	201.965		33.3848	12.6569		222.551	36.3137				163.267	96.4288	201.965	119.285				33.3848	42.6064	12.6569	16.153				222.551	133.51	36.3137	21.7849
	205.066	44.9706		84.7696	168.539		81.0122	343.191				205.066	121.116	44.9706	26.5606				84.7696	108.185	168.539	215.093				81.0122	48.5998	343.191	205.883
	123.983	143.498		31.4853	62.4264		314.007	380.681				123.983	73.2268	143.498	84.7526				31.4853	40.1823	62.4264	79.67				314.007	188.375	380.681	228.373
	417.132	37.799		51.0416	116.225		70.2843	72.5563				417.132	246.367	37.799	22.3249				51.0416	65.1405	116.225	148.33				70.2843	42.1641	72.5563	43.5271
	224.238	257.865		47.1421	200.167		407.291	320.25				224.238	132.439	257.865	152.3				47.1421	60.1638	200.167	255.457				407.291	244.337	320.25	192.12
	78.6985	108.983		38.4558	29.3848		75.1127	508.889				78.6985	46.4809	108.983	64.3675				38.4558	49.0782	29.3848	37.5016				75.1127	45.0607	508.889	305.287
	248.363	97.669		45.4558	178.51		373.433	43.1127				248.363	146.688	97.669	57.6853				45.4558	58.0117	178.51	227.818				373.433	224.026	43.1127	25.8636
	54.2843	132.397		16.3137	57.1127		106.426	178.297				54.2843	32.0614	132.397	78.1964				16.3137	20.8199	57.1127	72.8885				106.426	63.846	178.297	106.961
	223.238	212.853		85.669	61.3848		134.811	157.38				223.238	131.849	212.853	125.715				85.669	109.333	61.3848	78.3407				134.811	80.8742	157.38	94.4133
	79.7696	177.397		109.811	197.024		52.5563	132.569				79.7696	47.1136	177.397	104.774				109.811	140.144	197.024	251.447				52.5563	31.5289	132.569	79.5288
	162.752	375.233		31.5563	63.8701		906.666	227.439				162.752	96.1248	375.233	221.62				31.5563	40.2729	63.8701	81.5125				906.666	543.916	227.439	136.442
	103.77	182.823		17.8995	84.0416		265.363	176.468				103.77	61.2885	182.823	107.979				17.8995	22.8438	84.0416	107.256				265.363	159.193	176.468	105.864
	254.664	42.2843		57.6985	77.0833		333.019	187.723				254.664	150.41	42.2843	24.974				57.6985	73.6361	77.0833	98.3755				333.019	199.781	187.723	112.616
	164.468	159.238		50.5563	215.924		198.539	176.309				164.468	97.1382	159.238	94.049				50.5563	64.5211	215.924	275.567				198.539	119.105	176.309	105.769
	247.238	402.404		49.2132	52.9706		87.7401	540.428				247.238	146.024	402.404	237.668				49.2132	62.807	52.9706	67.6023				87.7401	52.6359	540.428	324.207
	79.4264	238.865		67.1127	318.877		89.2965	76.8701				79.4264	46.9109	238.865	141.079				67.1127	85.6508	318.877	406.958				89.2965	53.5696	76.8701	46.1149
	53.0416	103.456		61.9706	63.6274		230.652	88.4264				53.0416	31.3275	103.456	61.1031				61.9706	79.0883	63.6274	81.2027				230.652	138.37	88.4264	53.0477
	88.2843	253.309		145.054	48.4558		142.297	172.167				88.2843	52.1425	253.309	149.609				145.054	185.121	48.4558	61.8404				142.297	85.3647	172.167	103.284
	306.764	94.7107		37.1421	196.581		487.617	225.492				306.764	181.181	94.7107	55.9381				37.1421	47.4016	196.581	250.881				487.617	292.525	225.492	135.275
	108.912	199.652		89.7401	288.777		572.328	143.581				108.912	64.3255	199.652	117.918				89.7401	114.528	288.777	368.543				572.328	343.344	143.581	86.1351
	75.7696	234.622		309.635	60.1127		91.2548	129.983				75.7696	44.7511	234.622	138.573				309.635	395.163	60.1127	76.7172				91.2548	54.7444	129.983	77.9777
	299.818	43.799		38.0416	232.267		40.8701	95.0416				299.818	177.079	43.799	25.8686				38.0416	48.5496	232.267	296.424				40.8701	24.5183	95.0416	57.0162
	516.902	676.625		66.0122	117.326		111.841	97.7696				516.902	305.293	676.625	399.628				66.0122	84.2463	117.326	149.734				111.841	67.094	97.7696	58.6527
	301.877	340.936		34.1421	90.8701		484.889	197.681				301.877	178.295	340.936	201.364				34.1421	43.5729	90.8701	115.971				484.889	290.889	197.681	118.59
	110.054	78.9117		33.0711	128.225		82.0122	64.8701				110.054	65	78.9117	46.6069				33.0711	42.2061	128.225	163.644				82.0122	49.1997	64.8701	38.9161
	109.012	64.669		155.368	221.338		95.9828	212.894				109.012	64.3848	64.669	38.1948				155.368	198.284	221.338	282.477				95.9828	57.5808	212.894	127.717
	52.4853	455.576		40.2843	198.024		70.3848	47.2132				52.4853	30.9989	455.576	269.072				40.2843	51.4117	198.024	252.723				70.3848	42.2244	47.2132	28.3236
	77.2548	134.397		38.9706	350.747		110.64	69.0122				77.2548	45.6283	134.397	79.3776				38.9706	49.7352	350.747	447.632				110.64	66.3735	69.0122	41.4009
	47.0122	36.799		64.4558	85.0122		188.794	64.4558				47.0122	27.7664	36.799	21.7342				64.4558	82.26	85.0122	108.495				188.794	113.259	64.4558	38.6675
	169.397	131.095		19.8284	29.3848		239.368	281.463				169.397	100.049	131.095	77.4277				19.8284	25.3055	29.3848	37.5016				239.368	143.598	281.463	168.852
	200.083	284.966		29.6569	28.1421		275.735	276.723				200.083	118.173	284.966	168.306				29.6569	37.8488	28.1421	35.9156				275.735	165.416	276.723	166.008
	26.7279	212.297		40.7279	63.6274		116.74	216.894				26.7279	15.786	212.297	125.387				40.7279	51.9779	63.6274	81.2027				116.74	70.0333	216.894	130.117
	161.894	399.505		75.7696	283.735		278.865	319.711				161.894	95.6182	399.505	235.956				75.7696	96.6989	283.735	362.109				278.865	167.293	319.711	191.797
	319.806	126.953		37.8995	100.255		97.9828	74.0122				319.806	188.884	126.953	74.9812				37.8995	48.3682	100.255	127.947				97.9828	58.7806	74.0122	44.4005
	146.297	142.439		72.2843	63.9706		192.309	21.0711				146.297	86.4057	142.439	84.1272				72.2843	92.2509	63.9706	81.6407				192.309	115.367	21.0711	12.6407
	395.316	41.799		97.7696	143.782		97.1127	211.054				395.316	233.482	41.799	24.6873				97.7696	124.776	143.782	183.497				97.1127	58.2586	211.054	126.613
	200.865	133.527		39.5269	38.7279		279.108	142.225				200.865	118.635	133.527	78.8637				39.5269	50.4451	38.7279	49.4254				279.108	167.439	142.225	85.3221
	203.179	120.882		36.799	84.0833		218.539	258.38				203.179	120.002	120.882	71.3956				36.799	46.9637	84.0833	107.309				218.539	131.103	258.38	155.004
	50.9411	116.083		49.9706	63.1838		59.4264	67.2548				50.9411	30.0869	116.083	68.5612				49.9706	63.7736	63.1838	80.6366				59.4264	35.6503	67.2548	40.3467
	117.983	198.137		47.4558	193.752		113.811	131.953				117.983	69.6831	198.137	117.024				47.4558	60.5642	193.752	247.271				113.811	68.2762	131.953	79.1598
	182.652	141.811		21.4853	212.752		170.995	98.0833				182.652	107.878	141.811	83.7566				21.4853	27.42	212.752	271.519				170.995	102.581	98.0833	58.8409
	537.558	150.225		51.3553	245.338		307.446	228.421				537.558	317.493	150.225	88.7262				51.3553	65.5408	245.338	313.106				307.446	184.439	228.421	137.032
	86.1838	225.681		64.4558	64.9706		97.9411	140.983				86.1838	50.9019	225.681	133.292				64.4558	82.26	64.9706	82.917				97.9411	58.7556	140.983	84.5766
	199.338	274.693		51.6274	131.811		55.3848	192.154				199.338	117.733	274.693	162.24				51.6274	65.8881	131.811	168.22				55.3848	33.2258	192.154	115.275
	245.066	103.225		27.0711	58.1127		305.936	95.468				245.066	144.741	103.225	60.967				27.0711	34.5488	58.1127	74.1648				305.936	183.533	95.468	57.272
	131.255	83.0416		218.167	53.3848		155.912	91.0538				131.255	77.5218	83.0416	49.0461				218.167	278.429	53.3848	68.1309				155.912	93.5326	91.0538	54.6239
	145.61	42.0416		89.7696	92.8406		75.0416	27.799				145.61	86.0004	42.0416	24.8306				89.7696	114.566	92.8406	118.485				75.0416	45.018	27.799	16.6768
	70.0122	142.983		49.3848	52.6985		33.6274	37.1421				70.0122	41.3506	142.983	84.4486				49.3848	63.026	52.6985	67.255				33.6274	20.1733	37.1421	22.2818
	63.9706	275.652		25.5563	37.0711		118.569	79.669				63.9706	37.7823	275.652	162.806				25.5563	32.6155	37.0711	47.311				118.569	71.1301	79.669	47.794
	156.882	145.297		98.4975	49.8995		148.426	79.4975				156.882	92.6579	145.297	85.8151				98.4975	125.705	49.8995	63.6829				148.426	89.0421	79.4975	47.6911
	412.877	50.4558		79.7696	162.095		68.669	110.598				412.877	243.854	50.4558	29.8002				79.7696	101.804	162.095	206.87				68.669	41.195	110.598	66.3486
	241.25	71.4558		22.4853	364.049		254.078	91.397				241.25	142.487	71.4558	42.2033				22.4853	28.6963	364.049	464.607				254.078	152.423	91.397	54.8297
	686.749	868.886		89.1838	49.2132		319.078	158.882				686.749	405.608	868.886	513.182				89.1838	113.818	49.2132	62.807				319.078	191.417	158.882	95.3147
	327.919	649.328		44.8701	168.995		300.137	83.0122				327.919	193.676	649.328	383.506				44.8701	57.2642	168.995	215.675				300.137	180.054	83.0122	49.7996
	105.255	158.368		63.5563	157.125		206.38	95.7696				105.255	62.1656	158.368	93.5351				63.5563	81.112	157.125	200.526				206.38	123.809	95.7696	57.4529
	342.948	246.652		38.1421	52.6274		146.297	349.049				342.948	202.552	246.652	145.678				38.1421	48.6778	52.6274	67.1643				146.297	87.7644	349.049	209.397
	137.054	202.51		48.2132	66.2843		144.338	118.267				137.054	80.9468	202.51	119.606				48.2132	61.5308	66.2843	84.5935				144.338	86.5895	118.267	70.9493
	119.426	73.9706		29.7279	190.652		402.019	138.882				119.426	70.5357	73.9706	43.6886				29.7279	37.9394	190.652	243.314				402.019	241.174	138.882	83.3165
	258.563	175.953		40.3137	79.9411		341.693	135.882				258.563	152.713	175.953	103.922				40.3137	51.4493	79.9411	102.023				341.693	204.984	135.882	81.5168
	198.581	214.581		38.7279	44.7696		98.7401	448.363				198.581	117.286	214.581	126.736				38.7279	49.4254	44.7696	57.136				98.7401	59.2349	448.363	268.976
	101.113	202.108		87.9411	134.681		249.877	261.836				101.113	59.7192	202.108	119.369				87.9411	112.232	134.681	171.883				249.877	149.903	261.836	157.077
	61.0122	90.5685		66.598	106.296		68.4264	101.61				61.0122	36.0351	90.5685	53.4916				66.598	84.9939	106.296	135.658				68.4264	41.0495	101.61	60.9567
	77.3259	173.208		22.2426	40.799		130.024	425.35				77.3259	45.6703	173.208	102.3				22.2426	28.3865	40.799	52.0686				130.024	78.0026	425.35	255.171
	137.267	175.823		35.3137	80.6985		16.4853	271.505				137.267	81.0727	175.823	103.845				35.3137	45.0682	80.6985	102.989				16.4853	9.88965	271.505	162.878
	140.711	108.054		39.8995	73.9411		196.711	62.8995				140.711	83.1066	108.054	63.8188				39.8995	50.9207	73.9411	94.3653				196.711	118.008	62.8995	37.7339
	280.664	120.426		31.7279	502.529		203.61	81.2965				280.664	165.766	120.426	71.1263				31.7279	40.4919	502.529	641.339				203.61	122.147	81.2965	48.7704
	245.865	335.078		108.841	177.581		140.811	162.598				245.865	145.213	335.078	197.904				108.841	138.905	177.581	226.633				140.811	84.4737	162.598	97.5438
	339.463	99.3259		56.6274	170.439		40.2132	74.9706				339.463	200.494	99.3259	58.6639				56.6274	72.2692	170.439	217.518				40.2132	24.1242	74.9706	44.9754
	52.3848	236.995		43.1421	139.154		281.007	110.87				52.3848	30.9395	236.995	139.974				43.1421	55.0589	139.154	177.592				281.007	168.578	110.87	66.5118
	170.368	109.77		83.8701	86.5269		129.083	508.961				170.368	100.623	109.77	64.8322				83.8701	107.037	86.5269	110.428				129.083	77.438	508.961	305.329
	184.953	131.711		64.2548	23.0711		608.583	322.948				184.953	109.237	131.711	77.791				64.2548	82.0034	23.0711	29.4439				608.583	365.093	322.948	193.739
	255.593	439.316		47.1127	367.191		207.279	156.764				255.593	150.958	439.316	259.469				47.1127	60.1263	367.191	468.617				207.279	124.348	156.764	94.0442
	127.368	82.3553		39.9706	106.125		227.551	158.681				127.368	75.2259	82.3553	48.6407				39.9706	51.0114	106.125	135.439				227.551	136.51	158.681	95.194
	111.054	346.191		140.669	153.882		139.439	110.61				111.054	65.5907	346.191	204.467				140.669	179.525	153.882	196.388				139.439	83.6503	110.61	66.3559
	77.6985	104.598		50.6985	92.4558		108.368	231.12				77.6985	45.8903	104.598	61.7777				50.6985	64.7026	92.4558	117.994				108.368	65.0105	231.12	138.65
	65.9411	142.125		56.9706	36.7279		101.698	29.3137				65.9411	38.9462	142.125	83.9419				56.9706	72.7072	36.7279	46.873				101.698	61.0097	29.3137	17.5855
	65.0416	99.1543		177.154	117.841		230.652	116.054				65.0416	38.4149	99.1543	58.5626				177.154	226.088	117.841	150.391				230.652	138.37	116.054	69.6215
	293.777	178.912		33.1421	52.4558		58.4558	61.6985				293.777	173.511	178.912	105.669				33.1421	42.2967	52.4558	66.9453				58.4558	35.0681	61.6985	37.0134
	138.355	374.99		65.3848	74.2843		293.363	269.066				138.355	81.7155	374.99	221.477				65.3848	83.4456	74.2843	94.8033				293.363	175.99	269.066	161.415
	176.368	780.678		168.439	97.3259		287.439	65.9706				176.368	104.166	780.678	461.085				168.439	214.965	97.3259	124.21				287.439	172.437	65.9706	39.5763
	49.4558	139.51		57.1421	149.853		153.267	342.363				49.4558	29.2096	139.51	82.3973				57.1421	72.9261	149.853	191.246				153.267	91.946	342.363	205.386
	116.355	164.167		43.2843	65.8701		53.8701	419.647				116.355	68.7218	164.167	96.9601				43.2843	55.2404	65.8701	84.0649				53.8701	32.3171	419.647	251.749
	88.7696	177.995		51.799	77.598		277.262	246.51				88.7696	52.4291	177.995	105.127				51.799	66.1071	77.598	99.0323				277.262	166.332	246.51	147.883
	167.225	251.38		192.309	83.8701		219.794	240.167				167.225	98.7668	251.38	148.47				192.309	245.429	83.8701	107.037				219.794	131.856	240.167	144.078
	109.284	93.4264		78.7696	196.622		99.3259	112.698				109.284	64.5456	93.4264	55.1795				78.7696	100.528	196.622	250.934				99.3259	59.5863	112.698	67.6087
	167.439	340.848		55.7696	79.9411		69.1127	77.1127				167.439	98.8927	340.848	201.312				55.7696	71.1744	79.9411	102.023				69.1127	41.4612	77.1127	46.2605
	76.2548	277.149		49.799	102.397		174.368	199.912				76.2548	45.0376	277.149	163.69				49.799	63.5546	102.397	130.681				174.368	104.604	199.912	119.929
	407.031	365.22		49.2132	174.267		189.539	95.1127				407.031	240.401	365.22	215.707				49.2132	62.807	174.267	222.404				189.539	113.706	95.1127	57.0588
	81.4975	202.095		32.3848	206.51		62.1838	86.7696				81.4975	48.1341	202.095	119.362				32.3848	41.3302	206.51	263.552				62.1838	37.3045	86.7696	52.0537
	80.9828	211.652		41.6985	49.2843		223.551	122.74				80.9828	47.8301	211.652	125.006				41.6985	53.2166	49.2843	62.8978				223.551	134.11	122.74	73.6327
	31.5563	352.044		48.1127	22.4853		367.777	198.61				31.5563	18.6378	352.044	207.924				48.1127	61.4025	22.4853	28.6963				367.777	220.632	198.61	119.148
	221.439	288.936		72.7696	309.593		402.274	199.149				221.439	130.786	288.936	170.652				72.7696	92.8702	309.593	395.11				402.274	241.327	199.149	119.471
	81.1127	42.5563		36.4558	103.669		87.4558	117.912				81.1127	47.9068	42.5563	25.1346				36.4558	46.5257	103.669	132.305				87.4558	52.4654	117.912	70.7361
	93.1543	107.811		17.6569	255.593		152.012	143.74				93.1543	55.0188	107.811	63.6755				17.6569	22.5341	255.593	326.194				152.012	91.1933	143.74	86.2308
	108.225	176.38		38.0416	52.5563		209.125	168.669				108.225	63.9201	176.38	104.173				38.0416	48.5496	52.5563	67.0736				209.125	125.456	168.669	101.186
	289.363	209.279		77.1838	40.9706		83.1838	233.894				289.363	170.903	209.279	123.605				77.1838	98.5037	40.9706	52.2876				83.1838	49.9026	233.894	140.315
	153.167	260.836		44.799	34.2132		60.8701	139.953				153.167	90.4633	260.836	154.055				44.799	57.1735	34.2132	43.6637				60.8701	36.5164	139.953	83.959
	155.853	220.338		39.5563	110.498		162.125	45.8995				155.853	92.0499	220.338	130.136				39.5563	50.4827	110.498	141.019				162.125	97.2599	45.8995	27.5355
	73.4853	94.7696		90.598	66.7696		91.9828	336.836				73.4853	43.4019	94.7696	55.9729				90.598	115.623	66.7696	85.2129				91.9828	55.1812	336.836	202.07
	101.74	101.941		60.6985	166.125		401.475	127.397				101.74	60.0898	101.941	60.2085				60.6985	77.4648	166.125	212.012				401.475	240.848	127.397	76.4264
	265.037	47.1127		29.9706	245.22		398.76	105.355				265.037	156.536	47.1127	27.8257				29.9706	38.2492	245.22	312.956				398.76	239.219	105.355	63.2034
	164.61	550.345		43.6274	94.8406		147.083	89.6985				164.61	97.2222	550.345	325.045				43.6274	55.6783	94.8406	121.038				147.083	88.2364	89.6985	53.8108
	148.953	84.3553		57.1421	63.8406		100.113	252.397				148.953	87.9749	84.3553	49.822				57.1421	72.9261	63.8406	81.4748				100.113	60.0584	252.397	151.415
	384.174	96.6396		156.196	76.669		295.735	163.782				384.174	226.901	96.6396	57.0773				156.196	199.341	76.669	97.8467				295.735	177.414	163.782	98.2539
	183.137	286.421		55.598	36.2132		17.8995	451.458				183.137	108.165	286.421	169.166				55.598	70.9554	36.2132	46.2161				17.8995	10.738	451.458	270.833
	386.363	249.007		94.9117	155.752		264.066	93.1838				386.363	228.194	249.007	147.069				94.9117	121.128	155.752	198.775				264.066	158.415	93.1838	55.9017
	120.711	759.826		28.8995	234.451		96.397	325.279				120.711	71.2942	759.826	448.769				28.8995	36.8822	234.451	299.211				96.397	57.8293	325.279	195.137
	249.095	250.22		26.8995	43.5563		73.5269	520.132				249.095	147.121	250.22	147.785				26.8995	34.3298	43.5563	55.5875				73.5269	44.1093	520.132	312.031
	87.4264	33.6274		63.6274	201.652		51.2132	338.137				87.4264	51.6358	33.6274	19.861				63.6274	81.2027	201.652	257.353				51.2132	30.7232	338.137	202.851
	201.551	170.054		72.7696	152.196		47.1421	66.0122				201.551	119.04	170.054	100.437				72.7696	92.8702	152.196	194.236				47.1421	28.2809	66.0122	39.6012
	309.681	98.7817		78.1838	61.2843		1257.48	94.6274				309.681	182.904	98.7817	58.3425				78.1838	99.78	61.2843	78.2124				1257.48	754.374	94.6274	56.7677
	122.782	49.6985		141.225	261.823		62.9706	151.238				122.782	72.5174	49.6985	29.353				141.225	180.235	261.823	334.145				62.9706	37.7765	151.238	90.7286
	59.2132	260.48		63.2843	49.6985		90.5685	324.132				59.2132	34.9725	260.48	153.845				63.2843	80.7649	49.6985	63.4264				90.5685	54.3327	324.132	194.449
	67.4558	132.095		45.7279	184.238		65.1543	484.605				67.4558	39.8408	132.095	78.0183				45.7279	58.359	184.238	235.128				65.1543	39.0866	484.605	290.718
	89.5269	90.7401		23.7279	44.3848		191.811	94.9828				89.5269	52.8764	90.7401	53.593				23.7279	30.2821	44.3848	56.6449				191.811	115.069	94.9828	56.9809
	483.86	201.723		90.1127	254.409		71.799	244.338				483.86	285.778	201.723	119.142				90.1127	115.004	254.409	324.683				71.799	43.0728	244.338	146.58
	200.297	919.519		71.4558	116.154		54.4558	65.3137				200.297	118.299	919.519	543.087				71.4558	91.1935	116.154	148.239				54.4558	32.6684	65.3137	39.1822
	96.4264	142.326		134.711	232.024		112.154	228.61				96.4264	56.9514	142.326	84.0606				134.711	171.921	232.024	296.115				112.154	67.2822	228.61	137.145
	129.196	120.054		29.799	253.108		378.77	350.037				129.196	76.3058	120.054	70.9062				29.799	38.0302	253.108	323.022				378.77	227.227	350.037	209.99
	96.7107	356.492		32.3137	38.2843		30.4853	166.752				96.7107	57.1193	356.492	210.552				32.3137	41.2395	38.2843	48.8593				30.4853	18.2884	166.752	100.036
	48.0416	109.498		28.2426	44.8995		82.3137	147.255				48.0416	28.3744	109.498	64.6715				28.2426	36.0439	44.8995	57.3018				82.3137	49.3806	147.255	88.3393
	215.823	364.149		94.7401	44.1421		63.598	70.4264				215.823	127.47	364.149	215.074				94.7401	120.909	44.1421	56.3352				63.598	38.1529	70.4264	42.2493
	96.1838	173.527		150.569	256.037		62.8701	70.0122				96.1838	56.8081	173.527	102.489				150.569	192.159	256.037	326.76				62.8701	37.7162	70.0122	42.0008
	183.279	123.054		23.5563	280.451		149.782	50.9706				183.279	108.248	123.054	72.6781				23.5563	30.0631	280.451	357.918				149.782	89.8552	50.9706	30.5776
	458.132	173.037		31.4853	196.48		91.4264	86.2843				458.132	270.582	173.037	102.199				31.4853	40.1823	196.48	250.753				91.4264	54.8474	86.2843	51.7626
	178.409	81.3553		31.9706	90.9117		96.3675	441.931				178.409	105.372	81.3553	48.0501				31.9706	40.8016	90.9117	116.024				96.3675	57.8116	441.931	265.118
	289.995	212.711		26.799	186.652		86.1543	70.0122				289.995	171.277	212.711	125.631				26.799	34.2015	186.652	238.209				86.1543	51.6846	70.0122	42.0008
	144.87	97.3259		95.8406	130.912		209.409	420.853				144.87	85.5633	97.3259	57.4827				95.8406	122.314	130.912	167.073				209.409	125.626	420.853	252.473
										mean			100		105.648		mean			100		129.452			mean		100		108.194
