# Supplementary material for: CRMP4-mediated fornix development involves Semaphorin-3E signaling pathway
Source: eLife. 2021 Dec 3;10:e70361. doi: 10.7554/eLife.70361 (PMC8683083; doi:10.7554/eLife.70361)
Supplement: Figure 4—source data 1. [file elife-70361-fig4-data1.xlsx]

## Sheet: Figure 4A
		FORNIX (pf)
		WT						CRMP4 KO
	Mouse tag	96	192	157	145	108	111	91	97	92	151	155
	Right fornix diameter (pxl)	300	325	259	265	372	254	90	122	94	213	121
	Left fornix diameter (pxl)	274	329	318	282	369	305	121	128	217	226	112
	Mean fornix diameter (pxl)	287	327	288.5	273.5	370.5	279.5	105.5	125	155.5	219.5	116.5
	Mean fornix diameter (µm)	180.81	206.01	181.755	172.305	233.415	176.085	66.465	78.75	97.965	138.285	73.395
		WT	KO CRMP4
	Mean fornix diameter (µm)	191.73	90.972
	% decrease	-52.552
		mammillary tract (mt)
		WT						CRMP4 KO
	Mouse tag	145	157	192	96	108	111	92	151	155	91	97
	Right MTT diameter (pixels)	280	307	211	244	301	202	253	287	254	278	175
	Left MTT diameter (pixels)	225	285	229	216	268	200	254	285	265	254	216
	Mean (pixels)	252.5	296	220	230	284.5	201	253.5	286	259.5	266	195.5
	Mean (µm)	159.075	186.48	138.6	144.9	179.235	126.63	159.705	180.18	163.485	167.58	123.165
		WT	KO CRMP4
	Mean MTT diameter (µm)	155.82	158.823

## Sheet: Figure 4B
						Fornix (pf) length
						pixels	µm
					WT 28	1530.21	1918.75
					Wt 30,2	1548.32	1941.45
					Wt 80,3	1482.47	1858.89
					Wt 99,2	1491.91	1870.72
					Wt 101,3	1165.52	1461.46
					Mean WT	1443.69	1810.26
					KO 22,1	960.485	1204.36
					KO 24,2	1196.64	1500.48
					KO 26,1	954.852	1197.3
					KO 29,1	1287.93	1614.95
					KO 90,3	1106.26	1387.15
					KO 104,1	893.056	1119.81
					Mean KO (pixels)	1066.54	1337.34
					calibration factor (um/pixel)	1.25391
					% decrease	26.124

## Sheet: Figure 4C
		E18.5			P0			P2							E18.5
		WT	KO		WT	KO		WT	KO						Wt 251	WT 422	WT 423	KO 245	KO 426
		0.00381062	0.00162208		0.0101544	0.00575444		0.0139896	0.00822819					Fornix volume (voxels)	135773	166980	108573	57795	91603
		0.00468648	0.00257094		0.00782835	0.00347565		0.0151087	0.0119775					Fornix volume (mm3)	0.00381062	0.00468648	0.00304723	0.00162208	0.00257094
		0.00304723			0.00973606	0.00442086		0.0112374
					0.00875204	0.00411691									P0
						0.00458639									WT 120	WT 118	WT 175	WT 521	KO 116	KO 119	KO 124	KO 519	KO 526
														Fornix volume (voxels)	358334	276250	343570	227137	203065	122650	156005	112072	124852
	mean fornix volume	0.00384811	0.00209651		0.00911772	0.00447085		0.0134452	0.0101029		global reduction			Fornix volume (mm3)	0.0101544	0.00782835	0.00973606	0.00875204	0.00575444	0.00347565	0.00442086	0.00411691	0.00458639
	% decrease		45.5185			50.9653			24.8593		40.4477
															P2
															Wt 226	WT 227	WT 270	KO 225	KO 268
														Volume (voxels)	498452	538327	400390	293172	426761
														Volume (mm3)	0.0139896	0.0151087	0.0112374	0.00822819	0.0119775
