# Supplementary material for: CRMP4-mediated fornix development involves Semaphorin-3E signaling pathway
Source: eLife. 2021 Dec 3;10:e70361. doi: 10.7554/eLife.70361 (PMC8683083; doi:10.7554/eLife.70361)
Supplement: Figure 5—source data 1. [file elife-70361-fig5-data1.xlsx]

## Sheet: Figure 5S1
Fichier	Genotype	µm2	mm2	NbreNuclei Rouge	NbreNuclei Vert	YFP nuclei/mm2		mean
386_001.tif	KO	185898	0.185898	32	24	129.103		117.118
386_002.tif	KO	209259	0.209259	32	22	105.133
405_001.tif	KO	226615	0.226615	53	25	110.319		137.862
405_002.tif	KO	284152	0.284152	27	47	165.404
441_001.tif	KO	214251	0.214251	65	25	116.685		124.03
441_002.tif	KO	114178	0.114178	25	15	131.374
521_001.tif	KO	245796	0.245796	75	28	113.916		121.171
521_002.tif	KO	303678	0.303678	76	39	128.426
468_001.tif	KO	189548	0.189548	4	38	200.477		199.728
468_002.tif	KO	216103	0.216103	1	43	198.979
469_001.tif	WT	169666	0.169666	47	21	123.773		112.729
469_002.tif	WT	147513	0.147513	50	15	101.686
524_001.tif	WT	358293	0.358293	113	40	111.64		127.005
524_002.tif	WT	287982	0.287982	100	41	142.37
406_001.tif	WT	294952	0.294952	71	46	155.958		153.227
406_002.tif	WT	172762	0.172762	42	26	150.496
511_001.tif	WT	118306	0.118306	18	23	194.411		187.956
511_002.tif	WT	115702	0.115702	29	21	181.501
512_001.tif	WT	154449	0.154449	20	34	220.138		196.169
512_002.tif	WT	174216	0.174216	28	30	172.2
