# Supplementary material for: CRMP4-mediated fornix development involves Semaphorin-3E signaling pathway
Source: eLife. 2021 Dec 3;10:e70361. doi: 10.7554/eLife.70361 (PMC8683083; doi:10.7554/eLife.70361)
Supplement: Figure 6—source data 1. [file elife-70361-fig6-data1.xlsx]

## Sheet: Fig 6B and 6C
	Mammillary tract measurement										Post-commissural fornix measurement
	mice number	genotype		acquisition#	volume mt						mice number	genotype		acquisition#	volume fornix	mean	% of reduction compared to WT
		CRMP4	SEMA									CRMP4	SEMA
	635	+/+	+/+	12-05-31_100	0.0227143	0.0219185					635	+/+	+/+	12-05-31_100	0.0322919	0.0268426
	640	+/+	+/+	10-54-35_100	0.0212272						640	+/+	+/+	10-54-35_100	0.02772
	647.2	+/+	+/+	11-40-00_100	0.019833						647.2	+/+	+/+	11-40-00_100	0.0303928
	658	+/+	+/+	08-01-46_100	0.0196382						658	+/+	+/+	08-01-46_100	0.0221128
	662	+/+	+/+	13-38-15_100	0.0230018						662	+/+	+/+	13-38-15_100	0.0319066
	664	+/+	+/+	14-20-49_100	0.0335333						664	+/+	+/+	14-20-49_100	0.0286401
	666	+/+	+/+	09-04-31_100	0.0254367						666	+/+	+/+	09-04-31_100	0.028701
	688	+/+	+/+	10-22-18_100	0.0239075						688	+/+	+/+	10-22-18_100	0.0325041
	691	+/+	+/+	13-17-31_100	0.0175677						691	+/+	+/+	13-17-31_100	0.0198339
	695	+/+	+/+	13-54-49_100	0.0168037						695	+/+	+/+	13-54-49_100	0.0266688
	698	+/+	+/+	13-30-00_100	0.0174405						698	+/+	+/+	13-30-00_100	0.014496
	634	+/-	+/-	12-15-06_100	0.0215456	0.0206804					634	+/-	+/-	12-15-06_100_	0.017985	0.0184865	-31.1299
	638	+/-	+/-	10-02-11_100	0.0165434						638	+/-	+/-	10-02-11_100	0.0133314
	648	+/-	+/-	12-02-36_100	0.0180938						648	+/-	+/-	12-02-36_100	0.0159193
	656	+/-	+/-	12-26-34_100	0.0186829						656	+/-	+/-	12-26-34_100	0.0168727
	659	+/-	+/-	10-16-53_100	0.0229038						659	+/-	+/-	10-16-53_100	0.0241943
	660	+/-	+/-	12-36-02_100	0.0215774						660	+/-	+/-	12-36-02_100	0.0221711
	661	+/-	+/-	09-04-40_100	0.0163041						661	+/-	+/-	09-04-40_100_	0.0186039
	642	+/-	+/-	14-31-47_100	0.0297925						642	+/-	+/-	14-31-47_100	0.0188142
	636	+/+	+/-	09-55-43_100	0.0159746	0.0203645					636	+/+	+/-	09-55-43_100	0.0338359	0.0273722	1.97332
	639	+/+	+/-	14-55-27_100	0.0187993						639	+/+	+/-	14-55-27_100	0.0280626
	650	+/+	+/-	09-38-10_100	0.0214334						650	+/+	+/-	09-38-10_100	0.0293667
	657	+/+	+/-	15-28-02_100	0.0267978						657	+/+	+/-	15-28-02_100	0.0181275
	692	+/+	+/-	15-22-13_100	0.0195279						692	+/+	+/-	15-22-13_100	0.0292877
	693	+/+	+/-	08-56-35_100	0.0171911						693	+/+	+/-	08-56-35_100	0.0221176
	644	+/+	+/-	13-38-41_100	0.0228274						644	+/+	+/-	13-38-41_100	0.0308077
	694	+/-	+/+	11-03-23_100	0.0179195	0.0199621					694	+/-	+/+	11-03-23_100	0.0217905	0.0257944	-3.90486
	690	+/-	+/+	10-20-10_100	0.0182753						690	+/-	+/+	10-20-10_100	0.0210828
	689	+/-	+/+	13-21-16_100	0.0198431						689	+/-	+/+	13-21-16_100	0.0288217
	696	+/-	+/+	09-26-04_100	0.0207902						696	+/-	+/+	09-26-04_100	0.0228151
	697	+/-	+/+	11-23-51_100	0.0224673						697	+/-	+/+	11-23-51_100	0.0276537
	653	+/-	+/+	12-15-11_100	0.0193965						653	+/-	+/+	12-15-11_100	0.0301931
	645	+/-	+/+	09-51-22_100	0.0204						645	+/-	+/+	09-51-22_100	0.0295867
	647.1	+/-	+/+	09-45-00_100	0.0228654						647.1	+/-	+/+	09-45-00_100	0.0288805
	643	+/-	+/+	14-49-45_100	0.0177017						643	+/-	+/+	14-49-45_100	0.0213255
