# Supplementary material for: CRMP4-mediated fornix development involves Semaphorin-3E signaling pathway
Source: eLife. 2021 Dec 3;10:e70361. doi: 10.7554/eLife.70361 (PMC8683083; doi:10.7554/eLife.70361)
Supplement: Supplementary file 1. [file elife-70361-supp2.xlsx]

## Sheet: Protein sets
accession	gene_name	samesets_accessions	subsets_accessions	description	protein_set_score	coverage	MW	#observable_peptides	#sequences	#specific_sequences	#peptides	#specific_peptides	spectral_count	specific_spectral_count
MAP6_MOUSE	Map6	MAP6_MOUSE	D3Z6W1_MOUSE	sp|Q7TSJ2|MAP6_MOUSE Microtubule-associated protein 6 OS=Mus musculus OX=10090 GN=Map6 PE=1 SV=2	4913.72	73.62	96450	70	71	15	80	19	1758	329
A0A140LIT9_MOUSE	Map6	A0A140LIT9_MOUSE		tr|A0A140LIT9|A0A140LIT9_MOUSE Microtubule-associated protein 6 OS=Mus musculus OX=10090 GN=Map6 PE=1 SV=1	3672.76	72.12	74541	54	58	2	63	2	1432	3
HSP7C_MOUSE	Hspa8	HSP7C_MOUSE; Q3TEK2_MOUSE; Q3TH56_MOUSE; Q3TQ13_MOUSE; Q3TZJ3_MOUSE; Q3UBA6_MOUSE	A1L347_MOUSE; B2CSK2_MOUSE; D3Z5E2_MOUSE; HS71L_MOUSE; O88687_MOUSE; Q3KQJ4_MOUSE; Q3TB63_MOUSE; Q3TF16_MOUSE; Q3TH04_MOUSE; Q3TRH3_MOUSE; Q3U9L2_MOUSE; Q3UBR0_MOUSE; Q3UDS0_MOUSE; Q3ULM1_MOUSE; Q3UXU1_MOUSE; Q504P4_MOUSE; Q9QWU1_MOUSE; Q9QZ38_MOUSE; Q9R2A1_MOUSE	sp|P63017|HSP7C_MOUSE Heat shock cognate 71 kDa protein OS=Mus musculus OX=10090 GN=Hspa8 PE=1 SV=1	2157.22	49.38	70871	37	28	19	34	25	152	107
NEUL_MOUSE	Nln	NEUL_MOUSE	A0A286YD12_MOUSE; A0A286YD77_MOUSE; Q3TB65_MOUSE; Q3UUI1_MOUSE; Q8C7J2_MOUSE	sp|Q91YP2|NEUL_MOUSE Neurolysin, mitochondrial OS=Mus musculus OX=10090 GN=Nln PE=1 SV=1	2179.27	43.32	80429	38	27	27	43	43	109	109
MAP1B_MOUSE	Map1b	B2RQQ5_MOUSE; MAP1B_MOUSE	A0PJ96_MOUSE; Q3TYV8_MOUSE; Q3TZM8_MOUSE; Q3UF78_MOUSE; Q3UPV4_MOUSE; Q8CAI9_MOUSE; Q8CFR9_MOUSE	sp|P14873|MAP1B_MOUSE Microtubule-associated protein 1B OS=Mus musculus OX=10090 GN=Map1b PE=1 SV=2	1438.07	13.96	270255	119	26	25	27	26	59	56
TBB2A_MOUSE	Tubb2a	TBB2A_MOUSE	#C#ENSEMBL:ENSBTAP00000025008; B2RSN3_MOUSE; G3UZR1_MOUSE; Q62363_MOUSE; Q99J49_MOUSE; TBB1_MOUSE; TBB2B_MOUSE	sp|Q7TMM9|TBB2A_MOUSE Tubulin beta-2A chain OS=Mus musculus OX=10090 GN=Tubb2a PE=1 SV=1	2056.69	53.26	49907	22	24	4	40	6	105	9
USP9X_MOUSE	Usp9x	Q4FE56_MOUSE; USP9X_MOUSE	E9PWA9_MOUSE; G3UY52_MOUSE; G3UZS3_MOUSE; Q8BR77_MOUSE; Q8BS89_MOUSE; Q8C7T5_MOUSE	sp|P70398|USP9X_MOUSE Probable ubiquitin carboxyl-terminal hydrolase FAF-X OS=Mus musculus OX=10090 GN=Usp9x PE=1 SV=2	994.71	11.02	290711	140	24	18	28	22	37	30
TBB5_MOUSE	Tubb5	TBB5_MOUSE	#C#ENSEMBL:ENSBTAP00000025008; G3UZR1_MOUSE; Q80ZV2_MOUSE; TBB1_MOUSE	sp|P99024|TBB5_MOUSE Tubulin beta-5 chain OS=Mus musculus OX=10090 GN=Tubb5 PE=1 SV=1	1743.15	52.25	49671	22	21	3	34	4	101	12
#C#P04264		#C#P04264	#C#H-INV:HIT000016045; A1L0X5_MOUSE; E9Q0F0_MOUSE; Q0VDM9_MOUSE; Q0VDN0_MOUSE; Q6IFT3_MOUSE	SWISS-PROT:P04264 Tax_Id=9606 Gene_Symbol=KRT1 Keratin, type II cytoskeletal 1	1631.17	32.92	66018	35	21	14	26	18	127	78
TBB4B_MOUSE	Tubb4b	TBB4B_MOUSE	#C#ENSEMBL:ENSBTAP00000025008; G3UZR1_MOUSE; Q62363_MOUSE; Q9CVR0_MOUSE; Q9DCR1_MOUSE; TBB1_MOUSE	sp|P68372|TBB4B_MOUSE Tubulin beta-4B chain OS=Mus musculus OX=10090 GN=Tubb4b PE=1 SV=1	1722.95	48.09	49831	22	20	1	33	1	94	2
2AAA_MOUSE	Ppp2r1a	2AAA_MOUSE; Q8C2E1_MOUSE	2AAB_MOUSE; G3UWL2_MOUSE; G3UWS4_MOUSE; G3UXQ1_MOUSE; H3BIV7_MOUSE; H3BJ83_MOUSE; H3BK50_MOUSE; H3BKU1_MOUSE; H3BLE7_MOUSE; H3BLQ0_MOUSE; Q3TTF6_MOUSE; Q7TMX2_MOUSE; Q8BIX1_MOUSE	sp|Q76MZ3|2AAA_MOUSE Serine/threonine-protein phosphatase 2A 65 kDa regulatory subunit A alpha isoform OS=Mus musculus OX=10090 GN=Ppp2r1a PE=1 SV=3	1254.13	48.56	65323	39	20	20	29	29	55	55
#C#P13645		#C#P13645	#C#P02535-1; #C#Q148H6; #C#Q3ZAW8; #C#Q7Z3Y7; #C#Q7Z3Y8; #C#Q7Z3Z0; #C#Q9Z2K1; A2A513_MOUSE; B2RU72_MOUSE; K1C10_MOUSE; K1C16_MOUSE; K1C25_MOUSE; K1C27_MOUSE; Q3SYP5_MOUSE; Q3ZAW8_MOUSE; Q9EQD6_MOUSE; Q9EQD7_MOUSE	SWISS-PROT:P13645 Tax_Id=9606 Gene_Symbol=KRT10 Keratin, type I cytoskeletal 10	1378.62	44.35	59511	28	20	18	21	18	71	61
ACTG_MOUSE	Actg1	ACTG_MOUSE; Q4KL81_MOUSE	A0A0U1RQ96_MOUSE; A0A1D5RM20_MOUSE; A0A494B9T3_MOUSE; A1E281_MOUSE; ACTA_MOUSE; ACTC_MOUSE; ACTH_MOUSE; ACTS_MOUSE; B1ATY1_MOUSE; D3YZY0_MOUSE; D3Z2K3_MOUSE; E9Q606_MOUSE; F6WX90_MOUSE; F8WGM8_MOUSE; G3UYG0_MOUSE; G3UZ07_MOUSE; I6L9D2_MOUSE; O89054_MOUSE; Q3TG92_MOUSE; Q3TSB7_MOUSE; Q3U122_MOUSE; Q3U804_MOUSE; Q3U939_MOUSE; Q3UCF8_MOUSE; Q3UD81_MOUSE; Q3UIJ3_MOUSE; Q3UJ36_MOUSE; Q497E4_MOUSE; Q61…	sp|P63260|ACTG_MOUSE Actin, cytoplasmic 2 OS=Mus musculus OX=10090 GN=Actg1 PE=1 SV=1	1171.84	53.87	41793	23	19	2	23	3	99	8
Q3UBP6_MOUSE	Actb	Q3UBP6_MOUSE	A0A0U1RQ96_MOUSE; A0A1D5RM20_MOUSE; A0A494B9T3_MOUSE; D3YZY0_MOUSE; D3Z2K3_MOUSE; E9Q2D1_MOUSE; F6WX90_MOUSE; I6L9D2_MOUSE; O89054_MOUSE; Q3UBQ4_MOUSE; Q61273_MOUSE; Q61274_MOUSE; Q61852_MOUSE; Q6IWE2_MOUSE; Q7M0E4_MOUSE; Q8CF71_MOUSE; V9GXQ2_MOUSE	tr|Q3UBP6|Q3UBP6_MOUSE Uncharacterized protein OS=Mus musculus OX=10090 GN=Actb PE=2 SV=1	1032.9	50.13	41769	23	18	3	20	4	98	21
#C#P35908		#C#P35908	#C#O95678; #C#P07744; #C#P08729; #C#Q01546; #C#Q14CN4-1; #C#Q3KNV1; #C#Q3SY84; #C#Q6IME9; #C#Q7RTS7; #C#Q7Z794; #C#Q9DCV7; #C#Q9R0H5; #C#REFSEQ:XP_932229; E9Q1Z0_MOUSE; K2C4_MOUSE; K2C71_MOUSE; K2C72_MOUSE; K2C74_MOUSE; K2C7_MOUSE; KRT84_MOUSE; NFH_MOUSE; Q148Q7_MOUSE; Q80TQ3_MOUSE; Q8BIS2_MOUSE	SWISS-PROT:P35908 Tax_Id=9606 Gene_Symbol=KRT2 Keratin, type II cytoskeletal 2 epidermal	1042.08	29.3	65865	42	18	10	18	10	70	31
TBB4A_MOUSE	Tubb4a	TBB4A_MOUSE		sp|Q9D6F9|TBB4A_MOUSE Tubulin beta-4A chain OS=Mus musculus OX=10090 GN=Tubb4a PE=1 SV=3	1296.13	43.02	49586	22	17	4	25	6	71	11
#C#P35527		#C#P35527		SWISS-PROT:P35527 Tax_Id=9606 Gene_Symbol=KRT9 Keratin, type I cytoskeletal 9	1123.91	42.22	62129	30	17	17	20	20	62	62
TBB3_MOUSE	Tubb3	TBB3_MOUSE	A0A1D5RM76_MOUSE; Q9CRT0_MOUSE	sp|Q9ERD7|TBB3_MOUSE Tubulin beta-3 chain OS=Mus musculus OX=10090 GN=Tubb3 PE=1 SV=1	1390.8	36.67	50419	22	16	5	25	8	63	10
DHE3_MOUSE	Glud1	DHE3_MOUSE	F7CFA5_MOUSE; Q3TSQ7_MOUSE	sp|P26443|DHE3_MOUSE Glutamate dehydrogenase 1, mitochondrial OS=Mus musculus OX=10090 GN=Glud1 PE=1 SV=1	832.25	31.54	61337	37	16	16	18	18	24	24
#C#P48668		#C#P48668	#C#H-INV:HIT000016045; #C#O95678; #C#P02538; #C#P04259; #C#P05787; #C#P07744; #C#P08729; #C#Q14CN4-1; #C#Q3KNV1; #C#Q3SY84; #C#Q6IME9; #C#Q7RTS7; #C#Q9DCV7; #C#REFSEQ:XP_932229; D3Z6R0_MOUSE; E9Q1Z0_MOUSE; K2C4_MOUSE; K2C72_MOUSE; K2C7_MOUSE; KRT84_MOUSE; NFH_MOUSE; Q148Q7_MOUSE; Q6IFZ8_MOUSE; Q80TQ3_MOUSE; Q8BIS2_MOUSE; Q9CV13_MOUSE	SWISS-PROT:P48668 Tax_Id=9606 Gene_Symbol=KRT6C Keratin, type II cytoskeletal 6C	771.97	31.74	60025	36	16	8	16	8	34	12
MAP1A_MOUSE	Map1a	A2ARP8_MOUSE; MAP1A_MOUSE		sp|Q9QYR6|MAP1A_MOUSE Microtubule-associated protein 1A OS=Mus musculus OX=10090 GN=Map1a PE=1 SV=2	588.63	7.46	300140	139	16	15	16	15	25	22
DPYL2_MOUSE	Dpysl2	DPYL2_MOUSE		sp|O08553|DPYL2_MOUSE Dihydropyrimidinase-related protein 2 OS=Mus musculus OX=10090 GN=Dpysl2 PE=1 SV=2	984.04	42.13	62278	34	15	13	19	16	42	36
HS74L_MOUSE	Hspa4l	HS74L_MOUSE	A0A0N4SVU2_MOUSE; E0CY23_MOUSE; Q3TTD4_MOUSE	sp|P48722|HS74L_MOUSE Heat shock 70 kDa protein 4L OS=Mus musculus OX=10090 GN=Hspa4l PE=1 SV=2	726.57	25.3	94382	61	15	13	15	13	21	18
#C#P13647		#C#P13647	#C#H-INV:HIT000016045; #C#O95678; #C#P05787; #C#P07744; #C#P08729; #C#Q14CN4-1; #C#Q3KNV1; #C#Q3SY84; #C#Q6IME9; #C#Q7RTS7; #C#Q9DCV7; #C#REFSEQ:XP_932229; E9Q1Z0_MOUSE; K2C4_MOUSE; K2C72_MOUSE; K2C7_MOUSE; KRT84_MOUSE; NFH_MOUSE; Q148Q7_MOUSE; Q80TQ3_MOUSE; Q8BIS2_MOUSE	SWISS-PROT:P13647 Tax_Id=9606 Gene_Symbol=KRT5 Keratin, type II cytoskeletal 5	730.74	25.08	62378	35	14	7	15	8	23	9
MTAP2_MOUSE	Map2	A0A668KLC6_MOUSE; MTAP2_MOUSE	B2KGT5_MOUSE; G3UWW1_MOUSE; G3UZE9_MOUSE; G3UZJ2_MOUSE; G3UZK9_MOUSE; G3UZV6_MOUSE; Q3TLQ0_MOUSE; Q3URJ7_MOUSE; Q80X35_MOUSE; Q80ZL4_MOUSE	sp|P20357|MTAP2_MOUSE Microtubule-associated protein 2 OS=Mus musculus OX=10090 GN=Map2 PE=1 SV=2	450.25	9.63	199132	100	14	14	14	14	15	15
TBA1A_MOUSE	Tuba1a	TBA1A_MOUSE	O89052_MOUSE; Q5FW91_MOUSE; Q9D9Y2_MOUSE; TBA3_MOUSE	sp|P68369|TBA1A_MOUSE Tubulin alpha-1A chain OS=Mus musculus OX=10090 GN=Tuba1a PE=1 SV=1	653.45	38.58	50136	23	12	6	12	6	52	43
HS105_MOUSE	Hsph1	E9Q0U7_MOUSE; HS105_MOUSE	A0A0J9YTZ7_MOUSE; D3Z027_MOUSE; D3Z3I9_MOUSE; Q8C6H1_MOUSE	sp|Q61699|HS105_MOUSE Heat shock protein 105 kDa OS=Mus musculus OX=10090 GN=Hsph1 PE=1 SV=2	648.51	17.13	96407	55	12	10	12	10	19	16
PDIA1_MOUSE	P4hb	PDIA1_MOUSE; Q3TF72_MOUSE; Q3TGS0_MOUSE; Q3THC3_MOUSE; Q3TIM0_MOUSE; Q3TWE3_MOUSE; Q3UA23_MOUSE; Q3UDR2_MOUSE; Q3UJA8_MOUSE; Q3URP6_MOUSE	E9Q8G8_MOUSE; Q3TIQ5_MOUSE; Q3TT76_MOUSE; Q3U738_MOUSE; Q3UBY9_MOUSE	sp|P09103|PDIA1_MOUSE Protein disulfide-isomerase OS=Mus musculus OX=10090 GN=P4hb PE=1 SV=2	573.43	32.61	57058	39	12	12	12	12	15	15
TBA4A_MOUSE	Tuba4a	A0A0A0MQA5_MOUSE; TBA4A_MOUSE	A0A087WQS4_MOUSE; A0A087WRB4_MOUSE; A0A087WS35_MOUSE; A0A087WSB0_MOUSE; A0A087WSL5_MOUSE	sp|P68368|TBA4A_MOUSE Tubulin alpha-4A chain OS=Mus musculus OX=10090 GN=Tuba4a PE=1 SV=1	524.55	35.94	49924	23	11	5	11	5	25	16
TBB6_MOUSE	Tubb6	Q3UMM1_MOUSE; TBB6_MOUSE	#C#ENSEMBL:ENSBTAP00000025008; Q3U9U3_MOUSE; Q9CUN8_MOUSE; TBB1_MOUSE	sp|Q922F4|TBB6_MOUSE Tubulin beta-6 chain OS=Mus musculus OX=10090 GN=Tubb6 PE=1 SV=1	669.57	22.6	50090	23	10	1	13	1	40	1
HSP72_MOUSE	Hspa2	B7U582_MOUSE; HSP72_MOUSE	A1L347_MOUSE; B2CSK2_MOUSE; HS71L_MOUSE; O88687_MOUSE; Q9QWU1_MOUSE; Q9R2A1_MOUSE	sp|P17156|HSP72_MOUSE Heat shock-related 70 kDa protein 2 OS=Mus musculus OX=10090 GN=Hspa2 PE=1 SV=2	593.64	16.43	69642	40	10	2	10	2	45	2
1433E_MOUSE	Ywhae	1433E_MOUSE; Q5SS40_MOUSE; Q8BPH1_MOUSE	D6REF3_MOUSE; F6WA09_MOUSE	sp|P62259|1433E_MOUSE 14-3-3 protein epsilon OS=Mus musculus OX=10090 GN=Ywhae PE=1 SV=1	373.18	44.31	29174	18	10	10	10	10	14	14
Q5SVJ0_MOUSE	Camk2b	Q5SVJ0_MOUSE	A0A286YCB8_MOUSE; A0A286YCH4_MOUSE; A0A286YCW8_MOUSE; A0A286YDK9_MOUSE; A0A286YDL6_MOUSE; KCC2B_MOUSE; Q3TY93_MOUSE; Q5SVI0_MOUSE; Q5SVI1_MOUSE; Q5SVI2_MOUSE; Q5SVI3_MOUSE; Q5SVI9_MOUSE; Q5SVJ1_MOUSE; Q68EG2_MOUSE; Q8BL41_MOUSE; Q8C4I3_MOUSE; Q8K4W4_MOUSE; Q8K4W5_MOUSE; Q9WVJ1_MOUSE	tr|Q5SVJ0|Q5SVJ0_MOUSE Calcium/calmodulin-dependent protein kinase OS=Mus musculus OX=10090 GN=Camk2b PE=1 SV=1	637.97	21.47	72903	34	9	6	12	7	16	8
GLNA_MOUSE	Glul	GLNA_MOUSE	D3YVK1_MOUSE; V9GZG5_MOUSE; V9GZP0_MOUSE	sp|P15105|GLNA_MOUSE Glutamine synthetase OS=Mus musculus OX=10090 GN=Glul PE=1 SV=6	513.06	22.52	42120	21	9	9	9	9	29	29
2ABG_MOUSE	Ppp2r2c	2ABG_MOUSE		sp|Q8BG02|2ABG_MOUSE Serine/threonine-protein phosphatase 2A 55 kDa regulatory subunit B gamma isoform OS=Mus musculus OX=10090 GN=Ppp2r2c PE=1 SV=1	436.22	20.58	51462	28	9	6	9	6	13	8
HS90A_MOUSE	Hsp90aa1	HS90A_MOUSE; Q3UIF3_MOUSE; Q80Y52_MOUSE	A0PJ91_MOUSE; A2A6A2_MOUSE; B7ZC49_MOUSE; B7ZC50_MOUSE; Q3TJU7_MOUSE; Q3TKA2_MOUSE; Q3TKB9_MOUSE; Q3TKG0_MOUSE; Q8C2A9_MOUSE; Q8C5U3_MOUSE	sp|P07901|HS90A_MOUSE Heat shock protein HSP 90-alpha OS=Mus musculus OX=10090 GN=Hsp90aa1 PE=1 SV=4	549.33	12.96	84788	38	8	5	9	6	11	7
#C#P02533		#C#P02533	#C#A2A4G1; #C#P08727; #C#Q04695; #C#Q148H6; #C#Q3ZAW8; #C#Q7Z3Y7; #C#Q7Z3Y8; #C#Q7Z3Z0; #C#Q9QWL7; #C#Q9Z2K1; B1AQ77_MOUSE; B2RU72_MOUSE; K1C14_MOUSE; K1C15_MOUSE; K1C16_MOUSE; K1C17_MOUSE; K1C25_MOUSE; K1C27_MOUSE; Q3SYP5_MOUSE; Q3ZAW8_MOUSE; Q9EQD6_MOUSE; Q9EQD7_MOUSE	SWISS-PROT:P02533 Tax_Id=9606 Gene_Symbol=KRT14 Keratin, type I cytoskeletal 14	526.07	18.64	51622	34	8	3	9	3	21	4
#C#ENSEMBL:ENSBTAP00000038253		#C#ENSEMBL:ENSBTAP00000038253	#C#REFSEQ:XP_932229; A1L0X5_MOUSE; E9Q0F0_MOUSE; Q0VDM9_MOUSE; Q0VDN0_MOUSE; Q6IFT3_MOUSE	(Bos taurus) 63 kDa protein	523.3	13.7	63165	36	8	1	9	1	43	2
#C#P08779		#C#P08779	#C#A2A4G1; #C#P08727; #C#Q148H6; #C#Q3ZAW8; #C#Q7Z3Y7; #C#Q7Z3Y8; #C#Q7Z3Z0; #C#Q9Z2K1; B1AQ77_MOUSE; B2RU72_MOUSE; K1C15_MOUSE; K1C16_MOUSE; K1C25_MOUSE; K1C27_MOUSE; Q3SYP5_MOUSE; Q3ZAW8_MOUSE; Q9EQD6_MOUSE; Q9EQD7_MOUSE	SWISS-PROT:P08779 Tax_Id=9606 Gene_Symbol=KRT16 Keratin, type I cytoskeletal 16	489.75	18.82	51268	33	8	3	9	3	20	3
KCC2A_MOUSE	Camk2a	KCC2A_MOUSE; Q80TN1_MOUSE	D3Z7K9_MOUSE; F6WHR9_MOUSE; F8WHB5_MOUSE; F8WIS9_MOUSE; Q8C4I3_MOUSE	sp|P11798|KCC2A_MOUSE Calcium/calmodulin-dependent protein kinase type II subunit alpha OS=Mus musculus OX=10090 GN=Camk2a PE=1 SV=2	483.39	18.83	54115	27	8	7	9	7	17	13
1433Z_MOUSE	Ywhaz	1433Z_MOUSE; A0A2I3BQ03_MOUSE	D3YW45_MOUSE; D3YXF4_MOUSE; D3YXN6_MOUSE; Q8BWN0_MOUSE	sp|P63101|1433Z_MOUSE 14-3-3 protein zeta/delta OS=Mus musculus OX=10090 GN=Ywhaz PE=1 SV=1	573.66	31.43	27771	19	7	7	14	14	26	26
IMB1_MOUSE	Kpnb1	IMB1_MOUSE; Q3TFE8_MOUSE; Q3UHW8_MOUSE; Q7TSZ6_MOUSE		sp|P70168|IMB1_MOUSE Importin subunit beta-1 OS=Mus musculus OX=10090 GN=Kpnb1 PE=1 SV=2	406	9.02	97184	44	7	7	8	8	8	8
1433G_MOUSE	Ywhag	1433G_MOUSE; A8IP69_MOUSE		sp|P61982|1433G_MOUSE 14-3-3 protein gamma OS=Mus musculus OX=10090 GN=Ywhag PE=1 SV=2	266.26	29.96	28303	18	7	6	8	6	14	12
2ABA_MOUSE	Ppp2r2a	2ABA_MOUSE; Q3TPC5_MOUSE; Q3TT94_MOUSE; Q571J7_MOUSE	Q7TPQ7_MOUSE; Q8BVB4_MOUSE; Q9CWU3_MOUSE	sp|Q6P1F6|2ABA_MOUSE Serine/threonine-protein phosphatase 2A 55 kDa regulatory subunit B alpha isoform OS=Mus musculus OX=10090 GN=Ppp2r2a PE=1 SV=1	385.03	18.12	51692	28	7	4	7	4	12	7
HSP74_MOUSE	Hspa4	HSP74_MOUSE; Q3U2G2_MOUSE; Q571M2_MOUSE; Q99L75_MOUSE	Q8C6R3_MOUSE	sp|Q61316|HSP74_MOUSE Heat shock 70 kDa protein 4 OS=Mus musculus OX=10090 GN=Hspa4 PE=1 SV=1	348.31	10.23	94133	57	7	5	7	5	9	6
ALDOA_MOUSE	Aldoa	A6ZI44_MOUSE; ALDOA_MOUSE; Q5FWB7_MOUSE; Q6NY00_MOUSE	A0A0U1RPN8_MOUSE; A0A0U1RPT5_MOUSE; A6ZI46_MOUSE; A6ZI47_MOUSE; D3YV98_MOUSE; D3YWI1_MOUSE; D3Z510_MOUSE; Q9CPQ9_MOUSE	sp|P05064|ALDOA_MOUSE Fructose-bisphosphate aldolase A OS=Mus musculus OX=10090 GN=Aldoa PE=1 SV=2	347.24	18.13	39356	24	7	7	7	7	16	16
ALBU_MOUSE	Alb	ALBU_MOUSE; Q546G4_MOUSE		sp|P07724|ALBU_MOUSE Albumin OS=Mus musculus OX=10090 GN=Alb PE=1 SV=3	330.58	16.45	68693	43	7	7	7	7	11	11
AP2A2_MOUSE	Ap2a2	AP2A2_MOUSE; Q3U7X9_MOUSE; Q69ZW4_MOUSE; Q6PEE6_MOUSE	A0A140LHA6_MOUSE; A0A140LHG0_MOUSE	sp|P17427|AP2A2_MOUSE AP-2 complex subunit alpha-2 OS=Mus musculus OX=10090 GN=Ap2a2 PE=1 SV=2	321.54	7.36	104017	59	7	3	7	3	7	3
2ABD_MOUSE	Ppp2r2d	2ABD_MOUSE	2ABB_MOUSE; A0A668KLA9_MOUSE; F6RV17_MOUSE; G3UXS9_MOUSE; Q8BVB4_MOUSE	sp|Q925E7|2ABD_MOUSE Serine/threonine-protein phosphatase 2A 55 kDa regulatory subunit B delta isoform OS=Mus musculus OX=10090 GN=Ppp2r2d PE=1 SV=1	298.81	16.78	51957	25	7	4	7	4	9	4
DNJA2_MOUSE	Dnaja2	DNJA2_MOUSE; Q3TFF0_MOUSE		sp|Q9QYJ0|DNJA2_MOUSE DnaJ homolog subfamily A member 2 OS=Mus musculus OX=10090 GN=Dnaja2 PE=1 SV=1	291.18	23.54	45746	25	7	7	7	7	9	9
F8VPU6_MOUSE	Usp9y	F8VPU6_MOUSE; Q91XW2_MOUSE		tr|F8VPU6|F8VPU6_MOUSE Ubiquitinyl hydrolase 1 OS=Mus musculus OX=10090 GN=Usp9y PE=1 SV=1	244.39	2.66	292267	142	7	1	7	1	8	1
Q99NC5_MOUSE	Actb	Q99NC5_MOUSE		tr|Q99NC5|Q99NC5_MOUSE Beta-actin FE-3 (Fragment) OS=Mus musculus OX=10090 GN=Actb PE=2 SV=1	507.46	55.22	14983	8	6	1	10	1	31	1
KPYM_MOUSE	Pkm	KPYM_MOUSE	A0A1L1SQV8_MOUSE; A0A1L1SSN6_MOUSE; A0A1L1ST52_MOUSE; A0A1L1STV8_MOUSE; A0A1L1SU37_MOUSE; A0A1L1SUV0_MOUSE	sp|P52480|KPYM_MOUSE Pyruvate kinase PKM OS=Mus musculus OX=10090 GN=Pkm PE=1 SV=4	444.03	18.08	57845	38	6	6	8	8	9	9
A0A075B5P4_MOUSE	Ighg1	A0A075B5P4_MOUSE; A0A0A6YWR2_MOUSE; A0A0B6VMB2_MOUSE; A0A0C6E3V3_MOUSE; A0A0M4KM70_MOUSE; A0A4U9FFL2_MOUSE; I6L985_MOUSE; U5LP42_MOUSE	IGH1M_MOUSE; IGHG1_MOUSE; Q99LC4_MOUSE	tr|A0A075B5P4|A0A075B5P4_MOUSE Ig gamma-1 chain C region secreted form (Fragment) OS=Mus musculus OX=10090 GN=Ighg1 PE=1 SV=1	347.57	25.62	35744	13	6	6	7	7	9	9
1433T_MOUSE	Ywhaq	1433T_MOUSE; A3KML3_MOUSE		sp|P68254|1433T_MOUSE 14-3-3 protein theta OS=Mus musculus OX=10090 GN=Ywhaq PE=1 SV=1	295.89	28.57	27778	18	6	5	7	6	17	15
A0A411P8U6_MOUSE	Mbp	A0A411P8U6_MOUSE	A0A498WGS3_MOUSE; MBP_MOUSE; Q09J72_MOUSE; Q3UGF3_MOUSE; Q542T4_MOUSE; Q5D096_MOUSE	tr|A0A411P8U6|A0A411P8U6_MOUSE Myelin basic protein (Fragment) OS=Mus musculus OX=10090 GN=Mbp PE=2 SV=1	268.87	19.39	31849	19	6	6	7	7	11	11
DYN1_MOUSE	Dnm1	A0A0J9YUE9_MOUSE; A0A0J9YUN4_MOUSE; DYN1_MOUSE	D6RH60_MOUSE; DYN2_MOUSE; DYN3_MOUSE; E9QLL2_MOUSE; F6W8Z8_MOUSE; F8WIV5_MOUSE; G3UY64_MOUSE; G3UZZ3_MOUSE; G3X9G4_MOUSE; Q3T9X3_MOUSE; Q3TBU6_MOUSE; Q3TCR7_MOUSE; Q8BUT2_MOUSE; Q9CUM4_MOUSE	sp|P39053|DYN1_MOUSE Dynamin-1 OS=Mus musculus OX=10090 GN=Dnm1 PE=1 SV=2	368.21	8.3	97803	58	6	6	6	6	6	6
HS71A_MOUSE	Hspa1a	A1E2B8_MOUSE; HS71A_MOUSE; HS71B_MOUSE; Q3TAI8_MOUSE; Q3TU85_MOUSE	O88687_MOUSE; O88688_MOUSE; Q61698_MOUSE; Q9R2A1_MOUSE	sp|Q61696|HS71A_MOUSE Heat shock 70 kDa protein 1A OS=Mus musculus OX=10090 GN=Hspa1a PE=1 SV=2	326.46	13.73	70079	37	6	3	6	3	23	4
HS90B_MOUSE	Hsp90ab1	HS90B_MOUSE; Q71LX8_MOUSE	D3Z1R1_MOUSE; E9PX27_MOUSE; E9Q0C3_MOUSE; E9Q3D6_MOUSE; ENPL_MOUSE; Q3UAD6_MOUSE; Q3UBU0_MOUSE; Q80YC2_MOUSE; Q811H6_MOUSE; Q8C2R2_MOUSE; Q91V38_MOUSE	sp|P11499|HS90B_MOUSE Heat shock protein HSP 90-beta OS=Mus musculus OX=10090 GN=Hsp90ab1 PE=1 SV=3	297.99	10.22	83281	38	6	3	6	3	7	3
GRP75_MOUSE	Hspa9	GRP75_MOUSE		sp|P38647|GRP75_MOUSE Stress-70 protein, mitochondrial OS=Mus musculus OX=10090 GN=Hspa9 PE=1 SV=3	291.88	11.49	73461	44	6	6	6	6	9	9
NCDN_MOUSE	Ncdn	NCDN_MOUSE		sp|Q9Z0E0|NCDN_MOUSE Neurochondrin OS=Mus musculus OX=10090 GN=Ncdn PE=1 SV=1	280.38	10.43	78895	38	6	6	6	6	8	8
DDX1_MOUSE	Ddx1	DDX1_MOUSE; Q3V1Z7_MOUSE	A0A1Y7VM48_MOUSE; Q922B8_MOUSE	sp|Q91VR5|DDX1_MOUSE ATP-dependent RNA helicase DDX1 OS=Mus musculus OX=10090 GN=Ddx1 PE=1 SV=1	269.68	10	82500	46	6	6	6	6	6	6
PDE4D_MOUSE	Pde4d	A2RSH1_MOUSE; B1PSD9_MOUSE; B2KF57_MOUSE; B2KF84_MOUSE; E9PVU7_MOUSE; F6QFD1_MOUSE; PDE4D_MOUSE	A6XDA6_MOUSE; A6XDA7_MOUSE; A6XDB0_MOUSE; A6XDB1_MOUSE; B1AWC8_MOUSE; B1AWC9_MOUSE; B1AWD0_MOUSE; B1AWD1_MOUSE; B2RTL2_MOUSE; C9K100_MOUSE; G3UWT3_MOUSE; G3UZ46_MOUSE; O70285_MOUSE; O70286_MOUSE; PDE4A_MOUSE; Q3TTI9_MOUSE; Q3TUD0_MOUSE; Q6IQY6_MOUSE; Q80VK8_MOUSE; Q8BQB2_MOUSE; Q8VBU5_MOUSE; Q91VY2_MOUSE; Q9QXI7_MOUSE	sp|Q01063|PDE4D_MOUSE cAMP-specific 3',5'-cyclic phosphodiesterase 4D OS=Mus musculus OX=10090 GN=Pde4d PE=1 SV=2	269.6	9.37	84563	41	6	6	6	6	6	6
Q8C153_MOUSE	Eef2	Q8C153_MOUSE	EF2_MOUSE; O89069_MOUSE; Q3TJZ1_MOUSE; Q3TK17_MOUSE; Q3TLB1_MOUSE; Q3TPG2_MOUSE; Q3TSK4_MOUSE; Q3TW58_MOUSE; Q3TWX1_MOUSE; Q3TX47_MOUSE; Q3UBL9_MOUSE; Q3UDC8_MOUSE; Q3UMI7_MOUSE; Q3UZ14_MOUSE; Q61509_MOUSE; Q6P9L9_MOUSE; Q8BMA8_MOUSE; Q99LT6_MOUSE	tr|Q8C153|Q8C153_MOUSE Tr-type G domain-containing protein OS=Mus musculus OX=10090 GN=Eef2 PE=2 SV=1	236.36	7.93	95258	53	6	6	6	6	6	6
AP1B1_MOUSE	Ap1b1	AP1B1_MOUSE; Q3TVN4_MOUSE; Q3U1K9_MOUSE; Q5SVG4_MOUSE; Q5SVG5_MOUSE; Q8CC13_MOUSE	Q6NXY3_MOUSE	sp|O35643|AP1B1_MOUSE AP-1 complex subunit beta-1 OS=Mus musculus OX=10090 GN=Ap1b1 PE=1 SV=2	235.13	8.7	103935	49	6	2	6	2	6	2
ACTBL_MOUSE	Actbl2	ACTBL_MOUSE	A0A0U1RQ96_MOUSE	sp|Q8BFZ3|ACTBL_MOUSE Beta-actin-like protein 2 OS=Mus musculus OX=10090 GN=Actbl2 PE=1 SV=1	227.01	27.66	42004	24	6	2	6	2	15	2
1433F_MOUSE	Ywhah	1433F_MOUSE	Q8BJH3_MOUSE	sp|P68510|1433F_MOUSE 14-3-3 protein eta OS=Mus musculus OX=10090 GN=Ywhah PE=1 SV=2	260.82	20.33	28212	18	5	5	9	9	15	15
E9PWE8_MOUSE	Dpysl3	E9PWE8_MOUSE	DPYL3_MOUSE; Q3TAS8_MOUSE; Q3TT92_MOUSE; Q71H74_MOUSE	tr|E9PWE8|E9PWE8_MOUSE Dihydropyrimidinase-related protein 3 OS=Mus musculus OX=10090 GN=Dpysl3 PE=1 SV=1	330.08	10.83	73884	41	5	3	6	3	28	22
#C#P19012		#C#P19012	#C#ENSEMBL:ENSP00000377550; #C#P08727; #C#P08730-1; #C#P13646-1; #C#P19001; B1AQ78_MOUSE; K1C13_MOUSE; K1C19_MOUSE	SWISS-PROT:P19012 Tax_Id=9606 Gene_Symbol=KRT15 Keratin, type I cytoskeletal 15	269.02	10.31	49168	34	5	2	5	2	10	2
K2C75_MOUSE	Krt75	#C#Q8BGZ7; K2C75_MOUSE	#C#P07744; #C#P08729; #C#Q14CN4-1; #C#Q3KNV1; #C#Q3SY84; #C#Q6IME9; #C#Q7RTS7; #C#Q9DCV7; #C#REFSEQ:XP_932229; A0A6B9SLG6_MOUSE; A0A6C0WZK9_MOUSE; E9Q1Z0_MOUSE; K2C4_MOUSE; K2C72_MOUSE; K2C7_MOUSE; KRT84_MOUSE; NFH_MOUSE; Q148Q7_MOUSE; Q80TQ3_MOUSE; Q8BIS2_MOUSE; Q99MH7_MOUSE	sp|Q8BGZ7|K2C75_MOUSE Keratin, type II cytoskeletal 75 OS=Mus musculus OX=10090 GN=Krt75 PE=1 SV=1	267.2	9.07	59741	36	5	1	5	1	12	1
EPMIP_MOUSE	Epm2aip1	EPMIP_MOUSE		sp|Q8VEH5|EPMIP_MOUSE EPM2A-interacting protein 1 OS=Mus musculus OX=10090 GN=Epm2aip1 PE=1 SV=1	246.53	10.23	70096	38	5	5	5	5	6	6
KCRB_MOUSE	Ckb	KCRB_MOUSE		sp|Q04447|KCRB_MOUSE Creatine kinase B-type OS=Mus musculus OX=10090 GN=Ckb PE=1 SV=1	239.94	18.37	42713	23	5	5	5	5	10	10
KIF1A_MOUSE	Kif1a	A0A087WQE8_MOUSE; E9Q9G6_MOUSE; E9QAN4_MOUSE; G3UW47_MOUSE; KIF1A_MOUSE; Q3UH16_MOUSE; Q6P5H4_MOUSE; Q6TA13_MOUSE	A0A5F8MPF0_MOUSE; F6XNB6_MOUSE; KIF1B_MOUSE; Q5DTN3_MOUSE	sp|P33173|KIF1A_MOUSE Kinesin-like protein KIF1A OS=Mus musculus OX=10090 GN=Kif1a PE=1 SV=2	206.47	3.89	191725	105	5	5	5	5	8	8
DNJA1_MOUSE	Dnaja1	DNJA1_MOUSE; Q3TK61_MOUSE; Q5NTY0_MOUSE	B1AXX9_MOUSE; B1AXY0_MOUSE; B1AXY1_MOUSE	sp|P63037|DNJA1_MOUSE DnaJ homolog subfamily A member 1 OS=Mus musculus OX=10090 GN=Dnaja1 PE=1 SV=1	204.45	14.86	44868	24	5	5	5	5	6	6
AP2B1_MOUSE	Ap2b1	AP2B1_MOUSE; H3BIY9_MOUSE; H3BKM0_MOUSE; Q5SWR1_MOUSE		sp|Q9DBG3|AP2B1_MOUSE AP-2 complex subunit beta OS=Mus musculus OX=10090 GN=Ap2b1 PE=1 SV=1	195.93	7.36	104583	48	5	1	5	1	7	3
AP2A1_MOUSE	Ap2a1	AP2A1_MOUSE	A0A140LHA6_MOUSE; A0A140LHG0_MOUSE	sp|P17426|AP2A1_MOUSE AP-2 complex subunit alpha-1 OS=Mus musculus OX=10090 GN=Ap2a1 PE=1 SV=1	178.78	4.71	107664	60	5	1	5	1	5	1
Q9CWS5_MOUSE		Q9CWS5_MOUSE	A8DUV1_MOUSE; Q61287_MOUSE	tr|Q9CWS5|Q9CWS5_MOUSE GLOBIN domain-containing protein OS=Mus musculus OX=10090 PE=2 SV=1	263.15	30.99	15090	8	4	1	5	1	14	3
#C#P00761		#C#P00761		SWISS-PROT:P00761|TRYP_PIG Trypsin - Sus scrofa (Pig).	247.51	25.97	24409	12	4	4	5	5	35	35
HBA_MOUSE	Hba	A8DUV3_MOUSE; HBA_MOUSE; Q8BPF4_MOUSE; Q91VB8_MOUSE; Q9CY06_MOUSE; Q9QWJ3_MOUSE	A8DUV1_MOUSE; Q61287_MOUSE; Q61649_MOUSE; Q9CY10_MOUSE	sp|P01942|HBA_MOUSE Hemoglobin subunit alpha OS=Mus musculus OX=10090 GN=Hba PE=1 SV=2	220.75	30.99	15085	8	4	1	5	1	17	6
1433B_MOUSE	Ywhab	1433B_MOUSE; A2A5N1_MOUSE; A2A5N2_MOUSE		sp|Q9CQV8|1433B_MOUSE 14-3-3 protein beta/alpha OS=Mus musculus OX=10090 GN=Ywhab PE=1 SV=3	150.57	19.51	28086	17	4	2	5	2	6	2
BIP_MOUSE	Hspa5	BIP_MOUSE; Q3TI47_MOUSE; Q3TKF8_MOUSE; Q3TWF2_MOUSE; Q3U6V3_MOUSE; Q3U7T8_MOUSE; Q3U9G2_MOUSE; Q3UEM8_MOUSE; Q9DC41_MOUSE	O88687_MOUSE; Q9QWU1_MOUSE	sp|P20029|BIP_MOUSE Endoplasmic reticulum chaperone BiP OS=Mus musculus OX=10090 GN=Hspa5 PE=1 SV=3	248	8.09	72422	38	4	2	4	2	20	2
PPM1E_MOUSE	Ppm1e	B2KGP3_MOUSE; PPM1E_MOUSE		sp|Q80TL0|PPM1E_MOUSE Protein phosphatase 1E OS=Mus musculus OX=10090 GN=Ppm1e PE=1 SV=2	242.78	7.21	83419	35	4	4	4	4	8	8
RUVB2_MOUSE	Ruvbl2	Q3TXT7_MOUSE; Q3UXP2_MOUSE; RUVB2_MOUSE	A0A1B0GRW3_MOUSE; A0A1B0GSR4_MOUSE; A0A1B0GT54_MOUSE	sp|Q9WTM5|RUVB2_MOUSE RuvB-like 2 OS=Mus musculus OX=10090 GN=Ruvbl2 PE=1 SV=3	227.15	11.02	51113	29	4	4	4	4	5	5
GUAD_MOUSE	Gda	GUAD_MOUSE; Q3U0C4_MOUSE; Q548F2_MOUSE; Q69ZN0_MOUSE; Q71RH5_MUSMC; Q71RH6_MUSMM	A0A494B982_MOUSE; D3YU09_MOUSE; Q6DFY1_MOUSE; Q8BRJ7_MOUSE	sp|Q9R111|GUAD_MOUSE Guanine deaminase OS=Mus musculus OX=10090 GN=Gda PE=1 SV=1	197.38	9.25	51013	27	4	4	4	4	6	6
K2C79_MOUSE	Krt79	#C#Q8VED5; K2C79_MOUSE	#C#H-INV:HIT000016045; #C#P05787; #C#P08729; #C#Q14CN4-1; #C#Q3KNV1; #C#Q3SY84; #C#Q6IME9; #C#Q9DCV7; K2C72_MOUSE; K2C7_MOUSE; KRT84_MOUSE	sp|Q8VED5|K2C79_MOUSE Keratin, type II cytoskeletal 79 OS=Mus musculus OX=10090 GN=Krt79 PE=1 SV=2	194.82	8.1	57552	32	4	1	4	1	7	1
EIF3L_MOUSE	Eif3l	EIF3L_MOUSE		sp|Q8QZY1|EIF3L_MOUSE Eukaryotic translation initiation factor 3 subunit L OS=Mus musculus OX=10090 GN=Eif3l PE=1 SV=1	194.63	8.16	66613	32	4	4	4	4	4	4
DCLK1_MOUSE	Dclk1	A0A0G2JGQ6_MOUSE; A3KN70_MOUSE; DCLK1_MOUSE; Q8CHG1_MOUSE	A0A0G2JE54_MOUSE; A0A0G2JEN4_MOUSE; A0A0G2JGH1_MOUSE; A0A0G2JGR9_MOUSE; A8IP62_MOUSE; H7BX36_MOUSE; Q1EDH1_MOUSE; Q3UGP0_MOUSE; Q80VB6_MOUSE; Q8BQN2_MOUSE; Q8BRN4_MOUSE; Q8CCN4_MOUSE; Q8VDT3_MOUSE; Q9JLM6_MOUSE; Q9JLM7_MOUSE	sp|Q9JLM8|DCLK1_MOUSE Serine/threonine-protein kinase DCLK1 OS=Mus musculus OX=10090 GN=Dclk1 PE=1 SV=1	194.44	6.22	84153	40	4	4	4	4	4	4
K22O_MOUSE	Krt76	K22O_MOUSE	#C#P07744; #C#P08729; #C#Q14CN4-1; #C#Q3KNV1; #C#Q3SY84; #C#Q6IME9; #C#Q7RTS7; #C#Q9DCV7; #C#REFSEQ:XP_932229; E9Q1Z0_MOUSE; K2C4_MOUSE; K2C72_MOUSE; K2C7_MOUSE; KRT84_MOUSE; NFH_MOUSE; Q148Q7_MOUSE; Q80TQ3_MOUSE; Q8BIS2_MOUSE	sp|Q3UV17|K22O_MOUSE Keratin, type II cytoskeletal 2 oral OS=Mus musculus OX=10090 GN=Krt76 PE=1 SV=1	190.55	6.23	62845	40	4	1	4	1	7	3
TCPE_MOUSE	Cct5	E0CZA1_MOUSE; TCPE_MOUSE		sp|P80316|TCPE_MOUSE T-complex protein 1 subunit epsilon OS=Mus musculus OX=10090 GN=Cct5 PE=1 SV=1	177.36	7.76	59624	37	4	4	4	4	4	4
TPIS_MOUSE	Tpi1	TPIS_MOUSE	H7BXC3_MOUSE	sp|P17751|TPIS_MOUSE Triosephosphate isomerase OS=Mus musculus OX=10090 GN=Tpi1 PE=1 SV=5	176.11	19.28	26713	15	4	4	4	4	9	9
CSN1_MOUSE	Gps1	B1ATU4_MOUSE; CSN1_MOUSE; G3UXW9_MOUSE; Q3MIA8_MOUSE	A0A140LJB7_MOUSE	sp|Q99LD4|CSN1_MOUSE COP9 signalosome complex subunit 1 OS=Mus musculus OX=10090 GN=Gps1 PE=1 SV=1	168.55	8.28	53442	26	4	4	4	4	5	5
FXL16_MOUSE	Fbxl16	B2RPY3_MOUSE; FXL16_MOUSE		sp|A2RT62|FXL16_MOUSE F-box/LRR-repeat protein 16 OS=Mus musculus OX=10090 GN=Fbxl16 PE=1 SV=1	165.03	10.23	51878	25	4	4	4	4	5	5
RS3_MOUSE	Rps3	Q3UCL7_MOUSE; Q5YLW3_MOUSE; Q9CZP6_MOUSE; RS3_MOUSE	A0A140LI77_MOUSE; D3YV43_MOUSE; O89068_MOUSE; Q3UK56_MOUSE; Q9D0A2_MOUSE	sp|P62908|RS3_MOUSE 40S ribosomal protein S3 OS=Mus musculus OX=10090 GN=Rps3 PE=1 SV=1	164.46	19.34	26674	19	4	4	4	4	7	7
#C#Q32MB2		#C#Q32MB2	#C#P08729; #C#Q14CN4-1; #C#Q3KNV1; #C#Q3SY84; #C#Q6IME9; #C#Q7RTS7; #C#Q9DCV7; E9Q1Z0_MOUSE; K2C72_MOUSE; K2C7_MOUSE; KRT84_MOUSE; NFH_MOUSE; Q148Q7_MOUSE; Q80TQ3_MOUSE; Q8BIS2_MOUSE	TREMBL:Q32MB2;Q86Y46 Tax_Id=9606 Gene_Symbol=KRT73 Keratin-73	163.99	7.04	58923	34	4	2	4	2	10	7
NUCL_MOUSE	Ncl	NUCL_MOUSE; Q3TGR3_MOUSE; Q3TL52_MOUSE; Q3TT41_MOUSE; Q8CD23_MOUSE; Q8CE30_MOUSE	Q9CT46_MOUSE	sp|P09405|NUCL_MOUSE Nucleolin OS=Mus musculus OX=10090 GN=Ncl PE=1 SV=2	157.6	5.52	76723	47	4	4	4	4	4	4
PI51C_MOUSE	Pip5k1c	F8WHW6_MOUSE; PI51C_MOUSE	F7C0X9_MOUSE	sp|O70161|PI51C_MOUSE Phosphatidylinositol 4-phosphate 5-kinase type-1 gamma OS=Mus musculus OX=10090 GN=Pip5k1c PE=1 SV=2	145.02	7.11	72408	32	4	4	4	4	4	4
G3P_MOUSE	Gapdh	A0A0A0MQF6_MOUSE; D2KHZ9_MOUSE; G3P_MOUSE; Q3TUZ9_MOUSE; S4R1W1_MOUSE	A0A0R4J0X7_MOUSE; A0A1D5RLD8_MOUSE; G3PT_MOUSE; Q3V2I5_MOUSE; Q4VBD1_MOUSE; Q8CEV2_MOUSE; S4R257_MOUSE; S4R2G5_MOUSE; V9GX06_MOUSE	sp|P16858|G3P_MOUSE Glyceraldehyde-3-phosphate dehydrogenase OS=Mus musculus OX=10090 GN=Gapdh PE=1 SV=2	140.83	12.31	35810	21	4	4	4	4	8	8
DPYL1_MOUSE	Crmp1	DPYL1_MOUSE; Q3TXY0_MOUSE; Q6P1J1_MOUSE	Q3TY94_MOUSE	sp|P97427|DPYL1_MOUSE Dihydropyrimidinase-related protein 1 OS=Mus musculus OX=10090 GN=Crmp1 PE=1 SV=1	256.18	6.64	62168	36	3	2	4	2	12	7
KCC2G_MOUSE	Camk2g	A0A2I3BQP6_MOUSE; KCC2G_MOUSE; Q6ZWS7_MOUSE	A0A286YCB8_MOUSE; A0A286YCH4_MOUSE; A0A286YCW8_MOUSE; A0A286YDK9_MOUSE; A0A286YDL6_MOUSE; Q8BW40_MOUSE	sp|Q923T9|KCC2G_MOUSE Calcium/calmodulin-dependent protein kinase type II subunit gamma OS=Mus musculus OX=10090 GN=Camk2g PE=1 SV=1	246.46	7.18	59607	28	3	1	4	1	5	1
HBB1_MOUSE	Hbb-b1	A8DUK0_MOUSE; A8DUM2_MOUSE; A8DUP3_MOUSE; A8DUP5_MOUSE; A8DUP7_MOUSE; B1Q450_MOUSE; D0U269_MUSMC; D0U270_MUSMC; HBB1_MOUSE	A8DUK2_MOUSE; A8DUK4_MOUSE; A8DUK7_MOUSE; A8DUL0_MOUSE; A8DUL2_MOUSE; A8DUL5_MOUSE; A8DUL7_MOUSE; A8DUN2_MOUSE; A8DUP0_MOUSE; A8DUQ1_MOUSE; A8DUQ5_MOUSE; D4N6R6_MUSMC; D4N6V9_MUSMC; E9Q223_MOUSE; Q61348_MOUSE; Q61650_MOUSE	sp|P02088|HBB1_MOUSE Hemoglobin subunit beta-1 OS=Mus musculus OX=10090 GN=Hbb-b1 PE=1 SV=2	238.25	29.93	15840	11	3	1	4	2	15	4
KCC2D_MOUSE	Camk2d	A0A0G2JGS4_MOUSE; E9Q1T1_MOUSE; E9Q1V9_MOUSE; E9Q1W0_MOUSE; KCC2D_MOUSE	D6RDQ8_MOUSE; E9PXV3_MOUSE; E9QAJ4_MOUSE; F6RWZ9_MOUSE; O70459_MOUSE; Q3V1X9_MOUSE; Q8C4I3_MOUSE; Q8C8X9_MOUSE; Q8CCM0_MOUSE	sp|Q6PHZ2|KCC2D_MOUSE Calcium/calmodulin-dependent protein kinase type II subunit delta OS=Mus musculus OX=10090 GN=Camk2d PE=1 SV=1	225.16	7.21	56369	29	3	2	4	2	6	2
D5MR34_MOUSE	Tubb3	D5MR34_MOUSE		tr|D5MR34|D5MR34_MOUSE Tubulin beta chain (Fragment) OS=Mus musculus OX=10090 GN=Tubb3 PE=3 SV=1	217.28	24.06	14528	6	3	1	4	1	14	2
TCPQ_MOUSE	Cct8	Q3UKQ2_MOUSE; Q3UL22_MOUSE; Q6A0F1_MOUSE; Q9CS06_MOUSE; Q9WVS5_MOUSE; TCPQ_MOUSE	H3BJB6_MOUSE; H3BKG2_MOUSE; H3BL49_MOUSE; H3BLL1_MOUSE; Q8BVY8_MOUSE	sp|P42932|TCPQ_MOUSE T-complex protein 1 subunit theta OS=Mus musculus OX=10090 GN=Cct8 PE=1 SV=3	197.72	6.02	59555	40	3	3	3	3	3	3
D4N6U4_MUSMC	Hbbt1	D4N6U4_MUSMC	A8DUQ5_MOUSE; A8DV41_MOUSE; A8DV59_MOUSE; D0U284_MUSMC; D0U285_MUSMC; D0U293_MOUSE; D4N6M2_MUSMC; D4N6N2_MUSMC; D4N6N9_MUSMC; HBB2_MOUSE; Q549D9_MOUSE; Q54AH9_MOUSE; Q61348_MOUSE; Q61650_MOUSE; Q9QUN8_MOUSE	tr|D4N6U4|D4N6U4_MUSMC Beta-globin OS=Mus musculus castaneus OX=10091 GN=Hbbt1 PE=3 SV=1	190.56	29.93	15880	11	3	1	3	1	12	1
PFKAP_MOUSE	Pfkp	PFKAP_MOUSE; Q8C605_MOUSE	F6YL81_MOUSE; PFKAL_MOUSE; Q1LZL7_MOUSE; Q8C8E8_MOUSE; Q9D255_MOUSE	sp|Q9WUA3|PFKAP_MOUSE ATP-dependent 6-phosphofructokinase, platelet type OS=Mus musculus OX=10090 GN=Pfkp PE=1 SV=1	180.41	4.97	85455	37	3	2	3	2	3	2
TIF1B_MOUSE	Trim28	Q5EBP9_MOUSE; TIF1B_MOUSE	Q3UDN8_MOUSE	sp|Q62318|TIF1B_MOUSE Transcription intermediary factor 1-beta OS=Mus musculus OX=10090 GN=Trim28 PE=1 SV=3	161.23	7.19	88847	37	3	3	3	3	4	4
COF1_MOUSE	Cfl1	A0A494B9A7_MOUSE; COF1_MOUSE; F8WGL3_MOUSE; Q544Y7_MOUSE; Q9CX22_MOUSE	COF2_MOUSE; Q3UHW9_MOUSE	sp|P18760|COF1_MOUSE Cofilin-1 OS=Mus musculus OX=10090 GN=Cfl1 PE=1 SV=3	158.32	20.48	18560	12	3	3	3	3	5	5
KCD16_MOUSE	Kctd16	KCD16_MOUSE	A0A494BB17_MOUSE	sp|Q5DTY9|KCD16_MOUSE BTB/POZ domain-containing protein KCTD16 OS=Mus musculus OX=10090 GN=Kctd16 PE=1 SV=2	156.43	8.2	48972	25	3	3	3	3	4	4
HAP1_MOUSE	Hap1	HAP1_MOUSE	G3UXU7_MOUSE; G3UYE4_MOUSE	sp|O35668|HAP1_MOUSE Huntingtin-associated protein 1 OS=Mus musculus OX=10090 GN=Hap1 PE=1 SV=1	150.25	4.94	70116	35	3	3	3	3	3	3
K2C8_MOUSE	Krt8	K2C8_MOUSE	#C#H-INV:HIT000016045; #C#P05787; #C#P08729; #C#Q14CN4-1; #C#Q3KNV1; #C#Q3SY84; #C#Q6IME9; #C#Q9DCV7; K2C72_MOUSE; K2C7_MOUSE; KRT84_MOUSE	sp|P11679|K2C8_MOUSE Keratin, type II cytoskeletal 8 OS=Mus musculus OX=10090 GN=Krt8 PE=1 SV=4	150.05	4.9	54565	33	3	1	3	1	4	1
SPN90_MOUSE	Nckipsd	SPN90_MOUSE		sp|Q9ESJ4|SPN90_MOUSE NCK-interacting protein with SH3 domain OS=Mus musculus OX=10090 GN=Nckipsd PE=1 SV=2	145.52	4.34	78572	35	3	3	3	3	3	3
#C#Q99456		#C#Q99456	K1C12_MOUSE; Z4YJD9_MOUSE	SWISS-PROT:Q99456 Tax_Id=9606 Gene_Symbol=KRT12 Keratin, type I cytoskeletal 12	143.65	5.47	53511	28	3	2	3	2	4	2
DREB_MOUSE	Dbn1	A0A0R4J1E3_MOUSE; DREB_MOUSE; Q3TRK3_MOUSE		sp|Q9QXS6|DREB_MOUSE Drebrin OS=Mus musculus OX=10090 GN=Dbn1 PE=1 SV=4	143.14	6.66	77287	30	3	3	3	3	3	3
T11L1_MOUSE	Tcp11l1	T11L1_MOUSE		sp|Q8BTG3|T11L1_MOUSE T-complex protein 11-like protein 1 OS=Mus musculus OX=10090 GN=Tcp11l1 PE=1 SV=1	142.29	6.88	56332	29	3	3	3	3	3	3
D3Z6I8_MOUSE	Tpm3	D3Z6I8_MOUSE; E9Q7Q3_MOUSE; Q58E70_MOUSE; Q8C7C3_MOUSE	D3Z2H9_MOUSE; Q3TJ53_MOUSE	tr|D3Z6I8|D3Z6I8_MOUSE Tropomyosin alpha-3 chain OS=Mus musculus OX=10090 GN=Tpm3 PE=1 SV=1	137.54	14.17	28723	22	3	2	3	2	5	2
CYC_MOUSE	Cycs	CYC_MOUSE; Q56A15_MOUSE		sp|P62897|CYC_MOUSE Cytochrome c, somatic OS=Mus musculus OX=10090 GN=Cycs PE=1 SV=2	134.59	25.71	11605	8	3	2	3	2	5	3
PP2AA_MOUSE	Ppp2ca	PP2AA_MOUSE; PP2AB_MOUSE; Q8BN07_MOUSE; Q8VED4_MOUSE	PP4C_MOUSE; Q3UNF2_MOUSE	sp|P63330|PP2AA_MOUSE Serine/threonine-protein phosphatase 2A catalytic subunit alpha isoform OS=Mus musculus OX=10090 GN=Ppp2ca PE=1 SV=1	131.37	13.27	35608	18	3	3	3	3	5	5
AATC_MOUSE	Got1	AATC_MOUSE	F7ALS6_MOUSE	sp|P05201|AATC_MOUSE Aspartate aminotransferase, cytoplasmic OS=Mus musculus OX=10090 GN=Got1 PE=1 SV=3	127.39	7.26	46248	27	3	3	3	3	4	4
LANC1_MOUSE	Lancl1	B2KGR2_MOUSE; LANC1_MOUSE	Q8CHW0_MOUSE	sp|O89112|LANC1_MOUSE Glutathione S-transferase LANCL1 OS=Mus musculus OX=10090 GN=Lancl1 PE=1 SV=1	126.44	7.02	45341	21	3	3	3	3	3	3
CH60_MOUSE	Hspd1	CH60_MOUSE	D3Z2F2_MOUSE	sp|P63038|CH60_MOUSE 60 kDa heat shock protein, mitochondrial OS=Mus musculus OX=10090 GN=Hspd1 PE=1 SV=1	123.71	6.28	60955	36	3	3	3	3	3	3
PROF2_MOUSE	Pfn2	D3YWS3_MOUSE; PROF2_MOUSE		sp|Q9JJV2|PROF2_MOUSE Profilin-2 OS=Mus musculus OX=10090 GN=Pfn2 PE=1 SV=3	118.88	21.43	15032	8	3	3	3	3	5	5
CSN4_MOUSE	Cops4	CSN4_MOUSE; Q14AI7_MOUSE; Q3TIJ1_MOUSE	D3YV99_MOUSE; D3Z1R9_MOUSE; F6QTS1_MOUSE	sp|O88544|CSN4_MOUSE COP9 signalosome complex subunit 4 OS=Mus musculus OX=10090 GN=Cops4 PE=1 SV=1	117.64	8.37	46285	28	3	3	3	3	5	5
GDIA_MOUSE	Gdi1	GDIA_MOUSE	B7FAU8_MOUSE; D6RI86_MOUSE	sp|P50396|GDIA_MOUSE Rab GDP dissociation inhibitor alpha OS=Mus musculus OX=10090 GN=Gdi1 PE=1 SV=3	117.01	7.38	50522	27	3	3	3	3	3	3
G6PI_MOUSE	Gpi	B2RXT5_MOUSE; B7ZWL9_MOUSE; G6PI_MOUSE	#C#Q3ZBD7; A0A0U1RP97_MOUSE; A0A0U1RQ72_MOUSE	sp|P06745|G6PI_MOUSE Glucose-6-phosphate isomerase OS=Mus musculus OX=10090 GN=Gpi PE=1 SV=4	111.9	5.73	62767	33	3	3	3	3	3	3
EMAL2_MOUSE	Eml2	E9QK48_MOUSE; EMAL2_MOUSE	D6RGM3_MOUSE	sp|Q7TNG5|EMAL2_MOUSE Echinoderm microtubule-associated protein-like 2 OS=Mus musculus OX=10090 GN=Eml2 PE=1 SV=1	111.81	5.55	70734	31	3	3	3	3	4	4
#C#P62894		#C#P62894	CYC2_MOUSE; G4XXT0_MOUSE; Q6PBG3_MOUSE	SWISS-PROT:P62894 Cytochrome c - Bos taurus (Bovine).	109.6	24.76	11704	8	3	2	3	2	6	4
RTCB_MOUSE	Rtcb	Q3TJ01_MOUSE; RTCB_MOUSE		sp|Q99LF4|RTCB_MOUSE RNA-splicing ligase RtcB homolog OS=Mus musculus OX=10090 GN=Rtcb PE=1 SV=1	107.33	5.54	55249	29	3	3	3	3	3	3
TCPD_MOUSE	Cct4	G5E839_MOUSE; Q3TII0_MOUSE; Q3UJZ8_MOUSE; Q564F4_MOUSE; TCPD_MOUSE		sp|P80315|TCPD_MOUSE T-complex protein 1 subunit delta OS=Mus musculus OX=10090 GN=Cct4 PE=1 SV=3	106.51	5.38	58066	38	3	3	3	3	3	3
COR1C_MOUSE	Coro1c	COR1C_MOUSE; Q3TEU8_MOUSE; Q3TF74_MOUSE; Q5PPQ7_MOUSE	A1ILN2_MOUSE; B9EIZ7_MOUSE; CORO6_MOUSE; Q3U8F0_MOUSE	sp|Q9WUM4|COR1C_MOUSE Coronin-1C OS=Mus musculus OX=10090 GN=Coro1c PE=1 SV=2	103.3	6.96	53121	24	3	3	3	3	3	3
UBR4_MOUSE	Ubr4	UBR4_MOUSE	F6SSP6_MOUSE	sp|A2AN08|UBR4_MOUSE E3 ubiquitin-protein ligase UBR4 OS=Mus musculus OX=10090 GN=Ubr4 PE=1 SV=1	96.15	0.66	572290	264	3	3	3	3	3	3
VATE1_MOUSE	Atp6v1e1	VATE1_MOUSE	A0A0N4SW07_MOUSE; A0A0N4SW34_MOUSE; A0A0N4SWA3_MOUSE; VATE2_MOUSE	sp|P50518|VATE1_MOUSE V-type proton ATPase subunit E 1 OS=Mus musculus OX=10090 GN=Atp6v1e1 PE=1 SV=2	94.01	13.27	26157	16	3	3	3	3	3	3
DNM1L_MOUSE	Dnm1l	DNM1L_MOUSE; E9PUD2_MOUSE	A0A2U3TZ67_MOUSE; Q3U4P3_MOUSE	sp|Q8K1M6|DNM1L_MOUSE Dynamin-1-like protein OS=Mus musculus OX=10090 GN=Dnm1l PE=1 SV=2	93.95	3.91	82658	54	3	3	3	3	3	3
Q3UGZ4_MOUSE	Sptbn2	Q3UGZ4_MOUSE; Q68FG2_MOUSE; Q6A087_MOUSE	Q68FM2_MOUSE; Q80ZK2_MOUSE	tr|Q3UGZ4|Q3UGZ4_MOUSE Spectrin beta chain OS=Mus musculus OX=10090 GN=Sptbn2 PE=2 SV=1	92.15	1.42	270935	162	3	3	3	3	4	4
UBP5_MOUSE	Usp5	Q3U4W8_MOUSE; UBP5_MOUSE	D3YYA5_MOUSE; D3Z4K7_MOUSE	sp|P56399|UBP5_MOUSE Ubiquitin carboxyl-terminal hydrolase 5 OS=Mus musculus OX=10090 GN=Usp5 PE=1 SV=1	90.34	3.73	95833	45	3	3	3	3	3	3
TITIN_MOUSE	Ttn	A0A5K1VVQ9_MOUSE; E9Q8K5_MOUSE; E9Q8N1_MOUSE; TITIN_MOUSE	A0A5K1VVQ1_MOUSE; A2AT70_MOUSE; F7CR78_MOUSE	sp|A2ASS6|TITIN_MOUSE Titin OS=Mus musculus OX=10090 GN=Ttn PE=1 SV=1	89.51	0.09	3906488	2351	3	3	3	3	3	3
RUVB1_MOUSE	Ruvbl1	Q3U1C2_MOUSE; Q3UJN2_MOUSE; RUVB1_MOUSE	D3YW60_MOUSE	sp|P60122|RUVB1_MOUSE RuvB-like 1 OS=Mus musculus OX=10090 GN=Ruvbl1 PE=1 SV=1	88.27	8.55	50214	24	3	3	3	3	3	3
ASGL1_MOUSE	Asrgl1	ASGL1_MOUSE		sp|Q8C0M9|ASGL1_MOUSE Isoaspartyl peptidase/L-asparaginase OS=Mus musculus OX=10090 GN=Asrgl1 PE=1 SV=1	87.31	11.35	33950	16	3	3	3	3	4	4
DMXL2_MOUSE	Dmxl2	B0V2P5_MOUSE; DMXL2_MOUSE	B0V2P6_MOUSE; F6RYL8_MOUSE	sp|Q8BPN8|DMXL2_MOUSE DmX-like protein 2 OS=Mus musculus OX=10090 GN=Dmxl2 PE=1 SV=3	86.84	1.32	338209	151	3	3	3	3	3	3
MLP3A_MOUSE	Map1lc3a	MLP3A_MOUSE		sp|Q91VR7|MLP3A_MOUSE Microtubule-associated proteins 1A/1B light chain 3A OS=Mus musculus OX=10090 GN=Map1lc3a PE=1 SV=1	82.73	21.49	14272	6	3	3	3	3	6	6
NBEA_MOUSE	Nbea	NBEA_MOUSE	Q8BSM6_MOUSE; Q8CBR4_MOUSE	sp|Q9EPN1|NBEA_MOUSE Neurobeachin OS=Mus musculus OX=10090 GN=Nbea PE=1 SV=1	81.85	1.09	326743	163	3	2	3	2	3	2
F7D439_MOUSE	Asl	F7D439_MOUSE	ARLY_MOUSE; Q3UUH0_MOUSE	Argininosuccinate lyase (Fragment) OS=Mus musculus OX=10090 GN=Asl PE=1 SV=2	95.07	7.87	29426	15	2	2	4	4	9	9
DNJB6_MOUSE	Dnajb6	A0A0G2JER9_MOUSE; DNJB6_MOUSE; G3X8S5_MOUSE; Q9DAN5_MOUSE	A0A0G2JEI3_MOUSE; A0A0G2JGN9_MOUSE; DNJB7_MOUSE; Q3MI09_MOUSE; Q3MI10_MOUSE	sp|O54946|DNJB6_MOUSE DnaJ homolog subfamily B member 6 OS=Mus musculus OX=10090 GN=Dnajb6 PE=1 SV=4	169.84	6.58	39807	17	2	2	3	3	4	4
#C#Q7Z3Y9		#C#Q7Z3Y9	#C#Q148H6; #C#Q3ZAW8; #C#Q7Z3Y7; #C#Q7Z3Y8; #C#Q7Z3Z0; #C#Q9Z2K1; B2RU72_MOUSE; K1C16_MOUSE; K1C25_MOUSE; K1C27_MOUSE; Q3SYP5_MOUSE; Q3ZAW8_MOUSE; Q9EQD6_MOUSE; Q9EQD7_MOUSE	SWISS-PROT:Q7Z3Y9 Tax_Id=9606 Gene_Symbol=KRT26 Keratin, type I cytoskeletal 26	120.71	3.85	51911	24	2	1	3	1	9	1
PPIA_MOUSE	Ppia	A0A1L1SST0_MOUSE; PPIA_MOUSE; Q3TE63_MOUSE; Q3UAJ1_MOUSE; Q5SVY2_MOUSE; Q9CZK9_MOUSE		sp|P17742|PPIA_MOUSE Peptidyl-prolyl cis-trans isomerase A OS=Mus musculus OX=10090 GN=Ppia PE=1 SV=2	120.02	16.46	17971	14	2	2	3	3	6	6
RGPA2_MOUSE	Ralgapa2	A0A0A0MQD7_MOUSE; A0A2I3BPN8_MOUSE; F7CGP0_MOUSE; RGPA2_MOUSE	F7AI67_MOUSE	sp|A3KGS3|RGPA2_MOUSE Ral GTPase-activating protein subunit alpha-2 OS=Mus musculus OX=10090 GN=Ralgapa2 PE=1 SV=2	102.02	0.96	210288	107	2	2	3	3	7	7
F6UC55_MOUSE	Kcnq2	F6UC55_MOUSE	A0A0G2JFQ2_MOUSE; B7ZBV3_MOUSE; B7ZBV4_MOUSE; B7ZBV5_MOUSE; B7ZBV6_MOUSE; B7ZBV7_MOUSE; B7ZBV8_MOUSE; B7ZBV9_MOUSE; B7ZBW1_MOUSE; B7ZBW2_MOUSE; E9Q9F1_MOUSE; G3UYG5_MOUSE; G3UYP4_MOUSE; KCNQ2_MOUSE; KCNQ4_MOUSE; KCNQ5_MOUSE; Q3UY10_MOUSE	tr|F6UC55|F6UC55_MOUSE Potassium voltage-gated channel subfamily KQT member 2 (Fragment) OS=Mus musculus OX=10090 GN=Kcnq2 PE=1 SV=1	85.24	3.02	88155	48	2	2	3	3	6	6
EFTU_MOUSE	Tufm	EFTU_MOUSE	A0A0U1RNQ6_MOUSE; A0A0U1RPC4_MOUSE	sp|Q8BFR5|EFTU_MOUSE Elongation factor Tu, mitochondrial OS=Mus musculus OX=10090 GN=Tufm PE=1 SV=1	145.96	4.87	49508	32	2	2	2	2	2	2
SYN2_MOUSE	Syn2	SYN2_MOUSE	Q8CE19_MOUSE; W8QPF2_MOUSE	sp|Q64332|SYN2_MOUSE Synapsin-2 OS=Mus musculus OX=10090 GN=Syn2 PE=1 SV=2	126.38	5.97	63373	32	2	1	2	1	2	1
K0513_MOUSE	Kiaa0513	K0513_MOUSE; Q3TA40_MOUSE; Q8BQB5_MOUSE	D3YUS2_MOUSE	sp|Q8R0A7|K0513_MOUSE Uncharacterized protein KIAA0513 OS=Mus musculus OX=10090 GN=Kiaa0513 PE=1 SV=1	123.13	5.41	46318	23	2	2	2	2	2	2
RL22_MOUSE	Rpl22	Q4VAG4_MOUSE; RL22_MOUSE		sp|P67984|RL22_MOUSE 60S ribosomal protein L22 OS=Mus musculus OX=10090 GN=Rpl22 PE=1 SV=2	123.09	19.53	14759	6	2	2	2	2	2	2
RBX1_MOUSE	Rbx1	A0A2R8W6R3_MOUSE; RBX1_MOUSE		sp|P62878|RBX1_MOUSE E3 ubiquitin-protein ligase RBX1 OS=Mus musculus OX=10090 GN=Rbx1 PE=1 SV=1	115.84	17.59	12274	4	2	2	2	2	2	2
GDS1_MOUSE	Rap1gds1	GDS1_MOUSE	A0A0G2JF70_MOUSE; A0A0G2JGC8_MOUSE; Q3TYN8_MOUSE; Q8BKH0_MOUSE	sp|E9Q912|GDS1_MOUSE Rap1 GTPase-GDP dissociation stimulator 1 OS=Mus musculus OX=10090 GN=Rap1gds1 PE=2 SV=1	112.43	3.62	66076	38	2	2	2	2	2	2
PP2BA_MOUSE	Ppp3ca	B2RRX2_MOUSE; PP2BA_MOUSE; Q4V9X0_MOUSE		sp|P63328|PP2BA_MOUSE Serine/threonine-protein phosphatase 2B catalytic subunit alpha isoform OS=Mus musculus OX=10090 GN=Ppp3ca PE=1 SV=1	105.83	4.22	58644	27	2	1	2	1	3	1
ALDOC_MOUSE	Aldoc	ALDOC_MOUSE		sp|P05063|ALDOC_MOUSE Fructose-bisphosphate aldolase C OS=Mus musculus OX=10090 GN=Aldoc PE=1 SV=4	100.44	6.34	39395	24	2	2	2	2	3	3
HARS1_MOUSE	Hars1	HARS1_MOUSE; Q3U890_MOUSE; Q3UDH1_MOUSE; Q8C2D1_MOUSE; Q8VDX8_MOUSE; Q9D094_MOUSE	A0A494B9A1_MOUSE; G5E823_MOUSE; SYHM_MOUSE	sp|Q61035|HARS1_MOUSE Histidine--tRNA ligase, cytoplasmic OS=Mus musculus OX=10090 GN=Hars1 PE=1 SV=2	100.13	3.54	57432	35	2	2	2	2	2	2
PP2BB_MOUSE	Ppp3cb	A0A6B9EQU3_MOUSE; E0CZ78_MOUSE; E9Q6P2_MOUSE; G3X8U7_MOUSE; PP2BB_MOUSE; Q3UXV4_MOUSE		sp|P48453|PP2BB_MOUSE Serine/threonine-protein phosphatase 2B catalytic subunit beta isoform OS=Mus musculus OX=10090 GN=Ppp3cb PE=1 SV=2	98.67	4.19	59173	27	2	1	2	1	3	1
THIO_MOUSE	Txn	THIO_MOUSE		sp|P10639|THIO_MOUSE Thioredoxin OS=Mus musculus OX=10090 GN=Txn PE=1 SV=3	98.5	22.86	11675	7	2	2	2	2	6	6
GSTM1_MOUSE	Gstm1	A2AE89_MOUSE; F6WHQ7_MOUSE; GSTM1_MOUSE	A2AE91_MOUSE; D3YVP5_MOUSE; D3YVP6_MOUSE; D3YX76_MOUSE; D3YZ29_MOUSE; E9PVM7_MOUSE; E9QAC8_MOUSE; GSTM2_MOUSE; GSTM4_MOUSE; GSTM7_MOUSE; Q6PJ91_MOUSE	sp|P10649|GSTM1_MOUSE Glutathione S-transferase Mu 1 OS=Mus musculus OX=10090 GN=Gstm1 PE=1 SV=2	97	9.63	25970	17	2	1	2	1	5	2
ACON_MOUSE	Aco2	ACON_MOUSE		sp|Q99KI0|ACON_MOUSE Aconitate hydratase, mitochondrial OS=Mus musculus OX=10090 GN=Aco2 PE=1 SV=1	95.4	2.95	85464	44	2	2	2	2	2	2
MLF2_MOUSE	Mlf2	MLF2_MOUSE; Q3UNV7_MOUSE; Q3URS8_MOUSE		sp|Q99KX1|MLF2_MOUSE Myeloid leukemia factor 2 OS=Mus musculus OX=10090 GN=Mlf2 PE=1 SV=1	94.24	8.5	28055	11	2	2	2	2	4	4
LANC2_MOUSE	Lancl2	F6RJV6_MOUSE; LANC2_MOUSE		sp|Q9JJK2|LANC2_MOUSE LanC-like protein 2 OS=Mus musculus OX=10090 GN=Lancl2 PE=1 SV=1	93.74	4.67	50777	26	2	2	2	2	2	2
SYN1_MOUSE	Syn1	SYN1_MOUSE	Q8CE19_MOUSE; W8QPF2_MOUSE	sp|O88935|SYN1_MOUSE Synapsin-1 OS=Mus musculus OX=10090 GN=Syn1 PE=1 SV=2	90.27	3.97	74097	45	2	1	2	1	2	1
CN37_MOUSE	Cnp	CN37_MOUSE; Q3TYL9_MOUSE; Q3TYV5_MOUSE		sp|P16330|CN37_MOUSE 2',3'-cyclic-nucleotide 3'-phosphodiesterase OS=Mus musculus OX=10090 GN=Cnp PE=1 SV=3	89.97	6.67	47123	33	2	2	2	2	2	2
GSTM5_MOUSE	Gstm5	E9PV63_MOUSE; GSTM5_MOUSE	A2AE91_MOUSE; D3YVP5_MOUSE; D3YVP6_MOUSE; D3YX76_MOUSE; D3YZ29_MOUSE; E9PVM7_MOUSE; E9QAC8_MOUSE; GSTM2_MOUSE; GSTM4_MOUSE; GSTM7_MOUSE; Q6PJ91_MOUSE	sp|P48774|GSTM5_MOUSE Glutathione S-transferase Mu 5 OS=Mus musculus OX=10090 GN=Gstm5 PE=1 SV=1	87.97	8.04	26635	18	2	1	2	1	4	1
TCPA_MOUSE	Tcp1	TCPA_MOUSE	F2Z483_MOUSE; W0TYI4_MOUSE	sp|P11983|TCPA_MOUSE T-complex protein 1 subunit alpha OS=Mus musculus OX=10090 GN=Tcp1 PE=1 SV=3	86.98	3.78	60449	35	2	2	2	2	2	2
TCPZ_MOUSE	Cct6a	A0A571BEL9_MOUSE; Q3TI05_MOUSE; Q3TI62_MOUSE; Q3TIX8_MOUSE; Q3TW97_MOUSE; Q52KG9_MOUSE; TCPZ_MOUSE	Q8VEI1_MOUSE	sp|P80317|TCPZ_MOUSE T-complex protein 1 subunit zeta OS=Mus musculus OX=10090 GN=Cct6a PE=1 SV=3	86.52	3.95	58004	28	2	2	2	2	2	2
PDE1B_MOUSE	Pde1b	A0A2I3BPC1_MOUSE; PDE1B_MOUSE; Q6PDS5_MOUSE; Q9DBS6_MOUSE		sp|Q01065|PDE1B_MOUSE Calcium/calmodulin-dependent 3',5'-cyclic nucleotide phosphodiesterase 1B OS=Mus musculus OX=10090 GN=Pde1b PE=1 SV=2	85.8	2.99	61226	30	2	2	2	2	2	2
NDRG2_MOUSE	Ndrg2	NDRG2_MOUSE	A0A2I3BPL1_MOUSE; A0A2I3BPW0_MOUSE; A0A2I3BQM5_MOUSE; A0A2I3BQR5_MOUSE; A0A2I3BS20_MOUSE; Q8CGR9_MOUSE	sp|Q9QYG0|NDRG2_MOUSE Protein NDRG2 OS=Mus musculus OX=10090 GN=Ndrg2 PE=1 SV=1	85.61	7.55	40789	19	2	2	2	2	2	2
GPX4_MOUSE	Gpx4	GPX4_MOUSE; Q3TI34_MOUSE; Q3TIF2_MOUSE; Q5XJZ8_MOUSE; Q76LV0_MOUSE; S4R1E5_MOUSE	Q8K4U7_MOUSE	sp|O70325|GPX4_MOUSE Phospholipid hydroperoxide glutathione peroxidase OS=Mus musculus OX=10090 GN=Gpx4 PE=1 SV=4	83.69	11.68	22229	15	2	2	2	2	5	5
#C#P01966		#C#P01966		SWISS-PROT:P01966 (Bos taurus) Hemoglobin subunit alpha	82.72	16.9	15184	9	2	1	2	1	4	3
EIF3E_MOUSE	Eif3e	EIF3E_MOUSE; Q3UIG0_MOUSE	Q9CT23_MOUSE	sp|P60229|EIF3E_MOUSE Eukaryotic translation initiation factor 3 subunit E OS=Mus musculus OX=10090 GN=Eif3e PE=1 SV=1	79.95	4.04	52221	32	2	2	2	2	2	2
EF1A1_MOUSE	Eef1a1	EF1A1_MOUSE; EF1A2_MOUSE; Q3TII3_MOUSE; Q3UA81_MOUSE; Q3UZQ3_MOUSE; Q58E64_MOUSE		sp|P10126|EF1A1_MOUSE Elongation factor 1-alpha 1 OS=Mus musculus OX=10090 GN=Eef1a1 PE=1 SV=3	79.38	4.11	50114	25	2	2	2	2	3	3
PURA_MOUSE	Pura	PURA_MOUSE	Q8C6E9_MOUSE	sp|P42669|PURA_MOUSE Transcriptional activator protein Pur-alpha OS=Mus musculus OX=10090 GN=Pura PE=1 SV=1	79.19	5.92	34884	14	2	2	2	2	4	4
RANB9_MOUSE	Ranbp9	E9Q5D6_MOUSE; RANB9_MOUSE		sp|P69566|RANB9_MOUSE Ran-binding protein 9 OS=Mus musculus OX=10090 GN=Ranbp9 PE=1 SV=1	75	2.91	71012	28	2	2	2	2	2	2
MARK3_MOUSE	Mark3	A0A1Y7VNZ6_MOUSE; MARK3_MOUSE; Q5DTG3_MOUSE; Q9JKE5_MOUSE	A0A0A6YY78_MOUSE; A0A0R4J0B1_MOUSE; A0A0R4J227_MOUSE; A0A1Y7VJB1_MOUSE; C9K101_MOUSE; E9PYX3_MOUSE; E9Q2J6_MOUSE; E9Q9N6_MOUSE; E9QMP6_MOUSE; F6ZS70_MOUSE; MARK1_MOUSE; MARK2_MOUSE; MARK4_MOUSE; Q14DQ3_MOUSE; Q3T9A3_MOUSE; Q3U3A1_MOUSE; Q571J8_MOUSE; Q91Y96_MOUSE	sp|Q03141|MARK3_MOUSE MAP/microtubule affinity-regulating kinase 3 OS=Mus musculus OX=10090 GN=Mark3 PE=1 SV=2	74.95	2.39	84390	47	2	2	2	2	2	2
IF2P_MOUSE	Eif5b	IF2P_MOUSE		sp|Q05D44|IF2P_MOUSE Eukaryotic translation initiation factor 5B OS=Mus musculus OX=10090 GN=Eif5b PE=1 SV=2	73.62	1.73	137616	57	2	2	2	2	2	2
PGK1_MOUSE	Pgk1	PGK1_MOUSE		sp|P09411|PGK1_MOUSE Phosphoglycerate kinase 1 OS=Mus musculus OX=10090 GN=Pgk1 PE=1 SV=4	72.71	4.56	44550	31	2	2	2	2	2	2
HINT1_MOUSE	Hint1	HINT1_MOUSE	B0R1E3_MOUSE	sp|P70349|HINT1_MOUSE Histidine triad nucleotide-binding protein 1 OS=Mus musculus OX=10090 GN=Hint1 PE=1 SV=3	71.86	18.25	13777	8	2	2	2	2	3	3
BACH_MOUSE	Acot7	BACH_MOUSE; E9PYH2_MOUSE		sp|Q91V12|BACH_MOUSE Cytosolic acyl coenzyme A thioester hydrolase OS=Mus musculus OX=10090 GN=Acot7 PE=1 SV=2	71.17	6.3	42537	22	2	2	2	2	3	3
CKAP5_MOUSE	Ckap5	A0A0R4J0K2_MOUSE; CKAP5_MOUSE; K3W4R5_MOUSE; Z4YL78_MOUSE	Q80U79_MOUSE	sp|A2AGT5|CKAP5_MOUSE Cytoskeleton-associated protein 5 OS=Mus musculus OX=10090 GN=Ckap5 PE=1 SV=1	70.96	1.13	225635	121	2	2	2	2	2	2
Q4L0E7_MOUSE	Krt77	Q4L0E7_MOUSE; Q678L1_MOUSE	#C#H-INV:HIT000016045	tr|Q4L0E7|Q4L0E7_MOUSE Type II cytokeratin Kb39 (Fragment) OS=Mus musculus OX=10090 GN=Krt77 PE=2 SV=1	70.87	9.46	25801	19	2	1	2	1	3	1
KPB2_MOUSE	Phka2	A2AHQ7_MOUSE; KPB2_MOUSE; Q6PE66_MOUSE		sp|Q8BWJ3|KPB2_MOUSE Phosphorylase b kinase regulatory subunit alpha, liver isoform OS=Mus musculus OX=10090 GN=Phka2 PE=1 SV=1	70.7	0.97	138492	61	2	2	2	2	3	3
CAMKV_MOUSE	Camkv	A0A0A6YW88_MOUSE; CAMKV_MOUSE	A0A0A6YXI7_MOUSE	sp|Q3UHL1|CAMKV_MOUSE CaM kinase-like vesicle-associated protein OS=Mus musculus OX=10090 GN=Camkv PE=1 SV=2	70.28	6.05	54819	24	2	2	2	2	2	2
#C#Q7RTT2		#C#Q7RTT2; #C#Q8N1N4-2	NFH_MOUSE; Q80TQ3_MOUSE	TREMBL:Q7RTT2 Tax_Id=9606 Gene_Symbol=KRT78 Keratin-78	68.79	3.84	56965	35	2	1	2	1	3	1
CSN7A_MOUSE	Cops7a	CSN7A_MOUSE; D3YVI6_MOUSE; D3Z0S0_MOUSE; D3Z440_MOUSE		sp|Q9CZ04|CSN7A_MOUSE COP9 signalosome complex subunit 7a OS=Mus musculus OX=10090 GN=Cops7a PE=1 SV=2	68.76	9.45	30224	16	2	2	2	2	4	4
TENR_MOUSE	Tnr	TENR_MOUSE		sp|Q8BYI9|TENR_MOUSE Tenascin-R OS=Mus musculus OX=10090 GN=Tnr PE=1 SV=2	68.47	1.55	149589	66	2	2	2	2	2	2
TPM3_MOUSE	Tpm3	A0A0R4J1P2_MOUSE; E9Q5J9_MOUSE; Q8K0Z5_MOUSE; TPM3_MOUSE		sp|P21107|TPM3_MOUSE Tropomyosin alpha-3 chain OS=Mus musculus OX=10090 GN=Tpm3 PE=1 SV=3	68.24	8.77	32994	24	2	1	2	1	4	1
CBR1_MOUSE	Cbr1	B2RXY7_MOUSE; CBR1_MOUSE	A0A338P684_MOUSE	sp|P48758|CBR1_MOUSE Carbonyl reductase [NADPH] 1 OS=Mus musculus OX=10090 GN=Cbr1 PE=1 SV=3	68.24	6.5	30641	19	2	2	2	2	2	2
PFKAM_MOUSE	Pfkm	PFKAM_MOUSE; Q99K08_MOUSE	Q1LZL7_MOUSE	sp|P47857|PFKAM_MOUSE ATP-dependent 6-phosphofructokinase, muscle type OS=Mus musculus OX=10090 GN=Pfkm PE=1 SV=3	67.48	2.56	85269	40	2	1	2	1	2	1
CALB1_MOUSE	Calb1	CALB1_MOUSE; Q8CEF3_MOUSE	Q8C5H2_MOUSE	sp|P12658|CALB1_MOUSE Calbindin OS=Mus musculus OX=10090 GN=Calb1 PE=1 SV=2	67.23	8.05	29994	15	2	2	2	2	2	2
D3YVR0_MOUSE	Tpm3	D3YVR0_MOUSE		tr|D3YVR0|D3YVR0_MOUSE Tropomyosin alpha-3 chain (Fragment) OS=Mus musculus OX=10090 GN=Tpm3 PE=1 SV=1	67.08	43.66	8386	6	2	1	2	1	4	1
NISCH_MOUSE	Nisch	NISCH_MOUSE	B7ZN33_MOUSE	sp|Q80TM9|NISCH_MOUSE Nischarin OS=Mus musculus OX=10090 GN=Nisch PE=1 SV=2	66.71	1.38	175012	80	2	2	2	2	2	2
RS14_MOUSE	Rps14	O70569_MOUSE; Q3UJS5_MOUSE; RS14_MOUSE	D3YVF4_MOUSE; D3Z7I1_MOUSE	sp|P62264|RS14_MOUSE 40S ribosomal protein S14 OS=Mus musculus OX=10090 GN=Rps14 PE=1 SV=3	66.67	15.89	16273	6	2	2	2	2	2	2
LBN_MOUSE	Evc2	LBN_MOUSE		sp|Q8K1G2|LBN_MOUSE Limbin OS=Mus musculus OX=10090 GN=Evc2 PE=1 SV=1	65.37	2.46	137639	70	2	2	2	2	3	3
PLD2_MOUSE	Pld2	PLD2_MOUSE; Q3UNY4_MOUSE; Q5SXG5_MOUSE; Q6NV49_MOUSE	Q80ZW1_MOUSE	sp|P97813|PLD2_MOUSE Phospholipase D2 OS=Mus musculus OX=10090 GN=Pld2 PE=1 SV=2	65.13	2.57	106168	60	2	2	2	2	2	2
VATB2_MOUSE	Atp6v1b2	A0A1S6GWG6_MOUSE; VATB2_MOUSE	B0LAC8_MOUSE; Q6P6I3_MOUSE; Q8C3L6_MOUSE; Q91YH6_MOUSE; Q99KA3_MOUSE	sp|P62814|VATB2_MOUSE V-type proton ATPase subunit B, brain isoform OS=Mus musculus OX=10090 GN=Atp6v1b2 PE=1 SV=1	64.98	4.31	56551	29	2	2	2	2	2	2
RS12_MOUSE	Rps12	A0A1W2P7A1_MOUSE; F7AEH4_MOUSE; Q6ZWZ6_MOUSE; RS12_MOUSE		sp|P63323|RS12_MOUSE 40S ribosomal protein S12 OS=Mus musculus OX=10090 GN=Rps12 PE=1 SV=2	64.93	11.36	14525	7	2	2	2	2	2	2
MAST4_MOUSE	Mast4	A0A0A6YXG1_MOUSE; A0A668KMA1_MOUSE; E9PWX8_MOUSE; E9QPR4_MOUSE; MAST4_MOUSE	A0A668KL31_MOUSE; A0A668KLF8_MOUSE; B1AST7_MOUSE; B1AST8_MOUSE; E9Q1M8_MOUSE; E9Q1Q1_MOUSE; E9Q4Q9_MOUSE; E9Q6G0_MOUSE; E9Q6Q5_MOUSE; E9QLW6_MOUSE; MAST1_MOUSE; MAST2_MOUSE; Q3URY8_MOUSE	sp|Q811L6|MAST4_MOUSE Microtubule-associated serine/threonine-protein kinase 4 OS=Mus musculus OX=10090 GN=Mast4 PE=1 SV=3	63.52	0.73	284004	154	2	2	2	2	2	2
KPCG_MOUSE	Prkcg	KPCG_MOUSE; Q2NKI4_MOUSE; Q3UN66_MOUSE	Q64493_MOUSE	sp|P63318|KPCG_MOUSE Protein kinase C gamma type OS=Mus musculus OX=10090 GN=Prkcg PE=1 SV=1	63.01	4.3	78358	43	2	2	2	2	2	2
RABE2_MOUSE	Rabep2	Q3TZJ2_MOUSE; RABE2_MOUSE		sp|Q91WG2|RABE2_MOUSE Rab GTPase-binding effector protein 2 OS=Mus musculus OX=10090 GN=Rabep2 PE=1 SV=3	62.91	3.79	62132	33	2	2	2	2	2	2
GET4_MOUSE	Get4	D3Z4J5_MOUSE; GET4_MOUSE	D3Z7S0_MOUSE	sp|Q9D1H7|GET4_MOUSE Golgi to ER traffic protein 4 homolog OS=Mus musculus OX=10090 GN=Get4 PE=1 SV=2	62.86	10.09	36525	16	2	2	2	2	2	2
RL31_MOUSE	Rpl31	Q5M9K9_MOUSE; Q9CY93_MOUSE; RL31_MOUSE	A0A0A6YX26_MOUSE; A0A0A6YXL3_MOUSE; Q58DZ1_MOUSE	sp|P62900|RL31_MOUSE 60S ribosomal protein L31 OS=Mus musculus OX=10090 GN=Rpl31 PE=1 SV=1	62.5	15.2	14463	7	2	2	2	2	2	2
EID2_MOUSE	Eid2	EID2_MOUSE		sp|Q6X7S9|EID2_MOUSE EP300-interacting inhibitor of differentiation 2 OS=Mus musculus OX=10090 GN=Eid2 PE=1 SV=1	61.95	8.9	25304	17	2	2	2	2	4	4
SMC1A_MOUSE	Smc1a	A0JLM6_MOUSE; SMC1A_MOUSE		sp|Q9CU62|SMC1A_MOUSE Structural maintenance of chromosomes protein 1A OS=Mus musculus OX=10090 GN=Smc1a PE=1 SV=4	61.77	1.46	143235	88	2	2	2	2	2	2
PRDX2_MOUSE	Prdx2	PRDX2_MOUSE; Q5M9N9_MOUSE	D3Z4A4_MOUSE	sp|Q61171|PRDX2_MOUSE Peroxiredoxin-2 OS=Mus musculus OX=10090 GN=Prdx2 PE=1 SV=3	61.27	9.6	21779	13	2	2	2	2	4	4
#C#Q6ISB0		#C#Q6ISB0; #C#Q9NSB2	#C#O43790; #C#P08729; #C#P78385; #C#P78386; #C#Q14533; #C#Q14CN4-1; #C#Q3KNV1; #C#Q3SY84; #C#Q6IME9; #C#Q6NT21; #C#Q9DCV7; #C#Q9NSB4; K2C72_MOUSE; K2C7_MOUSE; KRT82_MOUSE; KRT84_MOUSE	TREMBL:Q6ISB0 Keratin, hair, basic, 4 - Homo sapiens (Human).	61.01	3.33	64842	39	2	1	2	1	2	1
GLCM_MOUSE	Gba	A0A0G2JDK2_MOUSE; GLCM_MOUSE		sp|P17439|GLCM_MOUSE Lysosomal acid glucosylceramidase OS=Mus musculus OX=10090 GN=Gba PE=1 SV=1	60.95	6.99	57622	24	2	2	2	2	2	2
FAS_MOUSE	Fasn	A0A0U1RNJ1_MOUSE; FAS_MOUSE; Q3TB22_MOUSE; Q3UHT6_MOUSE		sp|P19096|FAS_MOUSE Fatty acid synthase OS=Mus musculus OX=10090 GN=Fasn PE=1 SV=2	60.81	0.84	272428	136	2	2	2	2	2	2
GEPH_MOUSE	Gphn	A0JNY3_MOUSE; GEPH_MOUSE		sp|Q8BUV3|GEPH_MOUSE Gephyrin OS=Mus musculus OX=10090 GN=Gphn PE=1 SV=2	60.36	3.25	83282	48	2	2	2	2	2	2
E9Q1K0_MOUSE	Snx25	E9Q1K0_MOUSE; Q7TQF4_MOUSE; SNX25_MOUSE		Sorting nexin-25 OS=Mus musculus OX=10090 GN=Snx25 PE=1 SV=1	59.94	1.12	112170	64	2	2	2	2	3	3
PKHA7_MOUSE	Plekha7	A0A0U1RPA0_MOUSE; PKHA7_MOUSE		sp|Q3UIL6|PKHA7_MOUSE Pleckstrin homology domain-containing family A member 7 OS=Mus musculus OX=10090 GN=Plekha7 PE=1 SV=2	59.71	2.33	126742	75	2	2	2	2	4	4
CSN3_MOUSE	Cops3	CSN3_MOUSE; Q3UQL2_MOUSE	D3Z036_MOUSE; Q3TEA5_MOUSE; Q8BX58_MOUSE	sp|O88543|CSN3_MOUSE COP9 signalosome complex subunit 3 OS=Mus musculus OX=10090 GN=Cops3 PE=1 SV=3	59.48	6.38	47832	27	2	2	2	2	3	3
A2AGW8_MOUSE	Pramel24	A2AGW8_MOUSE	A2A8M8_MOUSE; A2AGW5_MOUSE; E9Q2S4_MOUSE	PRAME-like 24 OS=Mus musculus OX=10090 GN=Pramel24 PE=3 SV=1	58.89	4.43	54478	26	2	2	2	2	2	2
E1AZ71_MOUSE	Cngb1	E1AZ71_MOUSE; E9PXX0_MOUSE; Q80VQ4_MOUSE; Q80XL8_MOUSE		tr|E1AZ71|E1AZ71_MOUSE Cyclic nucleotide-gated channel beta 1 OS=Mus musculus OX=10090 GN=Cngb1 PE=1 SV=1	58.86	1.28	148716	55	2	2	2	2	3	3
CO7A1_MOUSE	Col7a1	CO7A1_MOUSE	Q6P7U1_MOUSE	sp|Q63870|CO7A1_MOUSE Collagen alpha-1(VII) chain OS=Mus musculus OX=10090 GN=Col7a1 PE=1 SV=3	58.64	0.95	295232	178	2	2	2	2	4	4
CSN5_MOUSE	Cops5	CSN5_MOUSE	A0A087WQ60_MOUSE; A0A087WQA8_MOUSE; Q3V0K7_MOUSE	sp|O35864|CSN5_MOUSE COP9 signalosome complex subunit 5 OS=Mus musculus OX=10090 GN=Cops5 PE=1 SV=3	58.01	7.19	37549	20	2	2	2	2	2	2
G3UYD6_MOUSE	Pkn2	G3UYD6_MOUSE	G3UXH4_MOUSE; G3UZM9_MOUSE; PKN2_MOUSE	tr|G3UYD6|G3UYD6_MOUSE Serine/threonine-protein kinase N2 (Fragment) OS=Mus musculus OX=10090 GN=Pkn2 PE=1 SV=1	57.46	17.14	24207	16	2	2	2	2	2	2
A2A9V9_MOUSE	Kctd2	A2A9V9_MOUSE; F6SH71_MOUSE; Q4VBE7_MOUSE	KCTD2_MOUSE	tr|A2A9V9|A2A9V9_MOUSE BTB/POZ domain-containing protein KCTD2 OS=Mus musculus OX=10090 GN=Kctd2 PE=1 SV=1	57.24	10.06	36163	17	2	2	2	2	2	2
SPTB2_MOUSE	Sptbn1	SPTB2_MOUSE	A0A0A0MQG2_MOUSE; Q5DTR4_MOUSE; Q8BQ35_MOUSE	sp|Q62261|SPTB2_MOUSE Spectrin beta chain, non-erythrocytic 1 OS=Mus musculus OX=10090 GN=Sptbn1 PE=1 SV=2	56.71	0.97	274223	163	2	2	2	2	2	2
A0A0G2JFR8_MOUSE	Atrx	A0A0G2JFR8_MOUSE		tr|A0A0G2JFR8|A0A0G2JFR8_MOUSE Transcriptional regulator ATRX (Fragment) OS=Mus musculus OX=10090 GN=Atrx PE=1 SV=1	56.63	5.09	37384	16	2	2	2	2	2	2
A0A087WS16_MOUSE	Col6a3	A0A087WS16_MOUSE; E9PWQ3_MOUSE; J3QQ16_MOUSE; O88493_MOUSE	D3YWD1_MOUSE; Q66K11_MOUSE; Q6PES2_MOUSE; Q80VJ0_MOUSE; Q99K31_MOUSE; Q9Z0I9_MOUSE	tr|A0A087WS16|A0A087WS16_MOUSE Collagen, type VI, alpha 3 OS=Mus musculus OX=10090 GN=Col6a3 PE=1 SV=1	56.34	0.75	288693	174	2	2	2	2	2	2
LRBA_MOUSE	Lrba	A0A0A6YXL6_MOUSE; A0A0A6YXX3_MOUSE; E9Q3Y4_MOUSE; LRBA_MOUSE	A0A1D5RM41_MOUSE; Q8BSM6_MOUSE; Q8CBR4_MOUSE	sp|Q9ESE1|LRBA_MOUSE Lipopolysaccharide-responsive and beige-like anchor protein OS=Mus musculus OX=10090 GN=Lrba PE=1 SV=1	56.28	0.74	317064	156	2	1	2	1	2	1
Q9D086_MOUSE	Mis18a	Q9D086_MOUSE		tr|Q9D086|Q9D086_MOUSE Protein yippee-like OS=Mus musculus OX=10090 GN=Mis18a PE=2 SV=1	56.2	9.09	13082	8	2	2	2	2	2	2
GALT5_MOUSE	Galnt5	GALT5_MOUSE; Q14B51_MOUSE		Polypeptide N-acetylgalactosaminyltransferase 5 OS=Mus musculus OX=10090 GN=Galnt5 PE=2 SV=2	56.15	2.58	105780	62	2	2	2	2	3	3
A0A0G2JGQ4_MOUSE	Nub1	A0A0G2JGQ4_MOUSE	A0JLP6_MOUSE; A0PJ90_MOUSE; NUB1_MOUSE; Q3UYM1_MOUSE	tr|A0A0G2JGQ4|A0A0G2JGQ4_MOUSE NEDD8 ultimate buster 1 OS=Mus musculus OX=10090 GN=Nub1 PE=1 SV=1	55.99	3.61	73117	35	2	2	2	2	2	2
PSA_MOUSE	Npepps	E9Q039_MOUSE; F6QYF8_MOUSE; PSA_MOUSE		sp|Q11011|PSA_MOUSE Puromycin-sensitive aminopeptidase OS=Mus musculus OX=10090 GN=Npepps PE=1 SV=2	55.74	2.17	103325	57	2	2	2	2	2	2
DYHC1_MOUSE	Dync1h1	DYHC1_MOUSE; Q80U36_MOUSE	Q8C6T5_MOUSE	sp|Q9JHU4|DYHC1_MOUSE Cytoplasmic dynein 1 heavy chain 1 OS=Mus musculus OX=10090 GN=Dync1h1 PE=1 SV=2	55.73	0.39	532045	287	2	2	2	2	2	2
A0A140LJ69_MOUSE	Unc13b	A0A140LJ69_MOUSE		Protein unc-13 homolog B OS=Mus musculus OX=10090 GN=Unc13b PE=1 SV=1	55.63	0.41	491035	243	2	2	2	2	2	2
CISY_MOUSE	Cs	CISY_MOUSE	Q0QEL9_MOUSE	sp|Q9CZU6|CISY_MOUSE Citrate synthase, mitochondrial OS=Mus musculus OX=10090 GN=Cs PE=1 SV=1	55.01	4.31	51737	21	2	2	2	2	2	2
SYNE1_MOUSE	Syne1	A0A1L1STC6_MOUSE; SYNE1_MOUSE	Q6ZWR5_MOUSE	sp|Q6ZWR6|SYNE1_MOUSE Nesprin-1 OS=Mus musculus OX=10090 GN=Syne1 PE=1 SV=2	54.32	0.23	1009926	578	2	2	2	2	2	2
D3YY44_MOUSE	Dpf1	D3YY44_MOUSE; Q6GTK4_MOUSE	DPF1_MOUSE; F6UJZ6_MOUSE; F6YKQ9_MOUSE	tr|D3YY44|D3YY44_MOUSE Zinc finger protein neuro-d4 OS=Mus musculus OX=10090 GN=Dpf1 PE=1 SV=1	54.28	5.28	45367	22	2	2	2	2	3	3
PCLO_MOUSE	Pclo	PCLO_MOUSE	Q8CHE8_MOUSE; S4R2E0_MOUSE	sp|Q9QYX7|PCLO_MOUSE Protein piccolo OS=Mus musculus OX=10090 GN=Pclo PE=1 SV=4	54.27	0.37	550834	274	2	2	2	2	2	2
BRE1B_MOUSE	Rnf40	A0A0X1KG60_MOUSE; BRE1B_MOUSE	A0A0U1RPJ4_MOUSE	sp|Q3U319|BRE1B_MOUSE E3 ubiquitin-protein ligase BRE1B OS=Mus musculus OX=10090 GN=Rnf40 PE=1 SV=2	53.85	2.4	113967	62	2	2	2	2	2	2
G3DRA8_MOUSE	Msx2	G3DRA8_MOUSE	MSX2_MOUSE; Q3UZH5_MOUSE	Homeobox protein MSX-2 (Fragment) OS=Mus musculus OX=10090 GN=Msx2 PE=2 SV=1	53.75	10.04	28061	16	2	2	2	2	2	2
Q9EQN8_MOUSE		Q9EQN8_MOUSE		Mitosin (Fragment) OS=Mus musculus OX=10090 PE=4 SV=1	53.63	4.94	37897	22	2	2	2	2	2	2
CAD23_MOUSE	Cdh23	CAD23_MOUSE; E9Q7M6_MOUSE; F8WIF5_MOUSE; K4DI74_MOUSE; Q5DUA3_MOUSE; Q5DUA4_MOUSE; Q5DUA5_MOUSE		sp|Q99PF4|CAD23_MOUSE Cadherin-23 OS=Mus musculus OX=10090 GN=Cdh23 PE=1 SV=2	53.04	0.72	369623	134	2	2	2	2	2	2
MACF1_MOUSE	Macf1	A0A0A0MQA6_MOUSE; A0A571BF93_MOUSE; A0A571BGC6_MOUSE; B1ARU4_MOUSE; E9PVY8_MOUSE; E9QA63_MOUSE; E9QNP1_MOUSE; F6Q750_MOUSE; F7ACR9_MOUSE; MACF1_MOUSE	Q80TZ5_MOUSE	sp|Q9QXZ0|MACF1_MOUSE Microtubule-actin cross-linking factor 1 OS=Mus musculus OX=10090 GN=Macf1 PE=1 SV=2	52.48	0.31	831878	474	2	2	2	2	2	2
NBEL2_MOUSE	Nbeal2	A0A0G2JFQ4_MOUSE; B2RXS1_MOUSE; B7ZWL5_MOUSE; E9Q9L6_MOUSE; F6VTL9_MOUSE; NBEL2_MOUSE		sp|Q6ZQA0|NBEL2_MOUSE Neurobeachin-like protein 2 OS=Mus musculus OX=10090 GN=Nbeal2 PE=1 SV=2	52.15	0.98	301924	136	2	2	2	2	2	2
RRBP1_MOUSE	Rrbp1	A2AVJ7_MOUSE; Q6ZPS0_MOUSE; RRBP1_MOUSE	Q8C7E8_MOUSE	sp|Q99PL5|RRBP1_MOUSE Ribosome-binding protein 1 OS=Mus musculus OX=10090 GN=Rrbp1 PE=1 SV=2	51.88	1.37	172879	130	2	2	2	2	2	2
A0A087WQR4_MOUSE	Pik3r4	A0A087WQR4_MOUSE; B2RXR2_MOUSE; B2RY05_MOUSE; PI3R4_MOUSE		Phosphoinositide 3-kinase regulatory subunit 4 (Fragment) OS=Mus musculus OX=10090 GN=Pik3r4 PE=1 SV=1	98.65	3.85	23614	13	1	1	4	4	8	8
A0A087WRT3_MOUSE	Dhx9	A0A087WRT3_MOUSE		tr|A0A087WRT3|A0A087WRT3_MOUSE ATP-dependent RNA helicase A (Fragment) OS=Mus musculus OX=10090 GN=Dhx9 PE=1 SV=1	77.71	19.15	5680	5	1	1	2	2	5	5
E9PVU0_MOUSE	Myo6	E9PVU0_MOUSE; E9Q174_MOUSE; Q6A077_MOUSE; V9GX76_MOUSE; V9GXM4_MOUSE		tr|E9PVU0|E9PVU0_MOUSE Unconventional myosin-6 OS=Mus musculus OX=10090 GN=Myo6 PE=1 SV=1	62.38	0.63	146307	76	1	1	2	2	3	3
S12A2_MOUSE	Slc12a2	E9QM38_MOUSE; S12A2_MOUSE		sp|P55012|S12A2_MOUSE Solute carrier family 12 member 2 OS=Mus musculus OX=10090 GN=Slc12a2 PE=1 SV=2	61.93	1.08	131034	60	1	1	2	2	2	2
Q4PJ05_MOUSE	Hox-2.7	Q4PJ05_MOUSE		ATPase beta-chain homolog OS=Mus musculus OX=10090 GN=Hox-2.7 PE=2 SV=2	57.53	7.14	15496	10	1	1	2	2	2	2
Q3TR37_MOUSE	I730030J21Rik	Q3TR37_MOUSE		tr|Q3TR37|Q3TR37_MOUSE Uncharacterized protein OS=Mus musculus OX=10090 GN=I730030J21Rik PE=2 SV=1	51.31	10.13	8660	6	1	1	2	2	2	2
A0A0N4SVF7_MOUSE	Rc3h2	A0A0N4SVF7_MOUSE		tr|A0A0N4SVF7|A0A0N4SVF7_MOUSE RING-type E3 ubiquitin transferase OS=Mus musculus OX=10090 GN=Rc3h2 PE=1 SV=1	50.44	2.3	53817	28	1	1	2	2	2	2
ALMS1_MOUSE	Alms1	A0A1D5RMI8_MOUSE; ALMS1_MOUSE		sp|Q8K4E0|ALMS1_MOUSE Alstrom syndrome protein 1 homolog OS=Mus musculus OX=10090 GN=Alms1 PE=1 SV=2	43.56	0.31	360215	188	1	1	2	2	2	2
LTOR2_MOUSE	Lamtor2	LTOR2_MOUSE		sp|Q9JHS3|LTOR2_MOUSE Ragulator complex protein LAMTOR2 OS=Mus musculus OX=10090 GN=Lamtor2 PE=1 SV=1	35.31	12	13480	6	1	1	2	2	2	2
A0A140LIN2_MOUSE	Qars	A0A140LIN2_MOUSE		tr|A0A140LIN2|A0A140LIN2_MOUSE Glutaminyl-tRNA synthetase (Fragment) OS=Mus musculus OX=10090 GN=Qars PE=1 SV=1	33.05	5.62	17890	13	1	1	2	2	2	2

## Sheet: peptides
Dpysl2_MOUSE (CRMP2)
sequence	modifications	ptm_protein_positions	psm_score	calculated_mass	charge	experimental_moz	rt	peptide_length	missed_cleavages	start	end	residue_before	residue_after
SAAEVIAQAR			83.64	1014.55	2	508.287	21.7044	10	0	259	268	K	K
GSPLVVISQGK			54.81	1083.63	2	542.828	24.668	11	0	441	451	R	I
KPFPDFVYK			30.64	1139.6	2	570.816	26.0245	9	1	472	480	R	R
GIQEEMEALVK	Oxidation (M6)	Oxidation (M152)	48.56	1261.62	2	631.827	23.8316	11	0	147	157	K	D
GIQEEMEALVK	Dioxidation (M6)	Dioxidation (M152)	40.33	1277.62	2	639.823	21.7701	11	0	147	157	K	D
MVIPGGIDVHTR	Dioxidation (M1)	Dioxidation (M64)	26.46	1325.68	2	663.855	24.1688	12	0	64	75	R	F
IVLEDGTLHVTEGSGR			77.73	1681.86	2	841.949	21.5223	16	0	452	467	K	Y
MDENQFVAVTSTNAAK	Oxidation (M1)	Oxidation (M375)	57.47	1740.8	2	871.417	20.4732	16	0	375	390	K	V
MDENQFVAVTSTNAAK	Dioxidation (M1)	Dioxidation (M375)	68.71	1756.79	2	879.417	24.3664	16	0	375	390	K	V
DNFTLIPEGTNGTEER			31.86	1791.83	2	896.933	27.5634	16	0	346	361	K	M
SITIANQTNCPLYVTK	Trioxidation (C10)	Trioxidation (C248)	59.83	1812.89	2	907.464	24.157	16	0	239	254	R	V
FQLTDSQIYEVLSVIR			97.16	1910.01	2	956.028	36.327	16	0	174	189	R	D
NLHQSGFSLSGAQIDDNIPR			27.71	2168.06	3	723.704	27.323	20	0	533	552	R	R
FQMPDQGMTSADDFFQGTK	Oxidation (M3); Oxidation (M8)	Oxidation (M78); Oxidation (M83)	35.22	2181.9	2	1091.97	27.1579	19	0	76	94	R	A
FQMPDQGMTSADDFFQGTK	Dioxidation (M3); Oxidation (M8)	Dioxidation (M78); Oxidation (M83)	38.35	2197.89	3	733.649	27.7018	19	0	76	94	R	A
FQMPDQGMTSADDFFQGTK	Oxidation (M3); Dioxidation (M8)	Oxidation (M78); Dioxidation (M83)	38.02	2197.89	3	733.649	27.4257	19	0	76	94	R	A
IVNDDQSFYADIYMEDGLIK	Oxidation (M14)	Oxidation (M37)	26.94	2364.08	3	789.045	31.6006	20	0	24	43	K	Q
DIGAIAQVHAENGDIIAEEQQR			76.73	2376.17	3	793.072	23.4652	22	0	190	211	R	I
ILDLGITGPEGHVLSRPEEVEAEAVNR			63.87	2899.5	3	967.521	29.117	27	1	212	238	R	S
E9PWE8_MOUSE (CRMP4)
sequence	modifications	ptm_protein_positions	psm_score	calculated_mass	charge	experimental_moz	rt	peptide_length	missed_cleavages	start	end	residue_before	residue_after
SAADLISQAR			75.17	1030.54	2	516.285	19.9031	10	0	372	381	K	K
GMTTVDDFFQGTK	Dioxidation (M2)	Dioxidation (M196)	58.06	1477.64	2	739.836	24.5521	13	0	195	207	K	A
EPAPESPKPAGVEIR			43.73	1575.83	3	526.29	27.1702	15	1	96	110	R	S
MDENQFVAVTSTNAAK	Oxidation (M1)	Oxidation (M488)	57.47	1740.8	2	871.417	20.4732	16	0	488	503	K	I
MDENQFVAVTSTNAAK	Dioxidation (M1)	Dioxidation (M488)	68.71	1756.79	2	879.417	24.3664	16	0	488	503	K	I
IVNDDQSFYADIYMEDGLIK	Oxidation (M14)	Oxidation (M150)	26.94	2364.08	3	789.045	31.6006	20	0	137	156	R	Q
DPYL1_MOUSE (CRMP1)
sequence	modifications	ptm_protein_positions	psm_score	calculated_mass	charge	experimental_moz	rt	peptide_length	missed_cleavages	start	end	residue_before	residue_after
SAADIIALAR			83.42	999.571	2	500.8	27.432	10	0	259	268	K	K
IVFEDGNISVSK			46.58	1306.68	2	654.353	26.4158	12	0	452	463	K	G
MDENQFVAVTSTNAAK	Oxidation (M1)	Oxidation (M375)	57.47	1740.8	2	871.417	20.4732	16	0	375	390	K	I
MDENQFVAVTSTNAAK	Dioxidation (M1)	Dioxidation (M375)	68.71	1756.79	2	879.417	24.3664	16	0	375	390	K	I

## Sheet: specificity of peptides
	100% for CRMP2	100% for CRMP4	100% for CRMP1
sequence
SAAEVIAQAR
GSPLVVISQGK
KPFPDFVYK
GIQEEMEALVK
MVIPGGIDVHTR
IVLEDGTLHVTEGSGR
MDENQFVAVTSTNAAK
DNFTLIPEGTNGTEER
SITIANQTNCPLYVTK
FQLTDSQIYEVLSVIR
NLHQSGFSLSGAQIDDNIPR
FQMPDQGMTSADDFFQGTK
IVNDDQSFYADIYMEDGLIK
DIGAIAQVHAENGDIIAEEQQR
ILDLGITGPEGHVLSRPEEVEAEAVNR
sequence
SAADLISQAR
GMTTVDDFFQGTK
EPAPESPKPAGVEIR
MDENQFVAVTSTNAAK
IVNDDQSFYADIYMEDGLIK
sequence
SAADIIALAR
IVFEDGNISVSK
MDENQFVAVTSTNAAK
red: specific for CRMP2= 11
blue: specific for CRMP4 = 3
green: specific for CRMP1= 2
