# Supplementary figures and images for: CRMP4-mediated fornix development involves Semaphorin-3E signaling pathway
Source: eLife journal article supplement (doi:10.7554/elife.70361), 2021-12-03

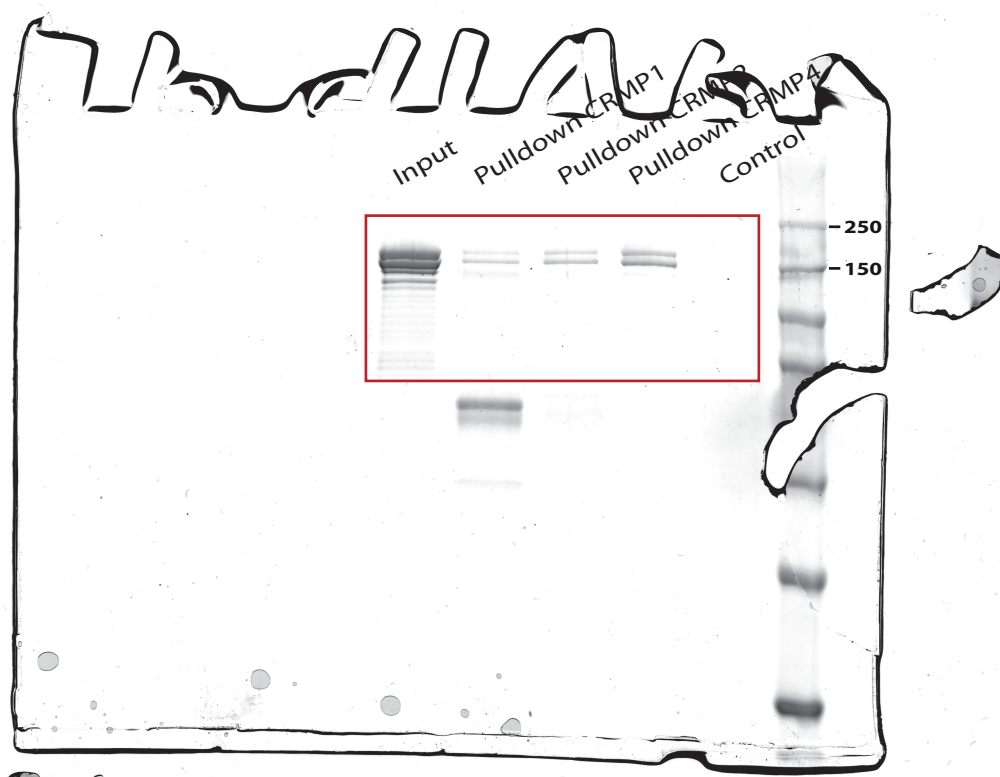

Figure 1-figure supplement 1

Supplement: fig1-data1 [file elife-70361-fig1-data1-v5.zip]

Figure 1A

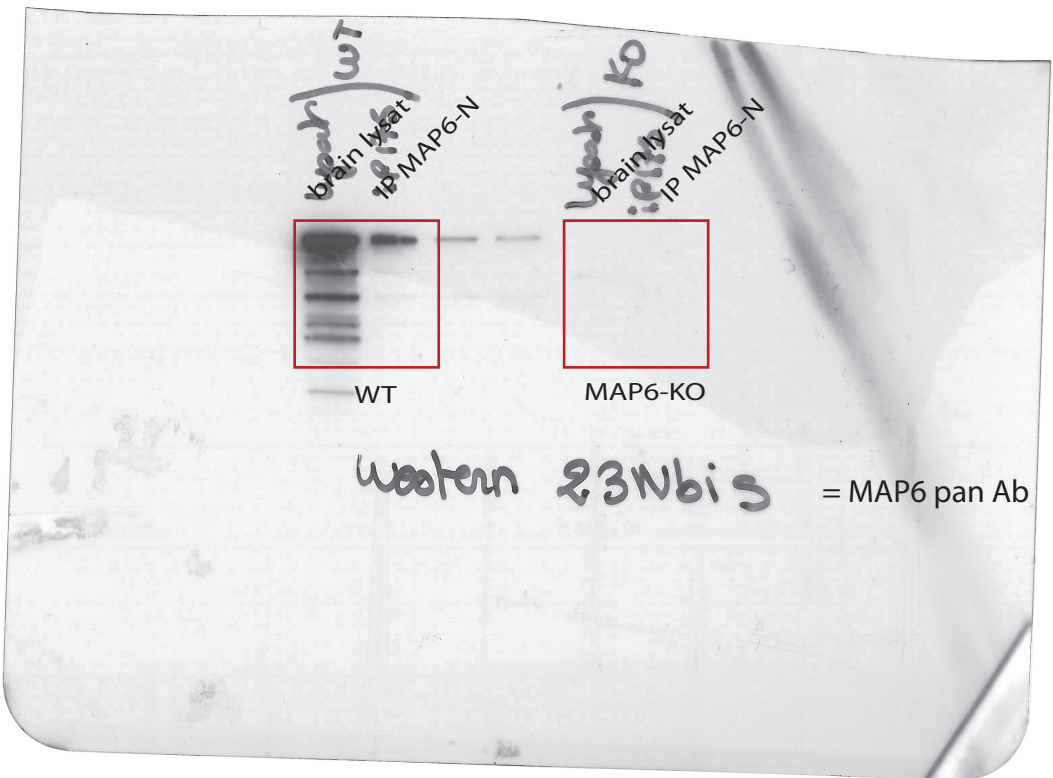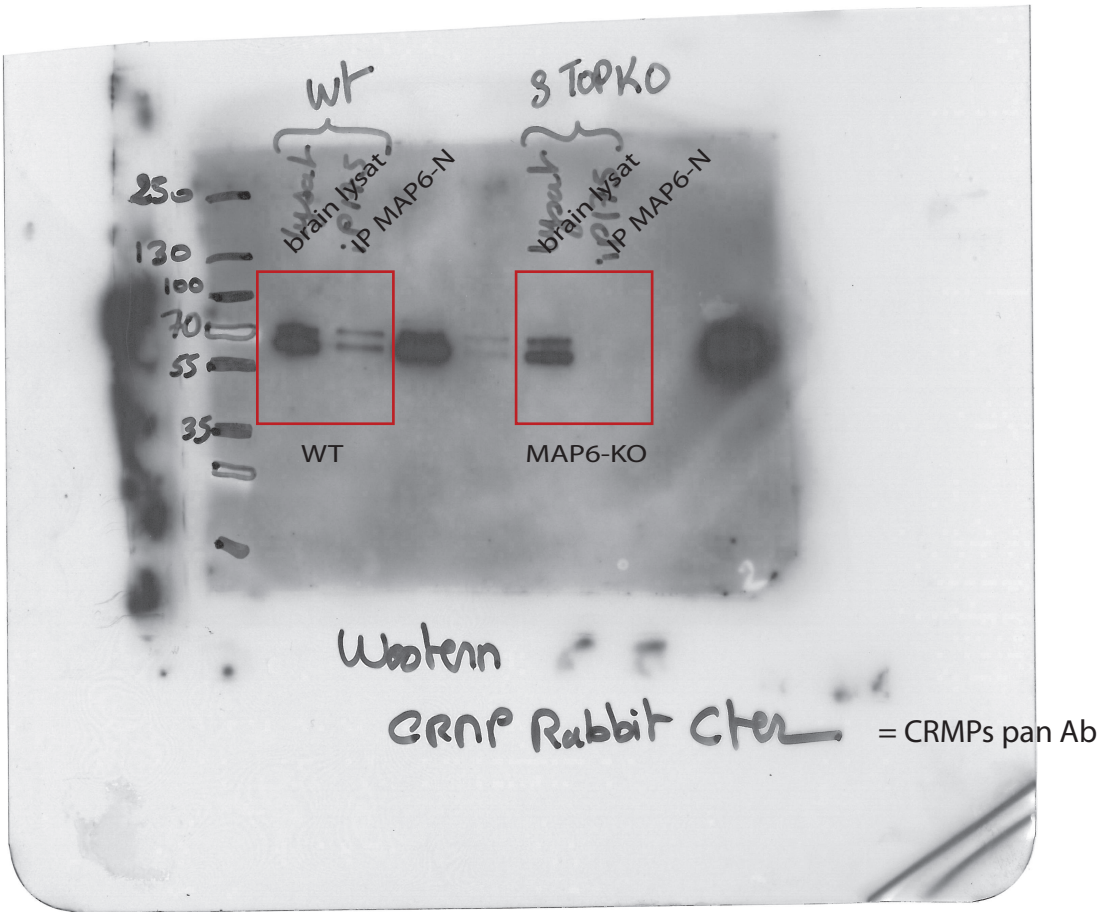

Supplement: fig1-data1 [file elife-70361-fig1-data1-v5.zip]

Figure 10B

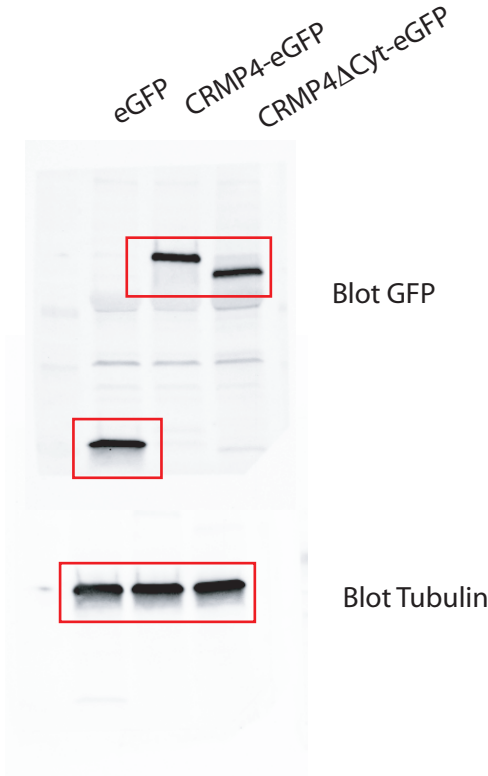

Figure 10C

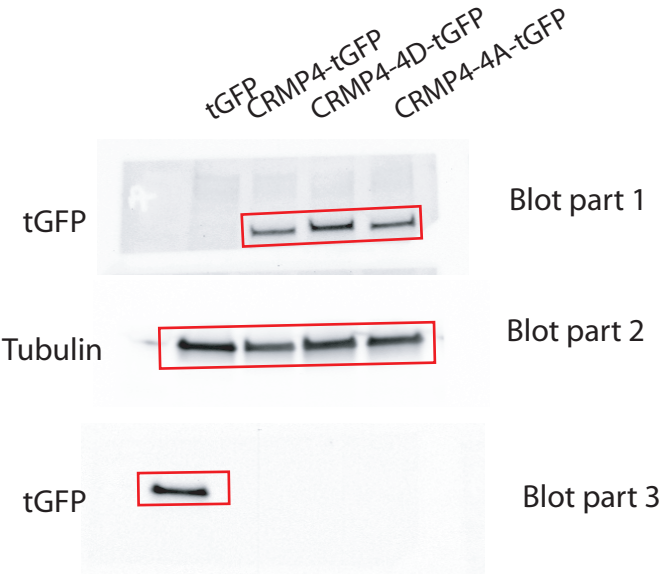

Supplement: fig10-data1 [file Figure 10B and 10C uncropped blot and relevant bands.pdf › Figure 10-Source Data 1/Figure 10B and 10C uncropped blot and relevant bands.pdf]

FIGURE 2A

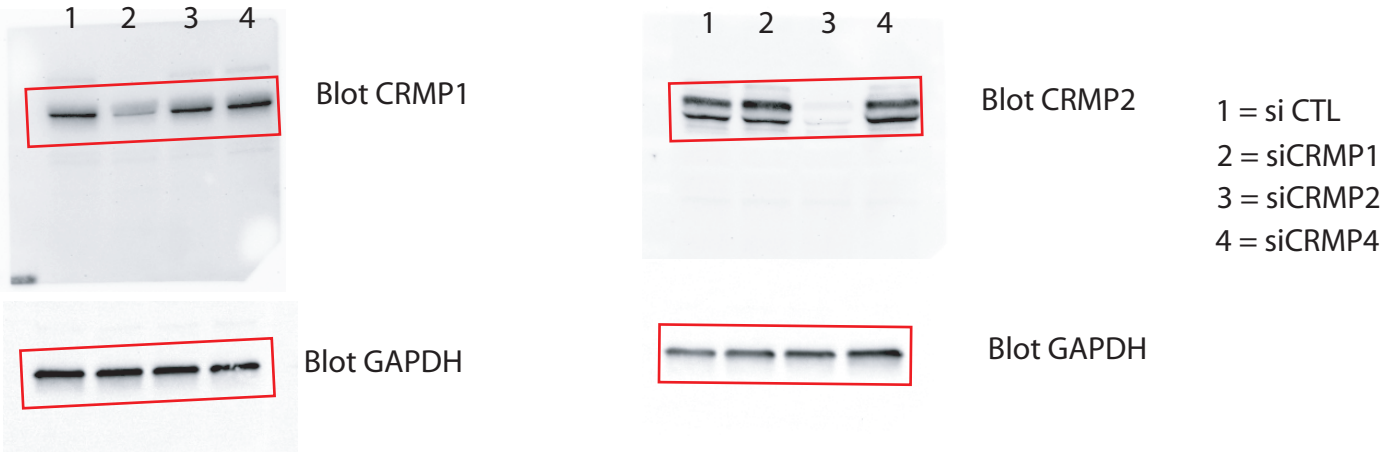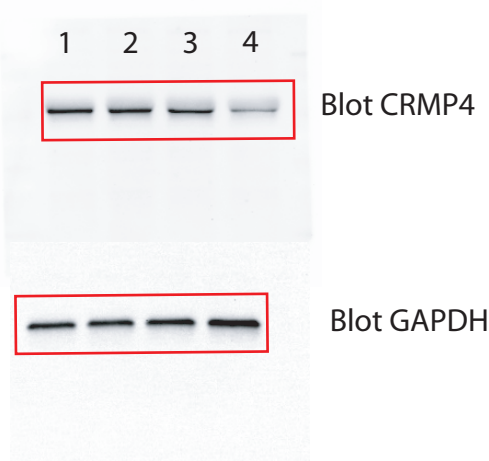

Supplement: fig2-data1 [file elife-70361-fig2-data1-v5.zip]

Figure 3A supplement 1

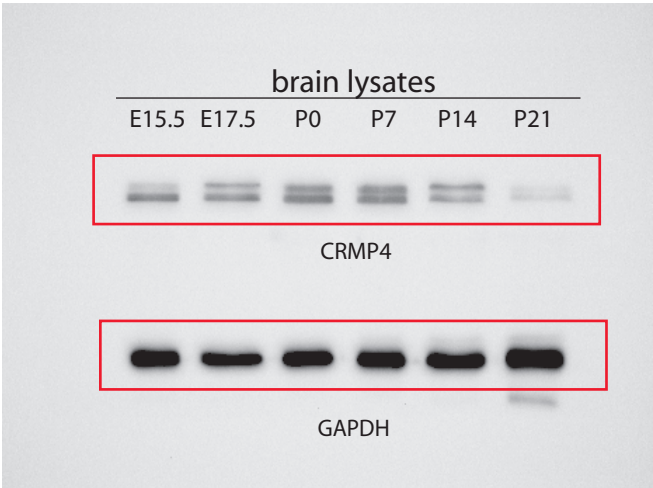

Supplement: fig3-figsupp1-data1 [file elife-70361-fig3-figsupp1-data1-v5.zip]

# Figure 9C

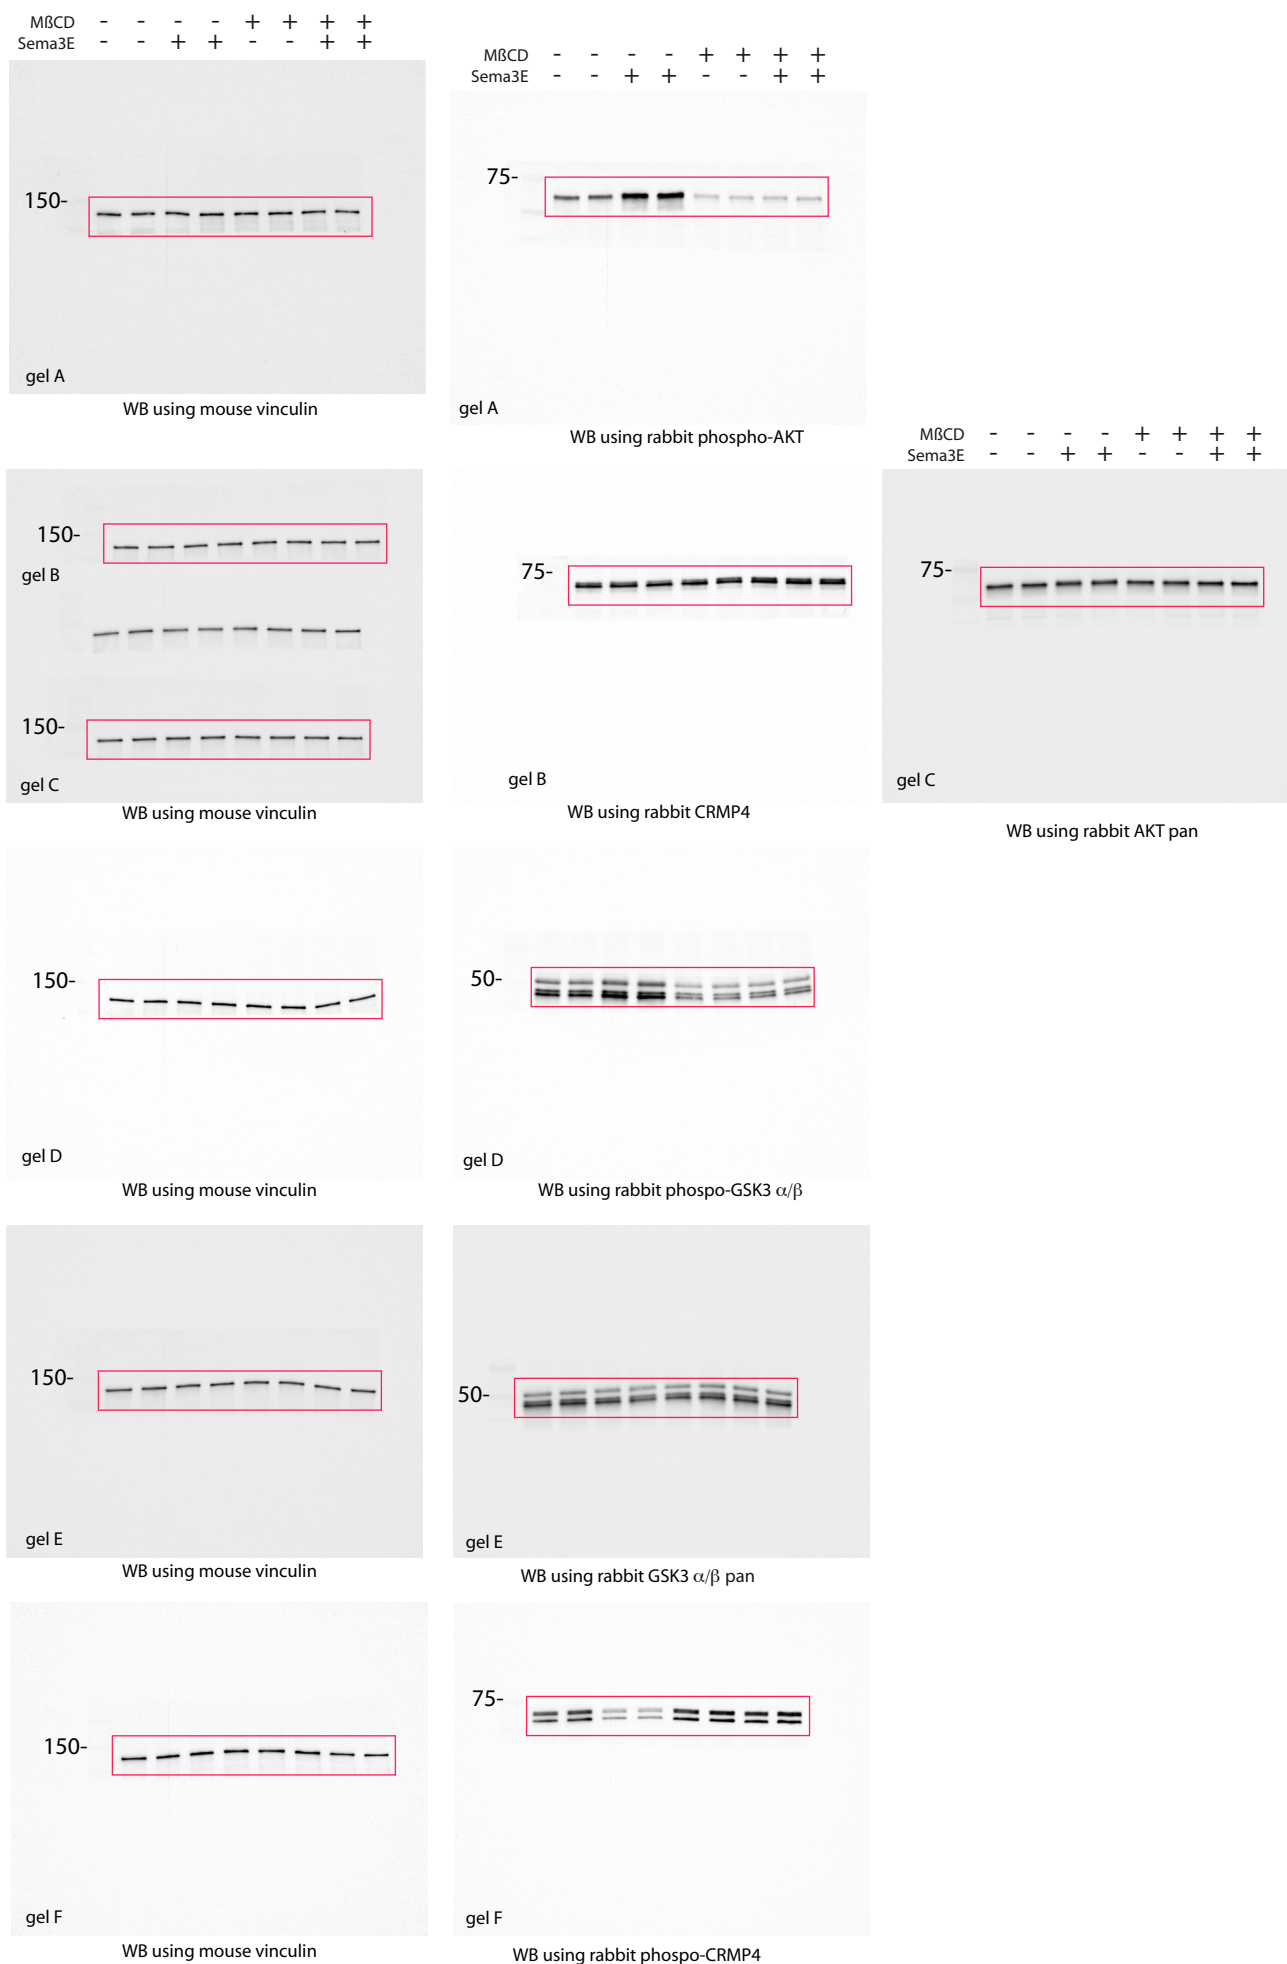

Supplement: fig9-data1 [file elife-70361-fig9-data1-v5.zip]
